# Supplementary material for: Mapping the virome in wild-caught Aedes aegypti from Cairns and Bangkok
Source: PubMed Central journal article supplement (PMC5856816; doi:10.1038/s41598-018-22945-y), 2018-03-16
Supplement: 41598_2018_22945_MOESM1_ESM.pdf [file 41598_2018_22945_MOESM1_ESM.pdf]

**Supplementary information for:**

Mapping the virome in wild-caught *Aedes aegypti* from Cairns and Bangkok

Martha Zakrzewski<sup>1</sup>, Gordana Rasic<sup>2</sup>, Jonathan Darbro<sup>2</sup>, Lutz Krause<sup>1</sup>, Yee S. Poo<sup>3</sup>, Igor Filipovic<sup>2</sup>, Rhys Parry<sup>4</sup>, Sassan Asgari<sup>4</sup>, Greg Devine<sup>2</sup>, Andreas Suhrbier<sup>3,\*</sup>

<sup>1</sup> Medical Genomics, QIMR Berghofer Medical Research Institute, Brisbane, Qld. 4029, Australia.

<sup>2</sup> Mosquito Control, QIMR Berghofer Medical Research Institute, Brisbane, Qld. 4029, Australia.

<sup>3</sup> Inflammation Biology, QIMR Berghofer Medical Research Institute, Brisbane, Qld. 4029, Australia.

<sup>4</sup> School of Biological Sciences, The University of Queensland, Brisbane, Qld. 2072, Australia

\*Correspondence: [Andreas.Suhrbier@qimrberghofer.edu.au](mailto:Andreas.Suhrbier@qimrberghofer.edu.au)

**Running title:** Mapping the *Aedes aegypti* virome

**Key words:** *Aedes aegypti*, insect-specific virus, Phasi Charoen-like virus, Humaita-Tubiacanga virus, Cell fusing agent virus.

**Figure S1. (a)** Read based mapping (using data from Cairns mosquitoes) to PCLV genome segments using BWA mem (colour coding represents percent nucleotide identity). **(b)** Single nucleotide polymorphisms (SNPs) in reads mapping PCLV. SNPs with at least 100 reads and an allele frequency of at least 20% are shown. Cairns 698,434 reads and Bangkok 2,080,162 reads.

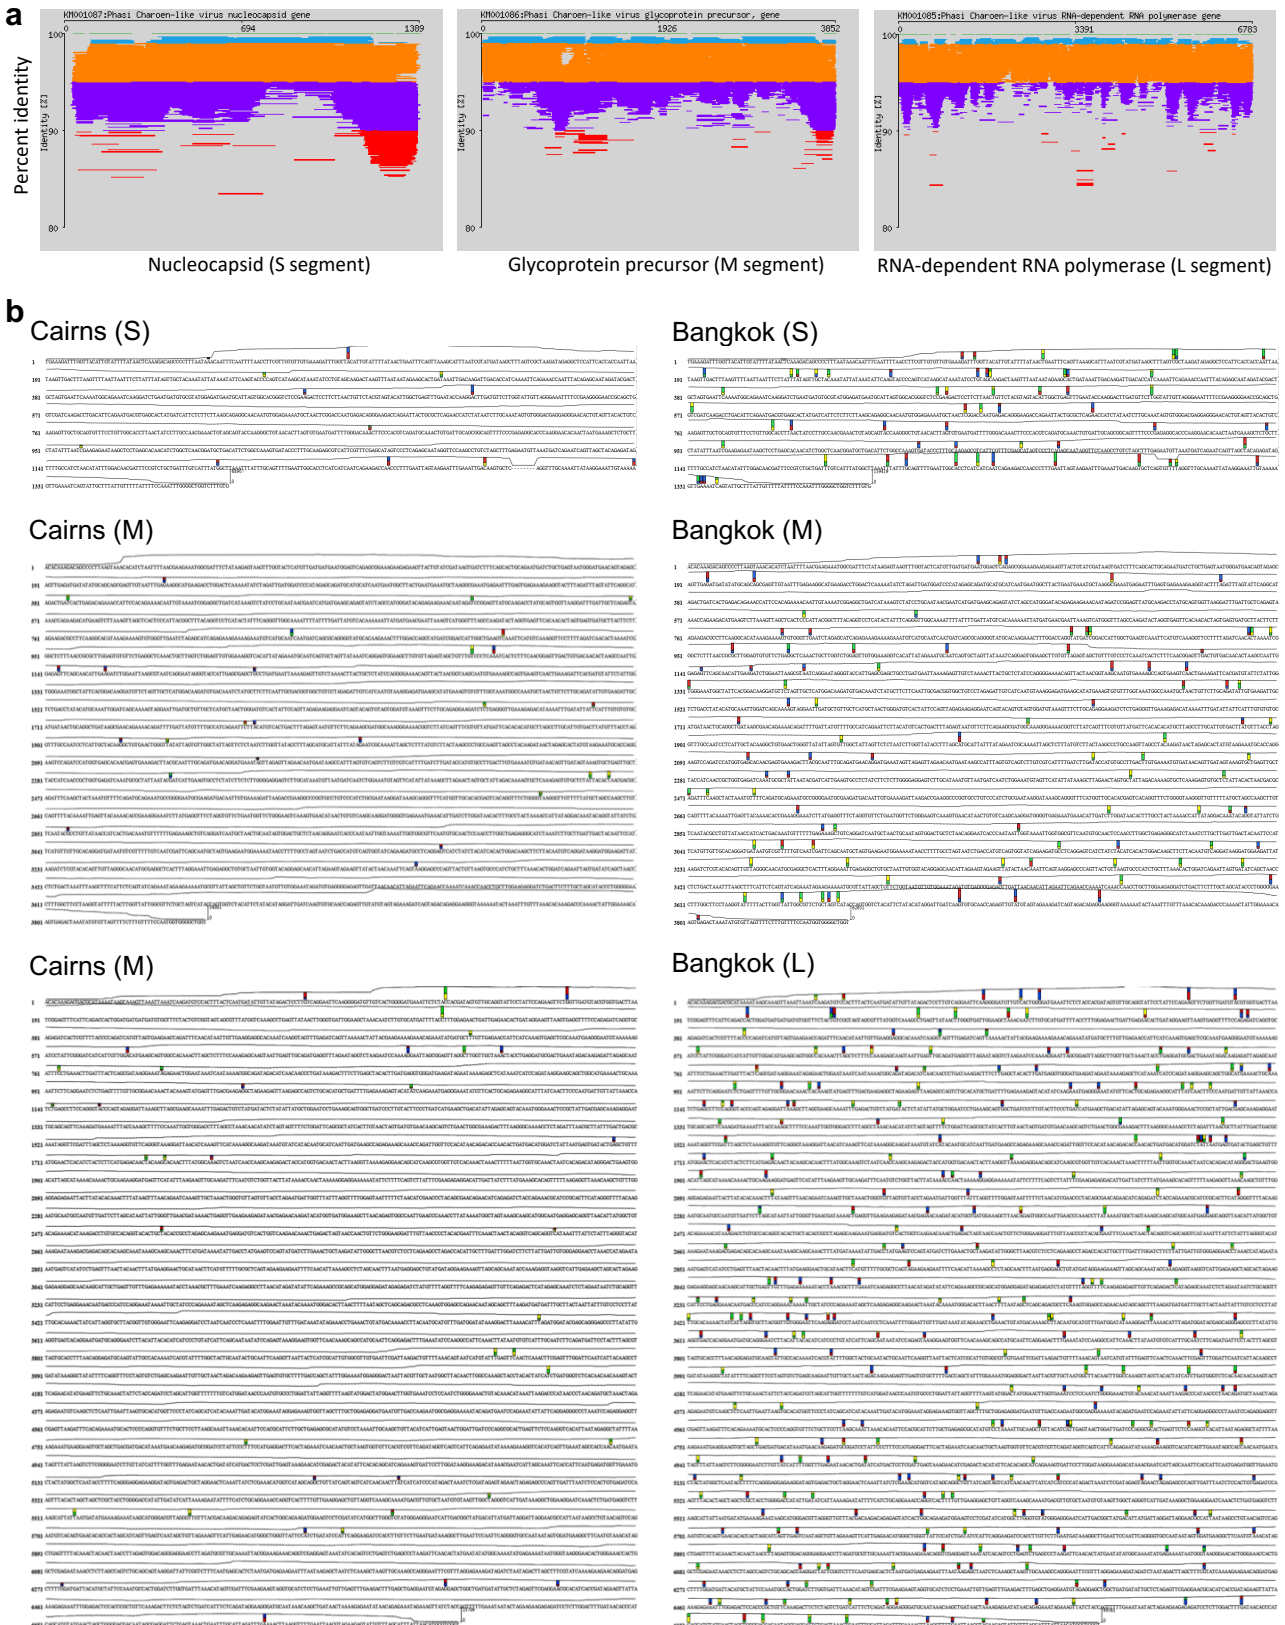

**Figure S2:** Maximum likelihood phylogeny of (a) putative negative-sense RNA viruses and (b) putative positive-sense and double-stranded RNA viruses. Phylogenetic trees of the viral RdRp protein sequences encoded on Cairns and Bangkok contigs and reference sequences from GenBank. Viruses shared between Cairns and Bangkok cluster closely within a clade. Some viruses were unique to each geographic location.

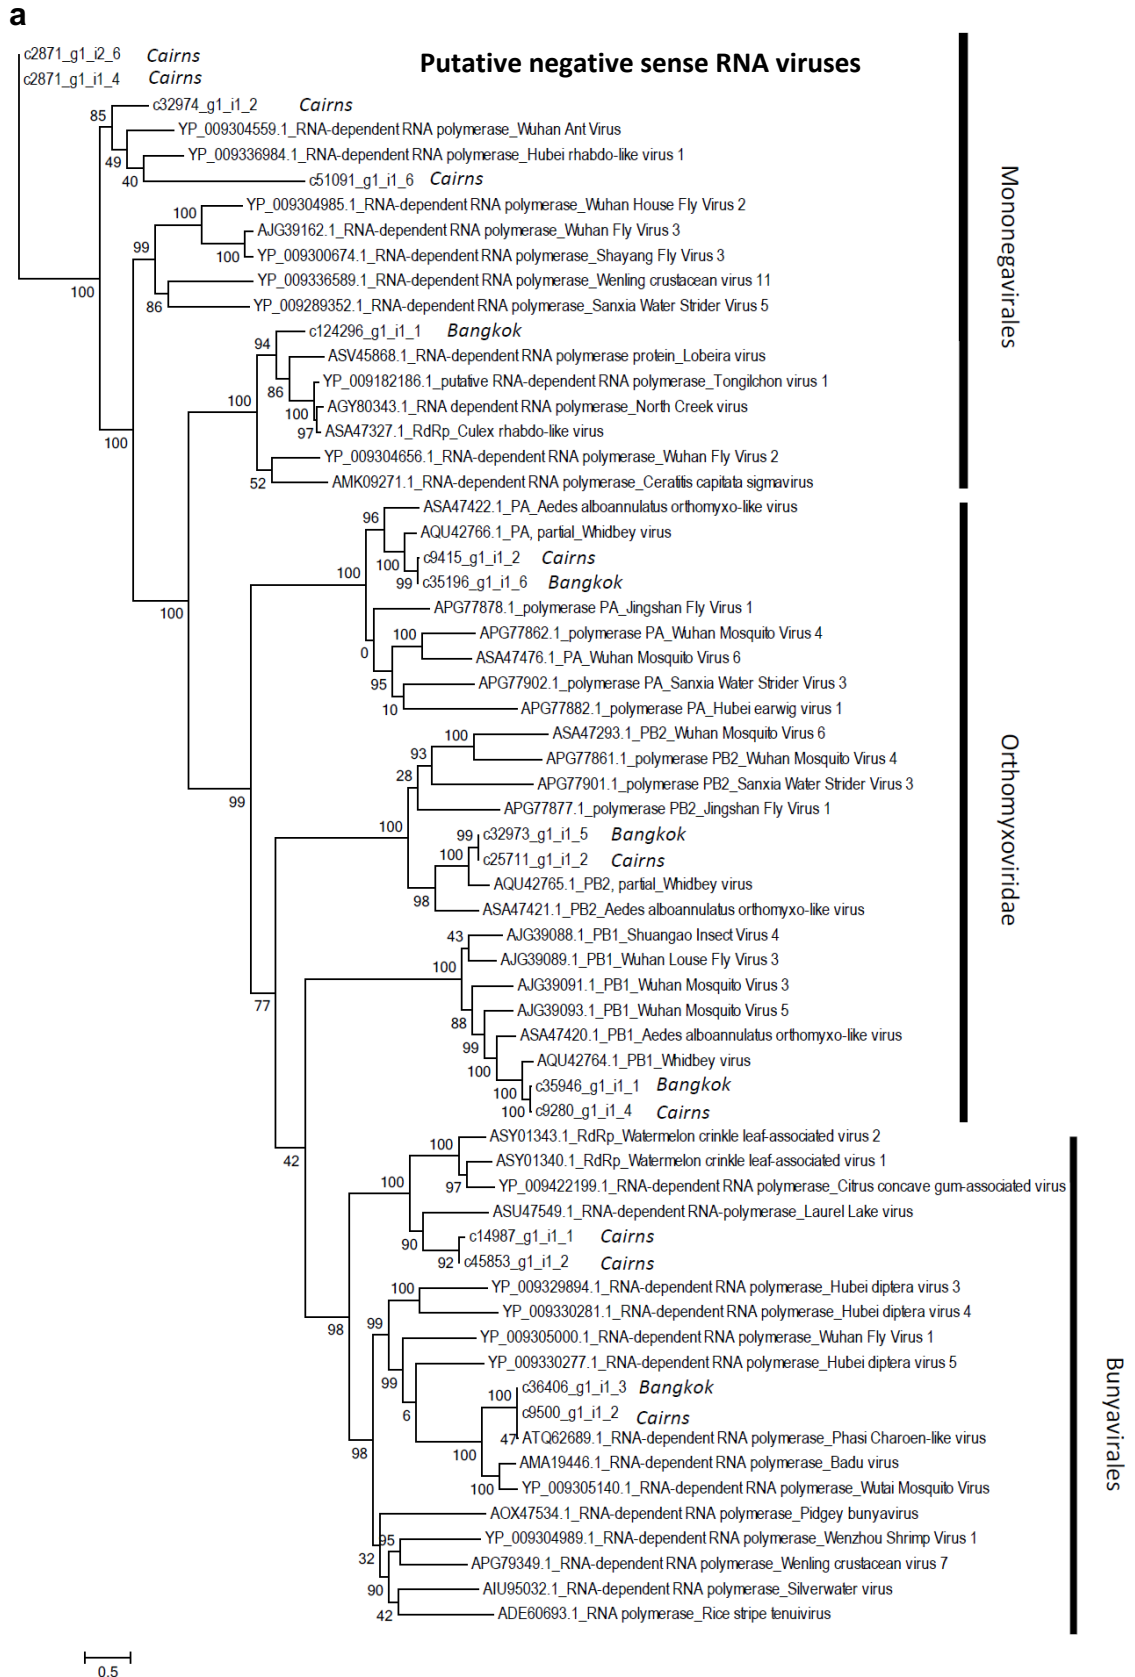

**b**

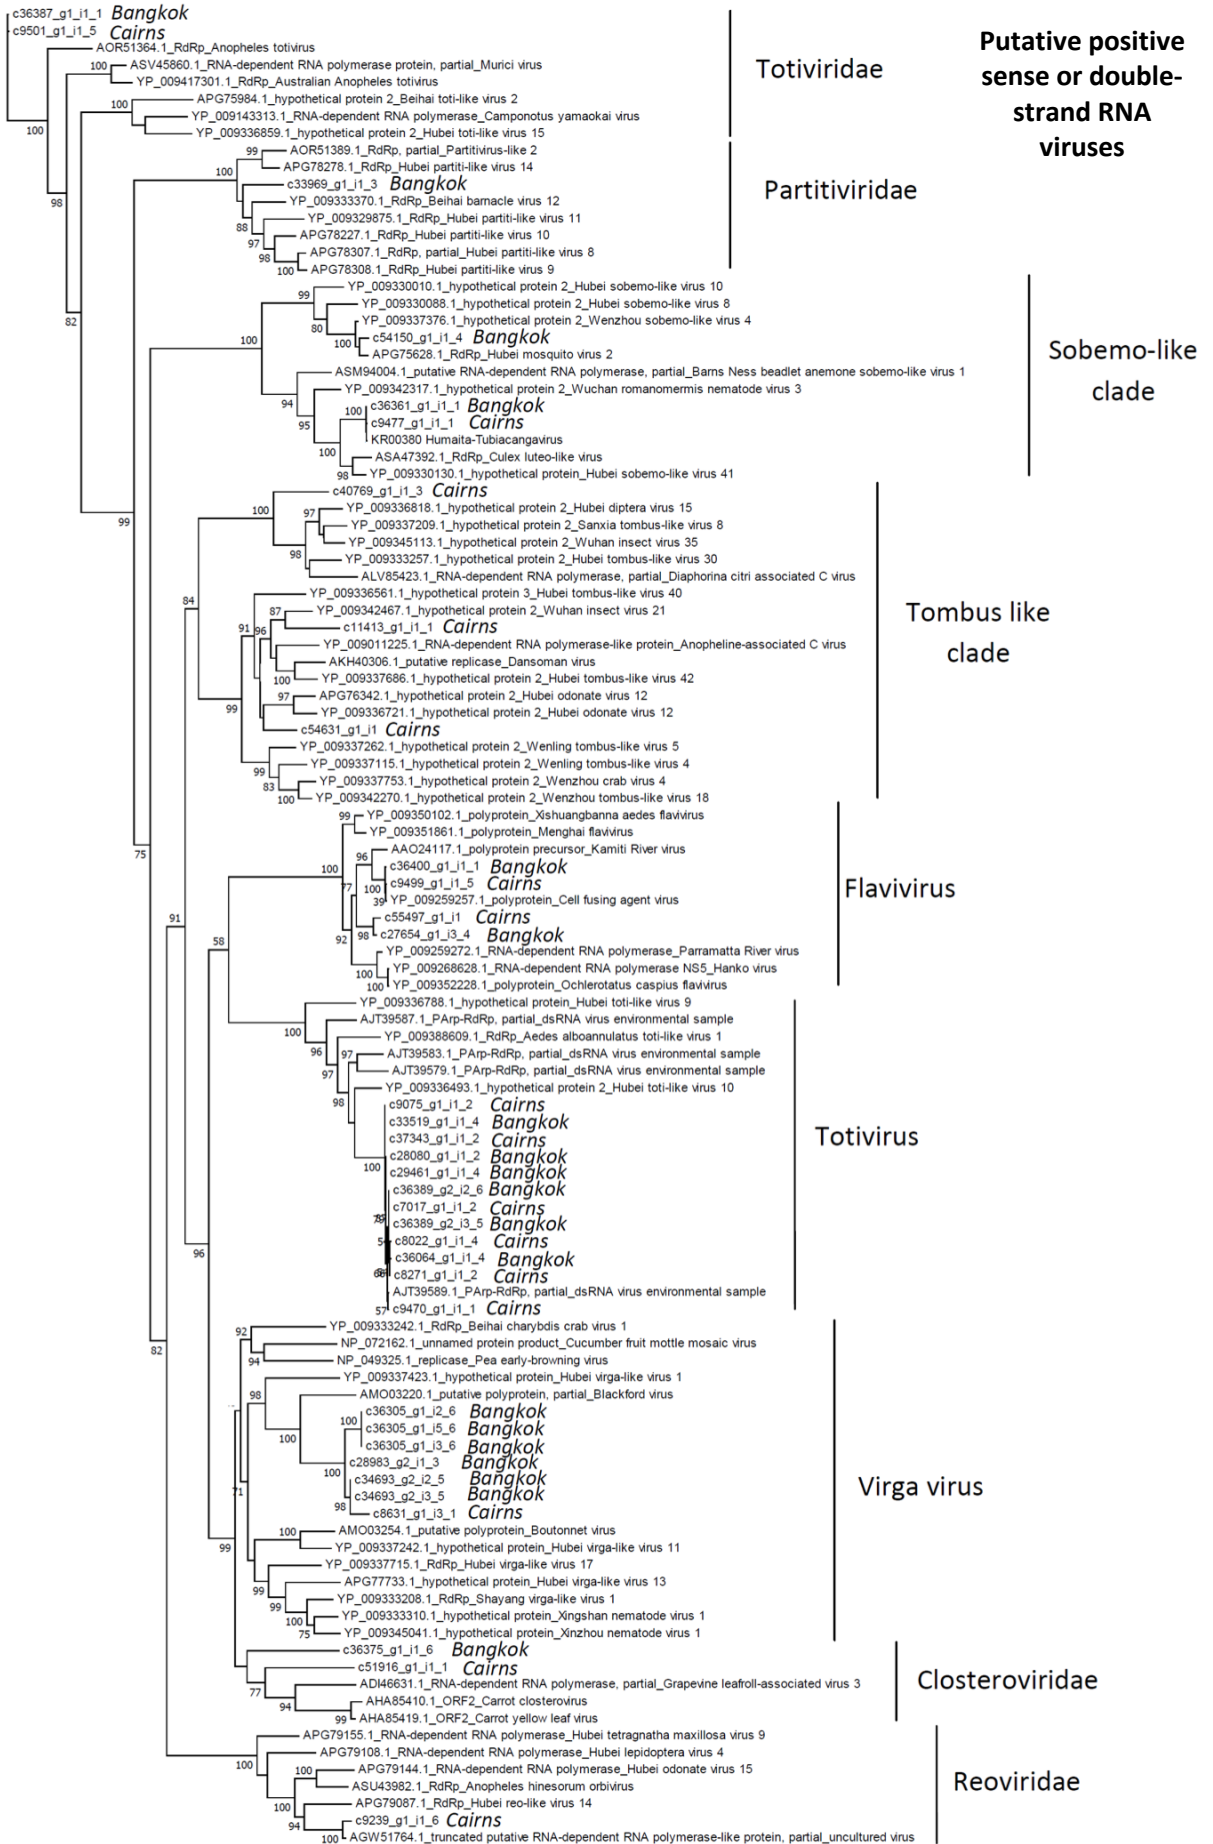

0.5

**Table S1.** Contig nucleotide sequences (len = nucleotide length).

**Cairns contigs**

>c54631\_g1\_i1\_len=221  
TGCTGTGATATTATCCGCACACTTGC AAAAGTTTCACACCACTGTGACGGATAAGTCCGCACCGTACCTCGTGTGTGCTAAAGCCTTGTCTACTAT  
TACACAGATGCACACACACCCTTGTGGCCCTTTGGCTAGATCTCTTGTGCACTACTCTTCCCCAGCTCAATCATCGCAAGCTTAGACGGATT  
ATTCTGTGATGCAACTCGAGCACTACCCTG

>c45395\_g1\_i1\_len=228  
GAATGGTTAGAGCTCATCAATAAGACCATAGGGTGTGGTCAGCCAAGGATTCTAGCGATATGCCATCTCTGGTACATAGGCTGGTATAGCCGGG  
GAGGACGGCAAACTTAATGGATTGGTTCAACCCCTCAGTGGTAATTC CAAGTACACGCAACAGTCAACAACGCCATTAAGCATGGGAACCCGGGA  
AAATTTGAAAGCTTGTGGGATCCATGATGAGGGAG

>c35321\_g1\_i1\_len=563  
GTTGAAATCAATAATTTTGAAACAAGATCTCTCGATAAAGATAATTAATTTGGGATACTCATGCGATAAAAAACCATCACCCATGATTTTAAA  
CAAGAAAATCTAAATAAAGAGGAAAAATCCGAACTTTGAAGGTATTAATAAGTTCGGTACGACTACTGTACCATTAAACG  
TTCACCAATGCGATACGGCATCAATAAACACTAAGGACGACTTACCTGTGTATACAAAATCGTATCGATATCCCTTTTCCATAAAGCAGAAAGTG  
CAAAATCAAATCGGAAAAATGCTAAATCAGGGCATTATTCGTCTTCGAATAGCCCATGGTCTTCCAGGATATGGATAGTCCCGAAGAAAATAGAT  
TCTTCAGGCCAAAAGAAATGGAGGTAGTTATCGATTTATCGAAAGTTGAATGATAAAACCTATCGATGATCGATATCCCTTAATATTACTGAC  
ATTTTAGACAAGCTAGGAAGATGTCAGTACTTCTCAACTATCGATTTGGCTTCTTGATTTACCAGATCGAAGTTGATAAGAA

>c177\_g1\_i1\_len=240  
CGATGGTTTGTACTGAAGCACTTTGTTATAATCACTATCTGCAATGCGGGTTTCACTGCAAGTTTGTATCATAAAGTTGAAAAGATTAGTTAGTC  
GCTCGTTAATACGTAATCGGACTATGACAGTTTGCACGACGCTCGGGATTGTCTTGCCTGCGCAACCAGAGGGAAAAGAGCATGTCGTAATATAT  
TTGGAGGTTACCGACGGAACCATGGACGGCGCAGGCGAGAAGGGAG

>c8631\_g1\_i2\_len=333  
CTGCCCTATATTCAATAAGTTGAAACGCCGTTGGTTGTCCGTTATGCGGTCGAAGTATGTCTACCTCACCGACCTATCCCTCGACGAATTTGAAGA  
ACTACTAAACAAACGATTTCTTTCGATTGAATACCTCAATTCGACGAGAATCGAAAACGACATATCGAAAATGACAAGTCTATGCGAGCTTGGAC  
GCTTGTCACTGACGCGGTAGTTTTATAATTTACAGATTCAATTTATGGCAAATTAGCAAATGAAATTGATTCGATCGACCTCCAGTCCGGTCAAT  
AACCTAGGAAACAGAAAACAAACCCGACCAACATATGGGCAACG

>c8631\_g1\_i3\_len=203  
GCCGCTTTGAAATCCGTCAATGCACCTTTACTGCCCTATTTTCATAAAGTTGAAACGCCGTTGGTTGTCCGTTATGCGGTCGAAGTATGTCTACCTC  
ACCGACTATCCCTCGACGAATTTGAAGAATACTAAACAAACCTCAATTCGACGAGAATCGAAAACGACATATCGAAAATGACAAGTCTATGCG  
AGCTTGGACGC

>c9229\_g1\_i1\_len=1131  
CCATGTGTTCCGATTATGTCAACACATCTTGTATAGTGTCTTGTGGAGATAGGGGAGATCCTCCCACTTTTCGACCCATTTCTTTATGTTTCATC  
CATGGTCAACGAGGTAGAGTCAATGAAACAGTGCATGCGGCGAAAAGCGACGACGAATTCCTCATAGGGCAATTTGGGACACAGGAACGGATAGTAT  
CTTAGGAAACCATCCGTGGAGTGAATACGGAAGTGAAGATTTAGGAGTGCAGTGAATAACCATACCGAATGCGTCGGGACAGTAAAACACACA  
CAGGTCGTGTGGTGTGGGAAAAGTGGGTTCTCGGCTTACACTTCAAGGACGGGAGGGACGGATCGAGAAGGAGACGATCGTCAAGGCAAGAAAT  
AATACAGCTTCGAAAATTCATGTTGTGATGAGACTACGAAATTAATGGAGTGAATAAGCCGAAAATTCGGTGTGAGTGTGTAACGTTCCG  
AAATGGCTTCGGACAGTTGACGGTATATGTAGGCATTCATTAAGGGCTTCAATGTTGTCTTTGACAGAGATTGATACTGCGCCACGTTTCCAGT  
TACGAAGATCAATCTACCTAGTTTCACTAGTAACCTAATGGGGCCAGGAACAACAGTGAAGCCGTCAATGGAGGCGAGGATGAATTTACCGCAAAA  
ATAAGAAGTTTCAAAGTGCCTTAAGGTTTTTGTCTCAAAGTTAAAATGTGCGAGTAAATGGGTGCAACGTTGTCCAGAAGAGAATCTAGACCCCA  
CAGGTGATGTGTCATCACCGGCAAAACACCGCCGAGCAATTCGTAGTCCGGTAAATTTGCCATTGCGACTGCATGATGACGAGGGTGTTCACAAA  
AAAGGTCGAAAGCAACCGGAACGGCGTTGGTAGCCGACGGTAGTCGAAAACCCACTAACAGAATCGAGATACCGAGATAGGACATGACTCTGATA  
CCAGATCAAGGCTAAATGATCTGGTAAGCCTAGAGCCTTATAAATGCGCGTTTCAAACAATAGCGTTGTCGCGCACTGAAGCCTAAGCTTCCGACC  
CGAAGCACACCGAGTTAATCCGTAACCCGATGTTACGTTCCGCGAAGGTTTGAACCTTCCGTTGCGACAGTGTGC

>c14987\_g1\_i1\_len=548  
GAGGATATTATTGCAAATGATTTCCCTTAACAACCTTTCTTTCACTAATTTTGTTCAGTTAGCTACGCTTAAAGCCAGCGCTAGGGATCATTCTCAG  
CTGATCTCTACCCAGAAACATAGATACCAATAGACGCTCCATTTCTAAATCATGTAATGAACCGAATAAAGGAGAGGTAATAAGAGACCAAAG  
GTGCTTGAAGCCCTGATGAACTAGTTGATGAGTATAAGAGATCTGAAGACAGACCTGTTAGGCACGTTATGCAAGTTGATTTCCCTGGTGTCTGAGG  
AAGCTGCAAAATAAGGGGTATTTTGCAGTGTATTTTCCCTAAGCCTCAGCAGGAGGATAGAGAAAATACATGTTTTAGAGATATCTGCCCGA  
CTTGTTCAGTATTGCCCTGAATTAATATCCAGAACAATTTGCAAGTTGTTCCCATCAGAGACAATAACTCATCTGAAACTAAAGAAAGATTTGTA  
AAGTATCACTATAAGCTAACATCTGATACATACAAAAAAGTTTTGTTTTGTCAAAGTCTGCTGATGC

>c32637\_g1\_i1\_len=214  
CGCTATCAGCATCATATACTCCGCTTTGCATTAAGTTTGGTAGATGTGTATATGACCAAGTCGTTAATAAATCGGTTGTGAGTTTTAACGGTGTGAGA  
TGGCTTCTCTGATACGACCATCAGTTGTATACCATCTTCCACCTATTTGAAATTTGGCTGGTAGAAGGGGTGTGCAATCAATTTGCGTACCTCTTT  
TTTGTAAAATATGAGTTACTGG

>c7547\_g1\_i1\_len=544  
GTTCAACTTTGCCGACTTTCTCGAACATACATTCAAAATACGTTCCGGCTTCTTTTCATAATTTTACCTGTAGGCTTACGCTTCCAGAACCGATCAA  
AAAGTGCCATGTGTGCATAACACGATCGGGCGTCAAGGATCCCGGATGACGTGTCTTCAGATGTCTTGTGATATTAGGGTCTCTCTCTTTAA  
GAGCAGTTCTAAACCGGGTCAACTTTGGAATGGAGCTATTGAAAGCATATCCATCCATTTTCCAGATACAACATCGACTTTTCAGGACGAA  
TACAGTAATCTGTTTTGGTGTATTGTGCCAAGGGATACTTTGCATCAAAGACGTAGTGACTTTCCGAGCCACTGACGCGCTAGGTCGGTGGGGG  
TAGCTACCTGCCCATCAAACCTCAACTTCTTGTAGATAAGGAACTACTCCTTCTGGAATAGCTCTCTCAAGCGGATACGCTCTCTAACCGGAGAG  
CGGTTGATAAACGTTTTGAAATCGATAAATAATGGTCGCTCATGTGCTGGAATGTGTAATATTG

>c27686\_g1\_i1\_len=615

GGGTCCCAGTGAAGACGTTGACCATATGCACCGCGTACAGCAGTATGCTTTCGTCTGTAATGCGATATTGGCTGATAGTTGATATAACATCGAAC  
CGGGGGGAGATGAGTTCCTCTTTCTTGGCAGCAGCAGTGTGTACATAGACTGAAGTCTTTTTTCGAGCTGGTCGACAGTCTGTACGTATCACCT  
TTC AAGATCTCTTCATCAGATGGACGGGAGCCATCAGACTTTGACTTAACATGGTATCGGTTACCATTATGTTCGATCTGTGTGTTAGCGGCAATA  
GCACGTTTGGCAGAGGAGATAAAACCGCGGTGGTCTGCAATCTTCTTGATCAGTTCAAGTTTGGTTTCAGAACCTTCGTTGGTTACCGGGGCTTCA  
TCTACACCAATATGTGGCAGTAGGGTTTGGCGCTTTCGCTTCAACGGCTTCCCAACTAGCGGGCCAGTCATAAAGTGTGCAACGTGAGG  
AGGGCATCAACATCTCGAGGGTCCGACAGGTATCGGTGTAAGGGAGAATACCATCTGGAATGTATGTTACTCTGAGTTTATCATCATCGACGCGA  
CCTATGTTGGCAAGACCGACCATAGAGGTTGAAATACG

>c28765\_g1\_i1\_len=401  
GACAAGCCTCACTTTCATTTCTAATGAGAGAAAAGTTCCTTAAATGGAATGTGTTGGCAGGCAAAGGCCTAGTACGTACCGTACTGTTCTGTGG  
GAGCGCATGTTTTATTGACGCTGTATATACCGGACAGTATACCTCAGCCAGTTCGACAGTGTATCGGTTCGACATAGAAAGTCGACCGCGGT  
CGTAGGGGAGGGTGGATCCTTGGAGCAGTAGAGCTAGAATCCAGGTGACAGGAGCTATCGAAGACTTTGGCATTTTACAAAAACGTCAGATTGAT  
TGACAGTCTCGACGGAAGAACCCAGGCATCGGTACCTGTAGTCTCGACGGGCATGGAAGACTGAACATAGCGACGGGAGAGAGAATCTCTAACA  
TCTGTTCACTCTAAC

>c35315\_g1\_i1\_len=396  
ATGTATGTTGAGAAAAGTCGGCAAGGTTGAACCTATTGATTCAACTTTGAAGGTTGGCACAAGATTTACCCCATTTGACATGTATCATCCCC  
CGGCTTGGCACTTCGTAGGGAGTACCCATACACAAGGCGAATGTCTTGGTACATCTATGACAAAAGCAAAAAGATTGAACCCACTTCGCTAAATTCCT  
AGCCCGCAAAGGTCGCTGCTCCTTGTATGATCGCTCCGTCAGGTCCTACTGCGAGCTGATGAACATAGATCAGAAGTCAAGCTCGAGG  
AGTCTGGGCATACCAGCAGAAGTCAAAGTTATTGAGATGCGTTATTGTCATCCCGCTTTTAGAACGCTCTGTCTCACTGCTTCGGCAAGATACCTTA  
CCCTGTTGGAAG

>c43767\_g1\_i1\_len=338  
ACACATTTCTGTCAACACCATGACCAACGTTAAACAACAAGAAAACCGATGTTGAGGATAGCGCCTCAGCCCCGCTTCCGATGTACAGGTAGCTAA  
GGATAATGCTAAGCCCAAGGCTCCGAGAAATCCAACAAGGTTGAAAGAATAGTGGCCCCAAGCCCAACACCAGTACCGTCTTCGGCAACAGAA  
ACGTTCAAATTCGCAAAACCCCGGCTTTGCGGAAGGTAATTCAGATTGAAATGCCACGGGTTAAGTGTCTCTGGAAGAAAGAACGTTTTTGAC  
GCCGTTAAGACGGAATACTTTCATCTTGTACAGGATTCGTTGGCGT

>c3606\_g1\_i1\_len=492  
CTGAATACAAAGATCTCGAGCCATCGTTTCTGGTCTTGGAAAACCCCTTCTCAGGACATGGGTAACAACGTTGGTAGAACTCCATGAATTCAC  
AGAAAACCGCTCCACATGGCCCCACTAGCCACAGGCCGATCAGTCCGGTAAAAGAAACGTCACGTAACACGCTGGACTCTGGGTACAGAA  
ACGCTTGAACCACTCCACGCTGTACGGTGAAGTCTATCATCGGTAATGTTTGGTCCGAGGAGTTGAATTCACGCGGCTTTTTGTCTTTTCGC  
ACTTTTCAGGGTGCATCCCATTTCCGTTGGTTCGCGCTCTCGTCCGCTTGCAGTAGATCAAACGCTCATCGGAGCGAAAGCACTGTCATCAC  
CCAACACCTTCAGGTTTCGGATCTCTACAGCCTGGCAGTTCGCAAAATAATCTATCAGAATGAAGTTGATCACTGAGTCAATCATTGCGTCCACC  
AGGATCCGGAAG

>c17358\_g1\_i1\_len=983  
CTGAGGTTTTGGAGGAGTACCTAGAACCTTCTGCCAATGAGAGCAAACCTAGCGCTCGAAGCTAACCCGATGCGGTGCTTACGACGAGTGGGAGG  
ATGTTGTTCTCTCAGCGGCGGCTACCGGTCGTGCAAGAAGTGGTAAAATTTACGAGGAGTTGGGAATGACTCGTTTACGCTGAAGAAGTTC  
CCAGCACATAGATGAGTCCGCTGCTCCGGCTGCCGACGAAATGTTTCCGTCGCGAGTAAAGCCCTGTCGACGAATTAGCTTCAAGACAATAC  
AGAACTTGAGAAATCTTGTGCAAGTTTTGTTTGCCTCGTTTCGAACAGAAAGCTCGACCAGTGGAAACAGGCTAGGTTCCGACCAGTTGCTGTG  
ATGTTGAGCATTTGGGTAAGTTCAGACGAGCCCTTAGGCAAAATATCGAAAAGGGATGGGACCGACAACGTTGCCCTTTTATTCCAAACCGAAATG  
CTACCCGGCGTTACCGGAGGAAAGAGGTTGTAATGGAACGTTGGAAGAATTTCCGGCGAATGCCGTTACGAGCTAGTGTTCATCGGGCAAC  
CCAGATTTGTTACTCTTTACTCTGCGGAGAACACACGAAAGACTCCGCTCCGTTGCATTACTCGTTATACGACATGTTGAAGAGGCGAGGGTGGCTGT  
TGGTAGGCGAACCGACCGACAGCAGCTCAAGGCTCACAGGCGTAACCTTCTGAGTTTTGATTATTTCTCCGCGACCGATAATATTAAGCGGG  
AGTACGTGAAGGTAGCAGTTGAGTACTAGAAGAACAGGCGGACCATCTTTCGGATGATGAGATCCAGGCACTACGGGTGCTATCGAATCTGGTGA  
TTGATGGCAGGAGACATTTTCGGCCAAACCCATGGGTCAGTTATGCTTTTTCCACTGCTTTGCGTGATCAACAAGACCGTAGTTGACATGGCAT  
TGGCCGAATGTTAGACAGGAAG

>c9501\_g1\_i1\_len=6086  
CCGACCTAAGTGTGCTCTTTAGGCGGGTGCATTTATCCCGTGCACCGCTTACCCTTCCGGGTCGAAGGTTTGGCCGGACATCGTCTCACTGGG  
TGCCCGTGTCCAGTGTGACTCACGCACTATGCAATACTGTACGATAACACAAGTACTCCCTAGCGACTGACATGGCAAGTGAATTTAGTGCCTGACA  
AGGTCAACCGTCTGCAGATGTGCAAGAGCCCGTGTGATCTAACCATGTATCTTGTAAAGGATGCACTATACCTGTTGTCCAAAAATAACTAT  
TTGGCAGATATGTTATCCGGAACAAGATGTGCTTAATCTACTCATAAAATACGCGCTTCTCCTCATATACATTTGGATACATACCATCGTTGA  
ACAGCTCTTATCGACTAGCCCCACTGAGTTATCGTATACAGTCTGACCCTTCAGAGTTACGGTAGTGCAGAAACAAAGCAAGAATTTGCTTGA  
ATGATGCAATCTTCTAATGGTTAAACCTGATACTGTGATAAGCCGTTGAAACCGCACTAGCCGATATCCAAAGAAATGTTACATACGATG  
TTTTACATCTAAAACCGGTTTGGGGCTTCCAGCAGGAACAACCCAGTAGTGAAGAAACTGGCGTTTATATGGCATGCGGTGTTCCAGGCT  
CGGATGCTGGTATTTCCGCGTCCAGGACACATCCATGAATTCGACATATCCTAGACCCCGGCAATTTGTCCGTTGTTTAAACAACCTGCTGT  
ACTGTTTCTTCTGAGGCTGCCTCCAACCTGACCGAGTCTGCTCGTGCATAATCTATGCACATTTGCACGATGGAGGTGTCATTTCAAACACA  
TAGCCATTTGCTCGCCAGAGCCATCCACTTCGAGTGTACTGTTGCGATGGAACCTCTCGAACTGCTGTCAAGCAAGGATTTAGATATATTTG  
ATCTCACTGTTCTAGCGGATATGCTGATATATACCGGACCGTATCTGTATTTCAAAAACCTCGCCACATCCGAAACTGTTGCTTGTAGAGGGT  
TTGTTGTTATCCAAATCTTTCACATATGCTACATATCGTTGCGACATTAAGTACCTATTCGACATCATGATATATCATCTCCTGTACAACT  
TTTTCATGTCGACATTCAGCCTCTGATTTATGATGCACACAGAAGATCTGATTTTCACTCGACCCTATTAACGACGTCATTTCCATCCACTTAGTA  
TGCCACCTTCATCTAAGTGTGTTTGTATCGAATTCACCAACAAGTACTGATCTCTTCAATCTCGGCATCAATCAAGGATCAAGCTCGAGAT  
CAAGGTGATAAGGTGCCAAACTGTTCTTCCAGTGTCTCAACAAGAACAGTATGAACGTTTGAACAACAATGGTCAAATTTGGAAGCATCAACAC  
ATATGTAGTATTCGTATCTGATGAGCCAGTGTGTTGATGTTCAATGGATCCAAATGGTACTATCTAAGAATATAGGGTCAACCAAGACATACA  
ACAAGTAACTAGCAGGAGTGCCTCGCCATCGGAGTAGTGTACTGCTCCGCTTGGCTTCTTCTTTAGCGCCACCCCTCGCTATCCGTTGGCA  
TTTTACAGCCCTTTCATACACATCACGACCATTCAACAACCTGTTCAAATCCCCAGCCCAATTTTTGCTTCAAGTTGAAGTCAAGCTCCAGCCGACTT  
CAAAGTTGCTACGCGGCCACCACCAGAGGTGGCCCACTTGTTCAGTCCGCACAAAAACCTTGAAGCTCACCCTAGTTGTGCGGAGCTTGGCCG  
AACACCAAGCGCCAAACCTTTTACAACCTAACTCCTCCTTAATCTCATCGCATAGGATGCTGTGTTGTTTTCGTCTTCTCAGAAACCCACTCGC  
TTACTATCATACAGAGTCCCGTACTCCAGGAGCGTGGTCTCCGATGGTTGAGAGTCCGTTGGAAACAGGATAACACGTAACATATCGGGGTGCG  
ACCGCTACAAGAGTGAACACACTTTGTTCCAGCCAGGATGTTGCGGATAGCGTCACTCGACAAAAAGGCGAGGATTTGATGTAATGT  
GTGAAATGCGATCGTTTATTAGAGAGGATAAGTGTGTTGCTAATGGGCTGTGTCATCAACGAGAAGTACGCGGAGAGGCCATACGTGAAGACTGATC  
CTATATCCGCATCCCTGTGAACATCTGTGATCTACGTAAGACAGCAATGAATGATACCTATAAATTTGGCATCAGCCATGCTCACTTGGCTAGT  
CGCTCACTTTTGAACGAGGACCTTCTTGGCGCTTGAACATAAGGTGCAAAATTTGAGGATGCAACCCCAACATTTGGGTGTGCTGGAAATTTTG  
AACCGCACTCAACCGCCCAACTTACCACACATCTAGGTTCAATTTTCGCTCAAATCGATGCGGTTGCAATCTGAAGACGCTTAAACATCTA  
CTCCCTTACTGTAATATATTTTTTGGAGCAGCTCATGGCTCAGTTAACATATCGACGGGCTGCTAGTACCCACTGACGATGCAACGTCGGA

ATTTTCGAATTTTTCTTCCACCTAACCTACATTAGACCTAGGACCACAAAGTCCGATAAATACTACGCCATCCCTCTAGACTTGAGCGGAATGTGT  
CTAATACTAAAGGTGTGCGCCGACCCACACTAAGATATTTATGATCTATTTCTACGCGTTCACCGCAACATTTCTCACACTCAGATTGTATCACAG  
ACACCACATCTAACACCCGCTCGACCTGAGTATCTACTACACTACACCGGATGATACACTACACTCGCATCCAGGATCTTTGATCGAGTGTATC  
TTGGAATGCTGTCAGCCAGCCTGCGTGAATACTACTTAAGAAGAACAAGCGGTTTTTTTTGCTCTCTGAAAGCGCACAGATGACAAAATTCAT  
CTCTTGCCCTCCGTTTACCAGCCAGTGTGGAAGCTGGTCCCATCCGTACAGCCGGCAACGAATTTCCGCTTGCCGCTACCTTCGAGCTTATCTG  
AAAGCGCAGACCGGCTTTAACCCAGTGTGATGCCACAGATCCAATGGCTCCGAGCACATCACCACGTAGTAAGTGGCGTGTGGCAACCGCGG  
CCTCACTTTTCAAGTCACTCCCAACATCACGCATCCAACCTGAGGAGGATCAGGATACCCATGCTCACCAGAGCATTTAAACAGTATGATGCGCAG  
GTATGTTGGTCAATCCGACAATGTATGCTCAGTGGTCTGTCTGGGTTGTGACTTGTGCAAGACGAGGCATTGGTAAAGCTTGTGGCTCACACA  
TCACCAACTCCACGGACCCGAGCGCCATGTTGTTTCATGTCGTCTAAGAACACATACCGCATCCAGCCGATCCTTCCCGTTTTAGGGAAACCAT  
TCCATCTTCCGGGTAGGTATATTTGAGGATGTGCTTTATCCCAACCGGCAGCTGCCACATTTATAAGCTCTCATTTCCGCAAGCGCGGGAAACTCAC  
GCCAGTCAGCATCCTTAGAGGTGAACCTAAACGCTAGAGCACAGCCCATAGTGTCTTCTGCGGCATCCCTATCAGTGAATCATACAATG  
AATAAGGGCGTAGTGGCTTCTCTTTAAGCGCGTCCACTGGCCAACTTTTTCCACGCACATGTGTATGAACCACCAGGGCCACATGAAGTGTGGGCC  
ACATCTTCACTCTGCGTACAGTAACCATCCCGGTGATGATTTAAGTGGGAAATAAAACCTGTGGAGAGACTGTACTTATTTGTGGTCCGCTAG  
TATTAATAAGAACCCAGATGTTATTTAGTTCACAAGATGGCACTATAGTTATCTACCACACACAGCCGGATGACGCATACAATCCATTCAAAT  
CCATGATGTTTCAAGTCACTCACACTATCCATCCATCCATCCACAGCAGCCGCTCCGACTGAAGACCGTCCGACTGAAGAGATAAGTGAAG  
TGTTCACCTCGTACTCACACAATCGATCTCTGAAGCAACACACTCTCGTACACACGCATTGGACCCGAGGTTTGGCTTACACCATAACCAG  
TCACACGCTTAAACAATACTATACAATGCAAACTCGAGTTCTTCTCTCTGTCGCTCCGTCATTGTTATCGCACTGGAAGAGTGGTCCATAA  
GCTTACCTGTGGGTGTAACACACAGTCAACGTCACCCAGTCCAGCCAGCCGACATTTGGCTCCCATCTTTCGAGATCCGCTTCTGTTTTAT  
CAAGCAAAATAGTCCAAATGTCAAATCTTCCACACAGCAGCCGCAACACAGCCTCTGCTCCTCAGGACCCGACTGCTGCTGCTGCTGCTGCTG  
AAGCTAATTTCTGAACCATCGATAGCAGGTTCCCATGTCCTCTGACAGAGCAGTTGCTTGCACATTTCTCTTACTGCCATCAGCATTTGTGTGAG  
GGTCTGGTCCAAATCCGTTCTCAGTGAAGCCAGATATGTAACACCTTCTTGTAAAATCAGCGATCTTGGTCTCGAATTTGATCGCATCTCCAA  
GGTGAGGCACACTGAATCTGGTTGACATATAGTCTCTGGTGCACAACACTATGGCGATCTTCTTCCATTCGCGGGGACATAGACACAGCTGG  
CAGTGTCTAGTGGTTTTGATGACAAAATTTGATTTCCGAAGTGGACTCTGGGTCTGAAGAGAATCGTACTCTCCGACTGCTCCGAGCCGCAATTC  
ACCAAAATGGTGAAGTGTGGCGCATCAAAAAGCCATAAAACCAATTTCTGTTCAAGGTTGTGACTCTCGATGGCGACGATCTCAGCCCAAGATG  
TGAACCCAGTTAACCTGTCTATTGTTATTGGGTTTAGCACATAACGCATTTACGTACGTGCTGAGGGGACAGATGCGCACGTCACATTCGGCGCAGC  
CAGCGGAAATCTGGATGGTATTGTCCAATACTCCTCTCTGGTCAACGGGTGAAGTGTCTTGTGCACTTTCCCTGGTAAGCTCCTAGCCTGAGCA  
TCTTGATGTGTTCGATCGTACCCGGGTGATCCAGCGGCAAGAAGTGAAGAACATTAACATTCGAAGCAGGGGTGCTCTCATCTCTGGCTA  
AAGTATGCAATCAGCTCCGTTGATGATCAAGTGGTGGTCCGACTCGCATTTAGATTGACGCTTCCCTGTTAGGATCAAAATACGATCTGATAG  
AGGCATCCACCGCGTAAGTACTGCTTTGACCACAGTTTGTCTCTGTCTGACAGCTCGGGAGGTTCTGCTCCCGCTCGCATCGTCCAGATA  
CCGATACAATATGCCCGGCCACCTGTATACGCTCGACGTTGTGTTCTACGTCAGCGAGCCTCCACTTGTATCCTATGACATATAAGGGGTACGCGA  
TACTGCGGACTGAGCATATCAGCATGAGAGCGTAAGTACGCGCAGCACCATGACTCTCCAATGCCCGCACCTTAGTGTCCGCACTTCCAGGTA  
TTCGACGGTTCCAAATGGACCCAGTCCCTCCCTCAACCAATCTGACGAACTCTGACGAACTCGCTGGTGTATCTGACGCCGCTAGCCGAC  
CCGGTACAACCTTCTCGCTTCGAGACATGTTGAGGAAAGTGTATGTTGACGCTGAGTTAGCTATTTGTTCTACCTGGTCTGCGCTGTATGA  
CTGTTCTGAAGCCGAGTTTTGCTCACTCCTCTCAGTCACTGTTCTGGTTTTTTCAGTGTAGTGGGGTGCATAAAAGGATCAGACTTCTCAACTA  
GTGTAAGCCCGTCTCTCTGTTCCAATATAAGCACCTCAGAACAACCTATGATCTCTCGAAAGAAATCCGGAAGAAACAATATTGCGTTTCA  
ATGTCAGCTCAGTATGACAGGTAACGTTGCGCCCTGAACCAATCTTGTATCTGATGTTTTATGCTTGTATTTATTTCTCTGTAATTTGCTC  
CTTTGATCTCACTTACCGTATTTTAATTTGTTGGCCGG

>c51916\_g1\_i1\_len=482

GCCAATGTTTCGGTTTCTCGAGAACGATTTCTCCAAGTATGATAAATCTCAGACGGAGATGTGTGTACGCTTGGAGCAATTTGTTAATGAGAAGCTT  
GGTTTTGACCTGGACTTGTGGCAAAGTGGTATGCTGGTACAGGCAAAGCACTATTATAGTGTTCACAAGCCTTGAGGATGAGATTGACTGG  
CAGCGCCGCTCGGGTGGTGGCAACACCGCGTTTGGCAACGTCACCGTTAATTTGCTCAGCAGCGCTTTCGCGTATCGTGGGACGCAAGTGAAGCA  
GCAGCGTACATCGGTGACGACTCTTAATCATGACCGATTTGGTCTCTGCTCAGCAAAATCAATTTGGAATGTTAAGTGAAGTGTACAATTTGCAG  
GCTAAATTTATTTATCTGATGATCCCTATTTCCGCTCGAATCTTCTGTTGTCGATAAAGGTTTCAGAGGCAAGCTATATTTGCCCTGATCCAAT  
AA

>c9499\_g1\_i1\_len=10684

AGGCATCTATGGTATAGAAAAGATAATCAAACCTCCCTAACGGTGGGAGGTTAAGATGAGTCTTTTCCCATACTTTTTTACATTAACGGAGGAG  
GTTTCGCTACCCCGGATTTCTCCCTGTTGCCCGTCCAGTTTTGAAAGCTCTGGATCGCTTGGCTGCCATTTTATAAGAGCACTGGTGCCATCCA  
GTTTTGTTTACAGGCTTCTCTTACCATTCCATGGGGGGATGCTTAAGACCATCAGCTAGCTAAATGATAAGATGGGCGCCACCACCATCTTAG  
ATCAGGTACTATGATCAGAGTTTTTGTAGGACGGAAGCGGGCACCTCCTACGGGGGTTACAAGTCCCTCCCTGTTACACAGGGGACTGAGG  
GAGCGGGTCCGTCACCGCCACAAATGTGCCCTGTCTGCAACGCTCCATAAAGGAACACACCTTGTGCCAGGGGACTCGGGGAGCGGGTTC  
GTCATGCCGACATTTTTCATGCTCCTGTGCGCGGGGATGCTGGTCTCTCAGCTCCTATTCGATTACGTTAGTATGACATCATTTCCTC  
TTCGATATCGACTCATAACTGAGAGCTCGTCTTGTAGGTGTTCCAGGACCCAGTTTCTGCGTTCGATATCCTCCGAAACGCTGATGACACTATTTT  
CAATCTCTGTCGCCACGTTGCGCGCTCTTTGACCCCAATCAGGCTTCCGAGGTTATGTCCTGTTTCTTGTGCAAGTGGGATGTCATCCAGG  
ATTCATTTGACTCTTGTTTAGCATCCACGGGTTGTTGTGACCCACAGCTCATTTCAAACCCGAAGCATGTCATCAGTGGTTCATCCACTCGTGAT  
ACTGGTGGACTGACCCAGTCTCTAGAGGAAACCAATTTGTTGGCAGCCGACAGGATAGCAATGAAACCTAGGCCGCTTAAATCAGCGCTGT  
GGAAAAATAACAATGCCACATCTGGGCATAGGCCCTTGGCATGCAAGCACTCTCCGATATGCTGACTACCCCTCCCTTTTGAATCGGCTACGAC  
CAAGCACTTCGTTCTCATGCTGACGGGTGCTATGAGGATCTGCGCTTCTCAGGCACATTTTCATGGTAATGGTGAAGCAAAAACCTCCACCTTTT  
CCCAATCGCTCTCCATCTGGAGGAGCTCCCTGTGGGACGTTCTTCCGGTTTTTCCCGTACGCTCGAGATATTCGAGAGCAGATGAGAAATCGC  
GATGTCCTGTCGACACAACAACCTGCTCTCCAGCAATGATGTTTCCGAGAGCTTCTTCAAGGTGTTTTTCCAAACCCAGCATCAACACAGGAT  
CATCCGCTGACGATGCTCTTCACTTTCTAAAACCTCGCTATCTGAACCTTACCGTGTGTTATGGTGTTCAGCGCATATGTGACCACTTGCCTG  
ACCCAGTTGGTCTCGACGGCCAACGACGTCATCACCGTCCCGTGCCTGATTTTGAAGTGTGTTCTGTTGGAAACATGGCCACAATGTTCTGATATG  
CCAGTCCGATGGTAGCCGCCATCAACGCTCTGTGGTGGGGGTTCCCGTGAAGGCTGTGTAAGAGCTTCTCATCTCCAGATCTCTCTACTAA  
TTTTGTGTGCCATCCAGCAATGCTGCTCCGCAAAAAGTATTTTCTCTGCTGGCAATGCTCTTCAAGTAGTACCCGAAATTAATGACACCAACGC  
CTCCAACCTCCCGAGGAAAGTGTCCCTACTGACCCAGTATCCGATTAAGGAAGCCTAGAGCCTCAAATTCAGGAACCCGGCTCCCAAGCCACA  
TATACCAGATGGTCTTGAAGCCCTGACCTACAGTAGGCTGGGCTTTTCTCTCTTTCGCCATGGTGTGTGATAGACATATTCACACTTCC  
CTTGACAGTGGAGGCGCTTCTTCCAAATGAGATCCCAAAACGACTGGTCTGAAATGGCTTCTGTACATCTCGCCATGGCACATCCCTGCTCC  
ACGATCCACAGCAGCTCATTTGCAACGTTGGTATGATTTCTTTGATAAAAACAGCAGGTTGTAAGTGTGCTTTGTAAGTGTGCTTTGAAAGCCGCTA  
GATGCTTTGTGATCGTCTGTTGACAGCCGATATGCTGTGGTGGGGGGGATGACAGTGTCCACCTTCTCCCTCAGCACCTTCTGCTGTGAGT  
AAGTTGACAGTCACTGTAAGAAAACCCACACTCGTGGGTTCTCCATGGCCACATGATCTTCTAACGAGGGGTTACCAGCTTGCCTC  
CCACCTTCACATCATCGGTGACAAACGATCCAAAATACTTGAACCTCTTGTAGGAGGTTGTTGATCTTCAAACATGTTCCACGGTTCTCGTTCA  
TTAAGCCTTCAACACGCTCATGTCGCTAGTGTCCATGCTGACACATGCTTCCGAGAGCTTCTTCAAGGTGTTTTCAGCCGCTGAGCCGCTGTTGGCA  
GGAGGACAACGCTGCTAAGTGTGCGGAGAAAGCGGGCCATTAAGCGGCCAGCGTCATGATGTTGGTGGCACCACGTTAGACCTAGCCCGGAGA  
TATAGTACAGCTCAGCCGAGCTATTCGACTGTGGGAGAGACGCCAACCTGCCATGTCAGATGTTGGAGGACTCGATTTTCGAGGAGACCT  
CAAGAGAATATGGTGAATGATTTGCACACAAAATGGGCTCCCGGTTCCGCAAGGCAATTTTCTAACAATTCGAAGACTTTAAGAGTCTG  
TCTTCTCTGATGTTGGGTCGGATCACTCTCCGATGTCACACATAAGTGTGTACACCGGATGAGGTTGAGCTATGACATCACTCCAGTTT  
TTAGCGTAGCCAGGTTATATCCCTCTGACGAAATGCTGAGGATTTCTTTTTTCTCCACCTATTTGTAACCCGAGAGCGGAGACACCGTTT

CCTCCATCACAGCTCGCTGGCTCCAGCCACCGCGCCACATCCCAAATCCACCCTCGACCCTCGGTCTCCATTCTGATTTTTGAGATGATTTTCAT  
TCAAATTTGAGGCCGCCACGAGACATAATCACCCCGCTCCGCTCATTACCCCGCGTGTATTTGATTTTTGTGAATGCATCTCCATCAAGAGCAT  
TCAGAGTCATCTTCCATTTCCATCCAGACCGATCGTGTGTACTTTTTCCAGAGCTCGAAACTGGTTGAAGGGTACCCGCGCCAAAGCTCTAG  
CGGCAATGTGCATGAACCTATAAAAAAGGTAGTTTCTAGCAACCCTATGGCAGACACCATGGAGCCAAAATCCATGCATCATGGATCTTTG  
ACCGGGGATGGAGAAATTTGCCACATGCTAGCCCCGACCACCAATGACCCTCGGAGGAAATCTCCAGGAGACCGTGTGCAGAAAGCCAAAAGAGGC  
TGAAGATCAAGCAGAAGGCATACATGATGGACCGAGTGTTCGAGTGGCACTCTACTAGTGTATTTAGTGGGACGATCATGTCTGTGGTCCGCGAG  
CAGCTTTCAGAGCTCCAATGAGGTCCGCCACGTATGTCCGGGAACATTCGCATCTCCCAAGCCAGCACTCCGCGAGATCCAGCATGATCTTAAGATGA  
CCCCTTTACCAAATCGCTGTCCATGTAACCTGCGATTTCCAATTGACTTGTACAATACTGGGTACACCAAGAACATAGCCAGTGATATGACGACGC  
AGAACCCCAAGGGAACTCCCATATAATAAAGGAGGCTAGGGGTGCACACCAAGACACCACCGCTAAGAGGGTCACTAGATGGCATTFTGTTCAATAG  
TTACCTTTCCGCGGCTAAACAAGGAGAATAGGAAACACAATGCCAGACACGCGATGAAACAGGAGAGCACAATTTGAGACGCCCAAGACAAAAGGCCA  
CTGCACAGCTTCAAGAGTTCGTTGTGGAGCTCAGTTGTGGACCGTCCATTTCCATGACGTCAAAATCCAGAGCAGATGAGCTTCTCTCTCC  
ATATATCGGTCCAATCAATCAATGTGAAAACTCATAGAGGCTAGGCCCCCCCGCGCAGTTCATGTAGAAATCAATGGACACCTTTCCGCTCTCCC  
ACTCAATGTCTCAAGCGGTTCATCAACGTATTGTGGTGCATACCTTGTGTGCAAAATCGGTTTTTCGATGATCTTTCCGGTTCCTTCGCCTTGAA  
ACAGGGCTGAGTCCGCTCGTCTCCAGCTTCTGCCAGTGCACGCCAACAGCATGGGAACGTCATCCCGTCCATAAGCTTTGAAAATCGCATTC  
TATCCCTAGCCAGTAGGTTCCCTCCCGGGGGTGGCTTCCCTAGCATAAAAGTACATGCCAGGATCCAGGATCAGTCTTTGGG  
CTTCAGGCCAACACCCATGACACTGGATTTTCTCCGTTTGGTATCAATAGGATACACATACGTTCTCCGTTCCCGTCTACCCGCTCTCCCTC  
TCCCTGGATCATGGATGATGTGGTTATGTTCGTTCAACCAGCTTCACACGCGTGGCAGAATCTACAAGGGTCCGCAACGCTCTTCGAGTGTCTA  
TAAACAGATCGACGCCAAATTCGCTCCCATTTCTGAGATGTCCGTTGGAGATACAGAGGCGGTGGTGCATCACCTGCTTGTGCATGATTTAGTGG  
AAAAGTTTGTCTCGATGGTGAATCTCCCGGGGGTGGCTTCCCTAGCATAAAAGTACATGCCAGGATCCAGGATCAGTCTTTGGG  
CTTCAGGCCAACACCCATGACACTGGATTTTCTCCGTTTGGTATCAATAGGATACACATACGTTCTCCGTTCCCGTCTACCCGCTCTCCCTC  
TCCCTGGATCATGGATGATGTGGTTATGTTCGTTCAACCAGCTTCACACGCGTGGCAGAATCTACAAGGGTCCGCAACGCTCTTCGAGTGTCTA  
TAAACAGATCGACGCCAAATTCGCTCCCATTTCTGAGATGTCCGTTGGAGATACAGAGGCGGTGGTGCATCACCTGCTTGTGCATGATTTAGTGG  
AAAAGTTTGTCTCGATGGTGAATCTCCCGGGGGTGGCTTCCCTAGCATAAAAGTACATGCCAGGATCCAGGATCAGTCTTTGGG  
CTTCAGGCCAACACCCATGACACTGGATTTTCTCCGTTTGGTATCAATAGGATACACATACGTTCTCCGTTCCCGTCTACCCGCTCTCCCTC  
TCCCTGGATCATGGATGATGTGGTTATGTTCGTTCAACCAGCTTCACACGCGTGGCAGAATCTACAAGGGTCCGCAACGCTCTTCGAGTGTCTA  
TAAACAGATCGACGCCAAATTCGCTCCCATTTCTGAGATGTCCGTTGGAGATACAGAGGCGGTGGTGCATCACCTGCTTGTGCATGATTTAGTGG  
AAAAGTTTGTCTCGATGGTGAATCTCCCGGGGGTGGCTTCCCTAGCATAAAAGTACATGCCAGGATCCAGGATCAGTCTTTGGG  
CTTCAGGCCAACACCCATGACACTGGATTTTCTCCGTTTGGTATCAATAGGATACACATACGTTCTCCGTTCCCGTCTACCCGCTCTCCCTC  
CCCCACGGATTTTTGAACTTTCCAATCCACGCTGGACTCAACCAAGTTGGGAAGCTAATGGATTGGTCACTTATTTGCATTAATTCAGGCTGTAT  
CAGGCGCGTGGCCGGTGGTGTGACTAAGGTAATCAATTTTGTTCCTGGCTGTGGAGATGTTCCATGATCCCGCGCGCAGCAATGGACATTG  
GATCCATGAAATGGCACTCATCCATGATGATCATGGCAACCCGCACTTTCTTGGCCCATGGTAAAGAACAAATTTCTGTGAACGTTGCGTGCATG  
CAACCGTTATCAGATCTCTGGTGCAGTACGATAGTGTCTTATCACTCTCATGCTGATCTTCTTCAAGGCTCAACGACCTCAGCCATCAGCCACC  
GGTGGGTGTAAAGTCAAGTCCGTTGGTGGAGTCAATGTTCTTGTGTTCTTCGACAATAACCTTTGCGCGTCTTTCTCTTTCTTCTGGATGCC  
ATGTCAGAACCGCTGGTCAATCACAGTTCAGTTCCTCCGTCACATCGGTTGGTTTTCCACCTGCTACTGTTGAGCGATAAATTCGGTTCACAT  
AGAACCCAAACCATAGAACCCGACGGGCTCACCATTAATGAAAGACGGTGAAGCAGAAAGATCTTTTCCGAAATCATCAATGAACATGACAG  
GTTACCGTCAACTACTGACTCCCGGCTGTACCAGTGGTACTCAATGGTCTTGTCCGTTTGGCAAGCCATCAGCAGGCTCTCCGTTAGTAG  
TGGGGTGTCAAATGCCAAGGTCACCATACGATACCAGTCCGCGAGGCACTCCAGAGTGGGAACGACAATTCGCCACCCGCAATTTAATG  
GTTACCTCGGTTGACGTGCATGAGAGTGTGGAACACCCATTTTTCGAAAAGCCAGCCACGTTGCCGTTGCCAAATAAGCTGCGAACACGA  
TGGGATACACTCCATTTGGGAATGTCTTGAAGCTGGTCTGGAGATCAGTTTCAATGGTCCGCGAGTCCCAAGAGATCATCAGATCGGTTGTAG  
CAGCGAGCTTCATACCGCAGCATCCGATTTATGGTACGGGAAGGTTAGTGTGGTGGCATGAGCAGGTAGAGTGCCTCCCAAAAGTATGAAGTGG  
ACGTTACGGCAAGCTGAGGAGAACAAATACGAGCTCCGGTACGAGCTAGGCGCCAGCAGTGGAGCCGCCCCACGACCCCAATCCCATAGC  
GCCCTTTAAGTCAGGAATATTTATCCGCTCATCAATTTCCGTTGACACTCCTTCCGGAGTCTCTCCAGCTGAGATGAACCAAGCTCCATACTGA  
CGTTCGCTGTTCCATGTAAGAAAGAGCCTATCATTTGAAAGGCTAGGACAGCTGCCACCGTGGTGGTGGAGTCTTCTCCGCGCCAGATTC  
CCCCAGCTCGCCAAAGTACAGTCCAAACCAATAAATTCGCGCCAGATCTCTGTAGCCGTTCCCTCGGATTTGTGATATGACATGCGTACCTGT  
ACATAGCGTCAAATCGAGTCAAGATCAAGAACCGAACCGTACCGGAGACAGGCGCTCTCCACCCCATATCAGGCTGGAACATGAACTCTGGGG  
GGAGAGCTGCAGGACGCTCTTGTAGGCGCTCAGCAGGACCACCGAAGCCATGAGTTCAGGAGACCGTAGAGATATTTCTGATAGCGATCGACGG  
CGGAGAACAGGAATGTACGCACATCAGAGTCCACAGGTTGGTGGACCCCTAGCACTATTGAGAGTTCCTTCTGATCATGTACCCCAACAGAGGA  
CTGCTGAGCTCCAGTCTGTAGTATGATCCAGAGATTCATCAATAGATCTTGGGTTGGCATGATGAGGAGCCACTAGCAACACCCCAAGCAGACA  
GCCCCAGCATGAAAACAATTTGGGAGTCCAAAGACCGCTCCGTTAGCTAGAAATCGTCAAGAAATAGACGAGTGTAGTGTGATTTCTGGCC  
CGATAAGCTGCAATGAGATGGCGAGGCACAGGAGATTTAGGAGGGAGCGGTCGAACCCAACTCCTGCACGTTGGGCTCCCCCTCCGAAATCCGATT  
GAGGTTCCGCTTCCGCTCTCTCTCAATATGTCGTCACACTGTTGGTTCCTGGTTCCTCCGCGATCGGTTCCCTCAAAATATTTGAAATTCGGCTCTG  
ACGCTCAGACTGGTTCCAAGTTGGATCTCCATGGGATAATATAGGAGGTCACCGACTCGAAAGTGGACTATTTCTGTACATGACTGGCAACACC  
AAGTTCCGTCATTCGTTCCATTTACCTGTGCGTCAATTCGCTTCCGCTTCCGCTAGCATGAGTCCACCTTGACCTTTCTGACGAGGATGGCTCTA  
TGAGAGTGTGTCATAACGTTCCACGAAAGTCAATTTGTGCTTGTACCCGATTAATGTTGGTTCCTCGGAGATTTGGTCCCCCAAGCAGGTG  
GAATAAATAAAGCTTGGTCTGAAGGTCATGAGCGTGTCTGGGTTGATTCCTGGGCCACACAGCGGTGTGATTTGACGCATCTCGAGTGATG  
TAATCTGGGCACTCCATCAACACTGTGCTTTCCATCCAAACATGCGGTGATGACAGTTCGGCCATTTCTCAGCAACAGCCCGCCAGGT  
ACGTGGGACATTCGGTCGATGAGTTCCTTTGAGACCTCAACCTGAACGTTTGGACCATCAGCCGCTCGCCGGAAGCCGTAACACTGAAATGGAAAG  
AGACGGCTTTTCCGAGAGTCCGCAATATCCGGCCGCGATGCGACAATCCGGATAACCTTATCAGCCTCTTTTCCGGATAGCTTCCAAACATTG  
TTGGTAGATGCCCCAGATCACCTCAGCGCTCCATGTGCAACGTAAGATGAGAAGTGTACTGAATAGGTTAATGGTGAAGCAATGTTCTCT  
TTGGTGTTCGGGAACTTGAATGATCAGTGCCTTACATACACTGTTTCCGATGATGAGGACCCATCGACCCCAACAGCAGAGAAGCAGCTGTC  
GCAGGGCCAGCTGCAAACTCCTCACAATCAAGAGGTTTCTGGTTCAGCTAAACATATCTTTATGATAGTCAAGTCAAGTCAAGTCAAGTCAAT  
CTTCAAGTTCACAGCATGATCATTTGAAATGCCAACGCCAAGTGTTCACACAAAAGCGCGCTACCGCACGAGATGGTTTTTCTCGTGGTGT  
CAATTCACACCCAGATCAGCCGACATAGTAAAATACCCCTTAAACCAATAGAAAGGCTATGCGTTTGTCAATCAGGCAGCGAGGACGA  
AAATGACCAGGAGGTTGTGTTGGAGAAGAAGGCACCAACCGAAACTTTCCAACAGATCCTGCCACACCCCGCAACACCAGACACGCCAAACC  
TCTCGTACGATCTACCAGTGTCCGAGCCAGGCGCATCCTTGGCAGATAGGGTTAAGAGCACACTCAATAGAAACTGAAAGTCTCCCAACGAGCA  
AGGTGCTTGTATGATTTCCCGCACTTGACAAATGCCCGAGAAGTGGTCTTCCCTGCGAGAAGATCATTTTTGTGGATTGCAACAGACAACCGTGGC  
ACGTTAAGCTAAGCGAACGCTCTCATTAGAAAGCGGTGAGGGTAGTTATCACCCTCCACTATACCCGAAGCGCTCTTGGGAAATGTGGATG  
TTTTTGGGCTGGACAGTCTGAAAAGCTCCACTGACTAGTTTGTGCGAGCATAACTGACAAAACAAGGAGATGTCACGGAATCCATCATGGGTTG  
CGATCGGCTCTCCAGGACAACGAAGTTCAATTAAGTTCCTTTACTAGAACTCATTTGGACCTAGCATCTCCCCACACAACACTTTCTCCATGC  
CGTCCGACCACTAGCGGTAGAGTGCACGCCAGGCAACTGTCAACTTGGAGCCGAAAACAGCCCTCGTGAGAGCTTCCCGTACGCTGATAGT  
AATCAAGCAGCACTGCTCGGACTCCAACCTGCAGGTCTTCCGCGGTTTTCCGAGTTTCGCAAACTTAAATGTAAGCGGTAATGTCGCCAACCATCT  
GTTGTGTGTCGCTAACAGAGTGAAGCTAGCCGTAACGTTACATAACAATGGCTGACCTAGCGATAGAAGAAAGCTTGAATCTCTGTGCAATGGA  
GTTGACGACGCTTCCAGCAATCCCAATCCCTTGAACACCCAGTGCACCCAGCCGTTGATGGTTGGTGGAGTATGGTGGAGTCAAGTCTCTCTGG  
CCATGATGTCAGCCATGTTGAGTGCAGTCCACCGGGACACAGCTCAGTCAATAGGATGCGTTGACGTTGGCAGTCTGCGAGCACTCGCGCAGCC  
ATTGCCCCCATAGATCTCCGCGGCTCCTGTTTTAACTCGAGAAGACCGTTTGGCGTGGCCACGACGTACCCCTTCTCCGCTCTCACAATGGTCT  
GTAGCATGGTCACTGTTCCGCTTTCAGCGTGTATAACGGTTCACAACCTCCCTTTACTGTGGTCCAAGTGGCAATGCCAAGAAATCACAA  
CCCAGTGGGCCAACGCTTCCGATTTGCCACACACAGTGGGCCAGATGAAATGTCTTATTTTCCGCAATGGTCTGAACGCAATGATCTCCA  
TTTTAGCTAGCAGATCCGCTTTCGGGGTTACGTTGATCGCTTTTACGTTTCTTACGACGCATCTCCGATACCCCAATGTGAACCTAGTCCACG  
TTGATCCGCAATCCGTCGACTCGAGGTCCTTTGCCAAGTCACTACTTTTGGGCACTTCTTGTGACAAGAAATGCCACTCCAGCAACCATCAGCGG  
GTAACCTGAACAGATGCAAGTGTCTGTCGGTTCCTTCTTCAAAAATTTCCGTTGCCCTTAGCGGTGAAACTGGCATGCAATCACCACGC  
ATCCACATAACAGTGTGAAAGCCCAAGATGAAAGCTAGGCTCATAGGATTTCCCTGTGGTTCGCTGAGATTCAGAGCGGTTAACAGCTCCGAGATA  
ATGAGCGAATTCGCGGTCGATGGAGGCAACAGGCGATGAAGCACAATGCTATGTAATGAGGGCTTGGACGATGCTCTCTGCAAGAGGATC



CCCATCCAACCTCCAGCCTTCCTAACAGGCCAACACGCTGTCTTTCCCTGCCCTACGCCACTCTGGATGGGTGTTTTAGGGTCACCTGCCGAT  
TTGAGGGAGACTCCCTCCCTTTTCTTGTCTTTCTCTACCTTCTCTCCCCAGAACGGGGTGGAAAGATCTCTCCCTGGCGCTTTTCTCGCG  
CCTCTAAATCCTTCTTCTTCCCTTCCGCGGGTCAACCTCACGGTCTCTCGGCAAAAATAAAAACAACCTTAAGCTTTGAAAATATAAGCGTAA  
CCAAAACCTGTGGTGTAGCTAAGCCGAAG

>c11413\_g1\_i1\_len=693

GATGACTGTGGCGAGGTATTACTCTCGACATGCAACGGCGCGAAGGTCCGGTTCGGCTTGGAGCTTCGTGTGGCCTAAAAGATGTATACAGACC  
GCTTATCAAGCGTTCGGTCCCTCCACCCCTTGGCACCACCCACTGGTACCCTGGAGCCCTTGGAGCTCCAGGAGTGGGTTAAGCGATATGACCGG  
CCAAAGCGCAAATGCTGGCTACTGCTCATGCTGATCTTGTTCATTCACACATGTTAACGAAACCGGATATGAACATTTGGAACCTTCGGCAAACCTG  
GAGACCACCACCAACGCAACCCACCCACGCAATATTTACCCACGTAAGGACCATGTCTTGTGCCTGTGGGCCCTTACGTTAGCGCTATCGAACAG  
GCGGCTAAGCAGCGACCGTATCTCGTCAAAGCCCTCAGCCCTAAGCAAAGGGATGAGCGTATGACTCCGTTGACATACTACGCCAGGCTCTTGAA  
CTGGATCACAGCCGCTTCGACAAGCACATTTCCGCCCAATTTCCGCGCCGTGGAGCGCACCCCTGCTTACAGACCCATTACTGGGTCTCACTAT  
TTATACCATCAGGCAGTGGATATGCTAACACGCACTAGAGGATTGAGCCGTACGGCACTAGGTATGCCATGCCAGGCACGCGCTTCGGGGCAG  
CGCATACATCCATATCTAAC

>c40769\_g1\_i1\_len=1259

GCACTCATGTGTCTGGAGGAAACGGGTACCATCGGCTATGCGTGGGATTAAGCAATTCACAGCGTTTTGGACCAACCAAAATCAGCGCAGAC  
CGCTAAAATCCAATACATCGGTCAAAATAGCTAAACATGACCTACACATACTACCCACAATCAGCTGACATGTGAGGCTGCCTGGATGGGTA  
GACATAATCCGGTTCATCTGAAAGGAATATAACGCCCTCATTTATTAGCTTCATAAAAACCAATAACCACCTTAAGAGTTTTGTCTCAAGGTGAAG  
TAATAAATAAATCAACTATCAGGAAATTCATCAATAATCAACCTCAGGATAAGCGCTGTAATAACATAAAAACCAATAAACCAACCAACCAAG  
GCAACATCATCACCTCCTTTATTAATAATAGAAAAAGTCAAATGCAACAGCTACCGAGCACCAAGACTCATAACAAGCTCGGAATCCAGGTATACAA  
TGGACACCGGTTGTTACACACTACCGATAGAGAAGGCTATCTATCGTAAGAACTACAACAAGATCATGAAATGTTACAACCAAGTATGAAATGGCCA  
CCATCGTTATAGACAATGCCAGCAGATATAACGATCCATACTACCTTTGCTGGCCATACAGCATTTGACGCCATGTTACGAATGACATGCTAA  
TGTTGTGCCACAAGATCTTAGCTACTTATAATGGTGTGATCTGAATGCAAGATGTTGGCTATGCAATGAAGAACAGGAGTTACACCCGTGACG  
GACAGTATTATAAGTGGAAAGGCACAATATGCAAGCGGTGACATCCACCAAGTCTGTACGGCTGCTTACTCAATTTATACATCCCTGAAACCTGCTT  
TAGATAGACTCCATGTAGGGAGGAGGAATGTAATGGTGAATGGAGATGATAGCATAGTCAATATAGAAATCGCGAGATAGGCGTAAGTTCACAATCA  
GGAAACTACTCGCTCTGCTGAAGGAATACAACATGGAAACGAAACTAGACATCGAAACAAGCGAATCTATCTGATGTCGAGTTTTGTAGGAGCAAGC  
TAAGAATAATGATGATGGTATAGCAATGTTCCGAATCGACAAAACAAGGCAGGAGCAGGTATACGGTATGACGCATAAGGTAGCGTCCATTTGACT  
ACAATGCTTACCAGCGGGATATAGCATATGCCAATATGACCCATACAGAATAACAAAAGAGAACAGTGTTCAGAACCTTGTATGAACACTATA  
GTCGATTAACA

>c18294\_g1\_i1\_len=339

CGGCCCTCGCGCGTCTTCCCTCCGCGGCCACCCGGGTCGCCGCTCCTTCCCTCCTCGCTCCTCCGACGGGTCGACCTGCAGCCCA  
AGCTTGTATTTCTATAGTGTACCTAAATCGTATGTGTATGATACATAAGGTTATGTATTAATTGTAGCCGCTTCTAACGACAATATGTACAAGCC  
TAATTTGTGTAGCATCTGGCTTACTGAAGCAGACCCCTATCATCTCTCTCGTAAACTGCCGTGAGAGTCCGGTTGGTTGGACGAACTTCTGAGTTTT  
TGGTAACGCGCTCCCGCACCCGGAATGGTCAGCGAACCAATCAGCAGGGT

>c38830\_g1\_i1\_len=286

GCAAAATATTATATTGTTATTACGGTATTTGCTATTATAGGAGGATTTGGTCAAATGTAATTTATATATAATTTTTTTCATAGTATTTTTTATGGAA  
AAAAAGCAGTACAAAATCCATGGAAGCCAATACATTTGGAGTGGACTACTCCTGTAGAGCATATTCATGGGAATTTGGCCGGGTGAAATTCAGAGG  
TACATAGATGGCCATATGATTATAGTAAACCGGGACATGATGAGGATTTTTGTTTTTACAAAACAGTTCCAATGAAAGAGGGGTGAGGAAGAACCTCA

>c9445\_g1\_i1\_len=1618

ACTTCTGGACGGGGATGGAGGGCCGCTACTCCCGCTAGTTGAGTACTAAAGTACGGGGTTTTACTGTTTTCTTCCAGTCGCTTTTTGTTGGTTT  
CATTTGGACTCAGGGGCCATTTCTGGGACACAACAGGCCCGGTTGACGACGAAACTTCTTGGACGGGGATTTGGAGGAGGAGAACAAGAAAGGA  
TGCAGAATGGTTCCTCTATCCGAGATGCCAGTCAAAAACAGCAAAACCTTTGCTCTGCATTTCCAAAAGTTTCGGATCCCTGAAGACGGTCACTGGC  
GCTGGGAAAATCCTTGTCCCACTTGCTAAAGCAGGCACCGGCTCCTACTCCCGCAGCACCCCAATCCATCAGCTTCTTGTATGGATATCCTCTA  
TGGTGTCCGATTCCTTGGCCACCAACCGCTCCTTCTTCTTAAGGACGCTGTTGAAGCTTGGTTTACCCCAAGATTCAACCCGAGAGAGCTC  
GCACAAAAGCCTCCCACTCCGGCAATTTCCGAGCTCGCAGGAAATTCAGCAATTCATAGGATTCCTGGAAGCTCTGCTACGACCCCGGGTTTTG  
CGGGGGTTGCCACCGCTGAGGCAGCGGTGACTTTATCGCTTGGTGCATCACAGAGCGCACGTCAGCCACCGCATCATCGGACGTGGCGAACA  
GAAGAAGCCCTGGCGTGGCATAACCCACCACTTTGGCGAAGAACTGACAGCTAGCGGTTCTTACTTTTCGTCACGTAACGACGAGGTAACCT  
CCGACGGTATATAGTACCTGTGCTCCGAGCCGAGCTAAAAGGCCCATATCACACCCGGAGTGCATCTAAAAGTCAAACGCTCCGAATGAAAG  
AGCCGTCGAGGTAGTAAAGGATTTACTCCAGCCAGATCACAGTATATGGTATTCCTGCAATACCGAAGCTGGAGTCTCTGCTCCCTCGAATTCAA  
CAGCCCATTCAGGGTAAACGTTGACCGTGTGGTACCAGTGAACCTCCGGCTGCCGCTCCGACCCTCCCAACCAACTTCCATGGGTGGAAGGC  
CGACTCCGCGTCCGAGAGGTACCACTTGGTAAGCGTTTTAGTGGGATTTGAGAACCCTTTTGTCTCTATAAAGCCCTCATCTGAACGCTAGGCTTAA  
ACGCAGAAACCCCTCATAAAGTCTCGGGAAGTGTATTTGCACTCCAGTGCATCTGGAGTCCAACCCACAACCAACGACCCATTAAGTGGTGCAC  
ATCCGAAAGCAGGTAACGTTAACCCTAAACCTCAGAGCCGCCATTTGACAGAGCTCTGACTCAGCTTTTGGCTGAGGTTGGCGAAATCGAGC  
GGGCGAGAGGTTGTATAAATGCAACCTCCCGACCTTTGCGGTAGCCTTAAACACAGCCGTAGCTAGCAAGTGCACCTCCCGGCTGACTATGACGG  
GCATCGTAGCAGTGGTTGACGACCACTTGCCTGGCCGCGCTGCCCTAGTGGATTGCACGGCCCTGGCTATGAAAATCTCTCCTGTGCTGCGCCA  
GAGCAGCATTAGTCTTGAACCTGGCGATTGCACCTGTTGACACTTCATCTTGTGTGGCGCTTGATAATCTAACACTTTGTAGAT

>c9477\_g1\_i1\_len=2761

AAATCAAGTGAGAAAGCGTTAAATGTTCTATAAAATTTAAATCTTTTGGCAACTATGATTTACAGACTTCGGGGAATGCATGGGCTGACTTTCAA  
GCTAGCGAGCGGATTTTCCATGAATACTACAGCGTGGTTCCACCGGTGTTGGAGTCTTGTCTGTAATCTGTTTCGTAGAGGAGATCGTAAAACCA  
GTTATTTGCAACGACCGTGGAGGTTTCGGCCAAACCAAAATGACCATAGGAGTGGCTGTAGCCGCTGCGGCGTATAGTGCATTTGGCGATTTGGTAGGAA  
GTTAAAGAGAGCTAAGCCGCCACGTTATGAGAACAAGCCGCTAACTACTTTAAGGAAAGTTTCTACCCTGGTTCGCCCATGATGGATGCTCCAAA  
CATTCACAGGGCAAGTGAATTTGGCGATGATAGGGAAGACAATGTCATTCGGCTTATAGGCAGTGGTATACCGGTTGGTGAAGTATTTGCTCAC  
TCCTACCCACAATCTTATGGACGGTCAGGACATCCATATGATAGGAGGGGCCAAGGATGCGGTTACAGTAAAACCTGGATGAGGACATGTAATAGA  
CATAGCTCCAGATGTTTCGGCAATCAAGTTTACTGAGGCTACTTGGTCCGACTTTGGGCATATCTCGCGCGGTTTTGGGCTGTGCTCAGGGAAGAC  
CACGGCTCAGTGTGTGAGTCTGTGGACATGCGAATGTCAATTTGGAACCTGAAACATGAGGCCGATGGCTGCCTTGGACGCTCTGTTTTATCAGGG  
ATCAACGATCGCTGGTTATAGCGGATCAGCCTATACCCTGGCAATAAGGTGTTGGGCATGCATACGCATGGTAAGGAAGTTGGCGGTGGAGGCTA  
CGAGATCATGATTTGTACATGAAATGAAAGTTAGCCACCCGCCAATGGGATGAGCGTGTGATAATACGATACACAGATGCTCAATATGCGAC  
TATGCACTAGCAGGATGGTGGTGGAGACCTAGGCAAGCTATCGTACGTGAAACAGGTCGCAAAATATCAGCTCGTTAAATACAGATGATTTTCGAG  
AATGAAACAATGCCCGGTGATTACGTTCCGAGGAAGCTGGGCCGATGAGAGTGAAGTATACGACTATGAGCAGCGGTTGGCTAGAGGCGAGTACAG  
AGAAGAATGTGCTCTGCCCTATTACTCCGGAAACGTTCTTCTGTTTTCCGGGGGAAGGCCAGTCTCCAGCTCAGGGGCAGAGTATGGAGAGGTAGC  
ACCGAGGCCCTTCGGGTTTTAGGTTGATCTCGTCCATCCCGGTCAGCAACTCACAAGGGAAGCTTTGTATCACGCCGCTTGAACACGCTCTC  
GAAGAAAGAGTTGGCAGGTTGCCCTGAATTTACAAAGAAGTTGGACCACGGCCATCAACGAGTACAGCCAGCCAGGCAAGGAAAGCGGAGTGG  
AGCTCCTTCTGCATCCAAATTAATGAGGCAGCGGAGCGCAAAACGATCGAGGCCCGAATGAAGCTGAAATAGAGGCGGTCACCACAGTGTATA

GAAGATTTCTATAAAAAGTCCATGTGTAAGCCTGTCAGCTCCCTTTGGAATTTCTCGTCAAAAATTTGGAACAATTGCTAATGACACTGGACAATTTCT  
TCGGCGCCGGGTTACCCCTTATCAACGAGAAGCTCCAACCATAGGTGATTTGGTTAAAGATCGTTGATGGAATGCCCAATATAGTTCAAGTCCAGGCGC  
CTATGGTATGACGTTCAATAGTCAATGCGAGGCCAATACGACATATTTAGGGCTTTTCGTCAAAAGATGAACACAAAAGCGTCAAAAAGGTCAAA  
GCGGGTAAAGTGGAGGTTGATTATAGCATCGTCTTTGCCAGTTCAAATGGTATGGCGAATGCTTTACTTTAGCCAGAACGAGGCTTTAAATGCCAGT  
TCTAGCACAAATCCATCAAAACATGGTTTTGTGTTTTGCTATGGTGGGTGGAGGAGATTCCCTCGCCATGGCTAAAACCTAAAGGAATTACAATCTCG  
CGTGATATCTCTGCTGGGACGTTGAACGCTCCTGGTTGGGTCTTCAAGGTGGTGGGTAGGTTACGGGCCAGATGGTCTGGAGTTGATGATGAATGG  
AGCGGGTGCACAACATGTTGTACACCGATGCCATGAGGATCCCGAATCCTTTTCTCTAATGGATTGATGTTAAACAGTTATTTCCAAGGTTTC  
ATGAAGTCCGGTCTCTTTAATACCATCACAGACAACCTCCATGGCCATGGTGGCGATGCACATTCTAGCTTGTTTAAGATCTAACTCAATTTATGGC  
CAAATTTTCGCCACAGGCGATGACGTCGTGCAGGAAGTTTGTAGTGATGAATATTTGAGCGTCTTGTAGAGTTAGGGTGTGGGTGAAGGAGTTG  
ATCAATCATATAGAGTTTATGGGACTTTCTTTTAGGACAGGAAAGCCAGAGCCCTTTACGTTGGCCAAACATATGGTTAATTTTATGTGTAAGGAG  
GGTCTAGAAAAGGAGGTTTTAGACAGCTACTGTGCAATTAATGCTGAGTCCGATTTTTCGATTTCTGGCACGGGTAGCGAAAAGTTTGGGCATG  
CAATGGCCCTCTCGTCTTATTACCGTTTCTGGATGTGAGTCCCTGGCACAGACGTTGCGGCAGCTAGATTGATGATGATGATCTAGCCCGGAT  
CTCTGGAGGTGAAATAGTTAATATAGGCGTTTCGCGCGCTCTATATTAGGTTGCATCTCCAATTTTGTGGT

>c2174\_g1\_i1\_len=953

TGACACCGCTGTTCAAAATGGTCTCTAGTTATTAATGGTCTGCTTCTGTTCACTGAAGTCGCCATGGATTTTGGAGTTGGGTGCTATTTAGGCGG  
TCCAGGAGCAGGCAAAACCTATGAGATCATAAATCGGTATACCAAAGGTCAGCAGATCACTTCGCCATTGGTTAAGAGTGTGACGATGCAAGGTC  
CGATCTTGTCAAGAAACATGGGTTGCGCCTGCTTGTAGTCCAGAGAGTTGTGAGGACGATCGATTCTGTTGCTGTGATTGCGGGCAGGGGCGTGC  
CTTGCCCTATTGTGTGAGATTTTGGCAGATGAAGTGTATAACGAGACCGTCCGCTCAATTTGCAAGTGTGGGAAATGATGCGTGCAGAAACGCT  
CGTGGCTACGGTACGATCGTCCAGATCCACCTGTAGAACCTCTCGAACCTGCTCGGTTGATCCGGAGTTGGCGCCTGCCATATTTGTGAGGAT  
GTTAAGATCTGGCGTTACGGACCTGAAGTCTTGAATGATTGCGAAACACTATGATTTCAAATTTGCGTCTATGCGACCTCGCGGTTATACTGA  
GTGATCAATCTGGGAGAAGCTCAATGATTACAAACCGATGTGTGACGATTAATGTTATCGGGGCGTATCAGGCACACAAGTCCCTGGCCAA  
GAAACGTTATCTTGGGAAAGGTCAGGTCACACCATTATGAGTCAAGGAAAGACTGTCGAGGAGGTGATGCTGACCGAAGCTAGAGTTCAAG  
GAAAAGAACTCTTACAATTTGTATCAGGATCCGGCGTACATCAACGTGGCGCTGTGCGGTGTGCGAAGCGCCTTGTGCTGAGTGTGACGGG  
GGCCACGCTTCTTGGCGAGTGGTTCAACTATTCTGTTGACCCCTCGCGCGTTCGCCCTTGTGCGGATGTTGCTAGTGCAGGAACCTCCG

>c11895\_g1\_i1\_len=515

GGCGGACCCCTTTCGAGTGGGAGCCCGTGCATTAACAGGTAGAGCAGCAATTTGCTTACGACGTAGTGCCTCACGTTGGGACGGAAAGAGCGCACGCC  
CCTTGAGCTTAGCAATCTCGTTTTTAATAAAAATATCTGGTGAAGCTGTTGGGTACATATTCAGCTATTACCCTCTTAACCAACTCAGGGAACCTCGG  
CGAACTCAAGGTTAGCGGCTTTGTTACAGGCGGACCCGCGCAGTACGTATGTCGCCATGGTTCGAGGTCATCCGCAAGCTCAGCGACCTGTATCT  
CACGCTCCCGACCGCTGTAGGTACACATCTGCCTTTGGCCACCTGTACCGGACCCCTGGGCGGACCCACTTCTTCTGTAAATCGAGGAAGGTGT  
CGAAGTCCCTCTGTTATAGCACTTGGCCGATCTATAGCTGCACCCCGCTGTTGATCGCTGTAAATAAGAGTTGGCGCACTTCTTCGCAAAACACCA  
TCTCGAAACGACCTGCCGAGGCTGTTCCATCGGCG

>c17275\_g1\_i1\_len=561

CGCCTACCACCGCCCGGAAAGACGTAATGAACGACCACCCATATGGGCTGCAGCGCGCAATTCACCGTGGGCTTATGCTGGACTACGATAAC  
TTCAATGAGAAGCATGAGTTTGCAGACATGCAGATGATCATCAACGAGCTCAAGGATTTGTACCGTGTGGCGGGGTGATGAACAGCGATTTGTCT  
GCAATGATCGACTGGTTCGTCGAAGCGTACGATCGCACTGCTCTGGAGTACGAGGACAGCTCTTCTGTTCTCGGACATGGCATGTTATCTGGCCAG  
CGCCCAACATCGGCTATCAATAACATCATCAACGCGCTAATAAACGTTGTGATCAGGCGCCAGGTAGCTGAGCTGACAGCCCTATCAGTCAATGACC  
AACCACGCTGGGTGATGACGTAGCGCGGAAACCACTGACTTGTACGAGGCGGCACTTATTGTGGCCGTCGGGCAAAATGCGCTTCGCT  
TTTAGCACCAACAAGCACTAGTTAGCTCGGGTTTTATGAGTTCTTCCGCTCATGACGAGCGTACGCGTGTGTACGGG

>c18610\_g1\_i1\_len=1073

GGCTTCTTCTTTTTGACAGCACAGTATAAGTGTATACCTACTTGTCTCAACACGCAACGCTTGTCTCCGCCGCTCCGCGTTAAGTTATCGTAGCTAGCA  
GACGACATTTACGAAACTTCAACATGGCTCAAGCAGCATTTCAAAGCCAACTCAGCATCCATGCTGGGCTCGGACTCCCCGACGACTTTAAGCGC  
AATGGACCGCTTCCGGACCGCTATTCGCGCTTTGGCCGACGAAGCGGGGAACGTCGCCGCTCAGCGGCCGTA AAAACACAGCCAAACAGGGCTA  
CCGTTGGACAGTCTCGGGCTCCGTCAGGCGGTTGCACTGAAGGAGATGGCCGGCGGTGAGTGTACTCGACTTTCTAATGTTGGGTGACAGT  
GATTTGATGATGAGTGAATGAACGTTAGCGGATGAAGCGGACGAGATCACTCCATGCTACGCTGCGGATGAGGCGGCTAGAGCGGCTAGGCTCCGCTCA  
TCGACCATAGAGACAGGGCTCGCTACCCACGCTTTGTATCTCATCGTACGATGACGGGTGAGTACACCATGAAACGGGACTTCTACGCGGCT  
AGTTCTGCAAGCGCAGCCGCGGACGGCCTGGCGTCTCACGCGGCTCAGGCAACAACTCGCCCGTCACTTTGGGCGTTAGCAGAGAGATGGTGCAC  
CAAGAGAAGTCCGGTATGGAGGGGAGATGGAGTCCGTTTCTACGATGTTGGCTAGTGCATTTAGCGTCTGGCACAGAAAGGCGTAACTGTT  
CGCGTAGACAGGCCATCCCTAAGGGGTAGCTTAGCCGCTTTGGAGTGGCTGCGGAGGCGATCAAGCGCGTGTGCTGTCTGGGCTGCGAGTCAAC  
GCTCGTGGTTTACGCGCTCAAGCGCTCGGCTGCTAGTGGTGGTTGTGGTAACTGAAACGGCCTTAAACGGGCTGCACCAGAGAGCGGACCGCTAC  
CGTTTCCGCTCCACACCCCTCACTCTATATGGCACTACGGACACCAAGCGTGTGAGCAACGTTGAACTGCGCGACCCCTACAAGACCGGTGCCGCATA  
GTGGCACTTGCAGCGC

>c54876\_g1\_i1\_len=513

CGGGGAGTTCTTCTCATACCAAGACCTCGCAGATAAAGTTTACACCACGCTGCAGGGAGTTGGGGTACTTCCGTTACGACCAACGGTCTTATGGAGC  
GTGGCGTCAACTGGCTGCCGCTAGCAGCAAGCGTGAAGAGTTGAACTTCGCGTATGACGTGTGTCGCGATCGGTCGTACGTTCCCTTGGGTGCGCGC  
TGTGGCTTCGAGAGTGAATGAACGTTACATGGGTGCTGCATGCCGAGGAGGCGGCTGCTGCAATAGCTACGCCATGTGGGCACGCATTTATCTCT  
CGCTGTGAGCAGCATCGCTGCCTGAATGCCCGCTCGGCGACAGGAGCGCAGCTGGAGCGACCAAGTTTCCATACGGACCCGGCAACTCGAGGTT  
TGCCTTGGTACGAATGCGGATGGTTACGTTGACGGCGATAGGTCACCCGACCAATATTTGTGGTTCCGCCAGCTGCTGAACCGTAAGGACGCATC  
TTACGAGCGGGCGGCTGCACTGCTATGATGGG

>c10259\_g1\_i1\_len=1503

CATCTAATACGTCAGCTTCCGGGTCACAAACCACTTCTTGTGACCTGCTAGCCTCGGTGTCTGGTGCAGCGCTCGAGCCTTAGTGGCTGGCCT  
CGGTTCTGGCAACGCCACTCCAATGGCCGCCCGATTGTGCACGACTACCGGTTTGGCATGCGATGCGCCGGAACCCACAGATAAGCTCTTGTCT  
CCGTCCGCGGTGTATGCACCGCCACAGGCTGTAGTCACTAAAATTTGTAGCCCGCCGCGCAGCTGGTCCGCTGTA AAAATTTGTTGCTCTAGC  
TTTACACCGCGCTCTCTGCCAAAGCTATGCTTTCCGGGCTAAGGGCTGATTTTATCGCGCTAGTGTGTTGTTCCAGTTCTAAAATTTACGCCAGCC  
TGGGACTTTAGGGACGCGAGCCAGTGCATAAGCGCCGAGAGCAGCCGCTCCCACTGGTGGGACTACATTTGTAATGCTGCTCCTCTAGCTCGCGG  
ATGATGTCGCTCCTCCGACCGGCGACCACTAACACTGGCCCTTCAACACCGCCGCTGAGGCGTTTGTGCTCCAGCCCTCGGACCCCGGCG  
ATGATCCGACCCGCGGTTAGGGCGGTTCTCCATAAGTTTCTGACAGGGCACCCCTGCTAGCTTAGGCTCCGATCTTCCCTGGTCAAGCTCTCCGAC  
AGGTAATGTGGCCTAACAGCCGCGGAGTCTAGCGTCTTACCCTCAGCCTGTGGGGCCCACTCCACTGCTGTGCTGTTCAACTGGACACTCAGC  
CCGTGCCGACGCCAGCAAGTGAAGTGCACACTACCACCACTAATTTGACCACTGGTTGCTAAAATGAGTACCGCAGTTCGCGGCTCAGC  
CGGGCCACCTGTGACCAACAGGATCCTCACTGCCCCCTCAAGAAAGGACTGGACAGCAGAAAGGTTGGTACGTCAGCAGCCCGCTGTTTTGCA  
ACAGCCGGATCGTGGTGGATGTGAGCGAGGTAAGGAACTGCAATCGTTTTGTTGCTTCTGTCAGCGCTTGCACCGCAACAGGACCCCGC  
TAAGCCAGGCTGTGCACTATGCTGGTTCTGACCACAGTATCGGTGTTTCAACAAAATCTTCTGCTATCTATGAGCGTACTCATGTGCGG

AAGAACTCCCCGTGCTGCCGCCGACCTCGCGGAGGAGGGTGCCTGATTTGGAAGGAGCATCTGTCTGCCGCGTCGACATCGGTTGCGTGCATG  
GAAGACATGGATGCTCGCAGCATGTGTCCACCCACTTGTGCCACGCTCCTACCCATGAACAGCGACAGGGATAAGAGGCGAGCATCGCCAAAGTCT  
GAGTTGCTGCTGAGGGGCCCGCCCTGCAACCCAAAGAGACACCCACAGCGTCACTATGGAGGTCAGGTTCCGGCACAAGCCAGGGTCAACCCGCGCCCA  
GCATCTGTGACACCAAACATGAGCAGTGCAGTCTTCAGCGCGTTCCGCGACTGCGATTGTGAG

>c18623\_g1\_i1\_len=378

GTGTGGCGTACGGACCACCTTTTCGCATGCACCTAATAGCTGGCATCCGGCTGCCATTAGGATACCCGTTGGTCTGCGCGTAGGAGTCAGCATGATCG  
CTCATGCCCTGGCCGACCATTGGAGTTGGCCATGTCTACCCCGCCGTCGAATAACTGCGTACAGCCCGCCAAATCGGGCACCTGTTGAACATTGCCAAC  
AAGTACCCATAGTTCTTATAAGCGTCGACGCAAGCGGCGTAGCCTGACTGGACATCGTAGCTGAACGGGCTAAACCACTCCATGCCACCCCGCCCA  
GTAAACAAGAGGGAAGTTATAGACGCCATCAGCGGCCGACGCGCTTCAGGGTCCGTGAGCCTCTCAATGTACTGTTCAACGACAAGTGAG

>c18803\_g1\_i1\_len=293

TAACCCGTGGGCATGCACCACCGGCTGCAAGGACCCAGGCGGGTGGTGCCTGCAACTATGTGGTCTTTTATTATGAAACGGGCCAATCCAGACAT  
CCAGTAGTCAAGCGCAAGTTCTGACGGGTACTCCGTGAAGCCGTATCCCGTTCGGGCGACAGGTCTACCCACTCGGATTCACTCAAATACTCCAA  
CCAAGCTGGCCAGTGGTGGGCCCGTACTCCAGGATCAGCTTGACCTCCTTCCCATCTCCAGCCACTGCCCTTGAGTTGCAAGGTGTTGCTGCCGTG  
GCTCG

>c28520\_g1\_i1\_len=232

TGTAGGACATGAGTGTCCCCCAATTGCCGCTTATATGCCAGCCCGAGGATTGCCGAGCTGTGAACTACTGTGGGATATCATCGATCACCACGT  
GAGCAACGTCCTGATCCGGCAGCAACACGTAGGTACAGGCGTCCAGCCGTGGCTGCCCGTGGGCTTATGGCATGGTCCCCCAGATGT  
GGGCGCTAGAGCAGCCTGTATGAGTACCGCGCGGCTTG

>c31892\_g1\_i1\_len=286

GGACCCCTCGGCTCACATACCTCTACGTACACACCACACCTCTGCTGACTATCGTGCCTTCTGACCATGGGCGTACGCGGTGTCAGCATTACTC  
TGGAGCGATCGACAGCGCTTATTCGGCGTGCCTGTCTGAGGAGGAGGCTAGGGCTGAAGACCAGCTGGTGTGTTGTGCGTGTGGGCGGTGACGCGCC  
CTCACCCCGCTCCCGGGGGCTGACTCCTACACGCGCGTCTCGGGAACCCGGGTGCATGCCTCGCGTACTACTTCGCTTATGCTCAATCCATG

>c35229\_g1\_i1\_len=493

GTTGACGCGCGCAGCACCTCCTCGTCACTGGGAGTGGACGCGGTGCAACGCTGTCTACGTGCCAACGGCACCTAACGTAAGCATTATGCGTACC  
GCCAGGGAGTGGCCAGAGATCGCATGCCACGCTAACGTATCTCCAGCCACTCGGTGCGCCACCGGTAGAACAGTACGCGCCAAAGACCATGGT  
ATCCAATACGATGTACGTTCCAGGAGTCTCGCACGGAATCATTGCCGCGTGTGACGCTCTCGCTAGTCTGCTAGTGTAGGTTGGGTCGCCCAACGGT  
AAGGAGTCCATTACTCGATCTGCGGAGTACTGGTGGACGATACCGCGGACATTCGCGTACTGTAGCCACTCAACAACCCAGAACAGCCCTCCTG  
TACTATTACGAGTGGCGGCAACCGTGCAGGACGGGTTACTGTCTCCTGCTCTAGTGACCTCATGACCGGGTACGAAGACGGCAGGGT  
GGGATTGACTTTG

>c45206\_g1\_i1\_len=581

CAATAACTGAGGAAGTCGCTCGCAACGGTATGATGACTGGCGCTGTTAACGCTGACTTAGAATTCATCAGCGACCGGGGCTCTGCGGACGATG  
CGACGTGCCGCTTAGCCACGCTACCTTACATGTACACTGGGGCCAAATAGTACGCGAGTAGAATACAGCTTTGCTGGTAAATGTTTTGTGTGCGAC  
CAGCCGTTAATGAAACAGTTGTGAATGCCATGTACTCGGCGCCACCGCGGATAAGTGGGCACAAGCAACAGGCATCAAATGCCGCGAGTACCCG  
CCCAGTCTCAATCGCCTGGCGCCGTTCCAGGGATGCCACGCTTGGCCTGGCCAAACCCGATGCCCCAACAGGGGTTTCGACAGCTTGGCGAAACAG  
TTGTAAGTTGCGCACGCGGGGATGACTACGGAGATCGTTTTGTTCCAGATGGCGCGGGTAGTCTCCACGCAACAAGTGTGCATACTCTTCGGCACA  
AGCCAGTTGTCACGCCAGCTATGCAGTCTACCAACGCCGATTTTTCTATAGCAGCGCGGACACGCCCAACCTACTACCCTCGCAGCTGATGGACC  
CTCGG

>c55497\_g1\_i1\_len=239

ACCGGACAACGTTGGCAAAGGAAGTTGAAAACACTGTCGTCGAAGTTCCAGAGATACTCGACAAGGAAACAGGAAGACAGAACAGATACTTCGACG  
ATATCAGACAGCGGCTGTCTAGCCAAAGCATACAGCCAGATGTGGGCTTTGTACTTCTTCCACAGAAGAGACTTGAGGTTAGGATTTCGCGCCATC  
GTTCTAGTGTCTGTGGAATGGTTCCCTGAAGGGCGAACGTCGTG

>c40408\_g1\_i1\_len=317

ATTAATAACTTTAATTTTTATATGAGACACAGCACTGATATGTTGAAAGATTATATAATCATTATGTTATTCAGAAAAATCATCAAAATGGGT  
CATAAAGAATAAGCCTATTTATTAATAATTAAGAACTCTAAAAAAGAAGATGAAAAGTATAAACTCTTGAATTTGAAAAAGTT  
TGGATGGAAGAATGTAGAGGATATGCAATGTTCAAAATAAAATTAAGAAAGAACATTACCTCTCAATATTTTAAATATGATCGTGCAGATTT  
AGAATATATGAATTTCAATGAAATTAGAG

>c9510\_g1\_i1\_len=536

GCCCGTCCCTTACCGTACTCCATTTTGCCGCGCATTAACAATATCGGCACATCCTATCCCCCGTCTGCGGAGATAGGTGCGTGTAGCCTTCCAAGT  
CTTTGCACAGCCTGTGTTCAAGTGGCCCAAGCAAGCTTTGCAAAAACCTCCCCAGTACGGCCTGTAGGCTCTGGACATCGACACCTTTAGTCT  
CCCTCTTTAACACCCAATTAGACAGTAGGGCTATCTGTTGCTTCCGGTTTCAATTTCCAGGACCGTGCCTGAGTTGACAAATTTCTAGCACCAAGC  
CGACCCCTGACCTGCTCAATCAACAAGCTCGGCAATCGTCGAGAGCACCAGTCTCACACCCAGAGGAATTAATGTATTTCCGAGCTCCTAACT  
TCATGATCTCGCGTACGTACTCTGACTCTGTGTTCCCCAGCACCACTGGTGACACTCCCTCTGGCAGCCGCTGCAATGCCACCTTTTGCCCTAACT  
GTGCACCGCACCACCCACGACTATCAGGCGCTGTAACAGTGCAGCAACTTTGTTG

>c16117\_g1\_i1\_len=424

GTGTGACACAGTTACCTCAGTCGGGCATATGGTGTATCCATGGTTTCGTGCTGCCAGGCAGAATGGTCTAACAAAGATGAAGACGCTCCATTAC  
TGATACGTTGCAGCCGATATTTTATGAATACAAAGATCAGCGAGCGCGACCGGCAGGCACTAATGTACATGGACCTGTTGGTTGGGCGAGGTGAAT  
ACACCATTGACGAAATGGCTGAAGTGAATGCGTACCGATGACACCTACGACACGAGACACCTGTCGTATGACCCGCATAGGCAGGTGTTTACAA  
ATCAACAATACAAGAAGGATTTTATCACATCGGTAGAGGAGGCGTATATTCGACTTAAGATTGAGCCTAAACCAGTCAATGTTGACAGTTTCAAGG  
ACTTTTACACGCGGAGGGCATCCTGGCTAACCAAGGGGGG

>c16636\_g1\_i1\_len=213

CACAGAAGGAACAGCAGCGCCATACCTCTACACCAAGTGTTCAGGTCGCCACCGAGAGGTAGTGAACGCACCTCGTCTGAGTCGACCAGGTGGAGC  
CATCACGAGGGGTGCAGTCAACCAACGCGAGGAGCCACCGGCATACGAGTCCGGAAGGAGCTCGTACCAGTACTTCCAGCATCGAGGACTCA  
GTGAGCCAGCATGAAGGAGAG

>c18833\_g1\_i1\_len=466

GTTGCGCGAAACGTGACGAAGGCCATAAGGCTTAAGCGGCTGGCTAGGACGAAGCACCGCGTGGAGATGGTGAAGAGTGTGGGTACAGCCCCGAC  
CTGAACCTCAAGGGACATGGGCAAAAAGAAAGAAATAACTAGCCGTAGCTCATACAGGAGGAACAGTAGTGCATACCACTCCACCAGGTCTCCGA



>c37624\_g1\_i1\_len=614

CAATATTATTGACTGTTCCATCGCTCACTGCTGTTAACACAGCATTGGCCTAACCCGTGGTTGGTACGGTGACGGCGACACGCTCAAGATGTCGA  
AGAAAGAACGGCGGGACATGACAGACGCCCTATGCGCTGTCGGGTGGATGTGTGGGCTGAGGAAATGTAGGCCGACAGTATTTCCGAAATAGGGCAG  
GTAAGAAGCAGGTGATGGTGAAGCGTAGTGAACGGAACTGCGAGCAGAAGCGGGGGAGGACTGCCGAGTACGAGATGTAGAGTTCGCTGGAGG  
ACACCCAGGTGGCAGAGTAGATGAAATGAAGAGGCCGGCAACAATTTGTACAGGACAGAGTTCAGTGGGACAAAGTGGCCATGGTGTCAATT  
ATGAGATGGGGATGTGGATTGAGGCTAGGCAGACAGACTATGATCGAATGAAGCGAGAGACTATGAGTGGGACCTGACTAAAAGGAACGGGCCA  
CCATGAGCAAGGTGAGCGCAATGCCTGTTAACTGGGGCCCGCCACCAAAACCACAAGCATAAGCTGGAGGCTAGTTTAGAACATATGAAGAGTGTGA  
GCCGGGGGAAATGCAATAGTGCCAACACGGGAGCCCAAG

>c39328\_g1\_i1\_len=266

CGAAGCGTTCACCTAGGACTGCTACTACATTGGAAATTTGTACGGCCTCAGGAATGACACTACCGGTAGGCTGCGCCTACTATACCATGTTAGGGC  
GGCAAAATGGGATACAGTATGCGGAAGGTGAGGCAAGGAGTGTAGCTAGTAACACCTTCATGGGCGAACCATTTGACATTACTGGAGCGGGACAT  
ATTTATTGTCGTTGCACATGCTTTCGAGCACAACATCAGCATCACTCATTAGCAAAATGGCGGGAGGAGAAGATGG

>c43319\_g1\_i1\_len=505

GTTTGATTTTCGGCTCACGATGTTTCGAGTGGTCCCAGGCATTGGGTFCAGCTGCCCGCTGTATAACGAGCCGCGCAATTTTCGACACTTGTCTGA  
CTTGATGCAAGTTCCTCCACACAGTCCGCTAAGGAGCTAACAGGGCAACCTGACACTGCGGCAGCTCTGCCACACATTTGACATATTTATCCAT  
GCCTGATGCACGAGATAGCTGAGTACCATGTTGGGGAGAGTCAGACTTTCGTAACGTGTTGCTGGCCGAATGGAAGGGTGTACCCAGTTCCAC  
CTCAGTGGGGCACATGGTATACCCGTGGTTCGCGTGTGCCAGGACAGTGGTCAAACAAAATGAAAACACTACATTCGCTAATACGCTGCAGTCCG  
GTACTTCATGAACAAAAGATTACGGAACGAGACCGTCAAGCATTATGTACATGGACCTGTTGGTAGGCCGTGGCAGTACACTATCGACGAGAT  
GGTGAAGTCGAGCTTCGAACTGAC

>c45192\_g1\_i1\_len=938

ATGTTATTTTCAGCATCAACCCACAACACTGCCACAACCTTGATTACATAGTACTCTTCTTCCCGTCAAACAGTCCGTACTTTTCCCTGAGACTGTCTC  
TTAACTCCTTCGGTACGTTAAATTCCTTACACAACCTTCTCAATTCCTCACATTTAAATGATTCCCTTCAGCGTTGGCTGCTGCAACCAGCCAGC  
GACCATCCTCCTGACTGAAAGGCCCTCCTCCAGACTGGATGGCGCTGATCGCCACTCCAGATCATGTGTGGGTAGTCTCTCCAGGTCATCTGCCT  
GGAAATTCGCCCGGATAGGTTTCAATAGTCAATCCATCTACCATACTGCTAGCTTACGTTATGTTTCAGTGAACAGTTTCCCTTAGATGCCGCTT  
CAGCAAAAACCTACCTAGCTCCTCGCCGCCGAACACTTCACTCTCGGGTCCAACCCAGATCGGTAAGCCACAGTCTCCACACCTCACTACCTT  
GGACAACTTCAGGCTTCGGCAGGAGCCTCTTCTATACTCCCTTCCAGTTGCTGCGTTCGCGCATCATAGACCCTAATAGACTCTCGAACTTGC  
CCGGTTCGCATGCTTAATTCATTACTGTAGTTGATACCTGGAGTTACCATTAGTTGAGTTGACTCCATTTAGCCTGCCGCTCCTCAC  
CAGCTGTTACAAGCCTATGGACTAACGATGGCATATCACTCGAATCCTTAGCCGGACAGCACCCTATCGCTTGTGTTAGTTAAGTCCAGCCACTCTT  
TTCGCTCACGCCACCAGCCCGCCGCCCTTAAGCAGCCTATCTACCTGCTCCTTGCAGTGAATTGGCTGTCCTTAGGGCTTAACATCCGCTCTA  
TCTGCTTATCTTCTCGGCTGTGGCAATGCCTTTGGCCTCTGAGCTTCAGAATGTGCCTCCATTATCTTATCA

>c45358\_g1\_i1\_len=208

CACGGGAGCCCAAGCATGTGCGGGTGAACCTACAAAGTATTGCTACAGTACCTCGGTATGTGCGGGATAATGAGGAGAGAGAAGTGTACCTGCCT  
ACACTAAGCCCGAGATAGCAGAAGGTGATGAAATACAGTACAGTGAATGATGTCCCTGGTGACGGGTTGTGCGGAATACATGCAATGGTAAAGG  
ATCTAACGGTGCACGG

>c45834\_g1\_i1\_len=494

GTAGCCCCGGGTATTACAGTGACAACATTTATATTAACACACAACAACAACAACAACAACAACAACAACAACAACAACAACAACAACAACAAGCTA  
CAAGAGCAATCATGGCTGCGGTATACTATGGCGGAAGCGCGGTAGTAGTATGGGAATACAGACATGCGCCGCGCGCAGATGAACGAAAAGAAGA  
CTGCTTTGCCAGTTAAGGAAGGAGGCTCAGGCGTTAGCGGTGGCAAAAACAAGCCAGGTTCAAGCTTACTACTTGAACCCGGGAACCCGTGAGG  
GGCGAAGGGTTACAGGGAGAAGGTGGTGAATTTGGCCGTGAGTTCGGGGTCTGCTAGATTATTTTGATAACATGCACTCACCTGCTCTTGATA  
TAATAGCCGGAGACAGGTTCTGCTGAAGTACCAAACTATAGGTGACATTGATCGGGAGCCAGCATTTCGGCCAGAATACTATGACGGCTGAGGTGC  
CGGTCAACTGGGAT

>c48065\_g1\_i1\_len=289

GTGACTCAAATGGCAAGTAAAGCTGACACATATCGGATGTTTCGACGCTACACCGTTCGATGCGGATTATTTCTGAAATGGACGACCCGACTATGCT  
GATATGCTGAATTTGCTCATATTCGAAGGGCTCTGGCTGGTTCGGATGCTAGCGCATCAGTAGACAATGGTCCCTATAGTTTCTTGTCAATGGG  
GACAAGCTGATGCTGGTGATAAGGCAGGCTACGATGTGCTGTTGGAAGAATTAACGTTAGCAAAATATCAAAATCGAGCACCATAAAAATGCCTACG  
G

>c48709\_g1\_i1\_len=393

GTCCAAGGACAGCAGTATGTACAAAGCCGAGGCAATGAGCTTTGATCTACGTGCTAACCTGCCAGTGTATGCCGACTAGCTACAGTTATCAACCA  
TGATATAGTTATAGATGCAGACCTGTTTACACCAGAACAGATATCACTGCTATGCTTTCGCGGGCAGCAGTATCCAGTGTATGGTACGGTGGGGA  
CAACAACATATACAACAGTGTGAACATGATGGCGGATGATTTGGTAGTAGTCAAGTACGCTGATCCACACAGATACTTCCCTCACTGGGGCTC  
CCCCGATCGACTATACCACATGATTTGACTACCGCCCAACGGCTTAATGCCGTAAGTTGCCCTAATGTACGCATTGGAGACTATGCGCGGTAAGTG  
CAAGATGAT

>c49342\_g1\_i1\_len=1296

ATTCCTTTGGGCCGTGAGGAGCGTGCGAACGGCTGGTCCGTAGCCATAGGGTATTATTGACAACGATAACATATTACAACAACAACGATTCAAAA  
CACACAACAACAATAACAACAGCAACTGTAGTTGACAATGACTATCACAGGTCGGAACAGCTGGCAGTCCGGAAAAGTTACAAATGCAGAACGG  
GCCAGCCGGATGGCCACTGAGCGGGACAAGGCATCAGCTAATTACGGTTCGAAAGTGGTTGAGAAGGCTAGGTACCAGAAGTCCGCTCGGTAACCTG  
AACCGCGCGGATATCTTGGGATGAACAAGTGGACAGCTGAGCAGTTGAACATTTCTATGGCCAGTACGAGGACCTAGCTGATCGGAGACACAAT  
CTATTCGCCGTGATCATGCCTGCTGGTTGCGGGAAGACAGCCTGGCTGAAAGGTACGGACTGGTTGACGTTGACGAGCTGGTCTCACGTGCTGAG  
CATGATGATATGTTGGAATGAGGAATGAAATAGTCTCAGGCCGCGCGAATTGGCATGACCACAATACTCTTGGTTTAGGAGATTGAACATGACA  
TTGGATCTTCTCGACTATAGCATGCCGTTGATAATTTTTGTGCATACTGAGGAGACTGCACTTGAATAGGTGCAAGCCAATGGCATGCTTGAAA  
CTCAGAGCATGACACGAGATGAATATCAAGAACAGGGAAGCGGATTCAGGCAGTTTTTCGCGTGGAGGGCTGGAATCATGACGCCGTCAGAT  
AGGGTGCCCAACCAGCAGACCTTCAGTAGCAACAGAGATCTGGAAGCTTTTTTCTTGAAGTTATGAATGCTCAGGCTGGCCGTTGGGGCGCCG  
TTCAGTACAGCAGCTCAGTGTGGAAACAATTCATACGCTAGAGATACACCAGGTTGGTGTGCGGGTGGAGCGGGTGGTGTATGCGGGTGGTGTGAT  
GTTAATGAGTTGAGGCTGCTGTTTCGAGAATGGTAAGGTGCCTAAGGAATGTGTCGATTACTATGTGACAGCGAGCTATGTTCTACACAGTTTGAC  
TTCGGTGTACCATGTTTGGAGTGTCTCAAGCATTGGGCCAGCTGCTGCATGCTACAACGAACCAGTCAATTTTCTACACTAGCTGACCTGATG  
CAAGTGTTCGCCACAGTCTGCTAAAGAGCTAACTCGGGCAAAATGTCACACTGAGGCAACTGTGCCATACATTTGACATCCTATCGATGCCGGAC  
GCTAAGGAGATAGCCGAATATCACGTGGCGGAGGCCAAACGTTTTGTG

>c51680\_g1\_i1\_len=860

CTGGGATAAAATGCGAAGTGGACGTACGACTGTATGCAGGCACCCTGGATAAGTTGATGTCGCGAGCAAAAATTGACTGGTAGTGCACGCGAAGGTAT  
ACCTAACCAGCAACGTAGCCCAAGAGTACTGGGTGGAGTGCAGGACGCTGTGCGTGCCTCCAGACAAACCGGATGGAGTGCCTGGTTTCGCTGCT  
AGAGCAGATGCAGACAGGGCAGTCCAAACTGACGCGCTTGGTCAAGGGCTTCTGCTTTTGGCTTGAATAATCAGAAAAGGAGGGAGTTGACTTCCA  
CATTGGTGACCACATCCAGTGCCTACGGTATACAGGAAGTCTGTAACAGCTACGATTTAGGGGAGAGATGCTATGTCTTACATCCAAACCAAC  
ATCCGCTGCGCACAGTGCAGTGTACTAGCGATGTGTCGTAATCCACCACCAGTGGATTGATTACACGCTGCATGTTCCCGCAGATGCTAGAGA  
TATATGCCCTGGTCTCCCAAGGCCGCGAGTTGCAGCTGGGACAGCTGTGACACTCAACCCCGGGTTGGTTTATTCAGCATACTAACCTATGCCAT  
GGACACCAGTTGCACGGGGCTACTACAGGAAGCAGAGATAATAGCCTGCTCATTGCAGGAGAATAGATACTTCAGCCGGGTGGCCCTGCCAATGT  
GGTGCACCTTACGACCTGATGGTACCAGCCTTTATTGCTCAGAGCAGTCCACTAGAGACGGCAGGTTGTGAGGGGACCTGTCTAAGGCTTTGG  
CCGGTTCCACAGATGCTAGGCCCTGGTAGCTGCTAAGGACATAGTTTCGGCAACGTATATGCAGAGTTCGCGGGGGTTCGACCCAAGTGGG

>c53047\_g1\_i1\_len=243

CCGAAAACGTAATGCTGGGTACGACATAGAGTTGCCAGCAATCCTGCTGACGGTCCCCTGCTGACAGCTGTCAACACTGCATTCGGTTTACCC  
GCGCTGGTATGGTGACGGGGACACACTCAAGATGTCCAAGAAAAGAGCGCGGGATATGACTGATGCTTTGTGCGCGTGGATGGATGTGCGGG  
TTAGGAAGTGTAGACCCAGGTGTTCCGGAATAGGGCGGGGAAGAAGCAGG

>c53928\_g1\_i1\_len=458

GTCGGCTTCTTTGGAACATCTCAAAGTTACGCAGCATGAAGTTATCACTGGCATCTGTATGCTGCAGCCCGTAGTCTCGCATCAACCCGTTGATT  
GTAGATTCGTCTTGGGTGGGATGATGATACGACAGTACCCTAGCCACCAAGTGCCCTCAGAGACACAAGAGGCAACACCTTAAAGACCATCCCG  
TACATCAGGTACAGACACCAGCCAGGCTAGTTGAAAAGAAACCCGGCATCCTGGTTATAACCTGCGCTCTTAACTGCCCCAAAGCCGCTGTTT  
ATAGAGTAGCTAAGAGGTATCATAGCATTAACTTCCCGCAATCAGTCTTAGATACTATATCGCTCATCATCTTGCATTTTCCGCGCATCGTCTCC  
AGTGCATACATGAGGCAACTGACAGCATTCAACCTCTGAGCAGTCTCCAGATCATGTGGTATAGCCGGTCTGG

>c9421\_g1\_i1\_len=1339

ACACAAAGACCAGCCCAAATTTGAAAAATAAAAACAATAAAGCAATACTAATTTTCAACCTTTTACAATTTCTTATAATTTTGCAACCTGATC  
ACTTGTCAATTTCAAATTTCTACTFAATTTCAAAGGGCTGGTCTTCTGATTGATGATGAGGTGCCAATTTCAAAGCTGTAGATAAATTTAAGCCATAAA  
TGACAAATCAGCAGCAGGAAATCGTGTGCCAAATATGTTAGATGGCAAACTATCTCTGTAGCCAACTGATTTCTGATCATTTAACATTTCTCAAAGC  
TTGACAGGCTTGGAACTTATGCTCTGAGGACTATGCTGAAACGCTGATGACACTCAACCCCGGCTTGCAAAAGGGTATTACTTTGGCTAGAATGTGACGATCCAT  
TGAGCCAGATGTTGTGCTCAGGAGCTTATCTCTCAATTAATAATAGAAGTAGAGCTTTCATTAGTTGTGTCTCTTGGGTGCCTCTTGGGAAAC  
TGCCGCTGCAATCAGATTTGCATCTGACGTGGGAAAGATTGTCCAAAATCATTACATTAAGTGTACAGCCCTTGGTACTGCTACAGTTTCTGTT  
GGCAAGGATAGTTAAGGTGCCAACAGGAAACACTGCAGCAACTCTTGACAGTGTAACTACAGTGTTCCTCCTCGTCCCACACTATTCGCAAGATT  
ATAGATGGTCTGAGCGCAGTAATTTCTGGTCTTCCCTGTTTCATTAGTTTCGAGTTAGCATTTCCTCCACATATTGGCTCTGCTTAAAGAAGAAAT  
GATCATAGTGTCTCAGTCACTCTGAATGTGAGTCTTGATCGGCCAGTGCCTTCCCTTCGGAAAATTTCCCTAACAAATACCGAGAACATCAAG  
TCCTTGGTATTTCAAACCTAGCCAAAGTACTACGTAGAACGGTTAAGAAGGAGTCTTCGGAGACCCGTGCCACTAATGCGTTTCATCTCCATACGCAC  
ATCATTAGATCCTTTGATTTCTGCCATTTTGAATTCAGTGCAGTCTGATCTATTGCTCTGTAAATTTGGTCTCTGAATTTTGGTGGAGTCAATCTT  
GTCAATTTATCAGTCTCTTAACTTAACTTAGTCTTAACTTAGTCTTAACTTAGTCTTAACTTAGTCTTAACTTAGTCTTAACTTAGTCTTAACTTAGT  
ACTATAAATAGGAAATTAATTAATAAAGTCAACTTATTAATTTGGTGGTAAATGGAGCCTCTATCTTAGCAACTAAAGCTTATCATACGATTA  
AATGCTTTAACTGAAATTCAGTTATAAATAACAATGCAACTAAATCTTACACAACCAATGAAGGTTAAAATTTGAAATTTGCTATTTAAAGG

>c9498\_g1\_i1\_len=3842

CACAAAGACCAGCCCAACATTTGAAAACAAAGAAAACCTAACACACATTTAGTCTCACTTGTTCCTCAATTTGTTTTGAGTCTTTGTGTTTAAACAA  
ATTTAGTATTTTTTACCCCTTCTCTGTCCACTGAACCTTCTACTACATAACAACCTTGGCTACACACTTAATTAATCCTATGTATAAATGTAGATC  
ACTGGTATAAACCAGCAGAACCAATAACCAAGTAAAAATACCTTACGAAGCCAAAGTTTCCCGAGGGTATGCTAGCAAAGAAGTGCAGATCCTCTT  
CCAAGCAGTGTAGTTGATTTGGTTCTGAATTTAATGTTTAACTTCTCCCTTACCTTATTTCCAGATTTTCCAGAAATTTAGAAATTTTCTACTAGCA  
ACGCATTTTTCTTCTATTTCTGATACTGAGAATGAAAGCTTAAATTTAGTCAAGGGTTAGCTGATGTCACTAATTTGACCCAGTGTTTAAAGCA  
GATGGGCACTTAAACAGTAACTGGACTCCTTACTGAATTAGTGTAGTATAACTTCTACTTCTAATGTTGCTCCTGTACCACAATTTAGCAGCAGCCTCTC  
AGTTTCTTAAAGTGGCCTCGCATGTTGCCCTAACAACTGTGTACGAGATCTTATAATCTTCCATCCTTATCTTAAACATTTGTAAGAAGCTTTGTCCA  
TTAGTATGTAGATAAATGATTTCTGAGGCACTTCTGTACCACTGACATGGTTCAGATTAATGCTTACCTAGGCAAAAGGTTGTTTTCCATTTCTTACTAGCA  
TTGTGTAACCTATTGACAAAAACGACATTTGTCATCTGTGCAACAACATGAATGGAATTTGTAGTCAATCAAGCAAGATTTAGATGCCCTCTCAGCC  
AAGGTTGGAGTTGCACATTTGAACGCCACCAATTTTACCAATTTTGGGTGATTCCTGTGACAGCAGTCCACTATTGCAAGTTAGCATTTGATCCTGAC  
AATTTCTCAAAAAACATTTGCCAGTGTGGTTATAACAGGGCTATTGACAGATAAATCTTGTATTTGCCCTACAATGGTTTTAGTAGGCAAAAGT  
TTATCCAAGATCAATGTTTCAATTTCTCACTCCATCTTGTCTGACACAGTATGTTTCACCTTTGACTTCCCAGAACCAATTCAGAACACCTAGAAAAC  
TCATAAGATTTCTTTTCGGTGTTTTGAATTTCAATTTTATAAACTGACAAGCTTGGCTAGCATAAAAAACAACCCCTTACCCAGAAACCTGTGACT  
CTTGGCACAACCATGAAACCTGCTTATCCTTATTCGAAGATGGGACAGGCACCGGGCCTTCGGTCTTAATCTTCTCACAATTTGTCATCTTCCGAT  
TCCCGGCAATTTCTGCATCTGAAAACATTCAGTAGCTTAAAATCTGCATCGTTAGTGTAGTAGAGCACACTTTTGAACACTTTTGTCTAATAGCA  
CTAGTCTTAAAGTATAATGTTGTAAGTAACTTCCAGACTGATCATTAACTTAACTTAACTTAACTTAACTTAACTTAACTTAACTTAACTTAACTTAACT  
ATCGTATTAACAGCGCATTTGATCTCACCAGCGGTTGATGGTAAGCAACTCAACACTTTACTATCAACTGTTATCACATTTTACAGGTCAGGCA  
CATGGTATCAAGATCAAAATACGACAAGACTGACACTAAATGGCTTATTCATTGTTCTAACTCTAACTATTTTCATCCTGTTCATCTGCAAAATGG  
GCTAGTCTTCACTCGTTGTGTTACCATGGATCTGGACTTCTGGTGCATTTCTTACATAGTGTCTAGTTATCTTATAGGCTAACTTGGCAGGG  
CTTAGTAAGACATAAAGAGCTAATTTTGGGATTTTATAAATAATGCACCGTAAAAGGTATAACCAAGATTAGAGAATAAATAGCTAAACACTAAAATG  
ACCCAGTTCACAGCTTTGTAGCAATGAGGGTTGGCAAAACCTAGGTAACATAAAGTCACAATGCAAGGCTAAGCATGTGTGTGAATCATAACACGAA  
ACTGATAAGACCGTTTTCCCTTACCATCACTTCTGAAGTACATTACTCTAAAAGTCAAGTGCATGTAAGAATTTCTGATGGCAATACATAATCAAAA  
TCTGTTTTCTGTTCTGTTTATCAGTCTGCAGTATCTGTCACACAAAATGAATAATGTCAAATTTTATGTCTCTTTCAATCCTCAGAGATCTTCTCT  
CTGCAAGAAACCTTACATCCACTACACTGTACTGATTTCTTCTTCTTACTGGAATAGTAACATCCAGTTAGCATGAGCAACAGCATCAATCCTCT  
ACTTTTGTGATCCAATTTGCATGTACAGGTCAGAGCAATCTTACAGTATCTGCAAGAACAGTTTGCATTTGGCCATTTACCAAAACACACTTTTCA  
TATGCTTCACTCCCTTTACATTTGATGACAATCTCTAGGACAGCCACCGTCCAAATGGAAGAGCATAGGTTTGTACATCTTGTCCATGAGCAACT  
AAAACATCCTTGTCCGTAATAGCCATTTTCCACCAATAGAATACATTTGTAATCTTTCAGTGCAGTTCCTGCTGCTTTCATGTTTACCGTTA  
GTAACGTTTTTCCCTGGATGGAGCAGTAAAGTTTTAGACAACCTTTTAACTTAACTCAGTGCAGTGCAGTGCAGTGCAGTGCAGTGCAGTGCAGTGCAGT  
AATCTAGATCCTCAATGTTGCTAAACTCTCCAATTTGGCTTAGTGTATCAGAGTCAACACCGTTGAAAGAGTGTCTGAGGGGCAACAGCTACT  
CTCACACAAGCTTCCACTCCTGATTTATAACTAGCACTGATTTACATTTCTATAATGTGACTTTTCCACAACACAGACCAAGCAGTTTGGATCA  
GAACACACTCCAAGTGGCGTTAAAGAGCCGATTTAATGTTGATCTAAAAGGAACCTTTGACATAAATTTTACTTCAGCCAAATGGTCCGTTTACT  
CCTGGTCCAAAGTCTTCTTGTGATGCCCCCTGCGCTGATCAATTTGCTGTCATGACATTTCTCTTCTTCTTCTTCTTCTTCTTCTTCTTCTTCTTCTTCT  
TCTTTATGTGCTTGAAGGCGTCTTCTAAGAAGTAAAGCATCACTCACAGTGTGTTAAACTCACCTAGTATCTTGGCTAAACCCATGACTTTAACT  
CGTTTCATCATAATTTGTTATGACATAGTCAAAATAAAATTTTGGCAAACTGAAAATAGTATGAGGACCTGTAAAGCGTAATGAGAGTGTGAGTAACT  
TTTAAAGACTTTCATGCTTCTGTTTACTCTGAGCAATAAATCCTTAAACACTGCATAGGTTTACATAACTCCGGGCTATGTTTCTTCTCTG  
TATCCACTGCATGACTCTGCTTCTCATCATGATTCGTTTATGAGGATGACTTTATGATCAGCCTCCGATTTTCAACTTGTGTTTCTTGGAAATG  
GTTTCTGTCTCAGTGGTCAATCTATGCTGAATACTAAATCTAAAGTGCCTTCTTCTCACTCAAATCTCATTCTCTTCTTAGCATTTCTATTCAGT

AAGCCATTTCATTGATGCATGCATCTGCCCTATGGGATCCATCAATCTAGATATTTTTGAGTCCAGGTCTTCATGCCTTTTCAAATTACAACTCGCC  
GCTGCATATATCATTTCAACTGCTCTACTGTTTCATCCCATTACTCAGCAGATCATTCTGCAGTGCAGAAAGATCACTTATCGATACAGTAACCTCT  
CTTCTTTCCGCTTTGACTCCATTCATCATCAACATGAGTACCAAACTCACTCTTATAGAAAATCTCCATTTCTCGTTAAAAATTAGATGTGTTTACT  
TA

>c9500\_g1\_i1\_len=6697

TATAGACTCCTTGTTCAGGAATTTCAGGGGGATGTTGTCACCTGGAGATGAAAATCTCTATCACGATAGTGTGTCAGGCATTCCTATTCCAGAGGTTCT  
GGTTGATGTGCGTGGTGAATTAATCGGGGTTTCATTCAGACCCTGGATGATGATGATGTGGTTTCTACTGTGCGGTAGTAGCGTTTATGGTCAAAG  
CTTGAGTTATAACTTGGGTGATTGGAAGCTAAACAATCTTGTGCATGATTTACCTTTGGAGAACAATTGAGAACAAGCTGATAGGAAGTTAAGTGA  
GGTTTTCCAAAGATCAGGTGCAGAGATCACTCGATTTACTCCTGATCATGTTAGTGAAGAACCAGATTTCAACATAATTTGTTGAAGGAGGCACAAA  
TCAAGGAAGTTTGAGATCAGTTAAAAACTATTACGAAAGAAAAGAAACAGAAAATATGATGTCTTTGGAGAACCATTATCAAAGCTGAGCTTGCAAAA  
TAAAGGGAATGTAAGAAAGATCCTGTTTCGGGATCATCATTGTTGGGCATGAAGCAGTGGCAACAAACTTAGCTCTTTCAAAGAGCAAGTAATTGA  
GTTGCAGATGAGATTTAGAGTAGGTCTAAGAATTCAAAAGAAATAGCGGAGTTAGGCTTGGTTGTAAACTACCAGAAGATGCAACTGAAATAGA  
TAAGAGATTAGAGCAATATTTCTGAAACTTGATTTACTCAGTGAATAAGGAAATAGAGAATGGAATAAAATCAATAAAACGGCAGATAGACATCAA  
CAACCTGATAAAGACTTTCTTGGACTACACTTAATGAGTGGGATGAAAGATAGGATAAAAGAGCTCAATAAACATGAAAGAGCAGCTGG  
CATCAAACCTGCAAAAATCTTCAGGAATCCCTGAGTTTTGTTGCGGAACAGACCACAAAGTATGAGTTTACGAAGAAGCTAGAAGAGTTAAGAG  
CCAACTGCACATGCTGATTTTGGAGAAGAGTACATATCAAGAAATGAGGGAAACATGTTCACTGCAGAGAGGCATTCATTAACCTTCCAAATGAT  
TGTTATTAACCAATCCGAGCTTCCAGGGTGCAGTAGAGGATTAATGCTTAGCGAAGCAAAAATTTGAGACTGTCTATGACACCCCTATATTTATG  
TGGATCCCTGAAAGCAGTAGTCCCTTGTACTTCCCTGATCCCTGATGATGATGATGATGATGATGATGATGATGATGATGATGATGATGATGATGATG  
CAAAGGAGGAATGACAGCAGTTCAAAGATGAAAATTTACCAACGCTTTTCCAAATTTGGTGGGACCTTTAGCCTGAACAACAATATCTAGTAGTTTCT  
GGATTCAGCGCTATCACTTGTAACTAGTGTGATTAAGCAGTCTGAAGTGGCGAAAGACTTTAAAGGTTAAACCTCTAGATTTAACGCTTATTT  
GACTGACGCAAAATAGTTTCGATTTAGCTTAAAAGGTTGTTGAGGTTAAAGGATTAACATCAAAGTTTCAATAAAGGGCAAGATAAATGATCATTACA  
TGCATCAATGATGAGCCAGAGAAGCAAAACAGATTTGGTCCACATAACAGACCAACAACACTGATGACATGATGATGATGATGATGATGATGATGATG  
GCTGTTTTATGGAATCACAATCTACTCTTCCAGAGACAACATAAGTACAATTTATGGCAAAGTCTAATCAACCAAGCAAGAGACTATCATGTTG  
CAACTACTTAAGGTTAAAAGAGGAACAGCATCAAGCGTGGTTGTCAAAAATAAATTTTTAATTTGGTGCAAACTAATCACAGACATAGGGACTGA  
AGTGACATTTAGCATGAACAACAACTGCAAGAAGGATGAATTCATATTTAAGAAAGTTGCAAGATTTCAATGCTGTGTTACTTATAAAACCAACTAA  
AAAAGAGGAAAAAATATTTCTTTCAGTCTTATTTCAAGAGAGGACATGATGATGATGATGATGATGATGATGATGATGATGATGATGATGATGATG  
TGGAGAGAGAAATTAATTAACAACAACTTTATAAGTTTAAAGCAAACTCAAAGTTGCTAAACTGGGTGTTAGTGTGTTAGTGTGTTAGTGTGTTAGT  
TAGGTTTTGGAGCAATTTTTCTAACATCGAACCTACAGCGAACAGAACATCAGAGATTTACCAGAACCGCATCCGCCTTCTATGGGTTTTACAA  
GAATGCAATGCCAAATGTTGATTTCTGAGCATAAATTTAGGTTGACAGATAAAACTGAGGTTGAAGAAGAGATAACGAGAACAAGATACATGGTAAT  
GGAAGCTTAACAGAGTGGCCAACTGAACCCAACTTCAAAAATGGCTAGTAAAGCAAGCATGGCAATGAGAAGCAGGTTAAACATATGGCTGTA  
CAGAAAACATAAAGACCTGTCCACAGGTACACTGCTACACCCCTAGAGCAAGAAATGAGATGTTACTGGTCAAGAACTAAACTGAGACTAGTAA  
CCAACTGTTCTGGGAAGGATTTGTTAACCCCTACACAAATTTCAAATAACAACAGGTCAGCAGGTAATAAATTTATCTATTTAGGGTACATAAA  
GAATAAAGACGAGACAGCAAGCAAAATAAAGCAAGCAAACTTTATGATAAATAATTTGACCTATGAAGTCCAGTATAACCTGAAACTGCTAAGAT  
ATTTGGCTTGACGCTCTCCTCAGAAGCCAGACCACATGCTTTGATTTGGATCTTCTTATTTGATTTGGGAGGAACCTAAACCATAGAATAAATGA  
GTCATATCCAGGATTTAACTACAACCTTTATGAAGAACTCATAAATCTCATGTTTTGTTTTGCGCTCAGTGGAAAGAAATTTTTCAACATTAAGGCTTC  
TAGCAACTTTAATGAGGAGCTGTATGATAGGAAGAAAGTTAGCAGCAATACCAAAGGGCAAGGTCATTGAGAAGCTAGCACTAGAAGGAGAAGG  
GGCAACAAGCATGCTGAGCTGTTTGGAGAAAAATACCTGAACGCTTTGAGACTCAAGAGGCTTAAACATAGATATATTCAGAAAGCCGAGCATGG  
AGGAGATAGAGAGATCTATGTCTTAGGTTTTCAAGAGAGGAGTGTTCAGAGCTTATAGAGCAAACTCTTAGAATAATCTGCAGGTTCACTACCTGA  
GGAACAACTGACTCATCCAGGAAATAAAACTGCTATCCCAAGAAATAGACTCAAGAGGCAAGAACTAAATATAAATAATGGCAAACTAACTTTAA  
CAGCTCAGCAGACGCTCGAAGTGGAGCCAGAACAATAGCAGCTTAAAGATGATGATTTGCTTACTAATTTATTTGCTCCTTATTTGCACAAAAC  
TATCATCAGGTGCTTACGGTTGTGGGAATCAAGCGGATCCTAATCAATCTCAAAATTTTGGAAATGTTTGGACAAATATAGAAACCTAAAACCTGTA  
TGACAAAACCTTACAATGCATGTTTGTATGATATAAAGGACTTAAAACATTTAGATGGATACGAGCAGGGAGTCCCTTATATTTAGGTTGACCAAG  
AATGATCCAGGATTTAACTACAACCTTTATGAAGAACTCATAAATCTCATGTTTCAAGCATAAATTTAGATGGATACGAGCAGGGAGTCCCTTAA  
TCAGGAGACTTTGAAATATCCAAGGCCATTCAACTTATAATGTGTCAATTTGCAGTCTTCAGATGATTTCTACTTTAGCGTTAGTGCACCTTTAAC  
AGGAGATGCAAGTATGCCACAAAATCAGTATTTTGGCTACTGCAATCTGCAATTCAGGTTAATTAATCTCATCGCATTTGCGCTCGTGAATTC  
GATTAAGACTGTTTTAAACAGCAATCATGTTTTTGGATTTAACTCAAATTCGAGTTTGGATTTCAATCATTTACAAGCCTGATATAAAGGCTATAT  
CTCAGGTTCTCAGTGTCCAGGAAATAAAACTGCTATCCCAAGAAATAGACTCAAGAGGCAAGAACTAAATATAAATAATGGCAAACTAACTTTAA  
TTACGTTGCTAATGGCTTACAACCTGGCCAAAGCTACCTACACTATCATCTGATGGGTCTCAACAACAAGTACTTCAGAACATATGAGGTTCT  
GCAAACTATCTACAGATCCTAGCATTTGGTTTTTTTGTGATGGATAACCAATGTCGCCCTGGATTTATGGGTTTTAAGTATGGACTATGGAACT  
GGTGAATCCTCCAATCTAGGGAACCTGTATAAACATAAATTAAGACCCATAAACCCTGACAGATAAACCCTAGAAGAGAAATGTCAAATCATCAAT  
TGAATTAAGTGCACATGTTTCCCTATCAGCATCATCAAAATGATGATGATGATGATGATGATGATGATGATGATGATGATGATGATGATGATGATG  
CCAAGAATGGCGAGAAAAATACAGATGAATCCAGAAATATTTATCAGGAGGGCCCTAAATCCAGAGGAGGTTGAGTTAAGATTTACAGAAAAAT  
GCACTCCCAGGTTTCTGCTTCCCTAAGCAAAATTAACACAATCCACAGCATCTAGCTGAGAGCGCATATGCTCTAAAATGCAAGCTGTTAC  
ATCATTTAGTAACCTGGATGATCCGAGCAGCAGTGGTTTTCCAAGTTACATTAATAGAGGCTATTTAAAAGAAATGAAGGAAGTGTAGCTAGCTGA  
CGATGACATAAATGAACAAGAGATGCGGATCCTATTTCCCTTCCATGAGGACTTCACTAGAAATCAACAACCTGCTAAGTGGTGTTCACGCTGTTCA  
GATAGGTCAGTCATTTAGAGAATATAAAGGAAGGTCACATCAGTTGAAATAGCCACCAACAATGAATATAGTTTATTAAGTCTTCGGGAATCTT  
GTTATCATTTCTGGTTTGAATAAACAATGATATCATGACTCCTCGTTGAGTAAAGAACAATCGAGACTACATATTCACACAGCATCAGAAAGTGT  
TCCCTGGATAAGGAAGACATAAACAAGATCATTAGCAAAATCCACATTAATGAGATGGTTGAAATGCTACTATGGCTCAATCTTTTTCAGGAAG  
GAGAAGGATAGTGAGACTGCTAGGAACCAAAATTAATCTCAAAAACATGCTCAGATGAGAGGTTGTTATCATGCTGCTAATTAACAACCTATCATCTTCCCA  
TAGACTAAATCTCGATAGAGTAGAACTGGAGAGCCAGTTGATTTAATCTCCACTGTAAGATCCAAGTTACACTAGCTAGCTCGCTACCTGGGGA  
TCATATTTGATATCATTAAGAAGAAATTTTTCATCTGCAGGAACCCAGGTCACCTTTCGTTGAAGGAGCTGTTAGGTCAAAGCAAAATGACGTTGTGCT  
AATGTGTAAGTTGGCCAGGTTCAATGATAAAGGCTGGAAGGAATCAAACCTGATGAGGCTTAAAGCATTATTAATGATATAAAGAAATAAGCA  
TGGGACATTAAGTTGTTTTACGACAAGACAGAGATATCAACTGGCAGAAAGATGGAAGTCCACGATATCATGTTTGGGAGTGTGGGAAGGAATCAT  
TGACGGCTATGACATAATGATTAGGATTAGGAACACCATTATAAAGCCTGTAACAGTTTCAAGATGTCACAGTAAACACACCCTAGCATCAGTTGA  
GTCATAGCTGTTGAGAAATTCATGAGAACATGGGCTGGGTTATTCGCTGATATCCACTCAGGAAGGTTCCACCTTGTCTTAAATGATAAAGG  
CTTGAATCCAATTCAGGGTGGCAATAATAGTGGATGAAGGCTACAATGTAACATAGCCGAGTTTATAAACTACAACCTAACCTTAGAGTGGAC  
AGGAGGAACCTTAGATCGGTTGCAAAAGTTACGGAAAGAAACAGCTGAGGCGTAAACATCAGCTCAGCCCTAAGCTGAGCCCTAAGTTCAACA  
TGAATATATGGCAAAATATGAGAAAAATAAGGTTAAGGGAACACTGGGAAACCCTGGCTCGAGAATAAACCCTCTTAGCCAGTCTGCAGCAGTGA  
GATTTATCCGCTCTTCAATGAGCCTCTAATGATGAGAAGAAATTAATTAGAGCTAATCTCAAAGCTAAGCTGCAAGCCAAAGAAATTTCTGTTAG  
GAGAAGATAGATTAAGACTAGCTTTCTGATCAAAAAGAAAGAGCAGGATGAACTTTGGATGATTTACATGCTATTTCCAAATGCCACTGGACCT  
TGGTGAATTAACATAGTGCATTTGCAAGAAAGTGTCTCTGAAAATTTGTTGAGTTGAAGACTTTGAGCTGAGGAAATGGAAGAAGTGTGAAGA  
TGATGATATTTGCTTAGAGTTGAGGAACGCACATCAACAAATAGAAGTTATTAAGAAGAAATTTGGAGACTCCACCCTGTTCAAAGACTTCTC  
TAGCCTGATTTATTTCTCAGATAGGAGGGATGCAATAAATTAAGCTGATAACTAGAAGAGAAATATAACAGAGAAATGAAAGTTATCTACCAGTTTT  
TGAATAATACTAGAAGAAGATAGCTCCTCTGGACTTTAATAACCCATCAACATGATGAACTAGCTGGGACGCAATAGCGAGGACTCTGA  
GTAATCGAATTTGCAATTAGATTTGGAAACTTAAGTTTTGAATTAACGTAGAAGAGTATGTTTTAGCATTTA

>c25711\_g1\_i1\_len=2417

CCGTATAAACACATCCCTTTTCAACAAATGACTAGCGAAAACCAAGGAGGATTTGACAAGAAGGGCCTTCTAGCATTTGGCGGAGAAGATCATTTCCAGTAAATCAAGGACCATTTGATATTTCTCAAGGATACCCCGTCTGCAACTTAAAGACCGTCCAGAGAAATGCTAAGAAATCTAAAGGATCCAGCGCCCTCTGCAGAGCATGATTGCAGTAATAGGAACAAAGTATCCGCTTTTCAAGTTCGATTCTGCGAAAGCAGCAAAGCATGGCATCCCTTGCATTTCTCGGATAGAGATGATGCACATCAGTTTGGGAGGAGGCGTTGCAAACTCGAGGCGGTGCGGTGTTCTTAGAGAATCGGCACCCAGATGAGGGGATCAA  
GGAAGCCATAGACATCTTGTTCAGGGCAAAGAAGGCAGAAGTGCAGGCGCACTACTCGGTACCTTGGAGAGAGTCCAGAGTAAAGATTCGGGAAGACCTGCCTGCAGAGCATGTTGTGCCAACCCAGGAGGTGATTAACACCTCGAAGTCCCCATAACCAGCGTGTGCAATACCTCATGACAGCGTTAATGCCTCACCTCTCGATCATGTACCCGAGTTTGGATCCACCATCGTGAAGGAGCTCAAGGTGCTTAGTAACCTGAGACTCGAGTCTAAATGACTATTTAGTCCAAATTACGGATTTTGTCTCGACCTGATGGATCCAAAAATGCGCTACATGCCTGCCTTCCAGAGTACCCCACTCAGTCAACAGGGTAAGGTATGT  
GTATGCCTCTGGGAACCACTTGATTTCTGGTTCCAGTGCAGTGCAGATAAAGGCATCTACACGGAGATCTTGACACTGGTTGGCAAAGTATGTTGGTATTTTGTGAACAACAAAAGGAGTCCAGAGGAGATAAGAGCAGTTTTACAATGTGACATTCAGAGGTGTGAGCCTTCTCGTAATCATCCA  
TGAAGAGGTTGACACTATCAACATGTACTTGAAGCTGCTGTTCGCTGTGATGGGGCTTCCCATTTTACGTGGAGAAGGTCGTAGAGGATACACTTT  
CACGCCCATCAGTGGGAACATGAGGCAGGAGCTCACACGGAACAGTGCAGGGACAAGATATGCAAGTTATATCGGGACAGAAAAGGTGCAAGTAAAG  
GGTGAAGGTTTTATAGCTAACATCACGCCACGAAGATGTAATACGCGAATCGTGTACAGAGATGTGATTTCAACATATTTCTGCGTGCCTT  
GGCAGCTACAGACGTGATTAAGATTTTCAACATTCAGACTCGAGCGATGGAGGAAGAACAATCGAAGTTCGAAGTTCAGACTAA  
GGACCCAGCAAAGTATTTGAGGATGTCAAGAGAAGATATAAAGACAGCGTGGAAAAGTGATACAGGATACCGCAAGATAGCATTTGAGGATTACAT  
CGAGCTACCCCTAGGGCGCAGAGGTATGTCACTGTAGAGGGGACCACAATCCACGTTAAGGGTGGTCAAGACTTTAACGTCCAGAAGCCGGAAT  
ATATCCCTGCTTCCATTTGAGTTTAGATGCCAGAGGAGCTCCTAAATGATTTTATGTCTCCCTTGTGATGTTAAGGTCAAAAATTTGCTTACTA  
TGTCCATGAAGGAAATTTCTGATGATGATGCGGGGGCTCAAGTGCAGTATGGAATGGACTGGCTCAATGAGTGCATATGGAAAGTTCGAAACCA  
ACAGCGTATCCAGTGGCAGTGAACCGCGGTTATGCATTAGAGTGGTCAATGGAAACAGGGATTCGACACTATTTGGCATATTTGTATTTGCT  
CTGCCACTACAGGTTGCCGATAGCAGGTGAAGTTGCTCAAGACATTTAGTTTAGATTTTACAACAGTTTGGGTTGCTCACTGTACCTAACTACCC  
TAGCGCCAGTGTGGATGGGAATTCGCTACGCGAGGAGTGTGATCGCCAGGTACGAGGAAGGTGTGTTCACTAGCTTAATACCAATATTTCTT  
AAGAGGATATCGCTCCTGGAGAATGATGAGCCCTCAAGATTTACCAGTACCTCGTCCGCGGAATCAGCGCAAACTCAAGCCAGGATC  
CGTTTTGAAGTGTCTTGTTCGGCAGGGAATTTCTCGAGAGAGATTGTTCTTCGAGCTGTCTGTCCAGAGAACCATCGCAGTTCGGGACCCAG  
TAACATCAATTTACCGTCTGCCTTGTGAACTTGTCTCGTTGAATAAGAGGGTTCACGATGAGGCCGACATTTCAACAGTCCCTGTAATAAAGCC  
AAGGTGTGAGGAGGTGCGCGGTGAGACTCCGACGTTGAGGACGTGGGTTATGACATACAGGACATGGATGAAGATATAGAGCTGGACGACCTTTA  
AAGTTTTAGAAAAAGG

>c45853\_g1\_i1\_len=203

GTCTGTGATGCTTCCAAATGGTGCCAACGCCATCATGTCTCACATTTTGCATGCATGTTGGTAGGTATAACCCACCATTCTACATAATTTTAT  
ACTGCAGAGCTTAAAGCTGTGACAACAAAAGAATCAGTTTCCCTTTCAGTTGGTAGCAACATTTATGGCAAACAAGAGACATACACAACCAA  
TGAGACATTTG

>c2560\_g1\_i1\_len=2481

AAACCACTTAGCGATCAGCAAGGAAGTGAATCCCCCGTGCACCGAGCGCAGAGCGCTTGGGTAAGTCGATCACAGCCTGGGTGGCTACAACAAA  
CCCGAACCCCATTTGAAGACCATCGCCTGGAGCCGGTTTTCTGTCTCGTAGCAGGACGAGTTAAAAGCTTCCGTGCATCCTCTCACTAACCGTGAA  
GACAACCACCATCCTCACTACCGACTGTTACCGGATCCGCTAACCGGACGGGCGCAAAGGGTAAAGGAGTCCAGGGGATAATTCACCCCTTGGG  
GACCACTCCTAATTTTCCACGGGGGAGTGCAGGTTCCCAACCCCTTATCCCAATTAACCGCCGATTCGACGCTGCTTCGAGGTTACTCA  
TGAGGGAGGTTGCTGCTCCGAGCGCCGCCAGGATGAAATTTCTATACGTGGCCCGCCAAAACGGGTCGACCAGGAGTTACATCCGTCATTC  
ACTCGGGTCTCGCTCTAGAGCCGTAGGCACCCAAACCTTTCTGTGGGAGCCACTAACCCAAACCCGAAAGGATTCGACACTCCGACGGGATTC  
GTGGAAATCCATCGACGCACTATGGGTGCACCTTGGTACAGGTTACAACATCGTGGTCCACCCGCTTAAAGGCCATCCGATAAATCGGAAGGCG  
CCTGATGCGCTTGGCATCAGACACCCAAAGCCGAAAGTTGGTCTCCCAACAGAGACATCGACGGCAGGAAATATTCCTTCTTTTGCACCCCGCT  
GGTAGGGCGCCCTCCGACGAGCAGGTTCCACGAGCTCGCAACAAACCGGACTGCAGCTCGTCTTGGGAGACACTCGGCCCTGCGGAGCTT  
CCTTCCCTTCTTAGGAATCAGGAACCTCCCTGTCCAAACCATCGGAGCGCCGATTCGACACTTCAACCCGAGGATTCGACAGGAGGATTCGCG  
AGGCAATTCGGGCTACCAGCACTCTCTCCACAAACCGGCTTTTGAAGGGCTTCAACACCAACCGCCATCCCCAATCCTCGGATACACGAACG  
ACCCGTGGAACGGATAGCATACGCTCTTTTCTCAAGAATAGCTCCGCTTGAATCCGTTGCTGGCCAAACAAAGCCAAAGGCAAAACCGCGGAG  
TGCCGAACCAACCCGGAACGACTCAACGGGCTTCGACAACCTCCTACCCGAAAACGGGTACCAGGCTAGGTTTACGTCGCGGATGAGAGCG  
AAAGAAGTTCGAAATTCACCGAAAAGAACCGTGCAGAGACCATCGTCTTACCTCTCGGACTTCAACCCGACTTGGGCAACGAACTCCCTCTC  
AAGGAGCCAAAGGAGTCCGGTGTAGCCGATTTAGAGGGCTTATGAAGGGTCTAAGCACCCTGGTCTCGCATCAGAGCGAGTTACCATCCTGTC  
CTTCCCGTCTCAGTAACAACCAAGAAATCAACGTCGCGACACAGTGCAGATCGTCCCTCCCTTACGTAAGCAATCCCGAAGGAAAGTCCACG  
ATCCAGGCGAGAGACCGAGGCGGCTTTCGAGCGCGGCTTGGCGACAGGACTTGACCGAAGGGGTAGAACCCCATGCAAGGTCCTGATACTG  
GAAATCCACCCAGGCGGGAAGCACTCGCTGCGATCCGTCGACATGGCGGAGATAACACCGCCGAGGTTACGTGAGCAGTGGATGAGGATGCAAG  
TCTTTCTCTGTGCTGGACCTCAGCTCATCAGCTTTACCAGTCCGAGGACGACTTCCGGAAGAGGAAGAGACTACCCGCGATAGACATCCGTTG  
CGAGGCGAACAACCTCGAATTCAGAATACCACGGGTGAGACTCCGGTCTTCAAGAAGACCCGAGCAAAAACCTTTGGCCAATGGGGCGAGAA  
CGTCTTCTCAACAACACTCAGGAACCTCGAAGCGAATGCCATCAGGCAAGCCCGCAAGAGGACGCTGCGTGTCTCGGAGAAAAGAGACGCCAC  
TCGTCAGCACCCGAAAACGACGAGGATTCACCTGCGGTGACCATTTAAACGTTGATTACAACGTTGAACTCCTCGGATTTCA

>c6975\_g1\_i1\_len=1806

AAAATCCTTGCATCATAGCTTTCCGTAAGTACGAGGATCAGTGCAGTAAACATCGAGATGACGACGTCACAGTGTGTCAGCAAATCGTTTCGCT  
GGTTCATTTTACCAACCACTCTCCCGCTTATGGGAACAGTATGTAAGTGTAGAGGACATTTATGGTGTCCGCTTCCACGCGTGTGTTACAG  
GGTACGATCAACTTCGCTCGTTTTGCGAAGGTTAATTTTAGGAGATGTTTACATCAATGGCAGTCTGTAGTTCGTCGACTGTCTGCGGATGC  
CGGTTTGGATTTCGCGCATTCATTTTCTATTTCTGTAAGTGTATTCAAAAGGAGAACCTCCTGTCAAGGAATACGTCGAGCGCTTGGCGACACT  
CAGTCGCCCCGACCCAAATCAAGGCTTTCGCTTTGAAATTTGGCGGTAAGTTGTTCCCTGCGGGTGGGACAAGAGCTACCTTCGGCATCTG  
TTGATCCTTCTTACCTTACCTTGTTCGGAAGCTTGTTCGGAAGCAGTTCGATGAGTGGTGGTCTAGAGGATGGAGCTACATGAACGTTAGGAACGTTGAG  
GAGTTTTGTTTCTACGTGATTGACTCGGTCGCTCCAAGACCTAGGGGTGTTTTCGAAAGTACAGGCCATTTTACTTCTGGCAAATGGCGGATCATA  
TCTATCCCTCTCGGGTCGATAATGCTCTCCGCCCTTTGCACAAGGCTATGTAAGTCTCACCTTTCCCGTTTTTAAAGTGGCTTCTTCGCGGGGACCGG  
AAGGCTGAGGCGTTCAAGAATTTCTCGTAAGGACGGGAAATCTTGTAAAGTGGCGACTACGAAAGTCCGACGATTAATTAACGCTCCCTC  
CAGGAAGCATCTTAGATAAGTTGCTGTGCAACGCTTCCCTTGGTGCCTCCGGGACGAGCAGGCTTCCAGCATACGTTTCCAGCTAGTGTGCTGGTA  
TGCGACGGTTCGAGTACGTTCAAGCGCGCGGCAACTTATGGGACAGCTTACGCTTTTCCCTCTTGTGCTTTATAAATATATACGTTTCGG  
TATTCATCCGCGCTCGGACGTTCCCGTCAAGGATTAATGGCGACGATATGTTTTCTGTCGCAACGCCGAGGAAACGTTAAGTGGGACGTTAAC  
GTAGCGAAAGGAGGACTTACCTTGTAGTGTAGGGAACCTTGAAGAACGAAAGTCTTTTACCCTAAACTCAACCCCTCGAAGGACTAGCTTCG  
GGAGCTAGCGGTTGAGTTCGTTGAGGGCTTCGGCCCTTTTCGATCAGGAAGCTTTTCCGATCGGATCGTGTGAAATGGTAGGTTCTATTCA  
GCACAAGCTGGGTACGGTCTGCGGAAAGCTCGTAGTTCGGCGGGCTTCGTCGACATCAACCAGCAAGCGATCCATGCCCTACGGCGGTGCGTT



ACAAGAGGGTTGGGATTGGCTGTGGAGAGGAATGTGCTGCATGACTTGCCTTTGTGGCACCGGGAGCTGTTCTACCTTGAACAAGTAGAAGAGCGA  
ACCGTCCCCGCCTTCGCGAGGGGGAGCTTCCCTCAAGGATGGTGCCAGGTCAGCCGCAACTGGATACCGGAAACCGAAGCTTATCCAGGAG  
GCCGTGGGGTGGGGTTCGAAACATGCCTGGTTTCATCCTTTTCACGTGAGAACTTCTCGGAGCGGAGCAAGTTAGATCAAATCTGGGAGGGG  
TGCTCTCCCTACGGCTTGGAAAGCTTGGCTTCGGCCAAGGTCCTAGGATGCTGAGACTCTCCCGCAGGAAATGTGG

>c13763\_g1\_i1\_len=747

CTGCCATTGGTTGGGCCCTGTGGTCCCAATCTTGGAGTACGTGTACGTAACATCGCATTGCGTTGTACGCGTTCCACAAGCTTACTGTTGCTAG  
TCGTTTGAACGATTTCGCGGCTGTCTGTCTGAGCTCTTCGGCTTAGATTTGCAGGTGCCTTCGTTTACTAGCAATCAGCAGATTAAGGAGTTCTC  
ATCGGACCTCCTTGGAGGCAATAATCACCCCTGGAGGGAGACACTTCGTGGTCTCCTATTCGTACCCGACACTCGGTGGCCTTTTCTTTGTTTCT  
CTTTCGAAAGACCATTCCAAGTGAGGAGCCCGACGTGGGCGCCTACGTGAGGAAGATGTGTTTATCCCAGGAGGATCCTGACCCGGTCTTCTCCTGA  
CTTCTGTGCGACTGAGTTTCGTGCGATGTTTAGAAAGGGGTGGGACGCTTCTTATGAGCGTCGGGCCAGACTACCACCTGCCTTTGAGCGCTTG  
CGCTGAGAGTCCCAGTCTCCGGTGGTTGTCGAGGATTGGAGGCTTCGGAGCGGATAGATCGTACAGGAGTTCGTCTCCTACATCTGAACTCTGT  
GGTTCATCTCTCGTGGACTTCTAAGGTGTGTTCCGTTAGAGACGGGGGCAAGTGGCGTATCGTTTCGACTCCACCGCGTGTGACACACGCGTT  
ACGCCCCCTTACACGTGCTCTACGATTACATCTCGCGTTTCCATGGTTGTTGCGCGGTGACGCCAAGCCCCG

>c45380\_g1\_i1\_len=320

GGAGGGGACGTCCCGCGGACGCAGAACTTAAAGGTGAGGTAGTTGACAAGACACAACAGAGAAAGGACAGAAGGTTCCCCATGAGCTGACCAC  
GACGCTGAGTCCCCGACTCACCGCCACCTTCAACGTTGTCTCCAACGTAGAGAGGGCATGAAGAATGACCGCCGAGGGACGTTCCGAGTCTTCT  
GCAATAGCTCAAAAGATTTGTCGCTGAACCTCAGAATTGAGGTTGTCTAGTACGGACTCGTAATCGCCACTGACAAACACCTCGCCGACTTCT  
TCTTAAAGGACAAGAAGCGGCCGGCTTGCGC

>c17450\_g1\_i1\_len=431

TGTCCCAAAGATCTTAGATCTGTAAAAATAAGATTTCGAAAGTTATATTTATGAAAAGTATGGTTGATCGTTTAAATATAGGTACATTAGAGTC  
TGCTATCGAAATGATTGAAAAAGATCCTTTAATATATTTTGGTCGACATACCAGTTGGGATGAAGAGCTACCTAACCTTGATATCAAAGTGTTTAG  
TCTTGGAGTTAAAGAATCTATAAACAATGTTTCTTCTTCAATGCGTCTAATGGCTGCATCTGCATACATGATAAATCGACCGTGCATCACAATATT  
CGAAGGAAATGCAGTTAGTAAAAAGTCACTGTACTCTGCTTTAAAAAGATAAACTAAATGCATCTAATCATCTATTTAATTTCTGTTGAACTTTGTC  
AAGAGCATTTCCCTACATGCAGAATATGAACCTTTTATCAGGGACA

>c50950\_g1\_i1\_len=313

AAAAACATCCAAAGCATAAGTGAATTTGAATTTGAATTACCAGATGTCACGCTGAAAAATGTATATCTATTATATAGTTAGCGTGG  
GATTCCTTAGGAGGTTGCATGAGTTTCTAACGTTTGCAGGACGTAACCTTTCAACACGCGCTCAAGCTTGATGAAGGCATTGAAAGAAAACCG  
TGGCTTTACACCTTAGCCGCGACGCCAAGTTTCACTTGTATCTAAACAGTGCCTGTTAAGAAAAGCATTGTCAAACAGATTTCAAAGCTGGG  
CGGTATTAAGGAAGATAGTTTCAAG

>c24059\_g1\_i1\_len=313

CGATGCTCGTCCAGTTCGAGCTATCAAACAATGTAGCGTTTCAGACCTCCAGTCTGAATAGAGACATTGCTTTATTAGCATCGTCAGAAGACACAGT  
CGTTAGTTCCGCGAGTCAATTGGTTGTAGTGAACGTTGGTTGTGTACTCAAGCGAGTTATTGAAATAACGGTCATCATTAATACCCATTGAAAGAAT  
GGGGAATAGAGCCGTTTTCAGTTCCGCGACACACGAGATGTGTGGTACTTTCTCCGCCATGGTGTGTTTCATACACTTCATAACCATCAATAACATT  
GTCAACAACCTTACGAATGACGCTC

>c28122\_g1\_i1\_len=369

CAGAGTGTCAATTTATCACCACGCTGATGTATGCACTCGTTGCTCCGATTTTTCAGTATATCATTGCTATGGATGTTGCGGGTAACTTCGAGTTA  
CCAAGAATATAGGACATGCTAAAGAATGAGAGCGGTGCGGCAAAACAAAGTCAAACAGTATTTTCGCAATGATCTTGTCTGTCTATATGAGCTTCA  
AGTTCTGTTCAACACAGATTAAGTGCAGGAGTTGACTGGGAGAAAGAAAGGATAACCGAGTTAAATCGAATACAGTCCCTATTCCTGCAGAAGTGGT  
TTACCAAAACGCAACCTGGATTTTCAAATCAGGGTTGAGTGAAGGTAGAAAGCCATTGAACCTGAAGTGGGATGATTACTG

>c31620\_g1\_i1\_len=321

CTTACTGTGGTTAATGCAATGTATGCTCCCTTGCCCTCGTAGTGTGAAGCACATGGCTGGATTTCTCCTATTGGTCAAATCTTTATGCCTAAAGTT  
TCAAGTATTCGTGGTTTTATGGGTGAGTGCACAGGGCTCGCCCTACGAACCTCATCCTGACAGGGCGTTGACTTGGGCTGGTTATGCTAACCAA  
CCCAGCCGAATGTTGATCCATGCTATTGCTGCATGCGAGGCTTCTACACCGGCTGTACGAAATCCTTACTAGTAATCCTTATGGTGTGAAACAC  
TCTTTGTACCAACTAGGTATTACTAGCTTCGAG

>c32294\_g1\_i1\_len=309

CGTAATTAACGCCATGTTTGGTATTTGGCGGGCAGGTACAAAGTATTAACAGAGTACTGAGAGCCAAAAGCAATACGCAAAGGGTAAAGAACATTCAA  
TTTCGCGGATAAGAGTACAAAAGATGTTGAATTCACGGTTGGTAAAAATTTCAAGGTTAGGACAGTAAAAGTCAAGGTTGGATAGATTGCTTTTTCGT  
CATATCGCACAAATGATGAAAGATTGGTTGAAGTTAAGGCCCTTCCAAGGTTTCGAAACTACGCTTAAAGGAAATTTCCATAACTGATGTTGAGATGTC  
CATCGTCATAGAAGAGATCAG

>c33879\_g1\_i1\_len=403

AAAGTTCTCAGCTGTTTGGCCACTATCAGACCCATGGACCTAGCTTTGGCTACTGGCGCTTCAAAGCCTGATCCTTTCCATGCACCGTACAAACCT  
CTATAAATGGCGATACGCACATCAGTTTCGAATCCGGTCTCGTACCTGATGAGGTCAGCTCAAGAGACGTTAAGCCTTCAACAACAACCTGCTTA  
CGATCCAGTTCCCTTCTCGAAGTTAAGCTTCTCCTTTACTGCAGTATATAGGAGTTAATGCCAGACTCGAGGAAAGAAATTTCTGGAGGTAA  
TAGCTATCATCAGGATGACACGTTAAACGTTGATGTTCTTCTCGGCAATTTGGTGCATCTTTACAGATCCCTCCTTGCACAGGATGCGTTGTG  
AGAATGCACCTCAACAATTT

>c42138\_g1\_i1\_len=440

AGCGTTGAAATTAACGCTCATGATTCAGACTATCATGAGTCCATTTCCGCTGAAAGTAACTGCTCCTTGGCTCAAATATGGCATGTAGCAATCAAT  
CCAGGCCCTCATAACTGCCTGCAATGCTTGAATTTGAATGTTGACTATTAAGTTCGTCATAATCGAAGCAAACAGGCACTGTGTCTTTAAATTTGTG  
AACACTTGGCATCAGGATTCGGTTCAGTAGCGAATTTGCCAACTGGGAAGCAAGAAGGTAAGTGTCTTACAGTTGCTCATTGCAAAGTCAAGCATG  
CAAGAAAGAAAGTACGTCACAACCATACAAGGCAGTACTTTACCCATTTCATCTTTGTGCTAGTGTAGTGCAGAAAATTTCAAGGTTGGCGTGGAGT  
CCAGTAAGAGTGTCTCTATCTCGCTGTCATGCAAAACCAACATGATTTAAGCTTTG

>c45664\_g1\_i1\_len=401

GGAATTTGTGAATTTTGTGTTTAGGTAGAGAAGATGCGAAATCGAACAGCAGTTGAGGATCAACAATTTGGCCTATATTCATCAACTTGTGGTACAA  
AGTTGTAGAAATCTTGATGGTTTTTCGAAAGTGTATACCGGAACGTTAGGTTTCCAGAAATCATACCTCCGGCGATTGGCATAGTTGACGGTGTGTAGT  
TAGAAATCGACTTAGTATTTACATACCAACACACAATGTTGCGTCTTAAATGCGCAAGCCCATACTTTTTCATCTGTGATGGGTAGTACAAAAG

GATAATCAACGTTGTGTGGACAATCATCATTAGAAACAACATCAAAATATATTTACAGTTTTTCAGGCAACGAGTTATCTAGGTTCTCATCTA  
GGTACATAGGAAGCTGGG

>c50237\_g1\_i1\_len=391

GTTCTACTTGACCAGCTCACCGGTCCTATGGCCAACATTCAAGCCAATTTCAAACGCTTCATAAGAGCGTTAAATATGGAATTAAGGCAGATGTT  
GACCTTAGTCTTACTGGTGTAGTACTCATCAATTAACCCGGCTGGTGCCTCTCTCCAACATGCTGAGTCCTTTTGAATCCTTAAGGCTCAC  
GTGGTGAAGATGTGCCAACTTTTCAGGAACCAATGTGAGGTTTATCAATGACGACGGTTCGTATCGACGAAAAGTATCTTTGATGCTCTTAAG  
CTTAACAGTACTTTTCGTACGAACACGATCGCCGCAATCTCTCTCTCATTGCCACCCTTGGTAGTGAGAACCAGTATCGGTTCTCATCAACATG  
CTCCGCT

>c25217\_g1\_i1\_len=311

ACCGGATCGCTGCAATAATTAATGGTCCGTTTGTAGTCTGGATTGTTGTAAGATAATGCATTCGTTAAAGTTGACAGACAATAGATTAGCCAGATTCC  
GTCTGTAGTTCGGCATGGTAGTTGTGCTGTAGTGGTTTCGTGGGAATCCTAGGATGAAATTCGGATCGGTTGTGAACGTGGTCCGGATTGTTCTTCG  
TTAGCACTGTCATTAGCTTGTTTATAAGACTGTCTACTTTAGTGTGATGTCGCTCATTGAAGATGCAATAATCACCAGCTTGTGCAATCTCAGGG  
ATGGTTCGGTTTCGAGCTCCCGG

>c18669\_g1\_i1\_len=952

ATAGTAAGTGAACATCCCAAAATTCAGTGGTGCAGCACTGACTTAATTGAGAATCTGCACAGTAAGGGATGTCCATTTATGTAGCAACAGCAGTT  
ATGAACCTCAACCTTTGACATTATCTCAAAATTTGGATCCACCTTCTTCTGTAGATCTCAAGAACATTTGGGATCTTCTGGTAGTCAATTTGATAGA  
GGCAAGTCTTGAAGAGCAACTTAACATCTTCACTAGGAACAGGAGAAATGTGCCCCACCATGGTGAATTTACCTTGATCATCAGCCAGTGTCT  
TTTAAGTCAGGGTCTTTCAATTCAGAGATCTGGATGGACTGATCTAGAGAATAGCAAAGGCTTGCATCAATAGTGTCTTTTGTAGATTGATGTTG  
ATATTTCTGGGGATCGTAGCAGGGAACACTTGAACCTGGAGATAGTATGGCAGTTGAGTTGATAGCATAGGTCCACCAGGAAACTCCTTTGGTCCA  
AGAATATTTGCTGTCTTCACTGCAAGATCAAGGAACTGACCTACTGAGGAAAGTATGATCAGCTTCTGACTTCTACCACCTCCCATC  
TTGATTCCTACTTCCACAAAGATTTTCAATGTCTGTCTTACCTTGATGACAGACTTGTGTGATGTTCTTCTCAGTCACACTACCCTTGATTTAAA  
CCATAGCAACCAATTTTCAACATCTGCGATGAAATCAGCATCTGAGATGCTCTTATTCATTTTCACTTTGTACAAGCAAGAGCTAGAGCAATC  
GGATCAAAATCTTTGGTATTTGAAGAGATCAAACTCCTCAGACTTGGAGAGCAAAATATCATGGTTACTGATGAGAGTGAGGACTCTTTCAACGTCA  
GCGCGGAAGCAGTCAATTTGAAATAGAAATGTTTTTTTATTTTGAATGTAAGTTTTTTTGGAGCAATTTTTGTTGATTTAAAGG

>c9415\_g1\_i1\_len=2203

TTAACACTCTCTTTCAATAAACAATACAAATGGCTGAACCAATGACGTGGAACATTTGTGCAACTCAGGGGTGTTGTACAGCCCGGAGTTCATCAA  
AACGTTTGGATCATCTGGACCGCATCGGGGAAGCGATACGTTCCAGCGTGAAGCTAGTTTGAACATGACATGGTGTGCTGCTATTGTGCAA  
TCTGGAAGTCGATGAAAGCCTCAGGCCTTCGATCTCGAAGAAGATTTGAACCCCCACCCTTGAAGAGGAGAAAGTGTGATGAAAGTGAAGCGAG  
TACCTCCAGTTCAAGCGCATCGGACAGAGGGGTGAGTCCCATGAGCTGCCAGAGACCCAGATGTGGTTGCAGAAGTAAAAGGTGATGAGGACGT  
GTATCGTTATCTGCTTCTGGAGGGAAGGTCTAATGTAGCTCAGCTCCAACATAAAATATGCACTGCTTTAGGCATAGAACCATGAGGCGTCA  
CGATATATATGATAAGGTGAAAGAAAATTCATTGAGGTTAAAGTCACTTAAACTACCAGGCTTCCCTAGATGAGTTTACTATTACATGGATCC  
AGATCAGTATATTTGCACTCCACTTCAATCCGCTGTCAGCAGATTGCAAGCAAAAGGAAACGCGATCCAATGTCTGCTGGGTTGGGAAAGGCAAA  
GCAGTTTCTGTTGGAAAGAGCATCGAAGATGGGTGCCAATTCATCAGATGGAGTCTGACCTCGTCACATCGAAAGACTTGGTTAAGTCGATCTT  
TGCTGTGAGAGATTCAACAAGTGGTGGCAGATTGGACAAAATGTTCTGGGATCACAAGGACAATGCAGCTGTGGGTTATGAGAGATAATGAA  
CGCAGAGAAAGTGGACTGGGTTCTAGAGAAGGATTTGAAAGCTTCAATAGAGGATACAAGCAAGAGGGACGCAAGATTCATGAAATTTCCCTGGAAA  
AGTCTCCAGATCCATTGGTTCCAGCTGATGATGACAGCTGTAAGGATTCAGAAATGATCAGCTTGTGTGTTGAGGATTTACCTGCTTCTGCTGC  
AACCGAGGAAAAGTCCCATGTGTTGAACCTGGATAGTGAACAAGTGGCAATCATCTGAAGGAAATACATTTTGCCTCTCCACAATCAAAGATAGGAC  
TGGGATGCTATAGAGCTGCAAGAGACTTAGGCATAGGGTGAAGGGGACCGTGGCGGATGATGGCAATGTAATCTAAACAGAGAGGAGTTTAA  
ACCTATCCAACAGCGCGTATTCCGCTTGGATGTCAAACCTGTTAAAGGAGTTGTCAGAACCAACAACCTGGGAATGAATTTCTTCTTAGAGTT  
GCAGGAAGCAAGAAATGCAAGATCCCAATGAACTGTAAGTGAACCCATGCAAGCAACAAGTATTTCAATCTGTTGGCCACTCAACTATTGG  
GTCGTAAGTGCAGCAAAATGAAAGAGCGTACTCCCGCTTTAGTGGGGCATATTCGGGAAAATTTACCTCCTCTAAAGACCGTCCAGACGCTGTGGT  
CTTCCCAATATACAGTGTAGGTGAGAAGGATGGGAAAATTTGGAGAGCGTATCTGGTTTTATCATTCGGGGTCCCAACAGCAAGAGTGGCCAC  
TGACAAGATCCCAATATCACAGTGGAAATGTTGAACGGAGATGATGGCGTGGGATAGGAAATTCATCAAGAATGCTCATGTGGTGGAGAGAC  
TGAGGAAAGCAAGTGGTGTACCGCTGAATTTCTGTGATGAAGGGGGCCCTTTTATATGATGACCTTGTAAATCAACTCATCTTACCTCCCGCGAA  
CATGTTAGGGGAGTTGACCTTGAACAATCCGCACAATAGAACGGACTACAATGCAGGCCTGGCGATGGAACCTACTTGTAGAGCATGGCGAATG  
GCTCATGGAGAGTGGCGTGAAAGTGTATGATGGCTGCGATAGGGGGCTCAAGAGGAGGGTGTATGGCTATCATCAGGAAGATCTTCATGAT  
GAACTTGAGTGGAGCAGAGGGCAAAAAGTATTGGATGTGATGTCAAAGGTTTAGCTGATGCTCTGAATGAATGTCTGATAAATTTCCCGTTTTCG  
TCTGTACATGGGTAAGCAGCTCAGAGACTCATTGGTTGGATAGTTCCGATCTCCTTGGGGTTGCCCTATTTTTGTTTAAAGAAAAGAGAG

>c16223\_g1\_i1\_len=254

GGGGAGTTTGGCAAGCAGATTGGGTAGCATCTGCTCGGGCCAGTGGTCAAACAGCATTAAAGCGAAGTTCGTGACCCCTGCATCTAAACTCAGCTC  
TATCGTAGAGATGGCGCGCAAGTTAGCCAGGCGCGGACTGCAACGCAACCTTCTTAGACAAGATCTGCCGAGTGCCTTCGAGAAGTGGGCTAC  
TTACGGGAAAAGAGGCTCGTTGCTGGCTACGTCATGGCAGGCGCATTGACGGGGGCTCG

>c26707\_g1\_i1\_len=500

GGGCGCTGGCGCAGCACAGGTCATAGGCGGCTGGGCGGACCTGCAGACGTCGAAGATTCGTGGCGGGAAGAACGTACCCTTGGTCCGAGGCTTAA  
ACGGCGGACAGGAGTGAAGCTTTTCGTTACGCCCTACGAACGCCACCGCGACAAAGTCAAGCAGATGGAACCGGCTGGGACAAAGTATGACGCTT  
GAGTAGTGGCTCAAGAAGAGTGGACGCAACGACTAGCTGAGCGAGTGGCACTGGACTGTGGAGTGGAGGCCAGTAGATTGTATCACTGGAAGA  
GAACTTACGCTGTATGGTGGGAGCAGTACCTGTTGACGGAGGATTACTACTCGCTCGCGCAGGTAAGTACTAGCTGTCTGTAACCGGGGGGAGCAGAC  
CGACGATGATGTGAGCCGACACTGGCCGTTTACGCTATGGCACTGGATAGCGGGGAGTGTGATTACTAAGACCGTGGTTATCACTCAACGCTC  
GGCAATATCAGATTATGCT

>c35080\_g1\_i1\_len=257

CTTGTGGAAGAAGAACCTCTTCCGCTTGTCTATCATTTAAATTCATTCCTCGTACACCCGAGTGGCTCGAACCCGACGACCATCTCGTCAAT  
GTCGTAGCCGCTGAATCGTTCCGCCAGACTAGTTTTTCCACCTAACATAGGGACAACCTACGGCGTGAAGTCCACCTCGCCTTAATCTGTCTCT  
CTCGTACCGCAGTAGAGTACGTTTTGCCTGACTCCGCTCAGTGTAGGACGAGCTAAAGTTGGAG

>c1129\_g1\_i1\_len=292

CTCCATGCTCTCGGTCGTAACAATATAGGGTATCTCATACCCCAAGATGTCTCGCAACCTTCCGTCAGAGGTAGGTTGGGCTGTGGTTAAAGTT  
GCTGCACCAAGCTAGGACGACAAAGTGGACATGTGGATAGAGAGGCGGCTCATTGCCCTCGATGATGTTGATTGCCATGGTGTAAATGGCATTTAG  
ATTTTGTCCCGGCTGGCTGTCAACAGCCGTCAGGAATGATGTCAACCACTGGACCTCCGTCGCGCCCATGAGTTTCCGCTTCCGCTTATGAT  
GTTG

>c2748\_g1\_i1\_len=373



AAGGAGATGTTTCGACGAATGGATGAGCATCAACGGCGGCAACTACCAGCTTGGTGTGACGGCCCAATGTATGCTTCTCTGAAAAACGGTACACAA  
TACCCATGTAAACGGACACCCCGGGCCATGTGGACCAAGTTATGACCAAGTACACAAACATGTCGTGCAGATCAAGCATGTCAAACGCCACCGA  
GGCAAATTCGTGATCAACTCGGCACGGCTAGCCGCAATAAACGGGACCTAGCTACTCAATGAGCTGTGGCCGTGAGCTGAGCGCCGAC  
ACAAAAACGAACGTATCCGCTGCCGACCTAGTTTGGCACTTGGAGCCGACCCGACGTTCCGCGAGAAGTACGATCGCTGGAAGCACCTCTCTCC  
ACCGGACTCTACAACATAACGATTTGTGCACTACTAGTGCATATGATCGGCAACGAGCAGGCTGACAAGATGTTCAACCTCTTAGAGAAGTACAGG  
TTCTGTTGCCCTCGACGTGGATGATTACGCAGCCTTGTTCAAACACATTAGCACTGCCATTCGACGGACGGGACGCTGGGAAGACGGCAGTCCAGCC  
AGCTTGAAGAGCGGACGAGTATCGGCAGCTAGCCGGTGGGAAGTGGCAATAAGTGGGACTGGCCGGAGGAGAAAGCGGAGCGGAC  
CAGATGGTAGTCCCTTGGGGGCCCAACTGCGCAGGACAAGAGTGCAGGACTAACGCCGAATATATAGTCGCCTTACGGAGGGAATTGAACCTG  
ATCAGGAAGCAGCTGGTGCAGCCCGGGTTCGTAAGAGAGCTGGGAGGACTTCGTCGAGAACCAGCAAGATGGGTAGCTTCTGGTAGCACGGGA  
GGGAGCGCCTAGTCATGCCCCGATGGGGAGCGGATACGCATGAACAAGCAGGCTATTTGCACTCAGTTTCGAAAGAAGAAATGGTATCATGGCTT  
GAGGATGAGCCCAAGATAATCGGCACGGCTAGCCGAGAAGTTGAGATGGGCAAAATCACAGCGATCTACGGCACCCGGTGTCCGTGATTACGCCATA  
GTCGCCATGTGATGGATGGCGTCGAGGAGCATCTGTATAACATCGATGGAGTGGAAAGTGGGCTGACGGGATTTGACGCTATCGCAACCATGGTG  
AGAGCTTTCGAGGTAGTGAGTGAACCAAGAGTCGAGTGTACGATGGTTGATTATGCTGACTTCACTACCAACACACTCTAGAAGCACAGGGAGCA  
GTTTTTGTAGAGTCTAGCCGACGCTTGGCACAGCAGCAACATCACCCAGCAAGGTACGGGCTTCGCGTTGGGTAGCTGCACCCCTATTGGAACAG  
TATTGCAAGTTCCTCCACGAATAAGGCAAAATGACTAAAGTGACACAAGGATCAGCTAGTTTCTGGCATACGAGCACCATTTCATCTGGCTTTTG  
AATCTAGGTTATTTTAAAGTAGCTGAGGCCCTGGCTCCAAAAAAGAGCTGCGTTTACAAGCCGTGGGTTTGCACAATATACACCAAGGTGATGACGTT  
TGGATATCCAACAGCTCCCGCTGTGGGCTATCGGTCTCTATAGGTTCTTGGAAAGCTCTGGGCTCGTATTCCAACCCGCAAAACAGCTGTTCGAT  
GTGAACCTTAGGCGAGTTTCTGCGCTAGTATACGCTCTCCGTTGCCTGTAGGGCTACCTAGCTCGTCAATAGGCACTTGTATTGAAACCTATC  
GTGAACAGGACGAGTGTGACGAGCCGCTAGCCCTCAATGCGACAGATAGATGCACTCAGTGTAAAGGGCTCAGGAGCTTACAGGAGCTGATCTGAAAGTGGCTGCA  
CGCTTGAACCTACCAACAGTACCGCGCACCCAGCTGAATATGAGACGATAAAGGAGGAGAGACGGCTAACCCCTTGGTTTGAAGTGGCTCAC  
AGGCTTAGCTCTGGTGACATGGAGAAGGTGACACCCGTTGTCAGTCAAGGATGGGCGTCTCATGGCCGAATCGGGCTTAGCCCTTCCGAGC  
CTGAGCAATFACAATGACGGCAACAGGGTTGGACGCGCTGTGAGCTGCAGAGGTAGCGATTACATCGTGCCGGAAGATTGAGCTGAGCGCGCGGGC  
GCTGCCCTTGGCCGATTGAGCAATAAGTGGTGAATGCGGGGCCCCGATTTGGTGTGACGCGGCTCAGAACTGGCTCCACTAAGTACGAAGGA  
GAATTCATTCCTCCAGGTTCTCTCTTGGGTTCAAGATCAGGCGTTAGACTGTGCTATTTGGTTCAGATGACCGCAAGGAAACGTTGGAGGGGACCGCGAT  
ATCAGAGAAGTGTGTGCAAGAGATGGACAATACTGTCAGGCTGTTGAGGAAGTTCGCGATTTTTCATATGATCAGCCACTATTAGAGTTGAGGG  
ACAGCTTGGGACGGCGTAAACCCACCGCGGTTACATATGCTGCGCCCTAGAGCAGGCTCGGGCTAGCAGTTATCTTAGGGCACCCGCTTGAAT  
TCGAATAAGGGTGTCTTAAACGGCGACGATACCCCAAGCTGTATATAGTCTTTTGTACATAAATCTTCCACTCTTCCCTCTCTTCAATTTTA  
ACTCTTTTCAATTTTTCAGGCGCCGAGGTTAGACTGCTGCTTCTTCAAGTACGCGCTGAGGCTGAGGCTGAGGCTTAAAGTGGGACTCGCCTGAA  
TTTTATAAGAGTACCGGCAGCCGGAAGAAATCGCGTTTTATTTCTGTACATACTTTTCTTTCACCCCTTTTCTTACTTGTCTCCCTCTGAATTC  
GCAAGTACCAAGACTCACCAACACTAATACACACGATACTTCTTCTATACACACGCAAGCAATACATACACTACACACACACTACACTAA  
CACACATTACACAACAAAAAACAACAAAAAACAATAAAAAATAAAAAATACAAAAATACAAAAAATAACAAAAAACAACAAAAATCAAAAA  
AAAAGGGGCTTTCGGGGCCCGCAAAAAAACAATTTTAAATGTTAAAGTATAGTACATACGCGACTAGGCGCCACAGGAAACGAACTTCAATAAC  
CGTGCAGAACCTTGTGACCCGCTAGTGGCACTACCCTGCCAAGAAGGCGTGTGGTAGGATGAGACCTAATGTAACCAATATGCAGAGTCTC  
GTCAGTGTGTGGTGAATACCGCAAGCGCCAGACACCGACCCCGGTGACTG

>c37343\_g1\_i1\_len=253

TTTACCAGCGCAGGCGCTGATCTAATTTGGCACGCGCTGTCCTTACGCAGCTCGAGCTAAGTTGGTACATGGAGCCCTAACCTCCCGGTAGC  
GTACCTTATGCTACCCCTTCTGGACCATGGACTGGACTTAGGACCGCCTATGACGGCTGCAAGCGCGCAGCACCAGTCACTCCCATTCGACGAT  
GGATCTGTGTAGCCGAGCCTTAGAGGAGTGGCTGCCAGCGTATGGCCACGACTACGTC

>c48383\_g1\_i1\_len=229

ACGACCCGAGAGCATGGAGTGGGCTATTACGACCTGGATCGCAGAGTGGGGCTGAATGGGCCCAACCCCAAGTTCAACTTGGCCACGAGACGAT  
GGTGACCGCAGCCGCGATCCCGGGCATGTACATCTACTTCCGGAAGCAAGAAGTACTACGACACGCGCAATCCAATTCCTCGTACCTTTACGT  
GTTGTACGCGGACTAGCAGCTAACCTAATAACACAG

>c8342\_g1\_i1\_len=1509

GGCGTGGGTTTCAGTACCCACATTAAGGCTTCGCCACCGATAGTTACGGACTACTCTTTCATATGCACAATAGCCGGTGCACCAGAACCTCAGGGAGA  
GGTAGAATGGGTGAGCAATCAGTAACTCTTATGCGGAGATTCCGTAACATGCGAGCTGTGTCTCGAGGGAGATTTATCGTAAACGCACGAACCTCT  
ACAAATGTTACGGCATACTCTGGGAGAACTGCCATTCCTCCCGGTTTCGCATAGAACAAACCTAAGGCCGACTGGCGAACATGTCCCAATCTCTCG  
TCTGGCCATCTCGATGGTACAGAGCCTCCATCCACCTTTCGAGGCTACGACAGGAAACACCTTCTATCCTAAATCCGAGAACTCCACCTCA  
TCGACGCGAGTTGTGTAATGGATTTATCAACGTTTACGGTCTAGCCAGCTTCGACAGTTGGCCACTTATCTCTCCAGCGAGAAGTGGCTGTG  
CTGACACTACCGAATTCGCAAAAGACAGGCAATCTTCTGGACTTCCGAAATCTCTGAGGAATCGATAGTCAAAAATCCAATTAACG  
ATGGAATCGACAAGCTGGGTGAAGTAGGATCCACTTGGAAACACAGCTTTCTTCTTCCACCTTTCGCGGTTACACAACCGGAGCGGAGTCTCCAGA  
AAATACTTACCAGGTAGTCCCATGCTCGGTACAGTCTACTTGGCTCTGGTATACCATGCTTTTGGTATCGTCGATGTCCACGTTCTGTTGAGT  
ATGGAATAATGCTATCTTTTCAACTGCGCGGATACCTGCTTATCGAAGCTGGAAAGTTCGATACATCCGAAATATCGATACCTTCTGATACGAGAG  
CGGAGTTTGTAGGCTCCACCAACCGCCATATCGTATCCGTAAGCTAGCGGCTCTTCCCTTTCTTGTACTCTGTCGATCAAAAGGAGTGCAAAAGCAT  
GCCTCCATCAATGTGATAGCAGTCGGATATCCATACACTGCTCGGATCTTCGGTTCATCTCTCTGGATATGTGCGCGATACAACACCTTGCATCA  
TCAGGTGTGAGGCTCTCTCTGCTTAAATGCGGTGCCAGTAGCGTCCGATCGATGTCCTAGCGTCTGGACAGTCCATAACTTCGCCGCGGCTTTG  
TACTGTGGCTGCCACGGGAGTCCGGGACTGGACTTGCGAATGCTCAAACTCATATCAAAGATATCGTTTCCGATGAGTGGGTTTACTGGAGTCACA  
CTGAACCTTATCCAGGCTGCAGTACTACATATCAAAATTCGTCATACGAATAAATTTCTGCGATTGGATCCACTTCAACATGTCATCTTGGATT  
AACTAAACCTCAATTCGATCTACGAGCAGTAGAGAACTTCTTCCAAACAGAGCTTGTGCATATGGGGAGGCTCGGGTACGTTTGGGCGCATT  
CCAAACCTCTAGAACGATTAACGTAATACATCTTCCCGTATTGAATAACACAGTAAAAATCGCGCGG

>c9239\_g1\_i1\_len=4038

CTTCGATAAAGTACACCAATGTTATGTGCAAGATATATCGTCCTAAGCTTTATGCGGTAAGATCCGATAGTAGAGCAACAGCAGCGTTAGCCACA  
TGATATACCTTTTTCAGTTCGCCAAGCAGTAACTGTTAAAAATTCGGAAGAGCACAGCTATAAAGAAAAACCTTTCATGCTTTTCGCATTAACTAGTTTC  
GAAGGGCCAGGAAATTAATAAATCAACCAAAAGTACGATTTCTTTTCAGCCGATTCACACTATCCTCAGCGTTCCCGTTCTTAGGAAATCAAGTAAC  
ATAACTGCGCCGAGAAATGAAACATTTGAAATCTCAATCCACTATAATTAATTCCTGAGTCATAAAAATCATTAACAGATGATTGAGTAATCATT  
CCAGTCATGGATATTAATCATCGGAAGGGCTCCCAATGAAATCATCTTGGATTTTTCACAGCTGCATGGAGAATCTGTGATTCAATATCTCTTCG  
CACACACTGTTCTCAAAGCCATACGCCATAGGATAACAGCTCCTTTATCGGCGTCAAGCATCGTATTCATCGTATTTAATCAAAAACACTTGTGTC  
ACTTCTGCTGGAGAACAATTTGATCTCTTAGCAGGATCTTTTGAATATGATACGTAATCTCTCAGTCTGAGTGAATCGGCTACTCATTTTCAATTA  
TTAATGCCAAACGCTTAATAAAGAGTTGTCTTGGCAGACATTCATCCATTAATAAATAAACGTTAAACGATATTGAGTGAATGGGATTTCCATATGTA  
TATACGAATCCCAATAACCACTCATCATGGTTAAATTTTCAGATCGGCCGAGTCTGTTTTAAGTCTTTATATATGAAGAAGCAACATTTCTCGG

CGCGAATGTCGAACAGAGGTCATGAACGATTCTAGAGCTAAACCGTCCTTAAACATTTTTCTCGGAACGTTTTCCGCATTATGGGTACCGAGAGTA  
AAGGCTCCTTTTAGAGCGTTTATCCTCTCATTAAACCTACCGCTATATAGAGTTTCCACAATCAAGATTAGGAGACTCGGATATTCGAATATCCATA  
TTCTCATCCGGATTGAATCCTCTATAAGCTTAAATCAGATAAGCATAGAGCACTAGAAAATTTATTCTCTCGATCTTCCCATCTTGCTCAGTTCA  
CGCAGGAATAACCGCTCAGTATGTACGACTGATAACGCTATCAAAGATAAACCGATCCCTCCGCAAGATCTAGGGAATAGGCATAGCATAGAAGAC  
CAAGTAAATTTCCGAGAAAGCATTATCTTTTTATCCTTCTTCTTGTGTCAGAAATCTCTTTCTTATTCTTAAGAATAACAACGTTTCTTATA  
GCGATCTCAAAACCTTGCCTTTCCCAGATAATATCCTTTCCGGAGCACCATTTCAGATTCAAGAAGCGTGAATCGAGTCTGCTTATCCACCTT  
GATATATATAAAAGAAATCGCGATGGCGGAGATTCCCTCATATCCTCGAGAGACTTTGTGCAAAAGTAGTCTCCTCAAACCTTCCATAAATGAACA  
GAATCAGTAATAGATCTAGGGCGTTCACAGCAGTACAGCATAATGTGATCTTTCGGAATATAAAACCCCAAGCGTAGCGTGAGTTTGAATATATTC  
CTCGAATGTATCGTGATATGCGTCTTAGGACAGACATCTCCAGACCGCAATTTCTTACAATTGAACCTTCCATGAGAAAATCGTCAATGTCC  
TCGGAAGTAAAGTCATCGGAGACGATCTTCATGGCGATCGTAACGTCATCGCAATCGCACGTTTGTAGTAATAGGTTTGGAGACATTCACGAAATTT  
AGATCTTTTCATGCGTCCGCGCAATATTATATCAATCATGGCTAATGTAGCGGAGAATTAAGCTAACGTCGTTAGTTCACCTGATGCTTCA  
CTAGTCAAAAATATCAAGTCTCCCATCCATCCTGAAACTTACCTTAAATTTGGACTCGTCTTTAGGATGTATTGGATCAGAGTTCATATAGTAT  
GTACCCGCTTTCAGAGATTTTAGGCGGGTATTCGTTTCAGCTTATATTCATGTGCGAAATCACGATTTCTCAAACCTTATATCGAGATGATAAT  
TCTTTCAGATCCGAGTCTTATCTAGATACAGATTTGAACTCTACCCGCATCCCAATATGTACCATAAACAGATCCCTCTCCAAAAGCATAATCA  
ATCATTTTCATCTTTTATCAATCTTGTGTCAGGACCAAAACCGCCCTTCCGAGCTTTCAGGCTTTCAGGACAGGAGTATGGCTTCCGAAAATTTCCC  
CAGACTAAGCTCGAGTCAAAAAGGTTAGCGTATCGATCGTTATGACCTTATCCGTACCAGAATTCATATTTGATAACCAGTATCCACTACC  
CGCACTCCACTTGTGATGACGATCCAGCACTGATATGATCACAATGGGGGCCATCAGTTGCAAGCGGAGAACGGTTATCGGTGCTGATACATAA  
ACAGCGAGGTGATGTGCGACCGCTACTTGTAGCATGAAGCGTAGGACGGGAATAACGTACACAGCTCTCGTAGCTTTATATGGTACATCCCGAGCT  
CCAAGCTTCCAGGATTTTTCACGAGTTAGTTTTCTCGACAAGTGTCTCGGGTAAATAAACTTTTACCACAACGACTCCCATCCCAAGTTTCTTT  
CCAAACCCGTACATCTTGTATTTCCCTATCATTAACAGATACGCTTACCTTGTGTTGACCCAGCAGAGGTGCTTTTCCAGTAACTTATACAA  
CGAGGATAGAATGTTTCAGTCTGCTTGGCATAATTCCTTCTCAATTGCCATTTATGGAATGACATCAGTATCTCTCAATTTTATATGGTAAA  
TCTCCATAATCGCTTTTCGCTCGAAACTTCTAGTGTGCGCTATTGAGAGCTGAGCTCTACCGTAACCGAGCATTTCAGGATTTAGAAATGAAC  
GATCCCAAAAAGGAAAATCGTCCACACTTGTATTCGATCATCAAAAATTCAGTGAAGATAGTCAATTCGCAAGATCATGTAGTTTGTATAAC  
TTATGATCTCTTCACTGTTTTCAATCCATCTTCAATCGATCTTTTAGCAAACTCGAATCCGAGAATTTCTTATAGAATCATGATCAATTTTCTGG  
ATGACGAGATCAGAAACCAATCTGGATTCGAGTGGATTTCCGCTCATATGACGAACGTAATGCGGATTATCACTTAGCGAACCGGCTCGTCGCACA  
ACCATTTGTGACCGGGTCTTAATATTTTTAACGACGATTTTGGTGAGACCCCTATTTCTCAAGGCCACTTCGTCAAGTATAGAATACAACGAAATGA  
TATTTGCGGTTAACCCGAATATTGTTTCCGGACAGGCTCATCTAATCTCAGATATTAAGCATAATTCGATAATGTTATTCATGTTGTAGAAA  
CCTGACACGTAATTCAGTTCAGAAAATCTTTTTCCGAATGACTACAGCGGAACGCTTCCCTGCTTTTTCAACCATGAACAAATCCAGAAAATA  
TATCGTAATTCATCGGATAACCGCCAGTTCTCCCTTCGACAAAAGAGAAGAAGAGGAACACATATATCCCGGCATCGTCCATATGTCAGC  
GTTTCAGTTTTTCGACGTTCAAGTACAGAGATATGAAAAGGAGATTCCTTATTTATTTCTCCACGTATCTAAAAATGTCGAGCGAACATCAATCGGA  
GTGTTCTTGCTCCGCTCGTCCGATTCGATCAACGTAATAATCCGCGAGTATCTTAAGTGATTCACATATCTAAGCCATATGTTCTCATCTCT  
GCAACCTGACTTTTCAGTAAAGTTGTTGATCCCAAAACCTTACCTCAAATGTTGCAAGTATGTCGAGCAGGATTCATGTTCTATCCGAAAATTTTCG  
AGGGCGTCAAAATGAAGAGAAGGTGCTGTTCTCCATCTTCCCAAATTTTAAATTTCCGAAAAGACGGCTGCTCTGGGACCCAGATAATCATGC  
ATGATG

>c5575\_g1\_i1\_len=446  
GTGGCGGAATGTCAACGATAGACGATCCGAAAACCGGCTTGTGTGGATTTACCCCGCAGAGATGTTGGTGTGGAGGGCTTCTACGCTCCTCTTA  
TGATATCGTACTTTATGAACGATCCCAATTCACCAATGTTGAACGGGAAGAGCGCGCAGCGTGTGTACACCGAATGGTGTGCGGCTTGGAGGAA  
GGGAGACATATATGGCATTGATTTTCAGTGGTTTCGACACGAAGATAACCTGCTTGGTGTGATTCGAGTAGCTTTTGACATTTTGAACAGAACGTA  
ATTTTCGAGCGTATTCAGTTCAGAAAATCTTTTTCCGAATGACTACAGCGGAACGCTTCCCTGCTTTTTCAACCATGAACAAATCCAGAAAATA  
CATTTCTTATCGCGACGGACGATGTTCCGAAAACCTCCGGGTGTGCCTTCCGGATCTCG

>c5783\_g1\_i1\_len=733  
CTTTGCACTGTACTCGCCTCAATTTGTTTGGCGGACCAAAACAAGTGTGTTACCGGTTGCCTCGTAATCTGTGAAGAGAAAACGAGTTCCTAAAGC  
AGGCACGGAAAACCTACCGATCTGCGCTAAAACGACAGATTTAGGCGGGACCTTGACATCCGTAGAGGCCACAGGTGCAAAATCGCCTTGGAG  
CAGGCCATAATGACATGGCTGTGAACCACTTGTGCGGCTGCCCGCAGCAAGCAGCGGCTCCGAGCTCCTTAGCGAACTGGGCGTATCAATCTC  
AGCATGGGCTTTGAACTCAGCATATTTGGCGTTCATGGTAAGCCGGGAAGGAACTGGGCTAACGAATTCGCGAATACACGCGGTTCCAGCATGAA  
CGTCTGATCTCTCGACGGCTCCTCGGCACCCGTCGTAAACACGCTGGGAATTTACCCGGTTGAGGCTTCGCGGACCCGCTGAAACCAATCCAGAAA  
GGCGGCTTTTGCAGCTGAAGCGGACTGTCCAGTTGTGCACCAACGGCAGAACCGCGGCGAGCTCGCTCACGTTCTCCAGGCTTGGACTTCTTGGC  
AGTAGCGGAAGCGGAGTCCCTGGGGCGACGGTTGAGGTAATTTGCGAGGGCGTTCAGGATGCTCGCAAGGTGAAGGAGGCGTAACGAAATAGT  
CCTAGGTCACAAGTCTAGGCTAAAACATGAAAACCTCCCGTATACACAGGGCCAAAAGAGG

>c6217\_g1\_i1\_len=886  
CGGAACGTTAGTCCACCGTTTTGTTAAAACAATAGACACCTGTAACACAGGATTCACAGCGTTGGGACACTGTTAAAACACACGAAGAAAGGACA  
TGAACATGTTTTTCAAGATTTTCTCTTTTCGACAACGACAAAAGGAAACAATCGAGCACACCGGATGAACTACCGCCAGTCCATCTGAACGAACTC  
AGTGGCGCTTGGGACACCGAAAGTGGTGTGGTAACTACCACGCGCCGCTGTAGATCGCCCGTAAAACACACAGCAGTACGGGAAAGCACCGCAAG  
TGAAAAGCTCGGGGCGTCGAGAGCGAGATGAGTCTTACGACAGTAACACTGTCTGTCTCAGTCACAATGGCCATCTGGGCTTGGGAGCCCGTTCG  
AGCCATGCGATTTGCTGACTAGAAGACAACCTCGAAAACCTGAGCGTAAGTAGCGGACTTACGTGCCAGTTGTACGCCATGCGTGTGAACGACTG  
CTTACGTTAAAGGACCAATCTAAATGGCCCGCGCTTGGGTTTGGCACTCAATACCCAGCTCTCTGAGCACAGCGGCGCCGCGCGCTAGTAA  
CGCAACCGTGAATGACAGGGCAGTACGCTACGATTTAAACAGGAAATCAAACCTGTCACGTTGCCCGCATCATATCACCAGCGCTGCTTTATGTT  
CTCCACGCACTAGGAGTCTCTCTGATAACACGCCCCCTCCAGGGACGAGGCGAGAATTTGAAGATCCAGAGGTTGTAAAAACATGGACAGGCG  
ATGTGCGATATACGTTTTGCTCCGACCATCGTTTGCACGGGTCCGCAACACGCTCGCATCAGTACGTTCTTGTACTGTTACTCGCTCGATCTG  
TTTGGCGGACCAACAAGTTG

>c9031\_g1\_i1\_len=699  
CTATCGTTGACATTCGCCACGCTGGCCCGACAAGCAGGGGAAACCGCATCTTGGTAGGATCGAACGACGATTTGCCGTCTGTTCATCTGT  
GCCCTAACACCGAGTGCATGATAAATCTCTCCATTACATCACTTCTTGCATCCCATGAAGGATGCTCCGGCAGACGATACCGGCGCAAGA  
ACTGGCCTTGGGACACCGAAAGTGGTGTGGTAACTACCACGCGCCGCTGTAGATCGCCCGTAAAACACACAGCAGTACGGGAAAGCACCGCAAG  
GCGAGATGGAGAGGTCATCAAACCGTCTTCTCGCCTGAGAATTTCAACAAGGACTTGTACATTCAGGTTGCCCTTGGAGACGGCGAGTGAACC  
CACGGACTTCTTCTGATCTCACGAGAAATAAGTTTTAAACTCTCACGACCCAGGATCTGTGTTGAAATGGATGAGTACGTTGAGTAACCGC  
CATACCGAGCTATCTGTTCAAGGTAGGCGAGGAAAAGTTTTGGTGAAGCAGCTTTCGCTAGTGGTTGACCCCGTTTTTCCAGGACGGAGGTGGA  
GTGCGTCAACTAAATGATACCCCTTAGCTAGGACGTAGTGTGAAGTTGGATCCTGAGAATAATCTTCCATTACGCTCAGGGAGTGAAGGAGCGGAA  
AACTCCTCGTGAACACGAGGCCAAAAC

>c25256\_g1\_i1\_len=1070  
AATAAACCTAAAGATAATGGAGGAGTAATGCTTGGTGGGATATCTCGTGGTACTTGGCGTAGAATTTGAAAACTTTTCGAAGGTGATTATGAA  
TATTATTGCCCTTACTTTTTCCGGCTTCGATTCGTATTCGCATCATGGATTATCCAAAAGCATTAAAGTATATTCGTTCCACTTTAGGGAAGTT

CCTGGTAGTGATGCATATTGGCAACATGAGTATGATCGCCTAGTTAATACATTAATTGCTGACCCCTAGCGGTCATTTGTATAGGAAGAAGGCAGGT  
ATTGGTTCGGGAGATCCTTGGACGTCAATTGTTGGCTCATACTGTAACCTGGATGATACTAGAAGCAATTCTTTTGTTCATTCACATAGAAAACGGA  
AAGCTGTTTACTTTGGAGATGATAGCGTTATCTGTCTACCCAAGTACCGTAAATGCCAACCATTAATGAATTCAGTGAACGTGCAAGAGTCTA  
TTTGAATGGATATCCATCCAGGAAAAAGTTTCAAAACGTATCAATTATACCTTAAATCATCAATCCCGGTAGAGTCTCAAACAGCCGTCAACTTC  
TTATCATACTATTGTAATGATAATCGTCTCCCGGTGAGAAGTACCATGATGTACACGAATTATGATGCATCCTGAGTGGAAATGAGTCAGACGAT  
CCAAAAATAGAGCTTGGCTCGCACATGGTCAATATATATGTCACATATTTGGAATGACAAGAGTGAAGAACTTATTAAGATTGTTCTACTTCTATCTT  
AGACACAAGTTACAAGACAGGAAGTACATTTCTGTGATGACATACCGCTGTTAATGAAACACGGAATGCCTTACGATTTAATCATGAAGACTGTA  
TCTGACGACCTACCTGATGCTATGGAGATCATACGCTGTATTTCGATATCTTGTGCATGACCCACTTTATGCGGAATGGCCAGATTGGGGTGGTGGC  
AATTGGTTTGAATAGTAGCGGTGAGAATCCAATTGCCACCACAGCCATTTACTCAATTTAGTCATTAGCGACACCATATGTACATAAAAGGGAGAT  
ATGGTGATAAAGG

>c51155\_g1\_i1\_len=357

CTATTATTGATGGATGGTTGAATCATGATAATCTGTCAAGAGTAAGTGTACCATCGAAGACCAGTCCGGGTCTTCGCTATCGTCGAGCTGGGTTTC  
GCACAAAGAAAGATGCCTTGCCTTCAATGCGATCAAGGATGCTTATTTGGATCTTAGCCGAATGATAAGTTATGGAGAACAGCCGATGAAAATTCAT  
GCTCAATGGCTGGTAAAGTTAGTTGGTGGTGGGAAATTAACCCCTCCCGCGGAAGATTGATTATTTGTCCTGATCTTGTCTAGAC  
ATTTGATAGGATGTATTGCTAGTCAACCATTTGCAAAAGATCACACCGGAATAAACCTAAAGATAATGGAG

>c37453\_g1\_i1\_len=594

GTCGATTTTCGTATGAGCATGCGACCTGTGTAATTAGACAAATCACTCCACTTGACACAAGTTGCCGCCACTGCGTGACAGAGGAGACCCTGAT  
GCGCGCTGAGATAGCTTCCGGACTGTGCATGACCTTAGCTACAGGGTCTGTAGTTCGGATCGTCAAGGCAGCCGTCGCGTTCCTAGGCAACAAATT  
GTTTTCGATGAGTTCGTTTTGGTTCAGCGATGCTGCCCGAGTCAGAACCTTCGATATTAGACTCTGATGGGAGTCCGTCAGTCTGCAACTCCGAGCC  
CTCCGGCTCGGCGGTGTTACTGTCAAGTGGAAAGTGCAGACATTATAGAATTTACGTGCAATGTTTTTGTATGTTGTTCTGTCTTACTAATTTTTTGT  
TTTTATTTGTTTTAAATTTTTGTTTTCGAATGTGAGAAGAGTATACTAACTAAAAGGCTAGCTATAGAATATGCGTATTGCTCGTCTCAGCTAAGC  
AGACTGGTTCAGTCCGGGACCACCCCGTATATGTTACAGGCAGTCTTACACTACTATGAAATCGGGGCGGCTACTATTAAGAGTGGTAATGCA  
AGGCCACAGGCTGTCTGG

>c42393\_g1\_i1\_len=205

CGGGGTTCCCACTGTAGACGCGATGGGCAGTTGCAAAAGCACAGTAAAGAGCGTCTGTGACCTGCTCGTCCAAACCCGAACTTCATAGCATACATCTC  
AATGAAGCTTAGGATGAGATTGGGATTGGTCCACCAGCTAGGGGACAGTGGACGGAAAGACCAAAGTGTGTTCCGAGATAACGCACATCCTGGTACG  
CACTTTCGCGCTG

>c43689\_g1\_i1\_len=402

CGACACGACACTCATCAATACACTACTCAACATCGCATACGCCACCGTGGTTCGATGAGTCTTTGCGGGCTAAGTACACCAACCCGGGTGTTGTTGA  
GAGTGTGTGTCACGGCGATGACATCATCAGAGTGCATACATCGCTCTCGAGAGCGGTGCTTTGGAACGATGAAGCCGCGAGCTTGTACCTAGAGGG  
ACAGGAGAGTAAGTTGATGATAGACCACAACATCATGAGTACTTGCCTATTATGGGGTGTTCGGACAACAAGCTCCGCGGGTCAATGGCCAGGTG  
GCTGGTCACTTCTGTAACGGGAATTTGGAGACAGACAAGATAAATCGGAGTGTGGGCTAAGCTGCAGGAAAGTGTAACTCGCTTGCACATGGGT  
GAGACGGGGAGCGGCCAG

>c51753\_g1\_i1\_len=404

GGCTCTTTGACTTTATGCCAAACTGCCGCTGTGCTCCGACGACGCTCCACTCCGTAGTTTGGCGTGAGGCGGGTGGGCGGCAAGCCGTCCTTAG  
CCATGCAGGTTGAACGGATCCTATATGTGGCAATCGACGATGCTTCCGCTACTATGTACGACCGTTACTTTACCGACAAGGCGTTTATAGAGGTGG  
CGTGGCCAGAAGTGTGCAAGCCTGGTCTCCCTATAGATCCAGTGAATTAAGGGGCGTCCATCCCTCAAACACTACAATGCTTCGGTTCAGCCCTC  
AGATACTCAACAAGATAACCCAGACCCCTTGACCCGACGACTGCTAAGTTCTGGCAAACAGCTTCCAACCTGAGGAACGAGGCGGATGCATTTGGA  
TCTTGGCGGTATAGAGCTAAG

>c2871\_g1\_i1\_len=2961

GTTAATCTTAAAAAATGGAAGATTATGCGGTTTAAATAGTGAGATAATGCTGTCATTCAGTAATATCTTAGTGGCTTCAAACATATTAACAGC  
TTCGATTCATTTCTACTTGAATAAGCTCAGCTGAGGACAGAAATCGAGTCACTCTGAGGACACAACCGCTGGTTTCTTCCAGTCAAATCTTCTTTCC  
CTCTGGCAAACCAACAACGGCCTGAACATTGACACCCGACCTCTTCGCAATCCCGATCATCTTATGAACAAATTTTCATATGTTGGACTGGAGTAG  
ATTTGGACAAGAGCCAGACTTTGACGCGGGGACGACTTCAGAGACTCTTCGTGACAGTGTCTAATGCCAACCCCAACCCACCTTTCAGACTTTTGTA  
CCAGTAGAATGTCATGCTTCCCGAGTTTCGTAGGAGGAGGGTTCATATGTCGATCATCAGCTATTCCAAATGCGATCACCCATTGATGGCCACCT  
AATGATGATACAGTATCCAAAGGTGCTGTCCATATGTTGACAGCCCTTTAGAGTATGGAAATGCTTACTTTCATGCTAGTGTGTTGGCCCATGT  
AATCAAATCTTTGGGATACGAATAGTTTCTCCTTGTAGATAAAAGGGTGAATGAGTTCGAAGCTCCTCGGCAGTGGTAACCTCCAAATTTGGATC  
TAGTATGTTGTATAAAGCTGAACATGTTAACCATTCTCTAGGGTCTGGAATAGACCAATTGGTTTTAGTGGAGTCCAGCTTGGTTAGGTC  
ATGAATGTAGCCCTCAACCCGATCCGCTTCGATCACAATGAAGTAGCCTTTCTTAAATTCAGTTCAGTAAGTAACTTCGTGTTGGACTTATT  
GGAAAATCCACATCTCAGACTTTTACAGAGCTATAAATGAGGAGTATGAGTAAAGAAATTTGGATTCAGAATTTGAGGACGAGGCTAAGCTTAA  
TATAACCGTATTTGCACTCAATTCATGTCCGAGGTGAGCAACCTTGAAGCCAGTCTTAGAGGCTGACCCGCGCTCAATCCACACATTCGGCATC  
GCACACTACAAGGTCAATAGATGCAGAGAATTTTACCTTAAACATGCTTGGGTACATTTGGCGAAGTGTGATGTCAGTATATTCATTTGTGAGATC  
AAGATGTTTCAACCCGACCTCCAAATGCGGAAATCCAGCTAGGACGGGACAGATAGGAAATAGGAGCAGTCTGCTGGATCTGATCCTGGATTGGAT  
CAGGGTGTGAAGAACACATCTGATTTCTGGAAGGTTAGCAAGGCACTTAAAGTAAACCCCGCAGCTCCATCCCGCGAGCATAGGATTTTTGAAG  
CATTAGAGGTTGAACATGTTTTCATCAAGGCGAGACCTTTATAAGGGCCAGTGGTAGGCATACTGACCGTTTTTATTTGATGTCCTGAGTAATCTCG  
CTCGGAGGAGCCTAAGCAACTAGGAATCATAATTTGTTGGAAAATAAGAGACCTTCTAGTGAAGTTGCTACAATTTCCGATACTGCGGGGAGATC  
AACAAAGAGGAGAGGATCAGGATCTCAAGGGTAAGAATCGGGACCTCTTTCGAGAGAATGTCAATTTTCGTCGGCCACCACAAGATTTCCCTCCATC  
CTTAAGTAATCTCTCCGCCACCATGGATTGATAAACCAGCAGCACAAGAATAAACCCTATTAATAGTTGCTACAATTCGCTGACGAGATTGCTAC  
GGGGTATCCTTCCGGCTTCTCCACCCAGCTCTGCATCAAAGGAGAATTTGACGGGTGAAGCATCGCGCCGAGTCTGGCCCTGATCTCACTTC  
AATGTGATTGATAGGATGTTCTCAAGATCTTGTGAGCAGTGGAGAAGAATATGTTCCACACACTTCTTGATATTCAGAGACAGGGTGTGCTC  
AGACATCTCCGGATCTCTGCCAAATACGGACTTGTAGGGAAGTACACCAATTCATGATGCAGATTAGGGGTGTGTACCAATTTACCCAGACCTTT  
CCAAATGCTGATACACTAGTTCGGGTACACGTTCCGACTCGATACACAATTTTGGAGGGGAACATTCAAAAGCTTTGGGAGGAGTAGTATGCAAG  
AAACAATAGGGCAACGAATTCAAAGTTTTTACAGAGGGAGCCGAAGGGCCCAATTTGATCATAATTTCTGGTTTTGAAAAGTGGTAATCTTATG  
TCCCGAGGAAGAACTCCAAAATATCAAAAATTCGAAAAGCCATCAAGGCTATGAGCCTATGTTGGAGTTCTTCCGGAGCTGAAGATCTGAGCGC  
CGTGGGTTTTAAAAAAGGTAATGTTGGAAGTAACTGGAATTTGCTTTCGCCTTGGGCACAACAAAAAAGGATTTGTTCCGGCGAGACAAAATCGAAC  
TGGGAGATCTTCACTTCCATTTTGTCTACTACTGACTTGTATACAGCAAGAAATTTTTATATGCAAGGTGGTGGAGATGCAATATGGCTGTAGG  
AGGGGCATATCTCATTGCACTCCCTAGAATGCTTACTCCATATGAGATGGGGGACTGAAACATGAGAGTTACGTTTTTGGAGCCTTTGCTATAAGC  
TACCAATGGGAATGTGTCATCTCATTTTTGTTCGCTAGTTTGGGAGAGTGTGACTGCTCCACCTCGGTCCACGTAGTCACTTTCCAATCGGTG  
GTGAACGGATCCAGAGGCTGAGACTCGAGAGGAATGATACCTCTAACCGAAGCTGTGTAAGAGATTGCAAAAAGATCCATGATAACACGGTGCAT  
ATTTCCCGGTAGTGGAGTGCAGCCATCCAATTAAGGCTCCCAACTTGTCTGCTTGTCTAGCAGGGGAGCAGAATAAGCAGCTACACAAATGGCCAGA  
AGTAATCACTTCTGCTTTGTGGAAGAACCCTATAGGGCATATAGGGTCCGGAACACAGGGGATCCCTGAGAGACTCTTG

>c2871\_g1\_i2\_len=2057

GATTCAGAAATTTGAGGAGACGATTTCAGAATTGAGGAGACAGGGCGTAAAGTCTTAAATATAACCGTATTTGCACTCAATTCATGTCCGAGGTGAGCA  
ACCTTGGAAAGCCAGTCTTAGAGGGTACCACCGCTCTAAATCCACACATTCGGCATCGCACACTACAAGGTCAATAGATGCAGAGAATTTTACCTTA  
AACATGCTTTGGGTACATTTGGCGAAGTGATGTCAGTGATATATCATTTTGTGAGATCAAGATGTTTCAACCCGACCTCCAAATGCGGAAATCCAGCT  
AGGCAGGGCAGATAGGGAATAGGAGCAGTCTGCTGGATCTGATCACTGGATTTGGATCAGGGTGTGAAAGAACACATCTGATTTGGAAGGTTAGC  
AAGGCACTTAAGTTAAACCCGCGCAGCTCCATCCCCGACGATAGGATTTTGAAGGCATTAGAGGTTGAACATGTTTCATCAAGGCAGACCTTTA  
TAAGGGCCAGTGGTAGGCATACTGACCGTTTTTATTTGATGTCTGAGTAATCTCGCTCGGAGGAGCCTAAGCAACTAGGAATCATAATTTGTTGG  
AAAATAAGAGACCTTCTAGTGCAAGTTGCTACAATTTCCGATACTGGCGGGAGATCAACAAGAGGAGAGGAGTCCAGGGATCTCAAGGGTAAGAATC  
GGGACCTCTTTGCAGAGAATGTCAATTTCCGTCGGCACCACAAGATTTCCCTCCATCCTTAAGTAATCTCTCCGCCACCATGGATTGATAACCTGAC  
GGACGACCAGAATAACCCCTATTAATAGTTGCTACAATTTCCGTGACGGATTTGCTAGCGGGTCCATCCTTCCGGCTTCCCTCCACCCAGCTCTGCATC  
AAAAGGAGAATTGACGGGTGAAGCATCGCCGCCAGTCTGGCCCTGATCTCACTTCAATGTGATTGATAGGATGGTTCTCAAGATTTCTGTTGGAC  
CAGTGGAGAAGAATATGTTCCACACACTTCTTGATATTCAGAGACAGGGTGTGCTCAGACATCTCCGGATCTCCTGCCAATACGGACTTGTAGGGA  
AGTGACACCAATTCATGATGCAGATTTAGGGTGTGTACAAATTTCCAGACCTTTCCAATGCTCGATACTAGATCGGGTCCACAGTTTCGAGTACT  
CGAGATAACAAATTTTGGAGGGGAACATTCAAAAGCTTTGGCAGGATTTGCAAGAACAAATAGGGCAACGAATTTCCAAAGTTTGTAGCAGGG  
AGCCGAAGGGCCCAATTGATCATAATTTCCGTTTTGAAAAGTTGGTAATCTTATGTCCCCAGGAAGGAACCTCCAAAATATCAAAAATTCGAAAA  
GCCATCAAGGCTATGAGCCTATGTTGGAGTCTTCCGGAGCTGAAGATCTGAGCGCCGTGGGTTTTAAAAAGGTAATGTTGGAAGTAACTGGAATT  
GCTTTCCGCTTTGGGCACAAACAAAAAGGATTTGTTCCGGCGAGACAAATCGAATCGGGAGATCTTCCACCTTCCATTTTTGTCTCATCTACTGAC  
TTGATACAGCAAGAATTTTTATATGCAGGTGGTGAAGATGCAATATGGCTGATAGGAGGGCATATCTCATTTGCCATCCCTAGAATTTCTCCCA  
TATGAGATGGGGACTGAAACATGAGAGTTACGTTTTTGGAGCCTTTGCTATAAGTACCAATGGGAATGTTGTCATCTCCTATTTTTGTTCCGTAG  
TTTGGGAGAGTGTGACTGCTCCACCTCGGTCCAGTAGTCACTTTCCAATCGGTGGTGAACGGATCCAGAGGTCTGAGACTCGAGAGGAATGAGA  
TCCTCTAACGGAACGTTCTGTAAGAGATTGCAAAAAGATCCATGATAACACGGTGCATATTTCCCCCGTAGTGAGTCCGCCATCCAATTAAGGCTCCC  
AACCTTGTCTGCTTTGCTTAGCAGGGGAGCAGAATAAGCAGCTACACAATGGCCAGAAGTAATCACTTTCTGCTTTGTGGAAGAACCTCTATAGGGC  
ATATAGGGTCCGGAACAGGGGATCCCTGAGAGACTCTTG

>c32974\_g1\_i1\_len=2318

GATTGGCCGAGCCAAATGGCCAGACCTACAAGAAGCTGTGTCCGAAGATCTGATCAAAAAAGCTACCAGTGTGATGTTGTAGATCTACACTTCCA  
ACGAGAAGCAATAATGATTTCCCTTCTCTCATGACGCCAATATGGTTCATTCAATGTTACGGTCTTTTACCGAATTTGGGGTCCACCCGACACTAGAACC  
TCTGAGAGGGGCAACTGCTTTGAAGGCAATCACTACCAATGTAAGACTTCTCAGATATCTCGAAGCAGAGGCCATATCAAAATAAGTCAAGGAAGA  
ATTTGTGGTTAGGTACTTTTTCGAAGAAAAGGACCTGGCCCTGGTCTTGACTTGTCAAACCTCAGCCCTCATAATGTCAATTCGTGTAGCATATGAAAA  
TCTAGCTCTCCCTTACACCATCCAGATTATCGTCCGAATCACTGGACTCTCATATCCTTCTTGCCCTGTTTTCCCAATTTGATCCAAAGTTTGA  
TACTCGAGATGCTTCCGCAAGGCCTTGTCCCTTAAACACACCGGACTTGAAGGAGAGCTAAAATCTGGAAAAGGTTCCCGATCATCAATCTC  
TAGGTCTGTTATCGTACAGTGGCTCCAAACTCACCTGGGAGATCCAGAGAAGTCTTGGAACTGTGGATGTAATAGGGTTACCTCTATGGAACG  
ATCTTTTGGGCTCAGAGAGAAGGAAGAGAGGGGAAAATAGACCGCAGAAATGTTTGGTCTAGTACCTTGGTAAAACGTATGTATATAGTACTCAC  
TGAAGCCTTATTGGCCGAGCACAATTTCTCTTATTTCCCTGAGATCACTATGACAGATGACGAAATGGTACTCGACAAAAGAGAATCTCTTTCAA  
TAAAACCTTAAGAAATTTTTCATTTGTTCCACCGACTGACTTCTCAAAGTACTCAAATATGCGAGAAGAAAGACAAATTTGGTCTTTTAA  
ATCCTTTGATGAGCTATTTGGTTTTAAAAACATTTTCCAGAGATCTCATGAATGTTCAATCCCGGTTTCAATGACCTGTTAAACGGCTCTTACAC  
TCCCATGCTTGAATGATGAGTTTGTTCATGATGGAGCTGGTTCGGCCATCTCGGAGGCATAGAAGGACTCAGACAAAAGGTTGGACAAT  
ATGGACAGTTGATGATCTGCTTTGTGCGGAGAATTTCTCTATAACTCTTCGCATGATGGGACAAGGGGATAACCAATTTTAAAGCAATATTT  
TCCAAAAATATGGATGAATCGACTTGTCTGACTATCCAGTACTTCAAGAGTGAATGACATGCTATCAAGATTTGGACCCCAATTGAA  
ATTAGAGGAGACCTGGACTTCCAAAGATCTTTCATATATGAAAAATATGTTGTTTATAAAGGCACTGCAATAGAGACATCTTACAAGAGAATCTT  
GCGGATGTTTAAAATGTCACACGAGGATTTTCCAACTGTAGAATCCGCGATATCAATGACAGCGAATGTATCTTCCGCTCTCTCGTGTAGTAC  
ATCCATCAATTTCTGAGTACTACATTTACACTTTCAGAAATAGTAGGACTTTTCCAACTGTTCCCTCCCAAGCCCTTTCTCCAGAAAAGAGCTCCGAT  
TAGAGACTGACAAAACCTGGAAGAATAGTGAATTTCCCAACTCCCAATATCCCGACCGTGGTGAATAAAAAGAAAGACAACTCAAGTCAAGG  
ATTGTTTCAAGCTTTTGTCTCTCCCTAGAAATCTGGGGGATTTCTGTGTCTTATTTACCCTCCCTTTTAAATTCGTTGGATTTCTGATGACTT  
AGAATAAACATATCTCTTCTGAGAATGCTTACTTTCTGGTGGCCCGTCAATACAACCGTTTCAACGAAATATCTCAGTCCGTTATTTCTCTCC  
CCACATCTCTTTGAGCTTCTCTTGAATCCAACTCTTGAATTTGATGTTCCCTCCGCCCTGGAGAAGCCAGACGAAGTTCCATCATATAA  
ATCTCTCAGACTGGTACGAAATGAGAAATCTAGTTTTCAGAGATTTCTAGACTACTAGGAGATGAAGAAGATAGAGACTTAATAGAAATCTCT  
GAAGACGTGAAGCTTATGAATCCAATAGTCTTATCAGCTATCTATGACGCTACTGTATTGGCTCGAGCCCGCATGTCTGTTGGAAAGCTTCAGAA  
AACCAGAACCTCTCAAAAATGCTGTTCAAGACGGGGAGTGAATCTGTATGATATATTAGAGATTCTGAGATGAATCACTTAAGAAGCGTTTT  
TCATATAGTTTCCAG

>c51091\_g1\_i1\_len=640

TGAGCCGCGAGATCTGAAAATACTAAATGATCCCTAGATAGAAGAGATATGCCTCGTCCGACCAGACGAAGAACAAGCTCTTGCCTGCGTAG  
AAACGAACCTCTGCTACGCTGACCACAATCTTTACACTTAGTTGGCTTCCACCAGTGTATCCGATCGAATGGTCACTGCCAGATGCCAAG  
ACACCCCTCCAAAATTTCTCAATGCAATTTTTCAGCAGATTTCTTCTCTGGGAGTAAGAGGGAAATGATCGGGGATGGGTG  
TTTCTGTTTCGATGAACACTCTCTAGATTAATCTCCACATTTCTGTGCGCACTGTCTGTTGGCGCGTCCAAGCATCTAATAAAGCATCAGTGATC  
GGGACCTGTAATTCATTAACCTCTTGTGATGAAAAGAGGAATCAAAATCCCTTTACTCTCTTAACTGCGACTTGAATAGAAATGATTTCCACTCT  
TCTCTAGCTCTATTTGTCGGGGAAACATATTTGGCTATTTGTGGCTTCGGAGAGCAGCTCGAGCGGGGTATACTTTAACGGTGAATTTCCATGG  
GTAGGAAGAGGACCTCTTCAATTGAAATGAGGTAAAAACGTTCTCGGAAAGACTCCATGATTG

>c7211\_g1\_i1\_len=447

GAACAATTCATGGCCCTTGGTCACTGGTATACTTACTGGCATGCTCGCATCTTGTGCTGACTGCATATATATGGAGGAAATGGCTTTTCATCAGCT  
ATCACATCCGGGTGGGCCAAAATCCAAAGTAGGTAATAGAAAGGAAAGTTTAGGAACGAAGAGAAAAAACTGACAGAATAGCTATGAGGTTGAGA  
CACATGAGGGCACCATCTTAACCTACCATGGCCATCCTTACTTTTCATATTTTTCGACGGCATTAGGATGTGACAATACATTTGATCTTTGTTCCAAA  
GAAGTAATCTCGCACAACCGCACTGCATTTGAGTCCAGCATGTTCCGACCTAACAAATAGAAAACAGGATCCCAATTTGTCTTACAGAGATCAAAAAGGT  
GACCTGATCACATTTACTACGACAACATCATATAGGGTTGTGCGAAGCATGCTTATTTTACCAC

>c8461\_g1\_i1\_len=308

CGGACTATGAACTGAGCACTGAGCAGTTCTGGCAATGCAAAGGTGCAGGCATTTGTGTTGAAGGGTGGTTGGCCACCAGTACTCCATGCATCCAGCC  
TTAAGAAGAACCCCAAAGCAGGGTCTATTTGCAAGATACGGGTGTGACATTTGACGTAATTTGGCTGTGACACATACTGTCATTTATGGGGTGTCTTGTG  
TATATATAGATGGCAGTTGACCAATTTGGTGCACAGTCCCGGTATACAAGGCAGTAACAACACTACTGGGGCTGGATCTTTTCAGTAACCTATG  
GAAACCAGACTAGAGTGTAT

>c8461\_g2\_i1\_len=809

AGTCGCAAAATGGGAAAGTGTACAACGTTGATGCTTCTAGACAAAACATGCCAGAATGGGGTAAACTTGGTGACTATCAATTAGATACTAGAAAACAA  
CACTGTGGCAATGAACACACAAGATGTGAGATGCACCACACATTCATGCCGGACAGTCTGTGTCTATGCCAGAACCAAAAATTAGAAGGTTCTTACAT

GGCAACAATCATGTTGACAGCATTAGTCAAAAATTCGTTCGGGAGCAATGCATATAATGCTAACCAACACAGAAGGTAATGATATAGCCAAAGTTGTTA  
ATAGGCAATGTTGAGATCAATCTCTGAGAGTTGCACCTGCCAAGTGTGCCTAGATGTTATTGGTACATTTTTCATGCAGCGGCTGTGCAGTCAAG  
CCATACATACATAGTACAGCACTGAAAATATCTGAGCCTGGACTGCTCCGTTCCACTCAAACCTGCACATTTAGCCTCCGAGCATTCGAGCATGTTCCG  
ATGGAACCAATGAAGCTTGAATTAATGACATGAATAACAATTTGTAATAATTTCTTCCCAAGTCTTAACAGAAAGTATCACAGTAGAAAATGAAATAC  
AATATCTAGGCCAGCTTATCCAAACAGGGAGATTGTGTACGTGGAATAGATGTTGATGATGATTTGATAGCTTGCATGAACCAAAATAC  
TGGAACCATATGCTTTGTTTACCTCGACGATATCGTTCGTGTTAACGGAGACATTTGAGCATCACGTCCAGCTACTTCAGGAAATTCACCGCAGAT  
TAAACAGAGCCAACCTAATGATAAACTGGAGAAGTCTCAG

>c9280\_g1\_i1\_len=2438

CTCCTTTTTCTTGAACATCTAAACCGTGTAAACAGATTTGCTCTAAAGATCGTCAATCAAGTTGAATTTCTCCATGTCAATCATCATCATCGCCCTT  
GCCAGTAGTGAGGACTCGGATTTGCTTCAATTAACCTTCTCTCACTCCATTAAGACCAGAGGCTGCGGTTTGAATAATCCCGGAAAC  
ATGAGAAAGCATGTTGTGGGAGCTCCAGCTGTTCTTAAATGCATGGTGGGATCCGCAAGTGTGTCAGTATTCTTAGAGCTCTTGCATTTATCTTTCTC  
CACATGGGAGTGGTTAGGGGCTCCACATTTGGAGATTGTGGCGTTGGCAGCTTTGATGTAGTGGAAAGATGGTGGCGGTGTATCAACTCTCTCCAC  
AGTCAGGCCCCAGTGTCTGTCCACATAACCTCTCAGTTGGCTCACCTGTGAATGGGTTGTCCGGATTTCTGATCTTCCAGGAAATACCTCCAC  
CTCATTTGCTCCTGACTGCAAACTCTCTTTGAGACTGCTCTTCCAAAGTACAATTTGGTGTATTTCCACGGGTTGCACCTCCATCAGCGGAC  
TCTAATTTCTTCCGATGCTCTCTTCCAGCTCTCCCTTTTGTTCACACGGTACAAGCTCCTGACATTTGTGATTCCAATGCGGATCTTTGCTTC  
TGCTCCGAGGTGGTTGCTTTGCATGTTTCATAAGGCTTACAGAAGTGTACTTTGCAACGTTGTAAGTGCATCAGGGGATTTATCCCATTTGGTCCG  
GATCCGCGTGGCCTCTGCACCATATTGACTCACCAACAGCCATCTTGATACCAGGAAGTGTATTCCCTACACCAAGCCGGAAAGTATGGGTTTT  
CTTCTGCTCAAATTTATCCACACATCTTCAGATTAATCTTCACTCCAAATACCAGTGTCTTGATCAGATCCATCCATCCATCCATCCATCCATCCAT  
CATACTGTCTCGCTTGCATGAGAGTGTAAATGTTGCCTAGCATCGGTTTGTTCATCCACATTGACCAAGCCGTACGTGGTAGACAAAGCATT  
CATCATGCCATCAGCATCCGCCAGGTGCACGGATGTAATTTGCCATAACGCAGGGGAATCGCCTCTTTGAGCCATGACTGAGTTGGGTGTT  
GAATTTGGTGAACCTTTGTGACATCAAACTGGACAGTGCATGAGTGTGAGGAGTGTGACACTGCAGCCATCACCAAGAGTGTATTTTCGTTGC  
TAGGACCCAGTCCGAGCCATGCCAAATTTACGGGAGGATTTCCATATGGGTTGGTATTAGCAATCTCTGCAACCTGACCTGACCTCTTCAAAA  
GAGCGTCTTAGTGAGCATCCGAATGACATCGCGGAGAGACACTATCCACTTAGTAGCGTCTCGTGGTGGCTTGAAGAGCATGTACGGCATTCAG  
ATCACCTTTACATTCGCTTGTGATCGACGAAATCTTTATCTTCTCAATTTCCCAACATGGAGATCGTGTCTCCCGTATAACTTTGCCAGGGC  
AAGTGGAAATTTCAAGCACTAAAACAATGCTCTCTGGAATATTTCCCGTTGAAGCAATTTGCTCTTCTATCAAAATGAGCTCTTTCTCCGTGCTT  
CAAGTAGGAACAGAAAGATCGCCCTGCATCCATGAGTTTGGGTTACCTGCTCACCCCTCCATGTTACCTTGACAACCTCTCTCTCTTATCTT  
TGTGGCAATTAACCTGCTCCATCCACGATTTTCATCTTCTCGGCGTAGTAGATTCCACCTCGTGGCCTACCACTTCTGGCATGCTCATCAAGCGGAA  
GAAGCCTGAATGAGCTCCATAACCGTATGGTGGTGGGTAACCGTGTCTTGAATAGCTTGTGACGTTGATGTAAGCTTGGGGGCAAGGAAC  
ACTTCTTTCTTCAAGGCTCCCATGTTTGCACGCTTTCGTAAGCGTATCCGAGTTCAAACGCACATCTTGCCTATTACGCTCTCTGCGTTTT  
CCGATAGCCACGAAGTCTTTCGAGGAAAGCACAGCACTTCTATGAGGCTGCCCGGCGAGAGTGTGATATCTCGTCAAACGGGAAAGCC  
GTTCTGCTGTGCCACACTGAGATTGTAACGTAACCTCTATGACAGCTCCCTGCTTCCGTTCCGTTCCGATTTGAAGTGTGATGGCCCTCAATAC  
GGTTTCCGCCACCTTTGGTGTGGAGTGCCTGTCATTTGGAGGGGGTTCGTATACAAATACAACGCACTAACCATGCCAAGCTGTCCATGTC  
ACGCTGGTGGGTTAGTTTGTGATGTCAGTCTCTCTGTTGGTTCGAAGACTGCCGCATAGAAGGAACCTGGGATTTCCGTTGAAGGATCTGGTCTGC  
CATTTGCATGTTTTGTTGAAGGAGGTTAATACGAC

>c33645\_g1\_i1\_len=930

GTGGGAGTGTCTTTGTTGATTGAAGATGCGTATTGTTCCCAAGATTTTTGTGATCGTCTAGGGAAAGGAGAAAAGGAGGGGGCAAGAGACCCAGT  
ACATAGGTCGATACCTCCATGTTTGTAGTAAGGAAGATAACAGTTTATCACATCTGCAGTTTTCTCTGGACATTTGCCAAGCATAAATCCAGATCC  
CGAGATGACACCCCTTGGAAATAACTCTTGTCAATCCAGGAGTCAATTTCAATTTGAACCTCGATAGGACAGAGTGTAAAGACCGATAC  
CTTCACTGGAAAAGCAAGTTTATAGTAAAGAACTCTTTCTTTTGGAGTAGAAGAAAATAATTTGGTGGCCTAAATACAGTAAAGTAGGGTCTTTC  
ATTGATAGGGATAAGGAATCTTGAAGTTGTAGGAGCTGTGGCGCTTCTTACAAGCCTCAGCCTCCAGATTAACATAATCTTTGTTGTCACCTC  
TTTAAAATCATTCAAATTTCCCAAAATAGTTCGGAAGTAGTCCATGATGCTTGTCTGCGAGTAGAAGGAGCTTCAATTTCTCTGGAAAATCATA  
TAGATCTAGAGTTAATTTGTCGCAAACTTCTGGTGGTGGAGCTCTCGAGGGTTTTTGAATAAGACCCTAGGGGGATCCAGGAGTTCTTCTTCC  
ATAATATCTGCGGAGTATTGGGAATGCACCATGGTTGAGGATCGATCTTCTTCCGCTTTGAGAAAACAATCTCCACTTAAAGAAGTGCAGGAG  
ATCCGTTAACCATGACAAAAGGGGGGGGTAGAGAAAGGTCGCTCAGAGCTTTGGTAAATTTCTCCAGGTTTTTGTATTTGATGATAAGTTTT  
CTTTACGGAGACAAACGTATAAAAATATTTCAATTTATTTGTTAGTGTGTAGTTGAGAGTCTCCG

>c50692\_g1\_i1\_len=383

GTTGGCTTGCATATTCAGACCCAGACTCGAGAACGATTTGTCAACCTACTAGGTGCCCCCTCAAGCGCGCTCCCTAAGTGTCCACTTTCCGCCCCA  
CCCCATCGGGAGTTTTTGCAGAGTTCAAGGATCCATCCCAAGCAACTCCGTTAGCTCGTCAACTGGCCATATTAATGATGAGGGGTACTCT  
ATTGAGACTTCGGAACACTGCGCGGTTATGGAAGACTGCGGCTTTGTCCCTATCCGATACCGGACTGGGGGATTTGATGGTTTTGAGAAA  
GCACCGGATCGGCTCAAATTTCTGGATATGACTTGTGCAAGCAGCTTGAATCCCTGCCATGCTAGACTTTATCGAGGAGTATCTCCAGCTCCG

>c8881\_g1\_i1\_len=6498

CACCCCTAAAATCAATCTAGATCCTTTTTGTAATAACAAAATGTGCAACATCGTCTGTTGGTGCAGAAAAGCGTAAGCAGGACTCTCAGCACTAGGTT  
AGCGGCACCTAATGACCTGGATGCTTTCTCTAGAGGTTCTAATGGAGAGTTACCTTCCCAAAAATCAAATGATTACCAGACTTACAGGAGATATAT  
GCATGACATTTTGTGCTTGTCTTTGGTTGAGATGGGAGTTTATCATGAAGAGGAAGTACTGCTTAAGCAAGTTAGGCATCCATATGAATGATCGGAG  
ATTGAACATGCAGAAACCTGATCTTTACACCAAGAGTTGACCAACCTGGAATTTGGGGAAGTAAACATTTCTTCAATGCGCAGGCTGACTCTGA  
AAGGAAAAGAGCCACCTATAAGGAATTTCTAGCCACCATCACAGAAAAATTTGGGTTATTCAGGTTAACTTTAATGTCATCGCGGTGGATCTTGTCTGA  
TACTGAGTGGGAAGAAAGCTTACCACAACCTACCAGCTATTCATGCAAAAATGCTACGTTCTTTTCAATCAAGAAATCTCACCTACATTCACCTCACAGAC  
CAAATTTCTAGTCAATAGGAGAGATTTCTCGGAATTTTATGCATGACAAAGTTTGGTGTGAGCTATCTCTGATATTGGGGATATTATGACAAA  
GGCTACAAGAGGGCCAATTTACTCTTGTGAAACCATGAAGAGGCTTGAATTTCTGGGTATGAACAGCTTTCTGATGCGGAGTACATAGCTCTTCT  
TGCTAAAAGGATACTAACAGGGCCAATAAGCAAGAGGCTTGCACCATCCAGAGCCACAGCTCGGAGATGAGTTAGATAGGAGCTGGGCCACTTT  
CTGTTCTCTAAGAAAACACTGCACAAAATCCCAAGAAATTTACAGCTAGGAGGACCTCTTGGATTCAATTGAGACCTCTACAATTTTGTGATGATG  
CGTGAACAACTCAGGCTTACAAAACAGAACAGGGGGCTATCTTGATATGATTAAGTCTTATTTGGCCAGTAAATGATCCTGATGAGTCCCACATCAT  
AACACTATCTGCTGATTCACAACACAGAAAGAGCAGATGGAGGACCTGGCAGGAAAGCCTACCTTCGGAGAAACGGTCTGAAGACAGAAA  
GAAGGCACCTACACACAGCAAGTTTCTCGAAGAACAGAGTCTTACTGAGGACCTGGTCCAGCAAGTCCAGAGCTCCACATCAGAAAATGAGTT  
GCATAGCCAGCACTACCTCCGTTGAGCTCCATTTGGTCTTCAATGCACACAGTTTTAGAGAAGGTTCTTGAACACACATGGCGAGCCCCCTTTTC  
TGGATTTCTAGATTTTATCAGAGAGCTTACAGGAGATCATTAACAGTATGAGAAGGAAGAAATAGACAGTATGTTTGTGCACTAGTGG  
GTTTCAGGATATATACATCTCAATTTGCACCCAGGACCTCAGTTAAGAACTGAATCAAACACAGAGTTTGTAAAGTTCATATCTGTAGACCCAT  
AAGTCACATACTACTGCTCTTCTGGCTGCCACCGGAGATCATTTGGGAGTCCGAGTGGTTATCAGTAGACACTGATAGGCTAAAGCATTTGGTCAAG  
GAGTTTTGATAGAATATTACAGCTTCTGTGGCATGTAGCGAGAGACTGGTTGAATTAGATAAAAATATCACCAAAGCTTGTGTGGAAAGAGGTCAA  
AAATGGTAATATCAGTTAATGATGACTTACCTCGAGGATAAACAACATCACATCAATTAACAAATCAGACTCTCCGATACTTGTGGATGAAGTC  
CTTAGGACACAAGCAGTTCTTGGGACTCATGAGCAAAATCCCTTCAAGGATTTGGTTCAGTATTCAATCAGTCACTGCTTCAAGGGCAATGAGAAC  
AACAATGCACATCAACAGGAACTTACTGACTTTATTAAGTGCCTTCTCGCCAGGATGACCAAGCCGTTATGACAGTAAACCAAC  
AGGAATTTTGGGCAAGCTGCCAAGACTATTACAAAAGGAGATATGGTGCACCTGTCTTACAACCTCAATGAAATATATTGGTGCATGATGTACAA





>c9237\_g1\_i1\_len=382

GGCTAAGCAGGATGTGAAGGACGGAGGCGCATGCCTCGCAGCCGAGTGGAGCGGTTTTCCGCGGCCTCGGGGTGGAGGTGAGGAAGGGCTACCTCG  
AGGACCACATCGTGAACCTCCCTAGGTTTAAATGCTGTGTCTCCAGGTGATTTCAAACGCCCGCCACGCCAACCGCCATTGGCCACTGGGTGTTAT  
CCTGGTTGGCTTTTGTCTGTTTTGGATTGCGCTCGGTCTTCTCATGGTTGGTCTGTTGCACGCTTCAACGTCGTCGATCCGCTTGTCCAGATGA  
TGATTCCTCTGCGGATGCTACTTACGTAAGGCATTGCTCGATGTTCTTCTAGGGTATCTACTGGAACACAACTGAGGGCAATTGGGATCGG

>c25880\_g1\_i1\_len=513

CGGAAATACATTGTTGAAGAGACTGAAAAACGTGGAGCTCAAGCGGCGCACCCCTCATTTTGACCCCCACCCGAGTTGTTATGGAGGAAGTAAGA  
AAGGCCCTTCGGTGAAACCGAATTCAAGATAGCAACAGCGAAAGCAGCCCATCACAACATCATCTATGGTGCAGCGACGAGGGCGAACTGGGCGAAA  
TGCCCCAGGTACATATGTTTTATCCAGTTGACGCTGTACCAAGGAGGATCCATATGACTGGGTTTTGTTGGCTGGAAGCACAATGGTGTAGACCA  
GCTAAGCATGCCACTAATGAAGGAAGAGTATGCTTATGGACAACCCCTGGAGCTTTTCGCTGATCCAGTTGACGCTGTACCTAGGAGGATCCA  
TATGACTGGGTTTTGTTGGTGAAGCACAATGGTGTAGACCAGCTAAGCATGCCACTAATGAAGGAAGAGTATGCTTATGGACAACCCCTGGA  
GCTTTTCGCTGATCCAGTTGACGCTGTACCT

>c47288\_g1\_i1\_len=272

ATCAAAAGTAAAGTAAAGTAAAGTAAACATGATGAAAGAGACCAGAGCTACTCTGGCGAATTACTTCTACAACCTAAATGTTCAAACCATGCGTTCT  
ATGAGAGAAGCCAGAACCCTTGTGGACATCTAGGACCATATTAGATCTTTTGCCTGAAAGGTAATACATAGCTATGGAGTTCTGCTGAGGGACAGG  
CGCACCTGTCTCCCTCCGTGCCGGTGTGTAGTATTGAGCTTTTTCAACACCTCAACCGGCGCTTGCACCTTGTCCG

## Bangkok contigs

>c39646\_g1\_i1\_len=1084

ATTAATTTGGTCGTAAGATCATTTTTAATCAGATCATTTGCATCAGATGAGCTGGAGTGGACAGTCCCACTATCGCTGTCATCATTTGTCATCATTTGTC  
TGGTTCGCTTTCGTCGCTAGATGATGGTGTGGTGAAGATGGAGGTGAAGGTGCTGGAAGGGTTGAAGGTGCCGAAATGAAGGTTACGTTTCATT  
GGCATTGATTTGACAATTTGTGTTGGTTTTCTGTACAACCCGAGATAGACTATCGGCGACAACATTCTGTTTGCCGATACTTTATGTCGTAATAT  
ATTGTTCTAATCTTAACCTCATCTTAACGAGCCTGTCTTTGAAGTTTTCAAATTAAGGCGAACGTTTGTGGTCCGGTGAAGAGTAACTTACG  
ACCGAACAGATAAAGTCTAAAGTATTTGCACGCCCAATCTATGGCTAGGAGTCTTTCTCTATGGCAGAGTAGTCTCTTCTGTCCGAGTTAGGGT  
GCGTGTGCAAAGGCTATAGGTTTTGTCACCTCCCAATGGGGCTTGCACAAAACCCGACCTAAAGCGTAATTTGAAGCATCTGTGGTTAGCACAAA  
TGGCTTCGAGAAATCTGGTACTGTAGCAGCTGGCTACTGGTTATAAGATTTCTACAGCGCTTGAAGCAGAGATAAATTCAGGTGTATGCTGAAT  
TGCTCTCCCTTCCGCAACTGTTGTGTTAGAGTTTCGCGATTTTGGCGAAATCTCTAATAAATTTCCGGTAATATCCAATCATTTCAAGGAACCC  
TTTTAGTTCCCTTTTCATTATTGGGTATTGGCCATTCCCTGGATAACCCGAAATTTCTCGGGATTGGGTTTTACTCCTTCGGGAGTAACCCAGTGGAC  
AAGAAATGCCACTTCTTCTGAAGGAATTCGCACCTATCAAGTTGGATCTTGAATTTGTGCTTTTTTAGCGTCTCTAGAACCCTTTTTAGATTAC  
GAGGTGCTCTTGTAAAGCTGGTAGAATAGATGATCTGTAATATGGGGATGGGATATCGATCATCGGTAGTCTTTAGGTTGAGCTTCCGATAGTCTGA  
TGACAAGTCGCTATTTCTTGTGCCAGA

>c55859\_g1\_i1\_len=395

AATAATTAATATGGGGGAACATGCGCCGCTACAACACTCGTCTGTTATGAACGACAGCGGCGCGGCTCTCGCGCAAGCGGCTAAAACGTTGTCG  
CGTTCAACGCGGCAAAACATCGCAAAGCCAATAGTACAGTTTTGATTTGCATATTAACGGCGATTTTTTAAATATCTTATTTAATAAATAGTTAT  
GACGCTACAACCTCCCGCCCGCTTACTCGCTGCACCTCGAGCAGTTCGTTGACGCTTCCGTTCCGCTGAGTGGCGAACACCGGAGCGGGTTCG  
ATGACCAGCGGCTGCCGACGCGACGACAAGTATCTGTACACCGAATGATCGTGGGCAAGGCACGTCGGCCTCCAAGTGGCAATATTGGCAA  
ATTCGAGAATT

>c76297\_g1\_i1\_len=529

AATACCTTTTCGAGATTGATTAATGTTCTTGAAGCGATGTTGAGTATACGATAAATATCGTCCATGTATACTAAACATACTTTTCCAATTAAGTCC  
CTTAGGACATTTGTCATCACCTTTGAAAAGTGGATGGCGCATTTTTAAGCCCAAAGGGCATTTTTGAGAAATTCGTATTTCCCATGCTCAACCGTG  
AAGCGGTTTTTACAACGCTCTCTGGGATGCACCTCAATTTGGTGGAAATCCCGAGGCAAGATCAATCGTTGAGAAATAATGTCATCTTCTAGTTA  
TCTAAAACCTTCGGTATTCGGTATTTGATATTTATCGTCGATTTCTTTTATTAAGTTGCGGTATCGCAACCAACCGCCACTTCTTTTGG  
CCAGAAGCGTCCATTTCTTGGGTACTACCCAGATAGGGGACGACCATGGAGAGTTGGATGGCCGAAATAATGCCTTGTGCAAGCAGGTCTCGTATT  
TGAGATTGTACTTCTTCTTCAGGCAATATGGATACCTGTAACCTTTGG

>c82294\_g1\_i1\_len=206

TAGTTTTAAGCTCACCGACATACTCGGTAATTTTTGTAGTCGGCAGTTCTTTTTGGGCGTGATCGTTGTCACCTACGGGGGCAATGTCATCGCTTCGTA  
AAAACCTATTTACAATCAAAGCTCGTGCCGGAACCGGTGCACAGATCGTGCACGTTGCGTCGCAAGCTATTTAATTCGCGCTTATTTGATCTCTAT  
CATAGTCGTGTTGA

>c118388\_g1\_i1\_len=208

TTTTTCCTTCTAACCATCTTTGGTACCTCTGAATAACTTCGATTTTTGGAAGGGTTTTGGGCTAATGCCGTCAGATCAAATTAATGATCCTCGGACTT  
GTCCAGCTGAACCTTAAAGGTTAGCATTTGTTCAATGCCTGGATTATGGTATCAAGGTTTTTCAATGCTTCTCGAAGGTTTTGCCAAATACGATTAC  
ATTAATCCATGTAACAG

>c70842\_g1\_i1\_len=1639

GGCACAACCAGGCGGCTTCTCAAGAACACATGGTTGGCGCGCTTAGTTACTGTGAGCAGCTTAACGACACGTTGGCAAACCTAATAGTGGTCCAC  
AACTTGAACCTCATCACTTGAATACTTGGGTTGGGGATTCCTCACCACTTTCAAGCGACTCGCTACTATTCAGTGGCAACTCTCACCCCTCCCG  
CTCCCTAAAGTGCACAGAGAAGTAAACAGAGTTATAGAACGTAATTTAGGCGTAATGTTCCAAACACCATATCACCAATCCCATCCATCCATATA  
GGTTTGGTTGATGACGATGTTGACATTTATCACCGCTGTTGGATCCAAGATCTCTATCAACTGACAAAACCTTTATCATAAACCAATATCGCTCCG  
AGGAGCTTGACTATTTGAAAAGATTCAATACAGGACCAATGATCTTGATCTTCGCGCTCTCAGAAAATAGCAACGTTTACTTCTTTAAGAGACTTGGG  
AACAAAAATGTTCTGTTAGACACGAAGTGAACCGTAAAGTCAACATGTTATCTTCGGAAAAATAAGGACTTTTCAAAGATAGACCAATGTGCAC  
CAATCTTATTTGGTTCAACATTTCCAGTCCGGGGTCTCGAAGCAGTATGTTTCACTCACGTTGCCACTTTTGAATCATCGTGAATACGCTGTA  
ATTATCTTCAATAGTTAAATCGGTTCCATTGACTAAAACCTCGGCTGCGCTGCATACGTTATCATATCCCTGTTAGCCATCTGAATTTCAAAGG  
CTTGTAAAATCCAGAGGCTCTTGTATGTTGGGGCAGATATTTAGTTCTTATAATGGCCCGCACTTATATAGGGTAACCTCCCTAACCATGTTGGTA  
ATCAAACACACTAGGTTCCCGAGGCGGTTGGGGGGGGCTCTCGTGTCCCTATTTGGGCCCCGAGGGTAACTTATAGTGGACCCAGATGTCTCC  
AAAGTACTGCTCCCTCATCCTTATTAGAGGAACAAGCCAAATAGGCCAAAACCTCGCAAGGGGCTTTGTCATCATAGGATATGTCCCGCAATCTGA  
GAGGGCATACTACTACGACTCTGTAACCGGGACGAGGAGGATCAACTCTTCTTCTGCCATACTGGGACCTGAAAGTTAGGAGTACAACCTTGT  
GACTTTGCTTACTAGGCACAGTCTGTTGGGGTCCCAGTTCGACTCCGACGACTAGAGAGCCATTTTCACTCGCCCCACAGCGGGGCGTACTC

TAGTCTCACGGAATGCCAAATTAATCTGAGAGAACTACCGCTCAGAGTCTTTAGCCACGTCAATTCGGGCCGACGTGCGCTGCAAGGCCTCATAATA  
GGACGTGGAGGAACCTCCTTTGGACACTTAAATCTCGAACAGGAGCTCAGCTCTTGACGGTAATACGCCCATCAGCCGAAACCCCGCTCGGTG  
AGCCGCTCCTCCCGCTTCTTATTAACGCTATTCGCGCTTCTTGGCAGAAAGCGTTAGGTTGCGACTTAGCAACCTTATCGCAGCTACTTGAGC  
AGTTAAAGATGCAAGCTGTTTCTTCAACTGTTTACTCATTGTGTTAAAATAAAGCAATTAAGCTCAGTTATATAAGGGCTAACCAAGGAGCATAA  
ATCACTT

>c28983\_g2\_i1\_len=4421

CATCAGTAGTACCTCTGTGCTACAAAACCCACAATTTAGGCGCTTTCGCATAGACCATACTCTTTAGCACTAAACCGCACCCACGACAGCATT  
CAACAATGCACACCTACGAACTCTATAGTTCAAATCTAGAACTCCCTCGAAGTTCGCCAACGGTTGGTCTCGGACCAACACCCATTTGCTCGTTTTG  
GTACTAACCATCATGAGCTTACTCCCCACCCGACTTCCATCCCGATCATTTTTGTCAAGCTTTCTGTCTTGACTTCAAATCCGACCCATAATCCTA  
TTAAAAAATTAGGACTTTTCCCTCACACCCGACTCCGCTAAAAATTTAAGTTGCATGGAAAAATTACAGACTACGGATCACACCTCCATATGGAAC  
GTCAATCACGCTCCCTTGGCGGTGTTGGTTACGTGGGATGGAAGTTTTCTTGTACTCTTCTCCGCGAGTACAATCTCGGCACGGTGTGTTATT  
TCACCGGAGCTTTCGTAGACTCGAACCCGAATTTCTGTGTGCGCTCGATGCTCAGGTTAACCCCTCCGACTGTGCGCAGCAACCTCCCGCGGTAC  
CGCTTCAGACCACGCTATGGAGGATTTGGTGAGACTTGGCTCCATCGAAGCCATCCGACCGCTGTTGCCCGCATTAGCCACCTGATGAGCTGAGC  
CCGTCGCCCCCGTACCGACACTGTGCGCGACGTTGTTCCACCGTCTCTTCCGCTCAGCTGTACCACCCATTTCCGACCATCTCCAGTATTTCCC  
CTGACTATCTTGAGCTTAGTTCCGCGCGCTCTCCGTTGTGCGCGCGCGGAAATCGACCCACTCCATCGACCGATCTGTATCATATGCTTCTT  
CAGCAATCAGCAGTTTGTATCGCCCTGTGGCTAGATTCGTCAACCGCTCACCCGAGACCCTCCCGTCTGCAACCTCCACTACTTTTGTAGTTCGG  
TGCAAACAGGGCTATCCTTTTCCGACTCTGTACGCACTCGTGACGCTTCCGTCAGCGTTTGTATCGCCGAGCCGTTAACTCAGTCAATGGTCTTATCATA  
ACGTGACTGACTACTGCTACGTCCCGGTTCTTTACCCTTAAGTACCTTTTTTATTTAATTAAGTCTGCCGTTTTTTCGTTTCGCTGCGTACGCT  
TTAATAACCTGTGTCCACCTGTTGGTTGCATACGTGTCCACCCATTTATTCGTGCGTACACCAAGAAACATGGCTGGCCACACTTCCCGTAG  
TGAACGTATGACCGTTTTGTCTGTGCTGCTGTGCTGTTGCCCTGTTTGGCAAGTTTTCGACACATTTTATTCGCTTTTACGTTTACCAGCATCA  
CTTTTTGTGAGCGCGGAATACCGCCACCATCAGCTCTCCGCTTACCACGACAGGGCTTACGGCGACCGTGGTACTTATGACTCCGCTATA  
CTCCTACCGGACTCGCAATFAGGTGGTTCGCAATTCGCGTTGGTTCATGCGCGGACCCACTTATTTGTGTTTTGCTTTCCCTTCCAGCGACTCA  
CCACTATCTCGTCCCATCATCCGACCTTTTCTCGACTTGTCCAGCATCGTAAGTGAAGAACTTACGAGCAACCGGAGGAGACTCGCACGG  
CTTTTGTCCAAAATAGACTTTATGCTATCTTGGTCAATCGTCTAGAGTGTGCTGACTTAAACCCCTTCTTCCATTCGTTCCGCATGAAAGTGTGG  
GTTCAATTTGTTGGAACCTTCCCGTGAACCTGACTGACTGACTCCGATCAGTCTTCTGCGTTCACTACCCGACGCTTTTGGCAAAATTTGCTG  
TCACCTTCCAGATTACGTTTACGTTTCTTATGCCCCGTTTGTAGTCAACACTGACTCCGATAGGACGACGGCATATCATCAAAGGGTGGACT  
ATACCTCCCTACTGCTAAAACGTTAATGCGTACGTTTCACTTTCTATCGATCCCGTCAACCGACCGCTGCCAAAACCAAAGTTACCGATTT  
ACAGCACTAATGAAATCTTTTCTGCTGTATATCATGTTGACGAGGCGCGGTTGACCTGTGCCCGCCGAGACGATTGAACCTGAACCCCGCTT  
TACGTTTTCCGCTGCCGCGCTCATGGATCTGTTGAAATCTACAGACTACTATGACATGCTTTTCCATCCACTCCCTAACACTTTACGAGC  
ACGAGGCTTACCTTGTGCAACTCTACCTTTGACATTTCCCTGCTCAGTGTACGTTAGTTCCCGGTAAAAACGCTTTTAACTTCCCAATACG  
ATTGCTCCGCTTAACTTAAAAACGCAAAATGCCGCGAAAAAACCCTAATACTCAATTGGAACCTCTCCTCGGTTCCAAAAGCGTACGGCAACG  
TGGCTCGACTACATTCGGATGGAATCCTGAGATCTTGGCTAAACAACCTATGATCACTTTATTCAGTCCGACGTCGAACCTAGTAGCTAAAGG  
TTTTTGAACAATTTCACTCGTCCCAATAGACATATCGAACCAAGACTTTGATGAGTGGTTACGGACTCAGGACAATCTGATGTAGTTTCGCAAGT  
TGTGCAAGTCCGACTACCCATCAACGAACTTTAAACCAACCTTTAACTTTATGATAAAAACCGCCGTCAAACCTGATGCAAGACAGCGACT  
ACAATAAGTGGCTCCGTACAACTATTGCCGCTGCTCTTAACTGTGCAACGCCCTCTATTGTCCGATTTTTATAAAGTTAAAACGACGTTGGT  
TATCTGTAATGCGTTCTAATATGCTATTTAACCGACCTTCCCTCGACGAGTTCGAGGAACCTGCTGAATAAGAGATTCTCATCTATCGAGTATC  
TGAATTCGACTCGGATTGAGAATGACATATCTAAGTACGATAAGTGCATGCGCGCTTGGACTTTGTTGTTTCGAGACAGTATCTACAAGGCTCTGG  
GTTTGGCCGATCACTTGTGCTGATCTGGTAAACAGACTCAGCTTATGCTAGATATCTCGACTCGGTCAGCGGTTTTCTCGAACCCGTCGATATC  
AACGTCGTTCCGGAGATGCATCAACCTTTTTCCGCAACACCCCTCGTAAATCAGCTGTAGCCATGGCTATATATGCTGATTACGAACACTCGGGG  
GTGTTTTCCGAGGTGATGATAATCACCTTTGGGGTTTGGACACTCTCCGCGACAACGTTGCTCCATTTATTCAGATATATTTAATTTTCGAAGCTA  
AGACCTCACCCATTTTCACTCTGATTTTCTCGGGTAAATTTATTTGGCGTCCGTCGACGGTTTTACAATTTGCTCCCTGATCCATCAATTTG  
TAAAGAACTTTGGTAGCCGACACTGCGTAATTTGGATCAACCTGACTTACCTTATGATAAAAACCGGCAAACTGAAACCCCTCAAGACAGCGACT  
TTATATACCGACAGTTATCCGAAGCTATATCAGAGCGTTAATAAGTCTATCACTGATTTTTCCGGACTCTTCCATTTCAATTAATTTTGTGCTTT  
CTACTCAACATGAAATCTCTAAACTTTATATACTCTTCCCTGACGACCGCTTTTACTCGATCCATCTCTCCCTTCCCTCGAAGTGTAAACCCAC  
AACAGACCTTCTCGGCCCCAAAGACGTTTGGCTGTTCTACTGCTCCTGATCCCTATGGATGGTATACCGCAAGCGTTATATAACCTTTCTCTT  
CTTACTCTTCTTCAAGTTGGTTTTCTGAGAAACTTTCCGCGCTTGGTCCCTTACCCCTTACGAGGCTTTGCTCTACAGTTTTCGCTTCCGCTG  
ACTTTCATTTGACTCTACAACCTGACCGACACAATTTGGGTGCGGACAGTACCGTGAGTATGTGAAACATGGTGTAAATCAGGTTATTTCTTATGAC  
CTGTGGGGCAACGCTGTCGACGACTGCCCGCTCCCATTTACCTTACCAATGCCGATATAACGGTTCCCATATAATTCGTTCAATCCCTCTCCACC  
TTTCCCTTAGGCTCCGTCGGTTGTCGCACTGCTCCTAACATTTCTACTGTTTCTTTAGTTTAAAGTATCTTAGAATAAGTCAATCTAGAATAAG  
TTTGTAGCTCGCTCCGTTAAATACGTAATCGACTTTGTCACCTAGGTTGCTGCTGACCAAGTGTATCAGCTGACTCGTTAAGGTTTACCGACTCGG  
ATCCCGTTTTGAACTCCACGGGTTGTTTTGTTACATTTGCGATGAGTTTCTTGTTCGTTCTTCTATCTTCAACGTTTTGAGTATCAACACT  
TCACA

>c34693\_g2\_i2\_len=880

CTCGTCCCTAACCTAAACACTCGTCTTTGAAAGTGCACCGTGATAAGCCAACGTGCATTCGTTTTTGATTATTCCTTTCTTCCGCGGGGTGCTGCTT  
TTGTCTAAGACTGGCGTACTTACGGTGTCAAATAGCTAGTTCGGAATAATTTGAGATGGAACCTTTTCTGCTCTGTCTTCTATCTTCTCCAG  
AGTCAGGTTTGTATGCAATGCACCTTCTATCGTTGCCATATGTTGGGTCCGGTTTTGTTTCTGTTTCTTAGGTTATTTGACCGACTGGAGGTCGATC  
GAAATCAATTTCAATTTGCTAATTTGCCAATAATTAATCTGTAATTAATAAACTACCGGTCAGTGACAAGCGTCCAAGCTCCGATAGACTTGT  
CATATTTGATATGCTGTTTTCGATTCTCGTCAATTTAGGATTTCAATCGAAGAGAATCGTTGTTTAGTAGTCTTCAAATTCGTCGAGGGATA  
GGTCGGTGAGGTAGACATACTTCGACCGCATAACGGACAACCAACGGCGTTTCAACTTTATGAATATAGGGCAGTAAAGTGCATTGACGGATTCA  
AAGCGGCGCGGATGGTTGACTGAAGCCACTTTGTTATAATCACTATCTGCAATTTGCCGTTTCACTGCAAGTTTAAATCATAAAGTTGAAAAGAT  
TAGTTAGTCCGCTCGTTAAATACGTAATCGACTATGACAGTTTGGCAGCAAGCTCGGGATTGCTTTCGCTGCGCAACCGGAAAGAGCATGTC  
GTAATATATTTGGAGGTTACCGACGGAACCATGGACGGCGGACGGAGAAAGGAGTGGAGTGGCTCAGGTTCAATTTCCGGAATTTGAGTGGG  
ATCATCGACGCTCG

>c34693\_g2\_i3\_len=853

CTCGTCCCTAACCTAAACACTCGTCTTTGAAAGTGCACCGTGATAAGCCAACGTGCATTCGTTTTTGATTATTCCTTTCTTCCGCGGGGTGCTGCTT  
TTGTCTAAGACTGGCGTACTTACGGTGTCAAATAGCTAGTTCGGAATAATTTGAGATGGAACCTTTTCTGCTCTGTCTTCTATCTTCTCCAG  
AGTCAGGTTTGTATGCAATGCACCTTCTATCGTTGCCATATGTTGGGTCCGGTTTTGTTTCTGTTTCTTAGGTTATTTGACCGACTGGAGGTCGATC  
GAAATCAATTTCAATTTGCTAATTTGCCAATAATTAATCTGTAATTAATAAACTACCGGTCAGTGACAAGCGTCCAAGCTCCGATAGACTTGT  
CATATTTGATATGCTGTTTTCGATTCTCGTCAATTTAGGATTTCAATCGAAGAGAATCGTTGTTTAGTAGTCTTCAAATTCGTCGAGGGATA  
GGTCGGTGAGGTAGACATACTTCGACCGCATAACGGACAACCAACGGCGTTTCAACTTTATGAATATAGGGCAGTAAAGTGCATTGACGGATTCA  
AAGCGGCGCGGATGGTTGACTGAAGCCACTTTGTTATAATCACTATCTGCAATTTGCCGTTTCACTGCAAGTTTAAATCATAAAGTTGAAAAGAT  
TAGTTAGTCCGCTCGTTAAATACGTAATCGACTATGACAGTTTGGCAGCAAGCTCGGGATTGCTTTCGCTGCGCAACCGGAAAGAGCATGTC  
ACCATGACGCGCGGACGGGAGAAAGGAGTGGAGTGGCTCAGGTTCAATTTCCGGAATTTGAGTGGGATCATCGACAGCCTCG

>c36305\_g1\_i2\_len=1763

GATCGATGCGTGGCCACATATGTTGCAATTAATGCTGTCTATATTTTTGTTTACATTGCATTTTTGAGGCAGATGGCCTTACTGCAGTTTGGT  
TACGTTAGGCGTGAGTTGATATGGATTAACAGTGGTCTTAAATGGAATACCATTACAACGTGCATGCAGGTTGCAATAACATGCATAGGTCGGAT  
TCCTGAGTCTGTTAATGGCTGTTGTTGCTGCTGCTGTTGTTGAATCACTACTCTTCTATTTTTCTGTGCTAGGTATTCACTTATCACTTTTAAATCA  
CTTAGCTGGTTAATAGTATGCACCTTCTGTGATTGCCTTTAGTTCACACAGTAGTTGATAATAAATATACACTATCAGGCAAAATCCTATCAGA  
GAAACTATTAACACAATATACAGTTTACAGTTGTTGGTACTTTTCATTTCTGTTTCTGTAGGGTCCACATGTGTTCCGATTATGCTACCAATCTTTGATA  
GTGTTTCTGTGGAGATAGGGGAGATCCTCCACTTTTCGACCCATTCTTTATGTTTTCATCCATGGTCAACGAGGTAGAGTCAATGAAACAGTGCA  
ATGGCGGAAAGCGACGACGAATTCCTCATAGGGCATTGGGGACACAGGAACGGATAGTATCTTAGGAAACCATCCGTGGAGTGAATACGGAAGTG  
AGAGATTATGGAGTGCCTGGAATAACCATACCGAATGCGTCCGGACAGTAAACACACACAGGTCGTGTGGTCCGGGAAAAGGTGGGTTCTCTCG  
GCTTACACTTCAAGGGACGGGAGGACGGATCGAGAAGGAGACGCTCGTCAAGGCAAGAATAATACAGCTTCGAAAATTCATGTTGTGATGAGACT  
ACGAAAATTAATGGAGTGAATAAGCCGGGAAATTCGGTGTATGGAGTGTATAACGTTCCGAAAATGGCTTCGGACAGTTGACGGTATATGTAGGCA  
TTCATTAAGGGCTTCATGTGTCTTTCACAGAGATTGATACGCGCCAGTGTCCAGTTACGAAGATCCGCTTACCTAGTTTTCATCAGTAAC  
TTAATGGGGCCAGGAACAACAGTGAAGCCGTCATGGAGGCGAGGATGAATTTACCGCAAAAATAAGAAGTTTCAAAGTCCGTTAAGTTTGTCT  
TCAAAGTTAAAACATGTCAGTAAATGGGTGACAGTTGTCGAGAGAGACTTCCAGCCCAACAGGTGATTGATCAGCCCAAAAACACCGCCG  
AGCAATTCGTAGTCGGCGTAAATTCGCATTGCGACTGCATGATTGACGAGGGTGTTCGAAAAAGGTTCGAAGCATCACCGGAACGGCGTTGGTAG  
GCGACGGTAGTCGAAAACCACTAACAGAAATCGAGATACCGAGATAGGACATGACTCTGATACCAGATCAAGGCTAAATGATCTGGTAAGCCTAGA  
CCCTTATAAATGCGCGTTTCAAACAATAGCGTTGTGCGGCACTGAAGCCTAAGCTTCCGACCCGAAGCACACCGGATTAATCCGTAACCCGATGTT  
ACGTTCCCGGAAGTTTGAACCTTCGGTCCGACAGTGTGATGTGAAATGTGTAGTGAATCTATCATCAGCCAACTTGTCTAGCTGATGTTGT  
GATCTCTCACTTGAATCAAACCTTGGGAAGGGCCTAGTACCCTATGATTAGGGGAGCGCCTATGTTCCGCTTCAGAAAGATTGATTCAGGGTTGA  
GATCCGATTAAGCGTTACGTAATAAATGGACGCT

>c36305\_g1\_i3\_len=1757

GTGCAAAGTGCTTATGCGCGCTGCACCGAGGCCATCGTTTGCCTATGCGGACCTGACCTATTCTGTTCTGGAAAATGTTATGTGCGTTTTATTG  
CTTATGCTGATAGATGAGGAAAAGATGTTTTGGGTGAATGCGATTATAGCACACTGTCATGCAGGTTGCAATAACATGCATAGGTCGGATTCCTGA  
GTCTGTTAATGGCTGTTGTTGCTGCTGCTGTTGTTGAATCACTACTCTTCTATTTTTCTGTGCTAGGTATTCACTTATTCATTTTAAATCACTTAGC  
TGGTAAATAGTATGCACCTTCTTGTGATTGCCTTTAGTTCAACAGTAGTATGATAAATAAATAACACTATCAGGCAAAAATCCTATCAGAGAACT  
ATTAACACAATTAACAGTTATTTGGTACTTTCTATTGCTTCTTACTGTCGGGGTCCACCATGTGTTCCGATTATGCTACCAATCTTGTATCTGTTTT  
CTTGTGGAGATAGGGGAGATCCTCCACTTTTCGACCCATTCTTTATGTTTTCATCCATGGTCAACGAGGTAGAGTCAATGAACAGTGAATGGGC  
GGAAAGCGACGACGAATTCCTCATAGGGCATTGGGGACACAGGAACGGATAGTATCTTAGGAAACCATCCGTGGAGTGAATACGGAAGTGAGAGAT  
TATGGATGCGCGTGGAAATAACCATACCGAATGCGTCCGGACAGTAAACACACACAGGTCGTGTGGTCCGGGAAAAGGTGGGTTCTCTCGGCTTAC  
ACTTCAAGGACCGGACGGGATCGGATTCGAGAAGGAGACGTCGTCAAGGCAAGAATAATACAGCTTCGAAAATTCATGTTGTGATGAGACTACGAAA  
TTAATGGAGTGAATAAGCCGGGAAATTCGGTGTATGGAGTGTATAACGTTCCGAAATGGCTTCGGACAGTTGACGGTATATGTAGGCATTCATT  
AAGGGCTTCATGTTGCTTTCACAGAGATTGATACTGCGCCACGTTCCAGTTACGAAGATCCGCTTACCTAGTTTTCATCAGTAACCTTAATG  
GGCCAGGAACAACAGTGAAGCCGTCATGGAGGCGAGGATGAATTTACCGCAAAAATAAGAAGTTTCAAAGTCCGTTAAGGTTTGTCTTCAAAG  
TTAAAATATGTCGAGTAAATGGGTGCAACGTTGTCAGAAAGGAGACTTAGACTCCGAAAACACAGGTTGATTTCATCACCAGGCAAAAACACCCCGGACAAAT  
TCGTAGTCGGCGTAAATTCGCATTGCGACTGCATGATTGACGAGGGTGTTCGAAAAAGGTTCGAAGCATCACCGGAACGGCGTTGGTAGGCGACG  
GTAGTCGAAAACCACTAACAGAAATCGAGATACCGAGATAGGACATGACTCTGATACCAGATCAAGGCTAAATGATCTGGTAAGCCTAGAGCCTTA  
TAAATGCGCGTTTCAAACAATAGCGTTGTCGCGCACTGAAGCCTAAGCTTCCGACCCGAAGCACACCGGATTAATCCGTAACCCGATGTTACGTTT  
CGCAAGGTTTGAACCTTCGGTCCGACAGTGTGATGTGAAATGTGTAGTGAATCTATCATCAGCCAACTTGTCTAGCTGATGTTGTGATCTCT  
TCACTTGAATCAAACCTTGGGAAGGGCCTAGTACCCTATGATTAGGGGAGCGCCTATGTTCCGCTTCAGAAAGATTGATTCAGGGTTGAGATCCG  
ATTTAAGCGTTACGTAATAAATGGACGCT

>c36305\_g1\_i5\_len=1256

TGTTTCTGTGGAGATAGGGGAGATCCTCCACTTTTCGACCCATTCTTTATGTTTTCATCCATGGTCAACGAGGTAGAGTCAATGAACGAATTCCT  
CATAGGGCATTGGGGACACAGGAACGGATAGTATCTTAGGAAACCATCCGTGGAGTGAATACGGAAGTGAAGATGAGAGATTATGGAGTGCCTGGAAATAA  
CCATACCGAATCGCTCGGGACAGTAAACACACACAGGTCGTGTGGTCCGGGAAAAGGTGGGTTCTCGGCTTACACTTCAAGGGACGGGAGGGAC  
GGATCGAGAAAGGACAGATCGTCAGGCAAAAGATAATACAGCTTCGAAAATTCATGTTGTGATGAGACTACGAAAATTAATGGAGTGAATAAAGCCG  
GGAAATTCGGTGTATGGAGTGTATAACGTTCCGAAATGGCTTCGGACAGTTGACGGTATATGTAGGCATTCATTAAGGGCTTCATGTTGCTTTG  
CAGGATTTGATACGCGCCACGTTTCCAGTTACGAAGATCCGCTTACCTAGTTTTCATCAGTAACCTTAATGGGGCCAGGAACAACAGTGAAG  
CCGTCATAGGAGCGAGGATGAATTTACCGCAAAAATAAGAAGTTTCAAAGTCCGTTAAGGTTTGTCTCAAAGTTAAAATGTGCGAGTAAATG  
GGTCAACCTTGTCCAGAAGAACTTAGACCCCAAGGTTGATTGTCATACCCGGCAAAAACACCGCCGAGCAATTCGTAGTCGGCGTAAATGTC  
ATTGCGACTGCATGATTGACGAGGGTGTTCGAAAAAGGTTCGAAGCATCACCGGAACGGCGTTGGTAGGCGACGGTAGTCGAAAACCACTAACAA  
GAATCGAGATACCGAGATAGGACATGACTCTGATACCAGATCAAGGCTAAATGATCTGGTAAGCCTAGAGCCTTATAAATGCGCGTTTCAAACAAT  
AGCGTTGTGCGCACTGAAGCCTAAGCTTCCGACCCGAAGCACACCGGATTAATCCGTAACCCGATGTTACGTTCCGCGAAGGTTTGAACCTTTCG  
GTGCGACAGTGTCCGATGAAATTTGTGATGAACTCTATCATCAGCCAACTTGTCTAGCTGATGTTGTGATCTCTCAGCTTGAATCAAACCTTGGGA  
AGGGCCTAGTACCCTATGATTAGGGGAGCGCCTATGTTCCGCTTCAGAAAGATTGATTCAGGGTTGAGATCCGATTTAAGCGTTACGTAATAA  
TGGACGCT

>c46271\_g1\_i1\_len=538

TGATTTGTGCTAGCCGAGGTGGTCATAAGCTTTCCTTCTGCTTAGACCCAACTCCACAACAACGCCCTAACTCTTTACGAACACGAAGCATTCTCT  
TGCTAACTCGACGTCGACATATCCATGCCGAAATGTACCCTTGTTCCTGGCTAGGGTGCATAGGTAATCTTTCTCCAGTATGATTGCCCTCCGA  
CCCAACCCAAAAAACCCTAAATGCCACCGAAAAGCCGAACACCCAACTGGAGACTTTACTTGGTTTTCAAACCGTAAATGGGAACGTTGGCCG  
CACTGCACCTCCGAAATGAATCCAGAAATGTAGCTAAGCAAACTTATTCATTCAGGAGTCCGAGCCCGGTAACCTAAACCTTTTCA  
ATGAATTCGCAAGTCCGATAGACATATCCGTTGAAGACTTCGACGAGTGGGTGCTACTCAGGACAATCCGGACATCGTCCGCAAAATTTTCG  
AGTTTGACGTTCCGATTAACCTAGCGGCTAACAAACCTATTCAACTTACAATCTCTTGAG

>c36387\_g1\_i1\_len=6125

ATGTTAACTTTCACAAGTTAGGGCGAAAGTTTTTCGACCCGCCCAATTAATAACCGGTAAGTGAAGTCAAAGCGACGAATTTACGAGAGAAA  
TAAAACAAAATACAAAACAGACACAAGATTGGTTACGGGCGACAGTTTACCTGCTACATACGTTGACGTTGATGTAACGCAATATTGTTCT  
TTCCGGATTTCTTCCGAGGATCAATGAGTGTCTTCTGAGGGTCTTATATTTGGAACAGAAGACACGGGCTTCACTAGTTGAGAAGTCTGATCTCT  
TTTTATGCACTCCACTAGCATTGAAAATCAGAAGCTGACGTGAGAGGAGTGAAGCAAAAACCTCGGCTTCGGGAACAGTCAATAACAGCCGACCGAG  
GTGAAAGAAAATAGTTAGCTCGGAAGTACACATAACACCTTCCGCGAACATGTCTGCAAGTGAAGAAGTTGACCCGGGTGGCGCTACCCGGCGTCAG  
GATACACCAGCGAGTTCGTGAGATAGTGGTTATGGAGGAAGCGCTTAGCATTTGGCGTCCATTTGGAACCGTCCGATACCTGAAGTCCGACCCAGA  
GGCGCAGGCAATTTGGAGGACCTTGGCGCTGCGGCTACTTACGCTCTTATGCGTGCATGCTCAGTCCGCGATATATCGCTGACCCCTATATGTC  
ATAGGTTACAAGTGGACGCTCGCTGACGTAGAACAATAACGTCGAACGTAACAGGTTGGCCGGGCATATTGATCGGTTACTGGAACATAACGCGGCG  
GGAACGAACCCCTGAGCTGTGACAGACGAGGAGCAAACTGTGGTCAATGCAGTACTTACGCCAGTAGATGCCTCTATGAGATACGTAATTTG



TGCGGGAACCATACGAGCACCTTGCTCGTTGGGAGCACTTCAGTTTCCATTGAGTGCGCCCTTAACCCAATCTCGCAGGGATGGCGCCTGGCTCGA  
CACGTGGTGGATCGGTATCGACGGTTTGGTGTGTCTGGTGTTCGGGGAGTGTGGCAGGATTTGGTTGGAAAAGTTTTCCGGTTGGTGCCTTCTTCTCC  
AACACAACCTTCCGGTCAATTTTCGCTTCCGCTGCCTTGTGATTTGACAAAACGATAGCCTTTCTATTGGTTTTAGGGGGTGCCTTTACTATGTGCGG  
GCTGATCTGGGGTGTGAATTTGACACCACGAGAAAAACCATCTCGTGTGGCAGCGGGCCTTTGTATGGAAACACTTGGCGCTGGCATTTCAT  
GATCATGCTGTGGAACTTGAAGATTACTCGTTCAGTGTGTACATAAAGGATATGTTTGTAGTTGGACCACGAAACCTGTGATTTCGCGAGGAT  
GCTTTGCAGTGCCTAGCCCTGGCAGGGCTGCTTTCTCTGCTGTTGGGTCGATGGGTCTTGAACAGGTGTATGTGAATGACACGTTGGCGCGCACA  
TTCAGTTTCCGAAACCCAAAGAGAACCATTTCCGTCACATTAACCTGATTGACAAAGTTCATCATTTATGTTGCATGGACATGGACCGCTGAG  
GGTGTCTGGGGCATCTACCAACAATGTTTCGGAAGCTATCCGAAAAAGAGGCTGACAAGGTATCCGGATTGTTGCATCGCGGCCGATATTCGC  
AGACTTTGCGGAAAAGCTGTCTCCTTCCAATTCAAGTTCAGTTCAGTTCGCGGAGGCTGTATGGTTCAAACGTTCAAGTTGAAGTCTCAAAGAAC  
TCATCGACCGAGTGTCCACGTACCTGGCGGGCTCGTGTGGAAGAATGGCCGAAGTGTATCACTGACCGCATGTTTTGGATTGAAAAGCACAGT  
TTGGATGGAGTTGCCAGATCACATCACTCGAGATGCGGCAATCACACCGTGTGTTGGCCACGGGAATACACCAGACAGCTCAATGACCTG  
TCAGACCAAGCTTTATTTATTCACCTGCTTGGGGGGGGCAATTTCCGAGTGAACCACATAATTTGGGTACAAGACAAAAGTACTTCCGCTGG  
AACGTTAGTGACATCACCTCATAGAGGGCCAGCTCCTGGCACAAGGTCAAGTGGATTCTAGATGTATGGGGCAATGACAGCACATGTAATT  
GGACCGAACGACGAACTTGGTGTTCGAGTGTGCAAGAAATAGTCCACTTTCAGTTCGTTGACCTTCTATATTTCCCATGGAGATTCCAA  
TTTGGAACTGTCTGAAGCTCAGACCGAATTTAAAATTTGAGGAACTTCCAGTTCGCGGACGAAACAGTTCAGCAGTTCAGCATAATGGAAG  
AGATACGGGAAGGCAACGCGCAATCGGATTTCCGGAAGCGAGGCCACGTCAGGAGTTGGGTTGCGATTGTTCCCTCCTAAATCTCCTGTGCCTC  
GCTATCTCATTGACGCTTATCGGGGCAAAAACGAAACATCGACGCTAATTCGCTATTTCTGACGATTCTAGCTATGGCGTCTTTGGACTCCCC  
AATTTGTTTTTCACTGTGGGGCTATCTGCTTGGGTGTTGTAGTGGCGTCTCATCATCGCAACCGCAAGATCTATTGATGAATCTCTGGATCATA  
CTACAGACTGGGACTCAGACTGCTGTTGGGTACATGATCAGGAAACCTCAATCAATGCTAGGGTCCACATCTGTTGACTGCTGATG  
TGCCTACAGTTCCTGTTCCCGCGTTCGATCGCTATCAGAAATCTCTACGGTCTCCTAGAGCTCATGGCTTCGTTGGTCTGCTGACCGCTAC  
AAGAGCTCTTGCAGGCTCTCCCTCCAGAGTTCATGTTTCAGCTGATAATGGGATGGAAGACGGCCCTGTCTCTCGCTACCGTGTGTTCTG  
ATCTTCAGTTTGAACGCTATGTACAAGTACGATGTCAATATCAAACTCAGGAAACGGCTACAGAGACTTGGCGCGAATTTGTGTTTGGACT  
GTACTTTGGCGAGCTGGGGAACTTGGCGGGGAAAGCTATCAACCAACGTTGGCAGCTGTCTTAGCTTTACAATGATAGTACTGCTTTT  
CTCTACATGGAACGACGCAAGCTCAGTATGAGGCTTGAGTTTCACTCAGCTGGAGAAACCCAGAGGAGTGTCAACCGAAAATGATGACGGAATA  
AATATTCCTGATTTAAGAGGGCGCTATGGAGAGGATGGGATCGTCTGGGGCGGCTTCATCGTCTGGCCACCTACCTGAGCTAGTATTCGTGTTT  
CTCTAGGCTTTGGCGTACGCTCACTTCTACTTTTGGGGCACTCTACTGCTCATCGCAACCGACCTAACCTTCCCGTGCACATAATACGG  
ATGCTGCGCATGAAGCTCACAGCTAACACCGATCTGATGTTCTTGGGACTCGGCGGACCTATTGAAACTGATCTCCAGACTGTTTCAAGAC  
ATTTCCCAATGGAGTTTATCGCATCTGTTGTCGACGCTGTTTGGCGACCGCAGCGGGGCTGGCTTTTCGAAAAATGAGGCTATTTTACACTCTC  
ATGCACGCTCACTCGAGGTGAACAGTAAAATGGCGTGGCGAGCTGTTGTTCTCACTCCGGTAGTGCCTGCGCGACGTGGTGTCTGATGGTGA  
CCTTGGCAGTTGGACCCCTCACTACCGGATGACCTCGTGTGATGGCTTGAACCGGACAGACCATTGAGTACCATTGGTACAGGCTGGA  
GCTATGATATTGACGTTGAACTGTCTGATGTTTATTAGTATGATTTTCGAAAAGGATCTTCTGGCTCCCGTCTTCAATTAATGGCGAGCCGTT  
GGGTTCTATGGTTTTGGGTTTCTATGTAACCGTATTTATCTGATGTTTGGCGACCGCAGCGGGGCTGGCTTTTCGAAAAATGAGGCTATTTTACACTCTC  
TCGACCAGGCGGTTCTGTGACATGGCATCCAGGAAAAGGAAAGACGCGCAAGGTTATGTCGAAGAAACCAAGAAGAACTATGATTCACCAACCGG  
ACTGTGATCTTAAACCCACCCGGGTGGTGTGATGGCTGAGGCTGTTGAGGCTTGAAGAACCTCAGGATGAGAGGTGACAAGAACCTGTCTACTGC  
ACCAGGAACCTAATAACGGTTGCTATGTCACGCAACGTTTCCAGAAATTTGCTCTTAGCCATGGCGCAAGAAAGTCCGGGTTGCCATGATCATATG  
GATGAGTCCACTATGCTTCCATGCTTCCATGGCCGCGGGGCTGAGGAAATATCTCCACAGCAAGGAAAGAAATGATTTACATGATGTCGA  
ACACCACCCGGCCACGCGCTGATGTAGGCTCGAATTACGCAATAAGTGACCAATCCATTAGTTTCCCAACCTGGTTGAGTCCATCGTGGATTGGA  
AACGTTCAAAAATCTGTGGGGGCAAGAAAACCTTCTTATTCGTCCTCCATCGCACAACCAAGCTAACACCCCTGGCTAGTGTATTCTGGATCTGTT  
CAATTTGACTCGAGCAAACTTTCCACCAACTATGCACAAGCAGGTGATGCTGCCACCGCCCTGGTAATCTCCACCGACATCTCAGAAATGGGAGCG  
AATTTGGCGCTCGATCTGTTTATAGACTCAGAACGCTTTCGACCCCTTGTGGATTCTGCCACAGAGTGGTGAAGCTGGTGAACCAACATTAAC  
ACATCATCCATGATCCAGAGGAGAGGGAGGACGGGTAGACGGGAACCGGAACGATGTTGATGCCATTGATAGTCAAACGGAAGAAAATCCAGTG  
TCATGGGTGTGTTGGCTGAAGCCCAAATGATCCTGGACAGCTCGGATGACTTTTATGCTAGAGGAAGCCGATACAGCCAACTCCGGGGAGA  
TTACCCCTGGTGGGAGGATGAAATGCGATTTTCAAAGCTTATGGATCGGGATGACATTTCCCATCTGGTTAGCGTGGCAGTGGGCGAAGCTGGA  
GACCGACCGCTACGCCCTGTTTTCAGGGCAAGGAAACCGGAAAGATCATCGAAAACCGATTTCGCAAAACAGAGTACCAGCAACATCGTTGAT  
GACCGCTTTGAGAGCATGAGTGGGAGACGCGAAAGGATCCATTGATTTCTATATGAACGCGGTGGAGGGCCTAGCCTCTATGATTTTTTACA  
TTGATTGATTGGACCGATATATGGAGGAGAACGACATCTGCTCTCGGATTTGAGTACGCTCATGAATGGAGAGCTGCGTGAACCGTCCACAAC  
GAGCGCTCTCTTACCGTCTAATGGCCTTTGCTTGGCGCTCTCAATGTGCTCTCCTGTTTATCGCGCTCTGGGCAATTTGTTTCTTATCTCT  
TTGTTTAGCGCTCTCGCAGGATTTCTTATAACAAATGCTTATGAACAGCTTACTGACCACTTTCGCGGCTGGTGTCTTGGTGTCAACCCCTTTTAT  
ATGGGAGTCCCCTTGGGGTTCGCGTCTCATATCACTGGCTATGTTCTTGGTGTACCAGTACTGTACAAGTCAATTTGAAAATCGCAGTTACATG  
GACAGCGACTTGGTAAAGTGGGTGCTTATAGGCTCATGCTGATCTGCGGAGTGTGGCTTGGGAGATGCGAATGTTCCCGAACATACGTTGGCGC  
CTCATGGAGCTCGTGAAGCTGCTAAGGAGCCGAGGTGGTGTGAATTCGCGGCAATTTTTCCAGGTTGGGAAATGGCGCGGGGAAGGGGAGCG  
ACAATGTTGGACTCTCTGCAAGTATTTCTTCTATAACAGTGTGTTTCGACAAAATCTTGTACTGTTCCAGGAGACTCGCAGCTCCAGATGCTGAC  
GCCATGAAACATCCGGAGATGGTTAGCTCGATTGGTGGATTGAGATTTGATGAAATTTCTTTTCCAGGCTGTCTTCCCTCTGGCTTTGCCATTGTT  
GCGATTGCTAGCCCTCAAGCGTGGTGGTGGGTTTTCTGGCAGCTAGTGTGTTTCAATGGCCATCATGTACTGTCAAACAAGTGAATGCCACCCCA  
AAGATCTTGACAGCATGGACCGCGCAGCAGACATGATCTCCCTGAAATCACTAGTAGAGTGGCACTCGAAAACACTCGGTCCATCATG  
TATGCTTTTGGCTGATCTTAGCTGTTTGGGCTTTTGGGCTTTTGCACACGCTTCCCGGATTTTCTCCGAGGGTATTTTCTCCGAGGGTCCGAGATG  
TGGCAAATTTCTCCATCCCGGTCAAAGATCCATGATGTGATGGATTTTGGCTCCATGGTGTCTGCCATAGGGTGTGTAAGAAATGAACTACCTTTT  
TATAGGTTTATGACATTTCCCGTGTAGAGCTTGGCGCGGTAGCCCTTCAACAGTTCGAGCTCTAGAAAAGTCAAACAACGATTTGGTCTGGGA  
ATGAAATGGAAGATGACCTGAAATGCTTGTATGGAGATGATTTCAAAAATCAAAATCACGCGGGGTAATGAGACGGAGCGGGGTGATTTATGTC  
TCTCGTGGCGGCTCAAATTTGAATGAAATCAATTTCAAAGTACAAATGGAGACCGAGTGGTTCGATGTTGGATTTGAGGATTTGGCGCGGTGGCTGG  
AGCCAGCGAGCTGTGATGGAGGAAACGGTGTCTCCGCTCTCGGGTTCACAATAGTGGGGCGGAAAAGAGAATCTCAGCGATTCTGCACGAAAG  
GGATATAACCTGGCCACGCTAAAGACTGGAGTGGATGTGATAGCTCACCCCATTCGCGTGTGACACCATTATGTTGTGACATCGGAGAGAGTGT  
CCCAGCCCAATCAAGGAAAAGACAGAACTCTTAAAGTCTTGAATTTGGTGGAAAATTTGGCTCTTGGTGAACCCGGGAGCCCATTTTGTGTGCAAG  
ATTTTATCACCATATTTCTTGAAGTCTCCGAAAATCGAGTCTCTCAACACCTGTACAATGGCAGGTTGGTGCCTCTCTCCACAGTCCGGAAT  
AGCTCAGCTGAGATGTACTTCATTTCCGGGGCTAGGCTTAACTGGTGGCACCACGATACATGACGCTGGCTGCCTTAAATGGCCGATTTCTCCGA  
CATTAGACAGCGTTGCTCTCCGAGTCCCGTGTGCCCCAAGGACACCGGGCTGACCCGCTGCCAGTGTGGCATCCATGGATACATAGCGACATG  
ATGGATCGTGTGAACGCTTGTGAACGAGAACCCTGGGACTTGGTTTGAAGATCAACAACCCCTACAAGAGTTTCAAGTACTTTGGATCGTTT  
TCCACCGATGATGGAAGTTGGAGGTCAGGCGGTGAACCCCTCGTTAGAAAGATCTATGGCCATGGGAGACTTCCACGAGTGTGGTGGGTTTT  
TCCATGACTGACGTGTCTACTACTCACAGCAAAAGGTGCTGAGGGAGAAGGTGGACACTGTATCCCCCCCCACCCACAGCATATACGACGGGTT  
AACAGGACGATCAAAAGATTTTATCCGGTCTTCAAGAGTCTGTAACCTACGACCGCTATCTTATCAAAGAAGAAATTCATCGCAACGTTTCGA  
AATGATCGCGCTGTAGGATCGTGGAGCAGGATGTCCGCTGGCGAGATGTGCAAGAGCCATTCAGGACCAGTCTCTCGGGATCTCATCGGAAAA  
GAAGGGGCTCCACTGCAAGGAAAGTGAATGTTGTATCAATACTATGGGCAAGAAAGGAAAAGGAAAAGGCTTCTAGCTGTTGGTGGGCAAAA  
GGCTCAAGGACATTTGGTACATGTGGCTTGGGAGCCGGTCTTGTGAGTTTGAAGCTCTAGGGTTTCTTAAATGGGATCACTGGGTGAGTGGGAG  
CACTTCCCTGGGGAGTTGGAGGCGTGGTGTCAACTATTTCCGGTACTACTTGAAGGATATTTGCCAGCAGGGGAAAATACCTTTTCCGGGACGAT  
ATTTGCTGGATGGGACGAAAATTAGTGGAGGAGTCTGGAGGATGAGGAGCTTCTTAAACGCTTCCAGGACCTCACCGACGCTTCCACAGCGCTT  
ATGGCGCTTACCATGCGACTGGCATAATCAGAACATTTGGCCATGTTCCACGAAACACTCAAATAACGGTACCGGAGCCAGCTGATGGACGCTGTT  
GGTCTGAGACCAACGTTGGTCAAGTAGTACATATCGCTGAACCCCAACGAAATGGTAAAGTCCAGGTGGCGGAGTGTGAGGTTTTAGAAAAT

GAAGGACTACTGCACGCGGATGAATCAGTGTGGATGCGTGGTTGGAAAAACACCTGAAGAAGCTCTCGGAAACATGGTTATCGCTGGAGACGAC  
GTTGTTGTGTGCACAGACAATCGCGATTTCTCATCAGCTCTCGAATATCTCGAGCTGACGGGAAAAACCCGGAAGAACGTCCCACAGGGAGCTCCC  
TCCAGGATGGAGAGCGGATGGGAAAAGTGGAGTTTGTCTCACCATTACCATTAGATGTGCTCGGAAAGATGGCAGAATCCTCATAGTACCTTGC  
CGACACGAGAATGAAGTGTGGTGTAGCCGACTGCAAAAGGGAGGGGTAGTCAGCATTTCAGAGAGTGTGTCATGGCCAAAGCCATGCCCCAG  
ATGTGGGCATTGTATTTTTTTCACCGCGTGTATTCAGCCTAGGTTTCATTGTCTGCTCGTGGCCTGTGCCAACCAATTGGTTCCCTCTAGACGT  
ACCTCGTGGTCCATCAGTATCACGAATGGATGACCACTGATGACATGCTTCGGGTTTGGAAATGATGTGTGGGTACACAACAACCCGTGGATG  
CCAAACAAGGAGTCAATGAATCCTGGGATGACATCCCCTACCTGCACAAGAAGCAGGACATAACCTGCGGAAGTCTGATCGGGCCAAAGGAGCGC  
GCAACGTGGGCACGAGAAATGAAAATAGTGTATCAGCGTCCGGAGGATAATCGACGCAAACTGGGGTCTGAACACCTACAAGGACGAGCTC  
TCAGTTATGAGTCGATACCGAAGAGGAAATGATGTCATTTAGACGTAATCGAATAGAGCCGTGAGGAACCGCCTCCTCCGGCTATATGAGCAGG  
GCATGAAAATGTGGGCATGACGAACCCGCTCCCGGAGTCCCCTGGCAACAGGGTGTGTTCCACACGGAGCAGTTCGAGCAGGGCACATTAGT  
GTCGGCGTGGACGACCCGCTCCCTCAGTCCCCTGTGTAACAGGGAGGGCACTTGCACCCCGTAGGAGGTGCCCGCTCCGCTCTACAAAA  
CCTCTGATCACAGGTACCTGATCTAAGATGGTGGTGGCGCCCATCTTATCATTAGCTAGCTGATGGTCTTAAGCATCCCACCATGGAATGGGT  
AAGAGAAGCTGTAAACAAAACCTGGATGGACCAGTGTCTTATAAAATGGCAGCCAAAGGATCCAGAGCTTTCAAACCTGGACGGGCAACAGG  
GAGAAATCCCGGGTAGCGAACCTCCTCCGTTAATGTGAAAAAGTATGGGAAAGAACTCATCTTAACCTCCCACCGTTAGGGAGTTTGTATAATC  
TTT

>c27006\_g1\_i1\_len=1437

CTGCGATTATCAAATTCGGGTCCCTTTTTAAAACTTTTTTAAATAAGGTTCAAAGGTCATTGCCTTCTGTAGGGAACAGTAATTTCCCATACGTGT  
AGGAAAGTATACCCATCTTACTACACTAGTCTGCGATTATCAAATTCGGGTAAAGTGAACATATTTCAATTAAGAGATTTTAAAGCTTGATTTAGAA  
TCAAATTCCTGGAGAGGCCCTAACGGGTAATACTTAAAGTTTAACTTCTCTGATTAGTTTGGCAGACTCGGGGTAGTCCAGGCCCTGAAACTA  
ACCATTTCAAGCCGTTTGAACGTAGCGGAGCTACTTTCAAGGTCATTCCGAATCTATTGAATGTACATCAATTGTACCACCCGCGAAACACTGCA  
CGTAAAGCAATTAATTTGGGAAACTTCTGACATTCACATTCAGTCTCCTGTTTTGGTTGATTGTATCGCCCTCGTATTGTAACTAGGTTCTAT  
AGTTCATCTCTATCAGTATCCGGAACCGCAGATTTCCGCCCCAAGAAATCCCCTCCCGCGTTACACGGCAAGAATGACGGGAATGAAGA  
TGAAAGTGCTGAGAATCCACCTGAAGTGACCTATCAACCATGGAACAGGGCCACTATTGTTGACAATTTAAACAATAAAGTTGTATGTACCGTCC  
ACAGCCTAACAGGCGAGATTTGGGATCAATTTGGACCTAACCAACATGGGTTTAAACCATGCGACGAGGACCATACGAAGAGTGAATTCGGTATAC  
TGATCAAAAATTCAGACCATCCGTCGCTGGGCATTAGCGGGGAGATGATAGCTCTTTCTGTGTAAGATTTCCCTGTTCTTAACAAGGATAAAGCCG  
CCGTGGATCAGTGTGTGGGATAGTGCACAGGGTAAACGCTAATCATACTCCAGCTCTGGTTATAGATTACCATAGCCCATCAAATGGCTGTAC  
ACCCGATTTCAAAGGATGAGTTTGGTTTGAACATCTTTTTCCAAATTCATGCGATGGTCCAGCTATATGCTACATAGGCATATTTAGGCGATTTG  
ATGGACCGTCAAACCTACCAGCATTTAATAGATGCGTCGAGCAAAATGGTGAAGACATTAGATTTACTAGTACTAACACAATAAGAGGTACT  
CGTTAGATGAACGACTGAAGAAAGTGAATGAACAGTTAGATGATCTAATCGATAAACAACCTTCTATAATTAGTGAACCTCTCAATGAGATCCCAA  
TTGGAGCCGAGCTGTAACTTTGACGCTAAGGATACTATAGTAGATCTATTTCTGAACCTAAGGCCCTCAGAACAACCTCTCTCTCTGCTCTA  
GTTTTGACTTTGTCCCGATTCCGAATAACTTTATATATAATCTAGCTCAAGAAACCATATCCCAACCTCGTAAAGTTTCTAGAGTGATTATA

>c123170\_g1\_i1\_len=521

GTTGGTCCCTTTGACAGGGCCATCGAATCTCCACTCCAATCGTACGTAGTTCATGATGCTTGAAGAACTAGCGGGGAGGTTGTAATAGCTTCTTC  
TTTTCCAGTCTTGTATAGCTTACGGATCACAGTGTCTCGATGCGAAAGAGGGAGCTGGTATCCAAGCGTGGTGGCCCGGTCGATCCGGCATCCATC  
ATACCGCAGAGCTGGTCACTATCATCCAAATCATGAAAATCATAACAGTAAGGGCGATCGTCTTGTCCGTTAAATTCAGACTTTGACGCTGTGG  
ATCTTCATTTGGACGGCTGGGCTCTGAGCAAGTCCGCTGCCCTTTGGGTCCAACTGGGCTTTGATCTTGTAAACAAGATCGCCAAAGTTGGTATCG  
CCTGGCTTGGAAATCCATGCTAAAGTCAAATGGTTCCAAGGCTGATAGGCAACCATAGGGGGTCTGTGGTGGTTGGGCACTGCCTCCGAGGAAC  
AAACGGTTCTCGGTACTCTTCGTGCCTCTGTGCCTCTGGG

>c36375\_g1\_i1\_len=6510

CTTACGGAATGATTTCTCATTCGACTATTAATGAAAACAAAACAAAACACTAACACGCAATTCATGCGCTCACTAACTCATTATAGTCGAATGT  
TGAACCTGAATTTGTAGCGTTCGGTTAGGGGTGAAGACCGACTCCGTAACATTTCAACATCAGATGGCTCAATTCGTTGAATCAACTCCTCCTTA  
TCCGTGCGGAAAGCTTCCATACCAAAATATGATTAGGAGCTTCGAACAGATGAATAAATTTTTCTTTATCCTCAAGTAGTCTTTCAAAGGTTT  
AAAATGTAATCAATACGAACTTATATTTTTTCTTTCTTTATATCGACTGATAAATCTTTCTTTAACAGCTAAACATATACTATCATTTAAT  
ATCAATTTAAATATCACTGAATGACACGTGATAAAGTTCAATATGTTCTTTACAGCGCATATCACTTCTTCTAACCGCACTATTGCCTTTAA  
GGATCTGGAACGAAATACCAATCCGCTTCCGCTTGTACCAAGAAATTTAGATGCAAAAGTACGGAGCTTTGGTGGTTTCCACTTTGCATATAAA  
TTAAACGTTTCAGAAATAAACTGGTACGATCAACAGTCTAACATCTTTGAAAAGACAACCTAGACTATCATCTCTCCAAAATACCTCCTATT  
GCTCGTTTAAATCATATGTAAGGCTAAAACCATCATCGTCACTAAAGTATACCCAAAAGGTAACACATCACCCTTCTACGCTGAAACTGA  
GTAGTTATGGTAACCTCTATTTCAATAAACAATAATTTGTTTATAGTATGGCTTCAAACCATCCTGTAATAATCTTCACTAATCCAGTCTT  
CTCATCAATCTCAACTGTCGCAAAAGTAAATCTTCGCTTACTTTTATCAAACTTCAATAAATCTTAAATCTTAAATCTTCTGTCTGCTACT  
TGTAATAACTATGATATGTCGCTCAGTTGCATCAGATTAATCCATCATTGATGAGCCATTTATCATAGATAGATTCTTTCAAACACAAACCA  
ACGATTTTGTCAAAGTTGTTAAACTAGCGGTAATAAGTGGATGATGAGCTGTTAAACTTGACCGCTAGTTATTGATCATATAGATATTGTCT  
AAAGGTGGTTTAACTCCTGGTTTAACTGACAATAATACACATCTGACCTTTTGGTACCGTATTTTCTAAATCAAGAACTACGTTGTAATTTG  
GTACGTGTAGAATACCAATCAATATAAATAAATACCTGATTTTATAGCTGTTTTCAGTCTTTTATGATGATTTTCAATTTTCAATTTTCAATTTTCC  
ATAAATACATCAACTACCTGTTTTATAACCTCAGAAGAACTGTTAAATGTAGAATTTGGTGGGTTAAATACGACGTTGAATAGCAAGTAGAAT  
TCCGCAACTGTGTTTCTAAGCCGCTTGGCTGTGGTGTGTTGAAAGTTAGGAGTACAATACCTTCAACTTTATACGTTGAGAAAATATACTACT  
ACAAATTTGATAACTCTACGTTTATATGCTTATCCAAAGGATAAATATCATAGGATTTTACGTTGTCGATCTGTATAGATCGAATCCAAGCAA  
TACTGAAGCATCGCTATAGACGATCACTATTGACTTTACTTAAATGTTGGATAATCCAATTTTAAACAAGTTGATCTGTATTTGTACAGATTCATTA  
AAATTTAGACCTCGATCTAATGATATCATCTCCAAAACATCATCAAAAATGTTTAGATTTTATTAAGCTTGATATATTGATTTTCTCTCCTA  
CAGGATAAATTTATCTTAGTACTTTGGCTAACTTCAGTTTTTCAGATCTTTAAATTCAAATGATTTATTTAAATTCAAAATTCGACGCGCACATCT  
CCCTTACTACCGTACGATAAACTAATGTTTCTCTGTGGCGACTAAATGCCACAACATATAGAGTCTGCTCGCATAAATGATATTTATCTGAACT  
ATAAGTCTGATGACTTCTACATGATCGTAAAGTTTGAACCTTGACTTTTCAATGATTTGTCATCACTTTTATACCCAGAAATAAATCTCAACAAAGTTTCT  
TTTTCAAACCTGAGTAAATGTTAAATAACACTTTCCAATATCATTACGTTGAGGTTCCCTTTCTCCTTTACGACTTTCACACTACCAAAAATTTGT  
GAAGCAGTTTCAATATTTGGGATAAACACGATCAAAATATATGATCATGATCTTGGTAGTCTATAAGTCAACTTCTAGTTGTAATTTTATCAAAA  
TCTATAACACTCAAATGTTTCAATTTCAATTTGATTTACATCTATTTATAAACCGTATTTGGTTTGTATCTCCGTACATTTCAACTCTCTACACTTA  
GCTAGAAAACATACTATTAACATCTCACCTGGATGATCATTTAAAGCTTCACTGCAAAAACACGACTTACCTCAGGAGTCCGTTTAAACATTTA  
GAATCGTAAGTGGGATAATACTCACTACGACCAAAATTTTTGATATAGTCTCCAAAGCAGCTCGCGTGTGTACAAAATAAATCTTCAATTTTTA  
CTGTGATAATGACTTATGTTATGTTTTTACCACAAACCCGTTACACCATCAACTAATAAATTTATGTTCTCATATTGATAACTTAAATTTTCCG  
TCTAACCTTTCATACACTCTTCTAGTACTTCTACTCGGATGTACTCTACATCTGATTTAAATAAACAACCTTCTATTTTTTAAATACAAA  
TCATATTTGAATTTATGTAATCAGAATCTTAAAGTACAAAATCTTTGCGTCCCACGCAAAAAGTAACTTTGAATCAGGTTGTCCATTTATGAT  
TTTTTGTCAATCAAATCAAAAATAAAGTACTAGTTACTGCTCTCATATAATGATCCTCCTGACAACCTGTGAATTAATCAAATTTACTTATTACA  
TTAAGTTCAGCATGATATTTGACTTAAACCTCAAGTATAGCCAATGACCGTTTCATGCTGGCATTTGTTCAAACATTGTAATTCACATTT  
AAAAGCATACTCTCAACACTTGATATCTCCTTACAGTGGGTTGGTAAAGTTTAGGTACCAACCCCAAGGTTATGCACCATTTGAGTAAATCTCT  
CTTTCGAAGAGTAAATACAGCGAGTCAATATTTTAAACGGATATACGTTGTTGATCAATAAATACTAGACACACTTCTCAGGCGGTAATCACCA  
TAATAAACAGGTTATATGATCATACCTATCGCTTTATTTGCAAACTCAATCATATGGATGGAATCGTCAAAAAGCAGGCTTTCACCC









GCCAGACCCATACCGCCGGTTTCCGCCACGCGCTGCGGAAAATCAGACAGCCAGGTGCTGCCAGGCTCACATCCGGTTCTTTGCTGGTTTCATGC  
AGACGATGTTTCATCTTCGATGTTCCAGGGTCATATGATATCTCCTTAGAATTCATCGCTGTTTCCTG

>c33969\_g1\_i1\_len=1727

AAGGACTTCCCCTTTTAGAATATTCTATTAGGAAAAGGCTGGAAGCCGCCAACCGTATTTAAATGAGTTACGAGGCTAAGTATATGAAAACCCCTTC  
CCTCGAGGGGAGGGATACCCAGTTGACCTAAGAAAAGGCGCGTACCGATCGGATTGCCGAAGCCTTCCACAAGGAAACACTTTGGTGACAAAAGTAGTAG  
ATGATGTGACAGGAAAGTTTACAGGGCGACCTTAACATCAGCTGAGATGAACGACGACTTTATGAAGTTTGTATCGTCGTCACGTTCCAATGATAA  
AACAAAGACCTGTGTACTTTTCCATCCTCCAGACACTCCGTGAAGAGTTAGTACCTGAGAAGAAGATAATCCCCTTACCACCAGGTTGGAGCGTGGG  
CAGCGCCAGAAATCCCAAAGGACAAAAGTCTGGTTTACCTTATCGTGAAC TAGGATACAAGACAAAAGGGGAAGTCTTGACCATAAGAGTAATC  
GAAACGAAATCATGGCCACGTGGTATGCAGTAGGAGCAGGTAACGTGCACCATTACCAGACACGATGATTTTCTACCGAGCACAGATCTGTAATAA  
CAGATGATAACAAAATCCGTGTCAGTGTGGTTACCCACTAECTTTTTAGTGAGGAGGTGCGTTGGGTGTATCCACTCATCGCTTATCTGAAGA  
CGTGTACAAGCGATTTCCCTATAGCGTACGGCCTAGAAAATGGCGAATGGTGAATGCGATATATCAATGAAATGTGTAATCGTTACCCCCCGGAT  
CAACCTTCGTGATCAACGATTATCGCATGTTTGATAAGACCGTTCACCCTGGCTCATACGTGATGCATTTCTATTTTAGCAGACTGTTTCGATA  
TGGGTCTGTGCGAAAGCTCAGATGGTTAATATGGGAAGTTGATGCGGAGAAGAGCTGTGACGCTTTAAACGCATGATGCGCTACTTCATAAATA  
CCCCCTTTAGATTGAATGGTGGTGAAGATTTCATGAAGCAGCTTCCCTCAGTTTCTGAGTAACTAACATCGTCGGCAGCATCAACACG  
CGATCATTACAAGATATGTGTTTACAACACAACCTGGATCCCTACCCTTCGCTGCATTTACATGGGCGATGACTCCTTCGTTGTAGTTGAAGGAC  
CCGTTAACCTCGAAGATTTAGCAACAGTAGTTGAAGAAAATTTCCGGGTGATATTGAATACAGATAAGAGTTGGGTGACCACATCTTCTGTTAACG  
TCCACTTTCTCGGGTATTACAATCTTGACGGTGTGCGTTTAAACCTCAAGATACTATTATGCGTCCCTCATATGATCCCTGAAAGAAAGCCGGACG  
ACGTTACGACTACTTGTGTCGTGGTCTGGGACGTTGTGGTCTCGTTGGGAAGTAAAGTGGTCAAAGTGGAAATGATGCGCTCAAGATTTA  
TGGAAAACACAGCATTTCCTCCAGTGGATTGAAGACTATCTCCACAGATACCCAAATCGATTACGATTTTGAAGACCTTAGGCTTAAATCCTG  
TCGAGTTAGGGCTCCCGGAGCCTAGTTTGTGGGGGTTGTTACCATTGTAGAACCCTCCCAATCGCGCTTAGGCAGTTCAAGTCGAGGTACAGAA  
ATTTGAAATATCTGTATTACGCTACAACGAAGAACCCTTACCACAGTTGGAATGGAGGAATAATAAATACGCGCTGGTAACGTACTACCCCC

>c33559\_g1\_i2\_len=374

AAATGTAGTCACTACTCACTACAACACTGAGAAAATAAATCTTAAAGCCCCAGTTTATAAGATGGCTGTTTTTACTACTTTGAATGATGTT  
CGGGAGGAGATGAATTCCTTGTCTCTAGATTATCAGATGAAGGCTTCTGGACAATCCCAAGGAACACGCTAGCCGAGTTTGAAGTAAACAGGCTTA  
GATGTCCTTGGCATTGTTTCGTGACATTGCCAGAAGGGGGCAGCAGCTGGAAGTCTCGAACCGATGTCCAAGGAGACGTCAGTTAACACCACCT  
AAATAGTAACACACCAGTCAAGCACCAGCATTTCACAGTACATTCAGTGCACCGCGCGCATCGATGATCCCAGAACCAGCGAGC

>c36351\_g1\_i2\_len=1327

CCCTTAAATAACAATTTCAATTTAACCTTCATTGTGTTGTGTAATAAATGAGTTGCATTTATTTTATAACCGAATTTCAAGTAAAGCATTAAAT  
CGTATGATAAGCTTTAGTCTCTAAGATAGAGGCTCCATTTACCACCAATTAATAAGTTGACTTTAAGTTTTAATTAATTTCTTATCTTTAGTTGCT  
ATAAATATATAAATATTTCAAATACCCAGTTATAAGCATAAATATCCTATAGTAAGACTAAGTTTAAATAAGAGTCTGATAAATGACAAGA  
TTGACTCCACAAAATTCAGAAAACCAATTTACAGAGCAATAGATACGACTGCTAGTGAATTCAAAATGGCAGAAAATCAAGGATCTGAATGATGTCG  
GATGGAGATGAATGCATTTAGTGGCAGGGTCTCCGAAGACTCCTTCTTAACTGTTCTACGTAGTACATTTGGCTGAGTTGAATACCAAGGACTTG  
ATGTTCTCGGATTTGTTAGGGAAAATTTCCGAAGGGGAAACAGCTGACCTCAAGACCTGACATTCAGAATGACGTGAGCAGCATGATGATCATTC  
TCTTCTTAAAGCAGAGGCAACAATGTGGAGAAAATGCTAACTAGAACCAATGAAACAGGGAAGACCAGAATTACTGCGCTCAGAACCATCTATAATC  
TTGCAAAATAGTGTGGGACGAGGAGGGAACACTGTAGTTACACTGTCAAGAGTTGCTGCAGTGTTCCTGTTGGTACTTTGACTATCCTTGCCAACG  
AACTGTAGCAGTCCAAAGGGCTGTAACACTTAGTGTGAATGATTTTGGGCAAACTTCCACGCTCAGATGCAAACTGTGATTTGCAGCGGCGAGTTT  
TCCGAGAGGCAACCAAGGAACAACAATAATGAAAGCTCTACTTCTATATTTAATCGAAGAGAATAAGCTCCTGAGCAACAACATCTGAGCTCAACGG  
ATGCTGACATTTAGCCAAAGTAATACCTTTGCGAGAGCGTCACTCGTTTCGAGTATAGTCCCTCAGAGCAATAGGTTCCAAGCCTGTCTAGCTT  
TGAGAATGTTAAATGATCAGAATCAGTTAGCTACAGAGATAGTTTTGCCATCTAACAATATTTGGACAACGATTTCCGCTCTGCTGATTTGTCATTTA  
TGGCTTAAATGATCTACAGCTTTGAATTTGGCTCCTCATTATCAGTCAAGACCAACCCTTTGTATTAGTAAAGATTTGAAATGACAAGTGATC  
AGTGTTTTAAAGTTTGCAAAATTAAGGAAATTTATTAAGAGTTGAAAATCAGTATGCTTTATTGTTTTTATTTTCCAA

>c36369\_g1\_i1\_len=1239

AAAGTTTGTGTTTGGCAACCACACACAAAGACAGCCCTTAAAGTAAACACATCTAATTTTAAACGAAGAAATGGCGATTTCTATAAGAGTAA  
GTTTGGTACTCATGTTGATGATGAGTTAGAGCGGAAAGGAGAGAAGTCACTGTATCGATAAGTGTCTTTTACGACTGCAGAAATGATCTGC  
TGAGTAATGGGATGAACAGTAGAGCAGTTGAGATGATATATGCAGCAGCGAGTTGTAATTTGAGAAGGCATGAAGACCTGGACTCAAAATTTCTA  
GACTGATGGATCCCATAGAGCAGATGCATGCATCAATGAATGTTTACTGAATGAATGCTAAGGCGGAATGAGAAATTTGAGTGAGAAGAAGGTA  
CTTTAGATTTAGTATTTAGGCATAGACTGATCACTGAGACAGAACCATTCCACAGAAAACAATTTGAAAATCGGAGGCTGATCATAAAGTCTATC  
CTGCAATAACGAACTCATGATGAAGCAGAGTATCTAGCCATGGGATACAGAGAAGAAACAATAGACCCGGAGTATTCAGTCAAGTGGTTA  
AGGATTTGATTGCTCAGAGTAAAACCAGAAGACATGAAGTCTTAAAGTTAGCTCACTCCCATACGGCTTTACAGGTCCTCATACTATTTACGGGT  
TGGCAAAATTTTATTTGATTATGTCACAACAATATGATGAACGAATTAAGTCAATGGGTTTAGCCAAGATACTAGGTGAGTTTACAACACTGG  
TGAGTGTGCTTACTTCTTGAAGACGCTTCAAGGCACATAAAGAAAAGTGTGGTTGAATCTAGAGCATCAGAGAAAGAAAAGAAATGTCATGC  
AATCAATGACAGCGGAGGATGACACAAGAACTTTGACACAGACTTTGACAGGACTTGGGACTGAAAGTCAAATGAGTCAAGTCAAAGTCTTCTTTA  
GATCAACACTAAAATCGGGCTCTTTAACCGCGCTTGGAGTGTGTTCTGAGGCTCAAACCTGGTCTGGAGTTGTGGAAAAGTCAACATTATAGAA  
ATGCAATCAGTGTAGTTATAAATCAGGAGTGAAGCTTGTGTTAGAGTAGCTGTTGTCCCTCAAATCACTCTTTCAACGCGCTTACTGTGATA  
ACACTAAGCCAATTTGAGAATTCAGCAACATTTGAAAATCTAGAATTAAGCGTGATCAGGAATAGGGTCCCATTGAGTGAGCTGCCG

>c36405\_g1\_i1\_len=2738

AAATTTGTTTAAACACAAAGACCAGCCCCACCATTTGAAAACAAAGAAAACAAACACATATTTAGTCTCACTTGTTTTCCAATAGTTTGGGTCTT  
TGTGTTTAAACAAATTTAGTATTTTTTACCCTTCTCTGCTACTGAACTTTTACTACATACAACCTCTGGTTACACATTTGATTAATCCTATGTA  
TAAAATGTAGACAACTGGTATGACTAGCAGAACCGCAATAACCAAGTAAAAGTACCTTAGGAAGCCAAAGTTCCCCAGGGTATGCTAGCAAAGAA  
GTCAGATCCTCTTCCAAGCAGGTTGGTTTGGTTTGAATTTTAAAGTGTGTTAATCAACTCTCCCTCACATCTATTTCCACAACATTACC  
AGAACAGCTAATAACGCATTTTCTTCTATTTCTGATACGAGAATGAAAGCTTAAATTTAGTCAAGGGTTAGCTGATGTCACTAATTTCTGATCC  
AGTATTTAAAGCAGATGGGCACTTGACAGTAACTGGGCTCCTTACTGAATTAGTATGATAAATCTACTTCTAATGTTGCTCTGACCAAAAT  
AGCACAGCCTCTCAATTTTCTTAAAGTGAAGCTCGCATGTTGCCCTAATAACTGTGTACGAGATCTTAACTTCACTCTTATCTTCACTGATGTA  
AGAAGCTTGTCTGTGTGATGACAGATAGACTCCTGAGGCATCTTCTGATACCCTGACATGGTCAGATTAAGGCAAAAGGTTATTTTCCA  
TTCTTCACTAGCATTTGCTGAATCGATTGACAAAAACGACATATATCCTGTGCAACAACATGAATGGAATTTGATGCAATCAAGCAAGATTTAGA  
TGCCCTCTCAGCCAAGGTTGGAGTTGCACATTGAACGCCCAAAATTTTACCAATTTATGGGTGATTTCTGTTAGAGCAGTCCACTATTGCAAGTTAG  
CATGTACTGACAGCTTTCTCAAAAACATTTGTCAGTGTGTTTATAAAGGCTTATAAAGGCTTATGACAGATAAATACCTGACTGTTCTAATGTTT  
AGTAGGCAAAAGTGTATCCAAGATCAATGTTTCTTCTACCCCATCTTGTGTTGACACAGTTATGTTCACTTTGACTTCCCAGAACCATTCAGA  
ACACCTAGAAACCTCATAAGATTTCTTTCCGGTGTTTTGAATCAATTTGTAAGTCAAGCTTGGCTAGCATAAAACAACCCCTTGCCCCA  
GAAACCTGTGACTCTTGTGCAACCATGAAACCTGCTTTATCTTATTCGCAAGTGGGACAGGACCCGGGCTTCCGGTCTTAACTTTTCAAAAT  
GTCATCTTGCATTTCCCGGCTTTCTGCATCTGAAAACATTTAGTAGCTTGAAATCTGCTGCTGTTAGTGAATAGAGCAGACTCTTTGAGCAGCTT  
TTGCTAATAGCAGTATGTTCAAGCTTTATAAATGAACTACATTTCCAGATTGATCATTAACATTTATGCAAGACTCCTCCCAAGAGAGATAG

AGGCACCTTCAATGATCGTATTAATAGCGCATTGATCTCCACCAGCGGTTGATGGTAAGCAACTCAACACTTTACTATCAACTGTTATCACATTTTC  
ACAGGTC AAGGCACATGGTATCAAGATCAAAATGACGCACAAGACTGACACTAAATGGCTTATTCATTTGTTCTAATCTCAACTAATTTTCCCTGTTTC  
ATCTGCAAAATTCGCTAAGCTTTTCTGCTCGCTTATCAGCCTGCAGTTATCATGTCACACACAATGAATAATATCAAATTTTATGTCTCTTCAACCT  
TAACTTGGCAGGGCTTAGTAAGACATAAAGAGCTAATTTTGGCATTCTATAAATAATGCACGCTAAAGGTATAACCAAGATTAGAGAATAATAGC  
CAGCACTAATATAACCAGTTTACAGCCTTGTAGCAATGAGGATTGGCAAACTTAGGTAACACAAAGTCACAATGCAAGGCTAAGCATGTGTGTGA  
ATCATAACACGAACTGATAAGACCGTTTTCCCTTTGCCATCGCTTCTGAAGAACATTACTCTAAAGTCAAGTCAATGTAAGAATTTCTGATGGCAA  
TACATAATCAAATCTGTTTCTGTTTCGCTTATCAGCCTGCAGTTATCATGTCACACACAATGAATAATATCAAATTTTATGTCTCTTCAACCT  
CAGAGATCTTCTCTGCAAGAACTTTACATCCACTACACTGTACTGATTCCTCTTCTCTAAGTGAATAGTGACATCCCAGTTAGCATGAGCAAC  
AGCATCAATTCCTACTTTTGTGATCCAATTTGCATGTATAGGTCAGAGCAATCTTCGCAGTATTTGCAAGAACAGTTTGCATTTGGCCATTTACC  
AAACACACTTTTCATATGCTTCATCTCTTTACATTTGATGACAATCTCTAGGACAGCCACCGCTCGCAATTTGAAGAAGCATAGATTTGCACATCTTG  
TCCATGAGCAACTAGAACATTCCTGTTCCGTTGAATAGCCATTTCCCTCAATAAAGATACATCGTGAATCTTTTCAGTTGACTTCACTGGCTTTTCA  
TTGCTTACCGTTAGTAACGTTTTTCCCTGGATAGAGCAGTAAGTTTGTAGACAACCTTTTTAATTCATCAGGCAGCTCGCTCAATGGAAACCTATT  
CCTGATTACGCTTAATCTAGATCTTCAATGTTGCTGACTCTCCAATTG

>c36406\_g1\_i1\_len=6400

AACACACACAAAGACGACGCATAAAAATAAGCAAAGTAAATTAATCAAGATGTCCACTTTACTCAATGATATTGTTATAGACTCCTTGTCCAGGAA  
TTCAGGGGATGTTGCTACTGGAGATGAAATTTCTTACCAGGATAGTGTTCAGGATTTCCATTTCCAGAAGTTCTGGTTGATGTACGTGGTACT  
TAACTCGGATTTTCAATTCAGACCTGGATGATGATGATGTTGTTTCTACGCTCGGTAGTAGCGTTTATGGTCAAAGCTGATTTATAAATTTGGGTG  
TATTTGAAGCTGAAACAATCTTGTGCATGATTTTACCTTTGGAGAACTAATTTGAGAACACTGATAGGAAGTTAAGTGAGATTTTCCAAGAGGTT  
CAGAGATCACTCGATTTTACTCCAGATCATGTTAGTGAAGAACAGATTTCAACAATAATTTGTTGAAGGGGGCACAAATCAAGGGAGTTTGTAGATCAG  
TAAAAAATATTACGAAGAAAAGAAACAGAAATATGATGCTTTGTTGAGAACCATTTCATCAAAGTGAAGTGCACAAATGAAGGGAATGTAAGAAAGA  
TCCATTTCCGGATCATCAATTTGTTGACATGAAGCAGTGGCTACAACCTTAGCTCTTTCAAAGGCAAGTAATTTAGCTGAGATTTAGATTTAGAA  
TAGGTCATAAGAAATCAAAGAAATTTGGCGGAGTTAGGCTTGGTTGCTAACTACCAGAAGATGCAACTGAAATAGATAAGAGATGAGCAATATT  
TCCGTAAACTTTGATTTTACTCGAGATAAGGAAATAGAGAACTGGATAAATAAATAAATAAAGCGGCAAAATAGACATTAACAACCTGATAAAGATTTTC  
TTGAGCTACCTTAATGAGGTGGGATGAAGATAGAATAAGAGAGCTTATAAACCATCCAGATAAGGAAGCAGCTGGCATTAAACTGCGAAATTC  
TTCAGGAATTCCTGAGTTTTGTTGCGAACAACCAACAAGATATGAGTTTACGCAAGAGGCTAGAAGAGTTAAGAGCCAGTCTGCACATGCTGATT  
TTGAGAAAGAGTACATATCAAGAAATGAGGGAAATATGTTTACAGCAGAGAGGACTTCAATTAACCTTTCCAATGATTTTATTAACCACTGTAGC  
TTTCCAGGTTACCCAGTACAGGATTAAGGCTTAGCGAAGCAAAAATTTGAGACTGTCTATGATACTCTATATTTATGCGGGAATCCTGAAAGCAGTGG  
CTGATCCCTTGTACTTCCCTGATCATGAAGCTGACATATTAGAGCAGTACAATGGGAACTCCGCTATTGACAAGCAAAGAGGAATTCAGCAGT  
TTAAAGATGAAATTTTACCAACGCTTTTCCAATTTGGTGGGACCTTTAGCCTTAAACAACATATCTAGTAGTTTCTGGATTGAGCGCTATCACTTG  
TAACTAGTGTGTGAATAAGCAGCTGAACTGGCGAAAGACTTTAAAGGTTAAACCTCTAGATTTAACGCTTATTTGACTGACGCAAAATAGGTTCCG  
ATTTAGCTCTAAAGGTTGTCAGGTTAAGGATTAACATCAAAGTCAAAAGTCAATAAAGCAAGATAAATGTATCATCAATGCAATTTGAGTGAAGCC  
GAGAAAGCAAACCCAGATTGGTTCCACATAACAGACCAACACTGATGACATGGATCTATTAATGAGTGACTGAGCTGTTTATGGAAGTCAAT  
CTACTCTTTCATGAGACAACATAAGCACAACCTTTATGGCAAAGTCTAATCAATCAAGCAAGAGACTATCATGGTGACAACCTACTTAAGGTTAAAAG  
AGGAACGACATCAAGCGTGGTTGTCAAACCTAACTTTTAAATTTGGTCAAACTAATCAAGCATAAGGACTGAAAGTGGACATTTAGCATAAAAC  
AAAACCTGCAAGAAAGTAACTTTCATATTTAAGAAAGTTGCAAGATTTGCAAGATTTCAATGCTCTGGTTACTTATAAACCCTAAAGAGGAAATATTTCT  
TTTTCAGCTTATTTTCAAGAGAGGACATTGATTATCTTTTGAAGCACAGTTTTTAAAGATTAACAAGCTGTTTGGAGGAGAGAATTACTTAT  
ACACAACCTTTATAGTTTAAACAGAAATCAAAGTTGCTAACTGGTGGTGTAGTTTACCTAGAATGATTTGGTTTATTTAGGTTTGGAGTAAATTTT  
CTAACATCGAACCTTACATGTAACAGAACATCAGAGATTTACCAGAAAGCCTCCGACTTCAATTTGGTTTTCAGAAGATGCAATGCCAATGTTGA  
TTCTTGAGCATAAATATTTGGTTGAGCTTTGAAACACAGAGGTTGAAAGAGATAACGAGAACAAGATACATGGTGTGGAAAGCTTAAACAGATGGC  
CAATTTGAACCCAAACCTTACAATAAGGCTAGTAAAGCAAGCATGGCAATGAGAAGCAGGTTAACAATTTATGGCTGTACAGAAAACATAAGACCTGT  
GCCACAGGTACACTGCTACACCGCTAGAGCAAGAAATGAGGATGTTACTGGTCAAGAACAACTGAAACTAGTAAACCACTGTTCTGGGAAGGAT  
TTGTTAAACCCCTACACAATTTCAAACATAACAGGTCAGCAGGTCATAAATTTTACTTATTTAGGTTACATAAAGATAAAGACGAGACAGC  
AAGCAAATAAAGCAAGTAACTTATGATAAATAATTTGACATTAAGTAACTGAACTGACCTTGAACCTGCTAAGATTTAGGCTTAAACCTTCCCT  
AGAAGCCTAGACCACATTTGCTTTGATTTGGATCTTCTCATTGATTTGGGAGGAACCTAAACCATAGAATAAATGAGTCATATCCTGAGTTTAACT  
ACAACCTTTTGAAGGAACCTGCATAACTTCAATGTTTTTGCCTCAGTTGAAGAAAGATTTTCAACATTAAGGCTTCTAGCACTTTAATGAGGAGC  
TGTATGATAGGAAGAAAGTTAGCAGCAAAATACCAAGAGGTAAGGTCATTGAGAAGCTAGCACTAGAAGGAGAGGGAGCAACAAGCATGCTGAGT  
TATTTGAGAAAATAACTTAAACGCTTTGAAAGTCAAGAGGTTTAAAGATTTGATAAATAATAGAAAACCTAAACCTGATGACAAAACCTTACAATGCA  
TGTTTGTATGGATACAAGGACTAAAACATTTAGATGGATACGAGCAGGGAGCCCTTATATTTAGGTTAACCACAGGAATGATGCAGGGAATCTTAC  
ATTTATACATCATCCCTGTATCATTGAGCCATAATATCCAGAGTAAAGGAAGTGGTTCAACAAGAGCAGCCATGCAATTCAGGAGACTTTGAAATATC  
CAAGGCCATTCAGCTTATAATGTTGTCATTTGCAGTCTTCCAGATGATCTTACTTTAGCCTTAGTGACCTTTAACAGGAGATGCAAGTATTTGCCA  
CAAAATCAGTATTTTGGCTACTGCAATTTGCAATTTGCAATTTGCAATTTGCAATTTGCAATTTGCAATTTGCAATTTGCAATTTGCAATTTGCAAT  
GCAATCATGATTTGAGTTCAACTCAAACCTCGAGTTGGATTCAATCATTACAAGCCTGATATAAAGGCAATATTTTTCAGGTTTCTAGTGTCTG  
AGCAAGAAATGTTGCTAATAGACAAGAAGGTTGAGTGTCTTTGACCAGCTATTTGGAAAATGGAGGACTAATACGTTGCTAATGGCTTAC  
AACTTTGGCCAAAGCTACCTACATATCATCTGATGGGCTCACACAACAAGTACTTCAGAACATATGAAGTTCTGCAAACTATTTCCACAGATC  
CTAGCATTTGTTTTTGTGTCATGGATAACCAATGTGCCCTGATTTAAGTATGGATTATGGAACCTTTGGTGAAGTCTTCCCACTAG  
GGAACTGTATAAACATAAATTAAGACCCATAACCTAACAGATGCTAACTAGAAGAGAAATGCAAGCTTTCAATGAAATTAAGCGCACATGGTT  
CCCTATCAGCATATACAATTTGATACATGGGAATGAGGAAAGTGGTTAGCTTTGCTGGAGAGGATGAATGTTGACCAAGAAATGGCGAGAAAAA  
TACAGATGAAATCCAGAAATATTAATTCAGGAGGGCCCTAAATCCAGAGGAGGTTTCGAGTTAAGATTTACAGAAAATGCATCCCCAGGTTGTTCTG  
CTTCCCTAAGCAAAATTAACACAAATTTCCAGCATTCTTGTGAGGCGCATATGTTCCATAAAATGCAAGCTGTACATCATTTGAGTAACTGGATTG  
ATCCCAGGCGACTGAGTTTTCAAGGTTACATTAATAGAGGCTATTTTAAAGAAATGAAGGAAGTGTAGTGCAGATGACATAAATGAACAAG  
AGATGAGGATCCTATTTCCCTTCCATGAGGACTTCACTAGAAATCAACAACCTGCTAAGTGGTGTTCACGCTGTTCCAGATAGTGCAGTCAATTTAG  
AATATAAAGGAAGGTCACATCAGTTGAAATAGCCACAACAATAAGTATTAAGTCTTCCGGGAATCTTTGTTATCATCTTGGTTTGGATA  
ATAACACTGATATGACTCCTCGATTGAGTAAAGAACATCGAGACTACATATTTACACAGCATCAAGAAAGTGTGTTTCCCTGGATAAGGAAAGACA  
TAAACGAATCATTAGCAAATTCACCATTCAATGAGATGGTTGAAATGCTACTATGGCTCAATACCTTTTTCAGGAGGAGAAAGGATAGTGAGACTGC  
TAGGAACCTCAAATTTACTCAAAGCATGGTCATAGCAGATTTATTCAGTAGTTATTAACAACCTTATCATCTTCCCATAGACTAAATCTCGATAGAG  
TAGAACTAGAGAGCCAGTTGATTTAATCTCCACTGTAAGATCCAAGTTCCACTTAGCTAGCTCGCTGGGATCATATTTGACATCAATTAATA  
GAAATTTTTCATCTGCAAGAAACAGGCTCAATTTGTTGAAAGGAGCTGTTTAGGTCAAAGCAAAATGACGTTGTTGCTAATGTTGCTAAGTTGGG  
TCATTGATAAAGGCTGGAAGGAATCAAACCTGATGAGGCTTAAAGTATTAATGATATGAAAAGAAATAAGCATGGGACATTAGGTTTGTTTA  
CGACAAGACAGAGATATCACTGGCAGAAGATGGAAGTCCACGATATCATGGTTTTGGTGTGTGGGAAGGAATCATTTGACGCTATGACATAATGA  
TTAGGATTTAGGAACCGCATTAAATAGCCTGTAACAGTCCAGAATGTACAGGTAACACACCCACTAGCATCAGTTGAATCAATAGCTTTAGAAAAGT  
TCATTTGAAACATGGGCTGGGCTTCCATCTGATATCCATTTCCAGGAGTCCACTTGTCTTAAATGATAAAGGCTTAAATTTCCAACTTCCAGGGG  
TGCCAAATAAGTGGATGAAGGCTTCAATGTGAACATAGCCGAGTTTTATAAACTACAACCTAACCTTAGAGTGGACAGGGAGGACCTTAGATGCG

TTGCAAAATTACGAAAGAACAGGTCGAGGAGTAAATATCACAGTCCTGAGTCTGAGCCCTAAGATTCAACACTATGAATATATGGCAAAATATG  
AGAAAATAATGGGTAAGGGAACACTGGGAAACCCTGGCTCGAGAAATAAACCTCTAGCCAGTCTGCAGCAGTGGAGATCATACGGTCTTTCAATG  
ACACTCTAATGATGAGAAAGAAATTTAATTAGAGCTAACTCFCAAAGCTAAGCTGCAAAAGCCAGGGAATTTTCGTTTAGGAGAAAGATAGATCTAATAG  
ACTTAGCTTTTATATCAAAGAAGAGCAGGATGAACCTTTGGATGATTACATGCTATTCCAAATGCCGCTGGACCTTGGTGATTTAAACATAGTTG  
ATTTGCAAGAAGTAGGTGCATCTCCTGAAATTTGTTGAGTTGAAGACTTTGAGCTGAGGAATGT

>c38870\_g1\_i1\_len=246  
ATTCTCTTCTTAAGCAGAGTTAACAATATTGATAAAATGCTTGTGTCAGGACAAATGAACTGGCAAGTTGCGAATTACCAATTTGAAGCAGCTCTAC  
AATCTGTCCAATAGCGTGGGCCGGTGGAAATAACGTGATAACTCTATCAATAGTTGGCGGCAGTCTTCCCTATGGCAACTCTCTCCATATTAGCC  
ATAAATGGAACCTTCTAATGAAAGCACTACTCCTTTATTTGATTGAGGAGAAAT

>c125955\_g1\_i1\_len=320  
ATTGGTTCTCGTTATCTTATCAATGTTGTTTCTCTGCTTAGAAACAGAAATATCACTGTGCTCACATCGTTTTGTATATCAATTTGACTTCTCT  
TGCCTTAGCACCTCGTCGGAAAATTTCTCTAACGATTCGGAGTACATCCAGCCCCTGATACTCGAACTCAGATAATGTACGCCACTAAAGCGTTCA  
TTCTTGTCTAACATCAATAGATTGTTGATTTCCAGCCATCTTGTATTTTGTGGCCAAAGGGTTAATAGTTCTGTAAGTTGGTCTTTGAATTTTGA  
CTATCTCTAACTTATGATCAAGCAGATTAAGA

>c32973\_g1\_i1\_len=2402  
TTTTTTTCTAAAACCTTTAAAGTCTCCAGCTCTATATCTTCCATCCATGTCCTGTATGTGATAACCCACGTCCTCAACGTCGGAGTCTGACCCGG  
CAACCTCCTCACACCTTGGCTTTTTTACAGGGACTGTTGAAATGTCGGCCCTCATCGTGAACCCCTCTTATTCAACGAGATCAAGTTAGCAAGCGAG  
ACGGTAAATGATGTTACTGGTCCGCACTGCGATGGTTCTCTGGACAGACAGCTCGAAGAACAAATCTCTCTCGAGGAAATATTCCCTGCCGAACA  
AGAACACTTTTCAACCGGATCTCGCTTGGGTTTGGCGCTAGTTCCGCGCCAGAGGTACGCTGGTAATCTTGAAGGGTCCATCATAGTTCTTCCA  
GGAGCGATATCCTTTAAGAATATTGGTATTAAGCTGGTGAACACACTTCTCATACCTGGGATCACACTCGGATCGGAAATTTCCCAT  
CCACCATCGTCCGCTCAGGGGTAGTTAGGTACAGTGAACCCAACTGTTGTAGAATCTAAACTCAATGTCTTGGAGCAACTTCACTGTCTACG  
GCACCTGTAGTGGCAGAGACAATAACAAATATGCCAAATAGTGTGAAATCCCTGTTGCTCCATGACCACCTGTAATGCATAACGCGCGTTCCTG  
CCACTTGGATACGCTGTGTTGGTTCGACGCTTCCATTATGCACTCATTGAGCCAGTTCCAATCGTCAGCTTGAGCTCGCCGCATCATCTCAGCGA  
AATCCCTTCATGGACATAGTAAAGCAATTTGGACCTTAACATTTACAGGGGAGACATGAAATCATTAAAGAGGCTCCTCTGGCATCTAAACTCAA  
TGGGAAGCAGGGATATATTTCGGCGCTTCTGGACATTAAGTCTTGACCACTTAAACGCTTAAACGTTGAGTTGTTGGTCCCTTACAGTGCATCCCTGCG  
CCCTAGGAGTAGGCTCGATGTAATCCTCAAATGCTATCTTGGGATATCTGTATCACTCTTCCAGCTGTCTTTATATCTTCTTGGACATCTCA  
AATACTTTGCTGGTCTTGTAGTGGCACTTCGAATGTTTCTTCCATCGCTCTGATGCTCTAGCCTTCGAGGTTGAAATCCGATCTTTATGT  
ACACGCTGATGGCTGCCAAGGCACGCAAGAAATGTTGAAATCACATCTCTGCAACACGATTCCGTAATACATCTTCTGTCGGCGTGTATGTTAG  
CTATAAAACCTTCAACCTTACTTGCACCTTTTCTGTCCCGATATAAATCTGACATATCTTGTCCCTGCACGTTCCGTTGTGAGCTCCCTGCCTCATGT  
TCCCCTGATGGGCGTAAAGTGTATCTCTGACGACCTTTTCCACATAAATGGGAAGCCCATCACAGCGAACAGCAGCTTCAAGTACATGTTGA  
TAGTGTCAACCTCTTCATGGATGATTACGAGGAGGCTCACACCCCTGAAATGTGACGATTTGAAAACCTGCTTATCTCTCTGGACTCCTTTTAT  
TGTTCACAAATACCAACATACTTTGCCAACCAGTGTCAAGATCTCCGTGTAGATGCCTTTATCTCGACTGGCAGTCACTGGAACCAAGATCAAGT  
GGTTCCAGAGGCATACACATACCTCACCTTGTGACTGAGTGGGGCTTCTGGAAGTGCAGGCATGTAGCGCATTTTTGGATCCATCAGTCCGA  
GCAAAATCCGTAATTTGGACTGAATAGTCAATTTAGACTCGAGTCTCAAGTTACTAAGTACCTTGAGCTCCTTACAGTGGTGGGATCCAAACTCG  
GGTACATGATCGAAAGGTGAGGCATTAACGCTGTATGAGGTATTCGACACGCTGGTTATGGGGGACCTTGAATACTACCTCCTGGGTTGGCACAA  
GCTGTCTCGCAGGACGCTTCCCGAATCTTACTCGTGACTCTTCCAAGTACCGAGTGTGCGCCTGCACCTTCTGCCTCTTTGCCCTGAACA  
AAATGTCTATGGTCTTCTTGTATCCCTCATCTGGGGTGGCCATGTTCTCTFAAGAACCCAGTACCCCTCGAGTTTGAACCCCTCTCCCAACT  
GATGTGCATCATCTCTATCCAGGAAATGCAAGGGATGCCATGCTTTGCTGCTTTCGAGAAATCGACTGAAAGCGGATATTTTGTCTTATACCG  
CAATCATGCTCTGACAGGCGCTGGATCCTTTAGATTTCTAGCATTTCTCTGGACGGTCTTCAAGTTGCAACCCGGGATCCTTGAGAATATCAA  
TGGTGCCTTGATTAGCTGAAATGATCTTCTCCGCCAACGCTAAAAGGCCCTTCTTGTCAAATCCTCTTGGTTTTGCTAGTCAATTTGTTGATGAA  
AG

>c31623\_g1\_i1\_len=3076  
TGTCACTACTTATTGATAAATTTTCTTTAATGACGGTTTACATCTTATCCCTTTATAATAGTGTATTCTTAATAATGTAGAACGATGTTTTGA  
TATTATACCTTTGACTCGGTTTACTGTGATAAGCCGAAATTTCTGATAATGTGAGACTATATCTCTATATAAATTCATTAATAGTTAATTTAAATC  
ATTATGCCGTAATATAATATTAATATCATCGGAATATACTAAGATCTCTTTTACATCTATAGTTGTTTCTTCTTGTAACTCTAGTATATATTA  
GGTAATTAAGTCCATAAATGGATTCAACCATCCCTCTATTTCCACCTAATTTGACCATGACTATAGAATCCTTTATTTGATAATGATAACTATAATA  
TACATCTAGATTGGGAAGTAACTTGGTATATGACTAATTTCTGTATACCAAGTAATTTACTCATCTCATTTAATAATAGGATACATATTTTATA  
ATGATAGATTGATTGTGTTCCCTCAATATCAAGCATTAAGTAACTTTGTGTTTTAATAAACTTTGAGCCCGGTATGACTATGATCTTCTTTT  
TTCGTCATTTTCTATATTAATGAATTTGACCTTTAAAATAACCCACATATCATTTCACTTCTATTGCTATAAATAGATAATTCGTTTATATGTTAA  
GGTAGCACAAACCAATAGACGCCCTTCTTCTTCTGTTCCCTTTCTTCAATCAATCTGGTTGCTTTCTCTAGTAATAAAGGTTCACTTACTCT  
TTTAGTATTTACTATTTGCTAAAGACCTATTATCTACATATTTGAAGAAAATGATGACTTGGATATATTTCTCTTTTGTATATAGATAAATAATC  
AGATTACCATCAAAGGATTAATAAACAATACATCTTTTGAAGCAAGTCTTATCTTTTGCATTAATAATAGTGGATTTTATGATAAGTAAATA  
ATTTACCCCAAATCTATATTTTCAAAGAACTTAATGGTAAATTTGATAATCTAATTTCTTCTCTCTAATAATGCTAAAATAGTATTTCTCGT  
GTGTGCTTGCATATAGAGAATATTTGGTAATGTTTTATGTTTTCTATAAAAACCTCTATAAACATCTTTCTAAACATTAATGTAGCTCTATGTA  
AGCATCATATCAGTATTTCTTCTACTATGTACTCTTTTAAAGTATTTTTCACAACCTTTATCTTCAATGATCTACTATAATAAAGAAATTTATG  
TATAGCTGATAAATCAATTAATGAGGACCATCAATTTATTTAATTCAGATATAAATTTGTATAAAGATATTTTGAAGAAATATCTTTATACCTAG  
GTATGAACAGATAAATAAATCTATTTCAATCTTACTTAAGAAATCAATTCATATATCACTTTAATTAATGGCTCCCAATTTATAATAGCACTTTC  
TTTAAAATCTGACTTCATAAGGCATAAAGTTTCAAAGTTTTCATAAATTTAACTTTAACCTTATAGTTTATATCTCTATCTATTACTAAATTAAT  
TATCAAATGAAGGATAGGATTTAGATAAGTATATTCACCGGTGAAGATTAAGATTTTATATTTACCAAAATTTTCAACAGCACTTATTAATAATC  
AAAATGGGCATTAATCCATAAAAATAAAGTTTATCATTTGCTCAATCATTTGAAAATAGCCATCACTATTTTATTAATCGATTATCATGTACTTTCAA  
TAGAAAATTAACACCATTCTCAAACCTACTTCAAATGCTGAATTTGTGAATTAATAAATATCTATGTTAGGTTTATCTAATGGTTTCTTCTC  
TTTTATGATCATAATTCCTATATCTTCAAACCTACTTAAATTTAGAAGATCTAAATATGCTTTTACTACTGATATCTTGGTAATATTAGTTT  
TTCATGACTTTTACTAAGTATTAATCAATATTCATTAATGTTTCTGTCATTTAATAATGAGATTTTGTAGTCAATAGATTTGATATTAGGATC  
AGAACGATAAATCTGTAAGTAACTATTTGTAATGGTGTACTACTATAAATAAATTTACAAAATAAGTTAGTTCGCTTGTGCTTATCTATTGTTG  
ACAAAATTTCAAACATATCTTACATGCATAGTGACATCTTTTACATGACAAGGCTTATATTTTCAAAGTTTATATTTATGCTACCAGCTCTCAT  
TAAATAACTTTGAATTAATAATTCCTTAAATCAATCTCATTGGAATAAAGGACTATTTAATCGACTAGGTTTATGTAATTTATTTCTGATCGATA  
TTTATTTGTTTCAAAGGCTTAAATCAATTTAATGATTTAACTCAGTTATTAATTTATATTCAGCTATATGATTAGATACATCTATATATTT  
CTGAGTATAACAGCTTTTGGTATACTATAAATTAACCTCATTCGATTTCAATTTTATTTGTTGTAATAAATAAATAAATTTGTTATTTATATA  
CAATTTCTATTTGTTTCTGGTTCAAATAATTTTGGATATTTCTTTATCAAATATTTGCAGATTTCTTATTTGTATTAATCAGATTTCAATTTATCTTG  
ATTAGCATTCATTAATTTGAAAAAGAAATTTATTAATCTAAATTTAGTTATCTTTAATTTATGTAATACCTAAATATAAATTTCTTAATGCTCT  
CAATAGTTTCTCATCTCTATCTTTGCAATTAATTTGATAATCTTTTATTTAATGATTTGAATTCATATAAATTTATTTATATAAATTTAAGAG  
TTCCTTTGATTCATTTGCAAGTTTAAATTTAATTTAATTTAATTTAATTTAATTTAATTTAATTTAATTTAATTTAATTTAATTTAATTTAATTTA  
TAAATTTCTAATAAATATGATAAATTTATATAGTATTAATTTAATAAATAAATTTAATTTAATTTAATTTAATTTAATTTAATTTAATTTAATTTA

TTAATATTTTTTAACATTAATGAACCATGTATTGTAAGTTTATAGTCTAGTTGTTTTATTTTTCTATTCCTTTTTATCTTTTGCCTTTATGAGTTT  
TATG

>c12670\_g1\_i1\_len=1492

AATAAGTAGTATGACAGATAAATTACTTTGTAAATGATGAGATTGACAGCATAGCAATAGATTCTTCAACTAGCTCAGCATTAGAAGAGACCAATAA  
AATAAAGACTATATATTTTATAAAATCTTTAAATTTGATAGAAATTAATATTTATAGTTTTTTGTTATTTTTAAAGACAGAAAAAGAAATTAATAT  
ATTGAGACCTTACTATCCAGATGATTTAATGACATTAGTAAATGAAGAAATTTTATCTTAGAAAATATTCACAATGAAAATTTCTTGAGAGAAAC  
ACTAACATATATGCAAACTAGATTTCATATATCAAAATAGATGAAATGTTTAAACCATCCCATCATATACATTTTCAGATTTGCTGATTTATTAAG  
ATCTATATCATCAAAATATGATAAATATGGTAGCATCTACTTATCGTTAAGCTTGCCTAGTCAACTTGGTGGTTAATAATAAGTACATTATCTTC  
AGTACTCTTAAACGGACATTCATCTAGTTTTATAAGAAGATTAGATGATATATTGTTTATGCTTAAATATACAGACATTAGCTTCGATGAAAAGAAC  
CTTATTTATGAACATAAATTCGGTAATATAACTAAAGAAAATTAACATAATATAGATGACGAAAATAGAGTCATAAAATCTGAAATCTCAATATTT  
TACTGATTATGATCATGCTTTAAATATATTTAAAGACAACATTTTTAAACAAGTTAAAAACTAAAAGTGAAATTTAGAATTTAATAAATACCTAGG  
TACAAAAGATAGTAGCAAAAATATTTAAAGGAATGTTTACAATTGACAAGAGAAAATTTTTACATCGTATTACTAATTATATATAGAACACTC  
TATATTTATGATAGGTGATATGTTATACAATAAAATAGATAAATCAAGAAGTTTTATTAAGAAAATGAAAATATATATGTTATGTTTATAAAT  
ATTTAGTAAACAATATAGTTAGCCATTATAGATTTATTAATGTACAAGTTTCGTCAAGATTTAAAATATGAAAATCGAATCTTTAAAGATATG  
AGATGTACAACTGTATTTGACAATTTACTAATGAATAAGTATCCAAATATTAATTTCAATAATATTAAGGAACCATTTATTAATAATAGGCTTAG  
AGATTATAAAATAGAAAATAACTTATTTACTATTAAGAAAGTAAGTTCTACAATATGGA AAAATGATATGAAGGTATTTAAGACTATGAATATCCC  
TTTAGGATTAAGAAATAAAATATTCGTGCAAGAAATAGTCAATAACAAGTAAATATAGAGAATAGATTAGTATTAATAATAGTTGTTATATACTAA  
GTGATATTTACAAAATGATGAAGTTTTTTATCAGGAAGTAAATAATTTGTTTAAATATGTAATTTGACTATTAGTTCAATGACTAAATTTAATA  
TAATGAACCTTATGGATTACTTAACTATACCAATAGGTGGTGAATATTTTCAT

>c35704\_g1\_i1\_len=7947

AAAAAATAAAAAATAAGAAATATTCGTAGACTAATAACAGTAAATATAGATCAACTGTATATACTAAAAATTTTAAAAAATTTTAGTAAATAA  
ATATTCATTAATTTATTGATTTATATCTTTATAAATATTATAGTTTTTTTAAATAAATAAATTAATGAATTTATAATAACATAAAATCTAATTTATAAAT  
AATATTTTCATAATTTATTATAATACTATCTCAATAATCTACTTCCGCAACATTATGACTATTAATTTATATATTAATAGGTATATTATGAT  
AAAATATAAAAATAAACATTTACATTAATCTTTCATCATCTCTACATATTTGATCCAAATGGTTCATCATCACTATAATCAATTTGGTTCAGTATTTTCC  
ATTACTGACATTTGCTTTGCTTAAAATTTTTTAGTTGATTGACTATTCCTGCAGTTACTTTATTCGGTATTTAATTAATCGGTAATCTCAATTTGTA  
CCATCATTTGTTTAAAACATTTACGTTCTTCTGAAAATGCATTAACATTTGATGTAATTAATAAATTTACCAATACCATTGACTGCTCATCTTCCAGGA  
TCTGGAGTCTCAATATTTTCTTCTCTGTTTTAATGATGCAATTTATTAATTTTTGCTTTTCAATTAATCTTTCATATATTTTCAGATATT  
TTTTAATAATTTGTTCAATTTTGGATTGAATAATCTTTTTGCTTTTCTATTTAAATTTACTAGAGAACCCTTATTAATTTAATAAATCTTAAAAATTTT  
GCTCTATAAATGCTCTTTGAGATAATAATTTATAAATGAAATTAATTTCACTCAGAACATCATATACGAGCTAACAAAAGCACACTGTAGTATT  
AATTTATATTTCTCATATCTTGAAGCAGACATGATCTTCTGATAAATTTTCTTCTCATCATGATTTAATGAACTATGATTTAATGAACTATGATTT  
AATGCTTAAATATTTTGTAGGCAATACTCCAATAAACATTTCTTGAACCTATTTCATTAATTCAGTTAATAATGGGTATTTACAAAATTTGAATA  
AATTTGATCTAATTTATCTAATTTTAACTCCCTTAATTTACATATCTTACAATTTGCATTCATTTAATAAAAACAGAAAATACTTTTCTTTAGTT  
TTATCTTCTAATAATAAACTCATATGAACAACCATATCTATATATGTAATAATCTTCAATCCATATATGTTGATCTTCAAAACATTTCCATAATC  
AATTTATTTATAGTTGGTATTTAGTTTAAATTTTCTGCAAAAAGTTAATTAATTAATTAATTAATTAATTAATTAATTAATTAATTAATTAATTAAT  
ATATTTATTTAATACTATTAATTTCTATTTCTTCTAAAGATATTTTAGAATTTACTGAATTTGTAACCTTTCATAAACCATTTTTCGCTTTATCAAT  
TTATAAAATGACTTCATAGTAAAAAAGTGATTTATTTACTAATCTTTGATTTCTTATATTTAGAACTGGCATCATCTTATAGATTTTGTATAAT  
CTTATATAGATATGGTAAGGTTGTAACCTGATTTAGTAGGTTATAGAAAATTCATTTTCAGTAAATCCCTTCAATTTATTTATTTATTTCTATTAAT  
ACTTTTATCTAAAACGTTTATGCTTTAATATTACTATCTATCTTCTGCTAATGATTTAATTAATTAATTAATTAATTAATTAATTAATTAATTAAT  
ATAAAAGATATATCTAATAAATAATATCATACATCTCTGTAAGCTTAAACGTTTTCATAAGATAAAAATATCATAAATCTCTGTAATTTATCCCTCT  
ATCTTAAATATATCTGATAAAAACCTCCTTATATTAATACTTGTGCAATTCATATTTAATTTCTTAAAAGCTAAAATGGCCATCTCCCTGCCAGCA  
GTCAAGTTACATATTTGATTTATTTATAAATTTTATTTAATTTTACATTTTCTTAAATTTGCAGTTATACTATCAGATCTCTGTTAATGAATAA  
AAAGACTCTATTTAGAAATTAAGTATTTAGCTTTTGGCTTAAATCTTAACTTATCATCTTATATATACATAGCATATTTCTTCAACAGAAATGATCTATA  
GGGTACCTAATATATTTCTATAGAATTTCACTAACTCATTTGGTATCATATCTTCATTAATAAATTTTATCTATCTTAAATTTTATAATTTCTGCTATCA  
TCCCTATAATTTTTCATGATATATACCATTCTTCTACAATTTTAGATCTAATATAAATCAATTTCTTTTTCTATAAAAATTTCTTAAATTCATGAAC  
CCAATTTATTTTCAAAATATAAATAGTATCATTTACTAATTTGATCATTTCCACCATTTCAAAAATGCTCTCAATAATCTAATTTGCTTATCTATC  
ATTTATTTAATTTCCGAATTTGCTCTTTGATCAAAAACATAGGCAAAAATTTTATTTATTTTCAATAATCTAATACTTGTTTTCAATTTTCAATTT  
GAATATTTCTGTTGATCCTAAAATGCTGCTAATTTCTCGTGTATATAGCCTTCTTTTTGGTTTATCATTAACCTTATCTAATTTACTTAATTTGTTTA  
TTTTTAGATTGCTCTTATAGATTTCTATCTTTTTGGTATTTGTTTTCAATAATCTAATACTTGTTTTCAATTTCTTTTCAATTTACTTGTATCTTCTGTT  
GAACCTAAATTTAATTTCAAAAGATGGATTTCCATATTAACATCTCAATTTCTTAAATTTTATAAATAATCTTATAGTAAATTTGATTTGCTTTCT  
TCAATGAATTCATTAATAAATCAAACTATAAATTAATTTACTGTAATTTAATTTGATGTTTCAAAAGCTTTCTTCCAACTTCTTCCAACTTCTTATGATATATG  
AAATCTAACCAAACTGATTTTGGTAAATTTATATATACATTAATTTACATCTTTAGTGAATCGTCTATATAAATAATCTTCAGTTGTTTCTTTT  
AATCTAATCAATCTCATTTATTTGATAGTATTTTATTTATTTGATAGAAATTTGTTCCATAGACTCAATTTCTATATATGCTCATAAGAAATCCCTTCA  
TATTTAAAGTTACTTATATAAAGTTGATTTATATGACAGTTTAAATTTCAACATTTTTCATATTTTGA AAAATGCTTAAAAGAAATATTTCTTTCAAT  
ATTTACTTTTATTAAGTAAATTTCTATCTATAACGGCTCTTAACTGATCATATTTTAAACAAAATGAAAAGTTTATATATCTTAACTATCAGTAAATTT  
TTTTATAATACCAGTCTGAGTCAAAATGCAAGTGTAAAGTAACTAATAAATGATGTAATGATTTTATAAATCTTATTTTTAAAAGCAAAAATATATCC  
AATCTATGAAATATTTCCACCCTATTGGAATTTGATGATAATCCATTAATTTCAACATATTTAAAAGTAGTCATTGACGATATGGTAAATCACAT  
AATTTTATAAATATTTATTTGCAATCATAATGTAATTTCAATTTTGAAGAATCCATTTTGTATATAACAATTTTAAAACATTAATCTGTTTTCAT  
ATATTTACTTGTCTTATAAATAATTTCTTCTGTAGCATATTTTATTTCTCAAACCTATAGGTACATTTATATACCTCTATATATATCTTTCT  
CATATAGTTGGATTTACTCTCTTTAACTTGAATAAAGGATTTCTCTATATTTGTAATCTCTTAACTTGTATTTATAAATAGGTTCTTTGATTTCAATG  
AAAGTTACTTTATAATATTTCTTTGCTAAAATATTTAATAATCTGCTGTATATCACACATATCTAATATTAACCTTCTATCAATTTTATATTA  
TCTTTCTTGGTATTTATTTGAATAATCTATAATGACTAACTATTTATAACTAAATAATTTATAAAAATAAACTATAAATGTAATTTTAAATTTCTTT  
ACGAAAGTTCTAGAAATTTCTAATTTTATTTATAAATCAATGCTCCAACTCATGAATATTTGAATGTTCTATATAAATAAATTTAGTTATCTCTATGAGAGAAA  
TTTTTCTAGTTAATTTCCATACATTTCAATTTAAAATAAATTTGCTTACTTTTTCTAGTACTTAAAGTATTTATTTGAATTTCAAAATTAACACTCTTATTT  
CTTAAATTTAGTTAGAATATTTACTTTAATAACAGTACTTGTGTTATCATAGACACTCATGATAGGATATTTCAATTTGTTATTAATCTAGTTTCTTCT  
TCAATTTCCATATACATATCACTATTTATATACCGAATAAGATATGAAGAAATAGTATTTCTATCAATTTTAAATTTCAATATGTTTAAACATA  
TAAATTTATATCTAATTTCTTATGAACTAGAAGAAATTTCCAGTCCAGTAAATTAATGATGATGATAAAGTACTAATAATTTATAAATCTTAAATTTGCTT  
GGTAAAGTTAAAGATAAATAAATGCAACCATCATTTGATTTATTTATAGCTATTTGATCTTATATAATCATGGTATCTATATTTGATTTGATGGGAA  
GGTTTAAATTAATTTCTAATCTATAATATGGATATCTGAAATTTCAATATATTTCAATGATTTGCTTAACTACTTCTTTATCATTTGCAATGTTGTAAT  
AAATAAATTTTCAATGATTTAAGGCCAACCAATTTCACTGGATATAAACTTCTCAGAGCAGTTCTACTCTTTTCTGTATATAAATAAATAAATAA  
CCATATAAGTTAATTTCTGTTAATTTAAAGAAATTTTATGAAATTTAATTTGCTTAAATTTTATTTGCTTTTAAAGCGGAATTTAGTACTGAAATCTC  
ACTGATGTACTATCTATTTTCATCATTAACAAAATAAATTTCTGTCTACTACTTATTTGATAAATCTTCTTTAAAGAAAGGCTCACACGCTAGACCT  
TTATAAATAATGAATTTCTTAAATAGAGTGGATCTATTTTATAGATATTTACTCTGACTTGGTTTTACTGTAAATCCAAATTTTGTATAATGAGCTACT  
ACATCTCTATACAATTTCAATTTATAGTAACTGATTTAAATCAATTTATGCTTAAATTTATATTTATATCTCAGAATACTAATAATATCTTTTACA  
TCTATTTGATTTCTTTCTGTAACATTTTCTGATATATTTAAAGTTTATTAAGTCCATATTAAGTTAGCCATCTTTCGATACCACTAAATTTGACCA  
TGACTATAAAAATCTTTATTTTCAATAATTTAATAAATAAACAATCCAATTTGAAAATAAATACTAGCAATTTTACTATCTCTTTTATACCTAAT







GGACAACAACCTTCTCTGATATCGGCGTTTTCTCCAGCGCTCCTTTGCGGTCATCTGGCCAATGACGTAGTCTAACGCCTGATCTTGAAACCAAGATA  
AAATCGTGGGATGGAATCACCCCTGACTTGGTGGAGCCGTTCTGACGCGCTTAGCACCAATCGGGCCCCGCATTCACCAACCTTATGCTTCA  
ATGGCGCCAAACAGCGGACGCGCGCTGCTCAGCTGAACTTCCGGTACGCTTCCAAAGCGCTCATCCCCGACAACATCATCGCTCTCGGCAACTTG  
CCGTATCGTGTGCTCAGGCTTCGGAATGGACTGAGCCCAATTCGGGCCATAACAACGCCATCTCTGACTTAACCACGGGTGTACCTTATCCA  
TGTCTCCAGAGCTAAGTCTGGTTAGCCACACCTCGAACAGCGGATTAGCCGTCTCACCCCTTTTCATCATCTCGTATTCGGCGTGAGTGGCGTGA  
CCGGC

>c914\_g1\_i1\_len=836

ATGGCAGTTCGACTACCATCCAATAATGTATGGCTCAACGGAAATCAGCTTCATCTCCGGTATCCTACTCGCCATATGTCGTGAGGAAACTCCACA  
GATGAGCTCAGAAACCGTGTGGAGCAAGGAGTTCGCGACGCCACCTCAGCTGCGTCTGTCAACCTCGGACCTGCAACCTTAAAGAGATTCTCCACG  
ATCTATTGCTCGCATATTGATGCCACCAAGCCGGACAACATTTCCGCTACGTTCCAAAGCGCTCATCCCCGACAACATCATCGCTCTCGGCAACTTG  
GTTATTCAAGCTGTGTTCTGGCCCTTACCACGTACATGGTCATTTTGGCGCCATGACCGATTTCCTCTGACTTCAACTGGGCACGGCTGATGAAC  
ATCGTAGGTCCAGAGTTCGGAAAGTTGGATCTGGCTGTCCAGCGGTAGCATTATTTCCGACTTAATCATCAATGGCCGACGATCTGCCAAGAA  
TTTCCCGAACTTGGCTTACGCAAGCTTCCAGCTTTGTATCAGAGCGGATGGTGAATCCACTTAGAAGATACGGAGGAATGCCAACAGTCAATCCC  
ATCGAAATTCATCGATCGATCAAGTCTCAGTGAATATCTCGAATTCGAAATTCGAAATTCGAAATTCGAAATTCGAAATTCGAAATTCGAAATTCGAA  
ATGGGCAGATTGGCTAACAGAGTACCGGAGCACACCAAGTTTAAATCGGAGGTGCTTAAAAAGACTCCGCGAGAGCCAGAGCAATGGCTCCATA  
TGACCTTAGGCGTAGGGTTACATACTACAGTACCAAGCAGTTTGTAGAACAGTCAATGACGCTACCA

>c15947\_g1\_i1\_len=1115

AAAGTAGATAAAGGCGCTAATGGAGACTAACTCACATTAGCACGCTTAAACCAACCGAATTTGTAAGTAGCATTATTAAGATCGGGATATACT  
GCCGTAGTAGCAGGAGAAGTGTGCACATCTTGGAAATGCAACCCAGTTTACGTAAACACCTCGATCTGATGATACTTGTATCAAGAAATACCTGTA  
AATATATAAATAACAACTATGTTCAATGGCCCAAGTAACTCATATTTTACAAAAAGAGGATACGCAAAATGATTCGCACACCTTCTACCGACAAA  
TTTCAAATAGTTGGAAGATGGTATACAACTGATGGTCTCAGAGAAGCCATCAGCGTTGAAACTCACACCTTCAACCTTCAACCTTGGTCTCA  
TATACACATCTACCAAACTTAAATGCAAGCGGAGTATATGATGCTGATAGCGGTAGAGAAAAATGAGAAAAATGATTTACGAGCAAGGAGATAGACGA  
GTTGCATCGAATGTGTTGCACAAAATATTAATTGGACAACACCTGAATTTCAAGGCTTCCGTTTCAAGCACTAGTTTCAATAAAGTAATCGAA  
AGCATAATAGAAAAATATTTGGAATTAAGCTAATGTGATGGTCAACCCGTTTGGGCAATATAACCTCAACATTTATAGGATTTGATGATTTGGTAGA  
ATCATTAATTTCTGATGATACCAATAATGCATGGACGCATATTTGACGACATATACGGTCTAGGATGGCAACTACTTGCCTCATTTCTGGGATTCT  
TTGACTAACTTTCTGCTCTACAGAAACGCTATGAAAAGAACAGCCGGACAGAAAAATTTTACAACCCGAAAAACAAGAGGATGAAGTACTTCAA  
GTAGATGAAGAAGAGATTTTACTCAAATCGCACGTCACACCCAACTCCATATCTCGCGACTAGTACCCAGGTATGAGTAAATCTAGATCGATTT  
ACGGGCTCCGGAAATATCGCCGCGAGTAAATTAATCAACAAGAAAAATAACCCAGCCATAGAAACCAAAATTTCCGACAGCCCATCGAAGCATAGTCC  
ATGTCGATACCAAAATGAGAAAAATGAAATAAAAAGCAGAGCGCAAAACTAGGACCTCCG

>c35613\_g1\_i1\_len=2049

CTTGTGTTAGTGTGTCGAGCTCCAGCTAAGAGGTTGTCACCTCTTCGAAAATCTACCCTTATACACCTGTACCTTCCATTCTTCCAGACTTTGGGCGT  
GAGTTCTCTTGTCACTTCTCACCGAATATAGAAGTGCACACCTCAGCGAGTCTGGATTAAGGATTTCCCAACTCCCCAAGTCTATTAACCTT  
GAAAGGAAAAATGGAAGATTCCCTTATTTACAGTTCACCTCTCAGCGGAAAACGAAAAGAAAAACCGGAGAAGAACACCGGCGTCGACCGTCAAAAAC  
CTTCGCGAGTAATAAGTAAACCGTCTGCACAGGTCGGACTTCGACTTAGACAATCGCGCTTATACTGCAGTGAGAATGAGCTAATCGAGGGCTGT  
GAACAATTCATGGCCCTATGGTCACTGGTATACTTACTGGCATGCTCGCATTTCTGCTGACTGCATATATATGGAGGAAATGGCTTTCATCAGCT  
ATCACATCCGGGTGGGCAAAAATCCAAAGTAGGTACTATAGAAGGAGGTTTAGGAACAGAGAAAAAACTGACAGAATAGCTATGAGGTTGAGAC  
ACATGAGGGCACCATCTCTAACTATCATGGCCATCTTACTTTTCACTTTTTCGACGCGATTAGGATGTGACAATAACATTTGATTTGGTTCCAAAAG  
GAGTAATCTGCGACAACACACTGCATTGAGTCCAGCATGTTTCGACCTAACAAATAGAAACAGGATCCACATTTGTGCTTCCAGAGATCAAAAAGGTG  
ACCTGATACATATTATCTACGACAACATCATATAGGGTTGTGCGAAGCATGCTTATTTACCACACTTCGGACTATGAACTGAGCACTGAGCAGCTCT  
GGCAATGCAAAAGGTGCAGGCATTTGCTGGAAAGGTTGGTTCACCAGTACTCCATGCATCCCAGCCTTAAAGAAACCCCAAGCAGGGCTTATTG  
CAAGATACCGGTGGCAATGAGCTTAACTGGCTGTGACACATACCTGTCAATTTAGGGGTGCTTGTGATATATAGATGGCAGGTTGACCCAAATG  
GTGCACCAGTCCCGGTATACAAGGACGTAACAAAATCTGGGGCTGGATCTTACAGTAACTTATGGAATCAGACTAGAGTGTACCAAGTGAATG  
TCAACAATCCCAAAATTTAACTTGGAGAAGTGGACAAAACCGCATTTCCCATGTTAGTAAACAGGGTTCAAGGCCAAAGAGGATGACAAATGAAAAAT  
TCTACATAGTCGAAAATGGGAAAGTGTACAACGTTGATGCTTCTAGACAAAACATGCCAGAATGGGGTAACTTGGTACTATCAATTAGATACTA  
GAAACAACACTGGCAATGGAACACACAAGATGTGACACACACTGTCATGTCAGGAGTGTGTCATGCCAGAACCAAAATGAGAAGGTT  
CCTACATGGCAACAATCATGTTGACAGCATTCAGTCAAAATTCGTCGGGAGCAATGCTATAATGCTAACACAACAGAGGTAATGATATAGCCAA  
GTTGTTAATAGGCAATGTTGAGATCAATTTCTGAGAGTTGCACCTGCCAAGTGTGCACTAGATGTTATTGGTACATTTTCATGACGCGGCTGTGC  
AGTCAAGCCATACATCATAGTACAAGCATCTGAAATATCTGAGCCTGGACTAGTCCCGTTACCTCAAACCTGCACATTTAGCACTTCGAGCATTTG  
CTGTTGATGGAACCAATGAACTTGAATTAATGACATGAATAACAATTTGTAATAATTTTCCCAAGTCTTAACAGAAGTATCACAGTAGAAAT  
GAAATACAATTTATCTAGGCCAGCTTGTATCAACCCAGGGAGATTGTGTCAGTGGAAATAGATGTGATGATGATTTGTATAGCTTGACCATGAACC  
AAAATACTGGAACCTTATGCTTTGTTTACTTCGACGATATCGTCTGGTAAACGGAGACATTTGAGCATCAGTCCAGCTACTTCAATGAAACTGCT  
CGCAGACTAAACAGAGCCAACTTACAATAAAT

>c35946\_g1\_i1\_len=2434

AACACCTCCTTTCAACAAAACATCGAAATGGCAGAACAGATCCTTTACGGAATCCCAAGTTCCTTCTATGCGGCGATCTTTGACCAACAGGAG  
AGGACTGACATCAAACTACCCGACCAGCGTGACATGGACACGTTAGGCATGGTTAGTGCCTTGTATTTGTATACGAACCCCTCCAAATGGCAGC  
GGCACTCCAGCACCAAAAGGTGGCGGAAACCGTATTGAGGGCCATCAACTTCAATCGGAAGCGGAAAGACAGGGAGGCTGTATAGACGGTTACGTG  
ATTGACAATCCAGTGTGGACAAAGCAGAACCGCTTCCCGTTTACGAGATATCCAGCAACTTCTGCCCGGGCAGCCTCCATAGAATGTGCTGTGCT  
TTCTGTCAAGAGAACTTCTGCGCCATACGGAAAACCGGCAGAGGACGTTGATAGGCAAGATGTGCGTTTTGAACTCGGATACGCTTACGAAGGTCGT  
CAACATGGGACGCTTTGAAAGAAAGAGTGTTCCTTGGCCCAAGCTTACATCAACGTCAACAAGCTATTCGAAGGACAACGGGTTACCCGACCAC  
CATACGGTTATGGAGCTCATTTCAAGGCTTCTTCCGCTTGATGAGCATGCCAGAAGTGGTAGGCCACGAAAGCTGAATACTACTACCCGAGAAGATG  
AAATACGTGGATGGACAGTTAATTTGCTACAAAGATAAGGAAGAAGAGGTTGTCAAGGTGACATGGAGGGGTGAGCAGGTTACCCGAAAAATCATG  
GATGAGGGCGACTTCTTCTGTTCTTACTTGAAGCAGGAGAAAGAGCTCATTTGAAATAGAAGAGCAATTTGCTTCAACGGGAATATTTCCAGAGGCA  
TTGTTTCTAGTGTGAAGAAATCCATCTTGTCTTTGGGCAAAAGTTATACGGGGAAGCAGATCTCCATAGGTGGGGAATGAAAGAAATGAAAGATC  
TCGTCGATCAACAGCGAATGTAAGGTGATCTGAATGACATGACATGAATAACAATTTGTAATAATTTTCCCAAGTCTTAACAGAAGTATCACAGTAGAAAT  
ATGTCATTCGGAATGCTCACTAAGACGCTCTTTGATAAGGAGGTCAGGTTTCGAGCAGAGATTGCTAATACCAACCCCATATGAAAGAACTCCCTCCGT  
GAAGTTGGCATGGCTTCGCACTGGCTCCTAGCAACGAAAATGATCACTCTAGGTGATGGGTGTCAGTGTCACTCTCACACTCATGGCAGTGTGTC  
CAGTTTGTGCTGCAAGGTTTCAACAACTCAACCCAACTCAGTCACTGGCTCAAGAGGGCATCCCCCTGCGTTATGGCAACAATTTACATCCGT  
CGCCTTGGCGGATGCTGATGGGTATGATGAATGCTTTTGTCTACACAGTACCGAATTTGGTCAATGTTGGGATGGAACAACCCGATGCTAGGCAACAT  
TACACTCTCAGGTCAAGCGACGACAGTATGACAATATACACTGGACCAGACATGGATGTGATCAAGACACTGGTAATTTGGAGAGAAGATTAATCTG  
AAGATGTGTTGGATTAATTTAAGCGACAAGAAAACCCAGTACTTCCGGCTTGGTGTAGGGGAATACACTTCTTGGTATCAAGATGGCGTGTGGTG  
AGTCAATATGGTGCAGAGGCCAGCGGATCCGACCAATGGGGATAAATCCCGCTGATGACTTTTACAATGTTGCAAGTCAACTTCTGTAAGCCTT  
ATGAACATCGAAAGCAATCACCTCGGAGCAGAAGCAAGATCCGATTTGAAATCGAATAATGTCAGGAGCTTGTCAAGCTGTGCAACAAGGGGAGAC  
GTGGAAGGAGGATACGGAAGAAATCAGAGTGTGCTGATGGAGGTTGCAACCCGTTGAAATAGCACCAATTTGTCATTTGGAAGAGACAGTCTC



AACCTTAACCTGTGGGGCTGAGTCAGAGGATTTTCAACTGGAACTATGGTAGCGGTGGTATCAAAGGATGTTGGTCTTAGTGAGGATGACACATA  
CCTTTTATCTGACTTGGTTGCAAGCGGGGAGAGGAAAGCCGTATATCAGCCTGCTATAGGTGGACAGCAGATAGTCGGAAGTTTGTATGTAATCT  
CGCCGACATCCCGATCAGTGGATCTGTTATGCGCACAGAGATGGCTCAGAGAGGTAFTGACACATGGCAAGTCTCCTCTAGCATGACATCTAC  
AACCGACCCACTATCTGGTGCTCATTTACCCCTGATAAGTGGGATGAGGATCTGTCCACCCGGAGGTCTGTCTCAGGTGACGACGAAAGAAGTAT  
GTCGCTGATAACCTGGAGGAGTGTGCATCTGCTGGGAGTATCGCATCACCGGCAAAGGCGACCTCCAAGGCCAACACAAGTCTGCTTGGCCAAAGA  
CAGTCCGAGGATGTCCAATACCTCCGTGAAGGACCTGAGATCCGGAGGCTACTGACCCGGGTGAAAAGAGAGAAATCCAGAGGCAGGTTATTGG  
GTGTTACAGGGCTTACAGTGGCTCTTTAGTCCGCTCAAGCCATTCAAGAGCAAGCAGACGAAAACCAGCGCATGTTTCAGATGGATACAGATATCCT  
AATGAGAATGATAAAGGAGGAAGTGGATATGATAAACGATTGCACTCGAGCTAGGCAGTATCTATGCCAAGTTTATGACGCCCTGCACGATCAGCG  
AATCCCGTATATGAAGAATATTGCCCTCCTACCGTGAAGACATGGCTATGAGATGTGATGTGCTTGGAGAATGCTCTCTGGGAGATCGTCACAGTCAG  
AGGGAATGGATCGGGGGTTCCTCATATCTGGAATAAGGTGCACTTGGGTGATATGATGCCAGATACTACCCCGCACATGCAGAGCTTATGAGGAG  
TGCAAACTACGTTGCGGACATCGATCAAGTTTGGAGGAATGTCAACAATATGGTCTATAAGTGAAATCAAAAATACAGGAACTATGCCACCAAGGA  
TGTCGAGACAATATACCACTGACAAAGGATGAGGTATTAAGTCCATTAAGAAGGCGACGAGAAGTCCCTGACTCCCTCAAGTCAATCCTCACCGC  
AGGAGTAGACAAGATCCAGCTCATAGCAGACAAGTTGTCTCAGGTTCCGCTCCCTAGAAAAGGAGACAGTCGAGAGCTTGGGGTGGACCGTCCG  
ATCCAGCGTCTGTGCCCATTAGACTCCGACCCTGTAACAAAAGTGAAGCTCCAGCTGCAAGGACGATCGAAGAGAACTCCGGAAGAAGAGGCTGA  
GTTGTTAGGGCTTACAGTGGATCGATCGGATCGGATCGGATCGGATCGGATCGGATCGGATCGGATCGGATCGGATCGGATCGGATCGGATCGGAT  
ATTTACACTTGTGTTTTATGCAATATTTCAGTTCTTCCAAAAAGAGCTCCAGAACAATTCGTCATGCTCAGCTTGATTACCTCGTGTGCTTGTG  
GCCATTGCTGCTACGGTAGTCACCTGCTTAACAGCATTGATTGCAATTCCAAATCAATAAATCTAACATCAATCTCTTTGGTTACAACCCCAAGT  
TGTGATGTCTCTATAAAGAACATACATACGAACAGATTAACTGCACTCAATCAACTGAGCGTATGAGCTCCCATTTTTTTCAGATGCCAT  
TTGATGTGAGTGTGATGAGGAGTGGATGAGTGGATGAGTGGATGAGTGGATGAGTGGATGAGTGGATGAGTGGATGAGTGGATGAGTGGATGAGTGGAT  
GAGTGTGAGCTAGTGCACAAGAAAAAGTCTTCCAGATCGTGAAGGAAGGTTCTTTCAGCGATATACAGCTAAGTCCGGATGGGCAAACTCCCTAT  
GCATACGTTAGTAGAGGCTATGTATCCCGGATGGATCTTGTACCCAGGTCGGGACCTTGTAAAGAAATGGAAGAGAATATGACAGGCCCTAATA  
AATACAGAGCTCACCATCAGATATCAACGGGAACGCTCTATGCTCTGTGTCGAAGAGAGTCAAGTCAAGTTCCCGAATGGAAGAGATGTAAGCTC  
CAGGAAGAGTCTTGTCTCGACGACTACGGGGATGTGTTCTGTGCTGCCAACCCCTCTGTGATGAATCTGAGTCTGAGTCTGAGTCTGAGTCTGAGTCT  
TATGAGGGTCCGGAAATGCTAGTAGCAGTGTAAATGGAAGTCCGACTGTCGAGTACATCCATGTCCACTATTCTGGCTACGACTTTCAAGTTT  
CTCCAATCTCGACAAGAGCTCATATGCGGGTACCGATCATCTACACGGAACCCCTAGGTTGTTGCTGACACTTCTCTGTGAATGGACCAAG  
TTTCTCTAAGAGGGCGGTAACCTGCGGTGGATGTCAGTTTGTCTCAATTTTGTAAATCTAAACTTGTGATTCATTCAGGCATATCAAGCAAG  
GTTAGTAGACTGTTCCGACTATTTAACCCAGGATAGGTGTCAATCGCATACAGAGTACCCAAAACCTCCTGTCTATGCTCCCTTCTATCCCCG  
GAATTCGCTTATACATAGGAGTCCGGACATACTGCCCTTCTCGAGGCGAGGTTATTACCTCGCTCAATGTGCTGCTGCTGCTGCTGCTGCTGCT  
GACCTCAATGTTACCGGATGTTATAACGAATGGCAGTTGTTTATAAAGCAAAATGTTTATGACACCTAGGAGTCGCATCCTTATAAAGCTT  
GGAACCCCGCTAAAGTGCCTGCCGACCTATTGCCAAAATACTATTTGAATGAAAATTTGGTATGTTAAAACAGACCAGGCTGATAGAAAACAAA  
AAGTACCGGACGACTATATCCCAATGGTCCGAAATGTTGCTTCCGACTCGACTTCAAGTGTAGATTTCTTAAGAGGAGGAACTCAACTCCCTCCGG  
TACCACTACACATCTGCCCTTCCCCCTTAGATTATGAGAGCATCAAATCGAAGGTGGGGGATTTCTGGGACCGCTTACAGAATCCGCGCTCCGT  
GCAGGGGGTGGTTTTGGTTTTGTCTTATGTTGTTGGAATATATAAGTTTTGCTTATATGTTGGTAAACCCATAATCAACTTCATGCATGTCAGG  
CAGCATGTAGGACACTCTGGGCAATCCCTATTTGTTCTGTTTCGATGATTTATGTAATTTGGTGTTCATGGGAGGATCTGGAAGGGCGAGCTCCA  
GCTGAGAGGCTGAGCTCGAAGAAATTTCCAAATGAGTGTGCTGCTGCTGCTGCTGCTGCTGCTGCTGCTGCTGCTGCTGCTGCTGCTGCTGCTGCT  
CTGATTTAATTTCTCGGGTGTGAGTCAAGATAATCACCTATCTACCTAAGCGTATATAGTGCATCTATGTGTAAGTTAACCTTTAGAAGTTTTATG  
ATAATAGGATCGGAAGTAAAGTGTGGGACCATTTAAAAACCCCGCAGTTACAAATCATGCTGTTTCAATAGCTTGTGCATTTGCCACTATCCC  
ATTGACTCCAGTCAAGTGTGCTCCAGTGTGTTGGGATAAATGCAAGATGTGTGGAAAACATCATACGTAATCAATGCCCTTCTTAGTAT  
GGGCGGCTAGCTCTCAACCAAGTTCATATTTCTATTTTCTCAAGTGTGCTCAAGCAATGCAACTAGCAAACTGCAAAATGCAAAATGCAAAATGCAAA  
TTATACATATTGTGACGCTCCATTTTTCATCGCTGTGAGGCTCCTTTTCTTTATTTATATCTGGCTAATTTTATTCAGTGTACTGGTTCTTTTGTCTTA  
TAAAAAACCCGCGAGTTACAGATCACTTATTTGTGATTTTGGAGCATAAAAATCGAAAATATGGCGAGCGAAGTGTGGTGTGCGAAGATGAGGAT  
TGGGAGATTAACCTGTAGGAGATGAGATATTTGGCAACGATGTCATTTACAGGAGGAAGCGACTGGTCAGAGCGGATGACGGCTGTATTTCT  
GGCCACTGGATCCCCATTTACGGAGAAGAAAGTGTGATGCTGCTGCTGCGAAGAGATAGAAAGGAGCTGTTATCGTACATAGGAAGTGGCGA  
GGCACATCGAACAGTGTACTTCAATTCGAGAACCTACTGACCCCATGGGAAGTCTGGAATCGTGGATTTATGGGGAGGCCATATCAAGTCAACT  
GTTGATATGAGGATCAAAATGATGATGCAAGGCGCTGTCACCTGGAAGATTCAAAAGACATCTTTCTTAAACCTTTGGAACATCTGGTCTCTTCA  
AAGGAACACTGGATCACTGTGACTCAGTTATAAGTAAAACTCAGGTCATCGATTAATAGTCTTAGAGCTGACTTAGAAAACATGATCAGGTTGGAG  
GCGATAAAGGATGCAATATGCTTCAAGGAGATAGAAATGGTCTTCTGATCAGAGATATGGCGGAAAATTTGAAAAGGAAATTTGTCATATGATGATG  
ATGAGAGGAAAGCTATACTTGTGGCCACAAACCTGCTCCTTTGTGCTTGGATAAGATGCAAGCAATGTTTCCGTGGAAGCTGAAGTGGCTCATA  
TCAGATATCCTAGAACGATATCCAGGGTTAAGTATCCTCAAAACCGGATTCGAAATACCTCGGAAAATTTCAAGAAAGTCCGAGATCAGACAGGAG  
GGGTACCATCTCTTCCGCGAGCATGGGAACCGCTGGTGGTGGGGGATACAATACGGCAGCCAGGAGATCAGGAAATCTGGCCCTGTACGTTCCAC  
CAGCTTCCAGTATGGAGGACACCTTAGGGTGAACAGTGCCTACTAGGATAGGAGACTTGTTCGCCCGAGCTGAGGGGAGGAGATGAGAGG  
AGAATGTTCTAGAGTTAACTGGAATAGCTAAGATGACGGGGTACCCATACTGAAAGCAGATAAGCTTCTGATCAGCTCAGGGAGCATGGAAC  
GGATACCTGAGACTATTGAGCCACAGTGTGATACAGTTGTTGCTATATGTCGGAGAGACTGGATGCTGAGTTACTTTAGAAAAGAGGGTGTG  
TATCCGAAGTTGGTATCTTATCCGGTCAATTCAGGGTTTTCATAGACAAGAACAAGGAACCCCAAGAGAAGTATATGACGATGTACGACTATGG  
GGCTGTAACTTCGGGAGGCTTAACTTCAATTAACGCCCCGATGATGCTGCTGCTGCTGCTGCTGCTGCTGCTGCTGCTGCTGCTGCTGCTGCTGCT  
TGGCCGAGCACCTTTGACAGGTGTGCGTTCAGTATTTGTACGATAAAGACCCACCCCGAAGTCCGAGGGTTAAGTACATCGCCGAGTAATAGAT  
GCCTTTATAACGGCTGAGCCTGACCTGCTCAAAAAGGAGATGAACAAGAGAGAGAAGGGGCAATGGATATGAAGGACAAGATAATCATCCAGTGT  
GGGAAGGAGCTGGAATGAAGGAGACACAGGGAGGGGCTTTACGAAACAGACTGCCACTCAAAGATACTTCAAGTCTCGTTAGAATCTAACACT  
GCAGACGGGATCTTCCCATATGATAGACGAACAGTCAATGACAGAGTGAAGCGGCTATTGCAAAACAACACATCTGCTCAGGTCAAGGCCATGGGA  
GGGACATCTGAGTTCGTCAGTTTATGATCTTACCAAGTGGTCTTGGAGCATAGGCAAGTCAATGATCCGTCCAATCGGAAAATGTACGACGAGATC  
TTTGGTCTCAACGGCATATATGAAAATAGTACCTCTTCTTTTGTGGTGTTCACCTTTTTCGCAACAACAGATTTCTCTCTCTCTGACTATGATAGT  
AAAGGCCCATACCTGGGCGTCTACTTGGAGGACTTCTGCGAGGGGTGTAAGGAATGCATCAGAAGAAGTGGACTCACTTCCATAGGGCTC  
ATAAAGCTTGCCTTAGAGAGGTGTAATAATGAAAGGCACAATCATGGGCCAAGGGGACAACAGGTCATCTCTGATTAACAGTATGGAGGATCTT  
CCCAATAAAGATGTAATGAGGGCTGCTTTTCTCGAACTTGGGAGACTTACTTTGAGGCGAGTTGGGCACAGGTTAAAGCTCAAGAGAGCTGGTAT  
TCAAGCAAGCTGCACGAATATGGGAAACAGCGGATTTACACCGGAATGTCTATTACCTAGCCACAAAGAAAGCAACCAAAATGATTCCTGATATA  
AATGACGGCTATTTCTCAATACCATCGTCTATATCAACATTAACACTACAAACAGAAATCTATCGCCAAAGGTAGCATAGACCCCGATGACGCTCT  
CTAATGAACCAAACTGCTGGTGGCAAAATTAACCTGTGCGAAGAAATTAACCTTTGATGCTATATGAACCCCGAAGTACGCTGCTGCTGCTGCTGCT  
CTGTTCCCTGCGGATTTTGGAGGCTTACCCTGTCAACTTACTCTCTCACGCTGTAAGGGGCCACGACGACCCGGTAACTACGTGGCTAGGGATA  
GCAATGACACTCAAGGAGCATTTCCAGCCCGGATACCGGACTGTGATGAACGCTGTGGAGGATGAGGCCAACTCCCTGCATCATCTGCTTTGGAG  
AGAACAAGGCTCTATGAGGATCCCTTTAGCCTAAAGCTAAGGAGCTCCGCTCAGCCGAAATCTGAGATACGTCAGCACACTCTCTCGTTCCCTCAAG  
TCCGACAGCTTACCAACCCCTGTATTAAGAAGCTGTACTCCACAGATGATTCGCTGACTACTCAGAGCTCATACGCATCTTGTATCCATGGAG  
CCATGCTACCCCGAGTTTGCAAATGCCATTTCTGAAAGATAGCAATGCCGGGATAGGGAAGATGCTCCAGGCAAGCTCACCACCTCAAAAACAAT  
GAGAAGCAACTCTATCTTACACCAGGTATCTCTCATTGATTTAATAAAGAGAAAAATGCAGAGCTGTGCGGAGAATTTGCTAGGAGGTTAAGC  
TCCAACAACCTTCTCAATGACCCCGGATATTTCTCTGTGATCTGCCCTATGAACTGGCAGAGAACTCAGGAAAGATAGCTGGGAAAGAAATTT  
ATAGGACTGTCCAAGGCCCTACTACCACAAGTTGTGCTCAAGGACATGCAAGCTGCCACAGGATGACAGGATGACAGGATAGATCTGATAGTTAAG  
CTGCTGACCAGGCTCGTGAAGGGCCCTTACTTCTTACCAGGCTTCCGACCTTACAACCATATGTGCGGAGCAGGACAAGGAGAGGTTGACC



TGTGATGTCTCTCATAAGAACATCACATACGAACAGATTAACATTGCAGTCACTCAATCAACTGAGCGTTATGAGCTCCCATTTTTTTCAGATGCCAT  
GTTGAATCTAGAAGTGTGATGGGCAGGTGCGGACGTACCCATTGATACCTTCCATAACGCGAGTCTCTTCTCGGAGATATCCGGCTTATAGGCAT  
GAGTTGTGACGTCAATGCACAAGAAAAAGTCTTCAGGATCGTGAAGGAAGTTCCCTTCAGCGATATACAGCTAAGCTCGGTAAGCTTCCGAT  
GCATACGTTAGTAGAGGCTATGTATCCCCGGATGGATCTTGTACCCAGGTGCGGACCTTGTAAAGAATGGAAGAGAATATGACAGGCCCTAATA  
AATACAGAGCTCACCATCAGGATATCAACGGGAACGTCTATCGTCTGTGCGAAGAGAGTCAAGTCCCGAATGGAAGAGTGTGAAGCTC  
CAGGAAGAGTCTTGTCTCGACGCAGACTACGGGGATGTGTTCTGGTCCGTCACCCCTCTGTGATGAATCTGAGTCCGAGAAGAGTCTCGTC  
TATGAGGGTCCGGGAATGATGATACCGCGATGTAATGGAACACTCGACTGTGCGAGTATCCATGTCACCTATTTCCAGTCTGCTCAAGTTTA  
CTCCAATCTCGACAAGAGCTCATATGCGGGTACCAGTATTCTACACGGAACCCCTAGGTTGTTCTGACACTTCTCTGTGAATGGACAAAAG  
TTTCTCTAAAGAGCGGGTAACGCGGTGGATGTCAGTTTGTCTCAATTTTGTAAATCTAAACTTGTGATTCATTCAGGATATCAAGCAAGAG  
GTTAGTAGACTGTTTCGACCTATTTAACCCAGGATAGGTGTCAATCGCATAACAGAGTCAACCCAAACCTCTGTCTATTTGCCCTTCTATCCCCCAG  
GAATTCGCCATATACATGAGGGTCCGGGACATACTGCCGTTTCTCGAGGCGAGGTTATTTACCTCGCTCAATGTCGTCCTGAGGCTGGCTGGATTTCC  
GACCTCAATGTTACCGGATGTTATAACGAATGCGAGTGTGTTATAATAACGAAACAATGTTTATGACACCTAGGAGTTCGCATCTTATAAACGTT  
GGAACCCCGCTAAAGTGCCTGCCGACCTATTGCCAAAATACTATTGAAAGAAAATTTGGTATGTTAAAACAGACCAGGTTGATAGAAAACAAA  
CCCCCTCAGACCATCGCACCTAACACCCCTAGCTTATGAGTTTAGAGAAGTCTCAGGAATATCTGGAGGAGGCTTTATAGGGCGGACATCATCCAA  
AAGTATCAGCATGATGATGATACCCCAATGTCGAAGCTGCATCTCGACTGAGTGTAGATTTCTTAAGAGGAGACCAACTCCCCCTCGGG  
TACCACTACACATCTGCCCTTCTCCCCCTTAGATTAGAGAGCATCAAATCGAAGGTGGGGGATTTCTGGGACCGCTTACAGAAATCCGCGCTCCGT  
GCAGGGGGTGGTTTGGTTTGTCTTATTGTGTTTGGAAATATAAAGTTTGGCTTATATGTTGTAACAACATAAATCAACTTCATGCATGTCAGG  
CAGGATGTAGGGACTCTGGGCAATCCCTATTTGTCTGTTCGATGATATGTAATTTGGTGTTCATGGGAGGATCTGGAAGGGCGAGCTCCCA  
CTGAGAGCGTTGAGTCTGAAGAAATTTCCAAATGAGTGTCTGCTGAGGAGTGCATCTAGCAAGACAATATAATAATATTACAGTA  
CTGATTTAATTTCTCGGGTGTGAGTCAAGATAAATCACTTATCTACCTAAGCGTATATAGTGCATCTATGTGTAAGTTAACTTTAGAAATTTATG  
ATAATAGGCATCGGAAGTAAGTGTGGGACCATTATAAAAACCCGCCAGTTACAAATCATGCCTGTTCAATAGCTTGTGCACATTGCCACTATCCC  
ATTGACATCCAGTCACTGAGTGTCTCCAGTGTATGTTGGGATAAACTGCAAGATGTGTGGAAAAACATCATACGTAATCAATGCCCTATTTAGAT  
AGGGGCTAGACTCTCAACCAAGTTTCAATTTCTATTTTGTCTCAAGCAACTAGCAACTAGCAACTATATATATCGATATATTTAGAAA  
TTATACATATTTGTCAGCTCCATTTTCTATCGCTGTGAGGCTCCTTTCTTTATTTATATCTGGCTAATTTTATTCAGTGTACTGGTTTCTTTGCTTA  
TAAAAACCCGCCAGTTACAGATCACTTATGTTGATTTTGGAGCATTAAAAATCGAAAATATGGCAGCGAAGTGTGGTGTGCGAAGATGAGGAT  
TGGGAGATTAACCTGTGAGGAGATGAGATATTTGGCAACAGATGTCATTTACAGGAGGACGCACTGGTTCAGAGGCGTATGACGGCTTGTATTTCT  
GGCCACCTGGCATCCCTATTTACGGAGAAGAAGTCGATATGCTGATGTCGTCGCAAGAAGATAGAAAGAGTGTATGATCTATAGGAAAGTGC  
GCGCATCGCAACAGCTTCACTTTCTTCCGAGAACTTACTGACCCCATGGGAAGTGGAAATCGTGGATTTAGGGAGGCGCATTAAGTCAACT  
GTTGATATGAGGATCAATGTATGATGCAAGGCGCTGTCACCTGGAAGATTCAAAAGACATCTTCTTAAACCTTTGGAACATCTGGTCTCTTCA  
AAGGAAACACTGGATCACTGTGACTCAGTTATAAGTAAAACTCAGGTCATCGATTAAATAGTCTTAGAGTGCATGAAAAACATGATCAGGGTGGAG  
CGGATAAAGGATCAATATGCTTCAAGGAGATAGAAATGGTGTCTTCTTCCATCCAGCATATGGGCGGAAAATTTGAAAGGGAATGTCCATAATCCCG  
ATGAGAGAAAGCTATACCTTTGTTGGCCACAAAACCTGCTCCTTTGTCGATTAAGATGCAAGCAATGTTTCCGTTGAAGCTGAAGTGCATGATG  
TCAGATATCTTAGAACGATATCCAGGTTAAGTATCCTCAAACCCGGATCTGAAATACTCGGAAAGTTCAAGAAGCTCCGGAGTATCAGACAGGAG  
GGGTACCCTCTCTGCGCAGCATGGGAACCGCTGGTGGTGGGGGATACAATACGGCAGCCAGGAGATCTAGGAAATCTGGCCCTGTACGTCCAC  
CAGCGTTCAGATGAGGAGACCTTAGGGTGACCAAGTCCGCACTTAGGATAGAGGACTGTTGTCGCCGAGTGTGAGGAGGAGAATGAGAGG  
AGAATGTTCCAGTGTAACTGGAATAGCTAAGATGACGGGGTACCCCATGACTGGAAGACAGATAGCTTCTGATAGCTCAGGAGGAGGAACT  
GGATACCTGAGACTATTGAGCCAACAGTCTGATACAGTTGTTGCTATATGTCGGAGAGACTGGATGCTGAGTTACTTTAGAAAGAAGGGTTGC  
TATCCGAAGTGGTATCTTATCCGGTCAATTTCAAGGGTTTCATAGACAAGAACAAGAACCCCAAGAGAAGTATATGACGATGTACGACTTATGG  
GGCTGTGTAACATTCGGGAAGACGCTTAACTTCAATTTACAGCCCTGATCTAGCGGAGATAACTAAGGACTCGGCTTGGCAGTGTGAGTCCAGGAA  
TGGCCAGGAACTTTGACAGGTTGTCGCTTCCAGTATTTGTACGATAAAGACCCCAACCCCAAGTGGGAGGTTAAGTCACTGCGAGTAAATAGAT  
GCCTTTATAACGGCTGAGCTGACCTGCTCAAAGGAGATGAACAAGAGAGAGAAGGGGGCAATGGATATGAAAGACAAGATAATCATCCAGTGT  
GGGAAGGAGCTGGAAGTGAAGGAGGACACAGGGAGGGCGTTTACGAAACAGACTGCCACTCAAAGATACTTTCAAGTCTCGTTAGAAATCAACACT  
CGAGACGGGATCTTCCCATATGTAGACGAACAGTCAATGACAGAGAGTGAAGCGCTATTGCAACAACACATGGCTCAGGTCAGGCAAGGCTGGGA  
GGGACATCTGAGTTGCTGATTTAGATCTTCAAGTGGTGGTGGGATAGGCAAGTCAATGCTGCTCAAGTCAATGCTGCTCAAGTCAAGACGAGATC  
TTTGGTCTCAACGGCATATATGAAAATAGTCACTCTTCTTTTGTGGTGTTCACCTTTTGAACAACAGATTCTCTCTCTCTGACTATGATAGT  
AAAGGCCCATACCTGGGCGCTTCTACTTGGAGGACTTCTGCGGAGGGTGTGAAGGAATGCATCAGAAGAAGTGGACTCACTTACCATAGGCGTC  
ATAAAGCTTGGCTTAGAGAGGTGTAATAAGAAAGGCAACATCATGGGCCAAGGGGACAACCAGGTCATCTCTCTGCATTACAGTATGGAGGATCTT  
CCCAATAAAGATGTAATGAGGGCTGCTTTTCTTCAAGCTTGCAGACTTACTTTGAGGCAAGTGGGCAACAGGTTAAAGCTCAAGAGACGTTGAT  
TCAAGCAAGCTGCACGAATATGGGAAACAGCGGATTTACAACGGAAATGCTATTTACCATGGCCACAAGAAAGCAACCAATGATTTCTGATATA  
AATGACGGGCTATTTCAATACCATCGTCTATATCAACATTAACACTACAACAGAAATCTATCGCCAAAGGTAGATAGACCCCGATGACGCTT  
CTAATGAACCAAAATGCTGGTGGCAAAATTAACCTGTGCAAGAAATTAACCTTTGATGCTCTATGAACCCCGAAGATGCGCTGCAACATCGCTC  
GTGTTCCCTGGCGATTTTGGAGGTTCACTTACCCTGCTACTCTCTCAGCTGTAAAGGGCCACGACCTGCACTGAACTACGCTAGGAGATA  
GCAATGACACTCAAGGAGCATTTCCAGCCGATACCGGACTGTCATGAACGTGTGGAGGATGAGGCCCCAATCCCTGCATCATCTGCTTTGGAG  
AGAACAAGGCTCTATGAGGATCCCTTTAGCCTAAACGTAAGGAGGCTCCCGTCAAGCGAATCTGAGATACGTCAGACACTCTCTCGTTCCCTCAAG  
TCCGCGCAGTATCAACACCCCTGTATTAAGAAGCTGTACTCCACAGATGATCGGTCAGCTACTCAGAGCTCATACGCATACTTGATACGATGGAG  
CCATGATCCCCCGATTTTGCAGGTTCCATTTGAAAGATAGCAATGCGGGATAGGGAAGATGCTCCAGGCAAGGCTCACCACATCAAAAACAAT  
GAGAAAGCAACTGTATCTTACACCAGGTAATCTCTCATTGATTTAATAAAAAGAGAAAAATGCAGAGCTGTCGCGAGAATTTGCTAGGAGGTTAAGC  
TCCAACAACCTTCTCAATGAACGCCGATATTTCTCTGTGATCTGCCCTATGAACCTGGCAGAGAACTCAGGAAAGATAGCTGGGGAAGAAATTT  
ATAGGACTGTCCAAGCCCTACTACCACCAAGTTGTGCTCAAAGACATCGACGCTGCCACCGAGGATGAACGGGATAGATCAATCGTAGTTAAG  
CTGCTGACCAAGGCTCGTGAAGGGCACCCCTACTTCTCTACCAGGTTCCGACCTTACAAAACCATATGTCGGGAGCAGGACAAGGAGAAGGTTGACC  
AAACCGACCATCGACCTAACAGAGAAGACAAGCTACACGAGGGCTTCAAGCGCTTAGGAAAGCTCAAACCTGGCTACAGATCATCTCAGCCCT  
AACCTGACATCACTCATAGATAGATTGCTGTGTGAAAAGCTTGAAGTGTGATGTTCTCCCTGACTGTGCTGATGACGTCAGTGGTGTATTTGCTAAG  
ATTAGATCAGGGAATATCTTTTCACTGACTCTCGACCGATGTAGAAGGCTTAGCGCTCAGATCAACTCCCTTGTACCATCCCAAGTCAATTCAGC  
CAGTCCAGCAACCTGCTCCAAGGATGCTCAAGATGGGGAAGATTACTCTATATTTCTTCCAAAAGATATACGCTGAGAATATGGCAGCTCTGCT  
CTAGGATCGAGAATACTTTGCTAGAAATAGGTGTACAAGTTCTCCAAATAGAGAAAGCTTACTTTTAAAGGGCCCGCTAATCAAGTCTTTGTT  
TGTGTTTAGATACATCTGATCCCATCCAGGACTGGGAGAGAACCAGATGCCPCAGCAGATGTTGCACAATGGCCATGTTGGCTGAATGTA  
TTGCTATGTTTGGCACTCCATGCTGTGGCTTAAAGGATACAGGAGTATTACTCAGCTCTGCCCCCTGTGAGAGGATGCTTGACAAAATAATA  
CTTT

>c70967\_g1\_i1\_len=511

GTTATTTTGTGCATAATTAATGTAGTGTGTAACCAATGCGCAGATGTCATCATTTACGTCCTAATGGCCGCTCCATTTAATGTATGTGCCTAT  
GGTTACCAGATAAATGAGGATTAACCTTCCAAAATTTGATATAATCAATAATTTAACTTGGAGTTTACACGGATGGTGGCCACAAGTTTTATTG  
CCACAACAATCTCCGATACCCATCAGCAATTTTATTCTCATTTTATTGCTTTGAATTTAACTAATCACTTTTATGATATGACTCCTTCTCAACAT  
TGTGTTGTTCCGGCTATCATGAATATAAAAAACATGGAGCTCATAGTGGATATAATATGACCACATGGATTAATCAAATCAAATGGTGTGTTAGCT  
GTGAAGACTCAGTTATCTCATTGTTACGTACACCAATGCCGATATAATCATGTTTAAAGTGAATATTCACAATCCTGTACGTTACCTAAACCA  
CTTCTCTACTATTGGATGCTGATGAAT

>c14012\_g1\_i1\_len=320

GGCTAACCCACATACCAGGATACAAAATGCAAACGGATTTTCCGTGGCATGTGTCTCCAATTCGCCTCATCCCCGGTCCGGTGCCCCGGAACCCACGT  
CAAGTTGACCCAAAGTGTGAAGGACGTTTCAGCTGCGTCTGTGGTAAAACCCGGTGGAGCAATCCAATTGGTGTGCAAAAATGTTCCACCCAGT  
ACATTTTCAAGTGGGGCCGCCTTGTATTACCCCATGGAGATACAAAAGCAGTACAATCACAGATAGCAATCCAAAAGTCTCAAAGCTGAAATT  
GACGGAAACGCCTTTGTCTGATGATCCTGAAC

>c15103\_g1\_i1\_len=433

GTGCATCGATCGTAACCGAGTCCAAAGGCTTGGCCCATATGGTCTAGGCAAATTCGTAATGTTTCATTGTTGATGATAGTAATGACTGGTGACA  
ATGTGTGAATAAAAGCGCCTTCTGCACCAGCAGGAGGCCAGTTCCATCAGGTCTTCGGACCAATGCCAACTAAATGGGTTTTAATATATATCACT  
GCCAGTGTTCGGTTCGTAAGTAATGCCCAAAGTGGTCCGTGGGTCCGGCTTCTTCATCAGTGGTTCAGCATATTTCAAGTGTGTTACTGTAGAA  
GCAATACCGGAGGAACACCAACTAACAAATTAAGTCCACACCATCATGATGGACGAATGCCACTTTTTGGACCCGATGTCAATAGCGGCCCGGG  
AGTGATGGATTACTTAAATTTACTATTGTGCTGGGTGAGAACCACTGA

>c35778\_g3\_i1\_len=473

CTTGTCTGTCAAAAGCCACGGACAAATGTGGGCTCTGTACTTTTTCCATCGCGGTGATCTGCGGGTGGGTACGCAGCCATACATGCATCCGTT  
CAACAGATTGGGTCCAGAGGGGAGGACATCATGGTCCATCCACCAGCAATACGAGTGGATGACCACTGGTGTGCCAAAAACATTGGCCACCAGT  
TAGCGATCGAACGATCGCCATCAACCGATGAAGCATGATGTGATCGAGCTAGGTGAGGCTAGTTCGAACTAATTAATTTTCGATTAACGATCGT  
GTGGAAGCCCTAGCGGGAGCGGGCCGATCGAAGTCTGTTGCCAGAACATTGGTGACCCCGACGTGATAAGATTCTTATCACTCCTAAATCGCGT  
CGTGTGAACAAGAGAAAAGTGTCCATGTCTTCCGGTGGTGTCAAAAATTCATGGCTTTAGTGCTAACCCAAGTGATTTTCCGAAT

>c36162\_g1\_i2\_len=667

GAAACTTAGCCAAATCGTCAATTTGATTTTCGGTGTAGTCCAAAATAAGTATCGTACCTAAAGTGATAAATCAAAAAGTGGCAGCAACGAAACGAAA  
AATGGGTTCTAGTGAATCAAAGGAAAAGCCCATAGTGGACGACAGTCATGTCATTAATATTTCTTAATGCAATAATAAACTAGCTCAGCAGCGCGG  
CGAGTCAGCTAAAACTCTATTCAAATCGCAAACGCACTGACAGTGTGGCATAACATAGCTGTACTAGTGAATTGGAGCGCTGTTTTATTACAAATT  
GTACAAGGTAGTGACAAAAGTACGAACGAATGCCACAGCGGTGGATAGCAGTAAACCAGATATAGTGCCGCATGTAATTTGAACGAGACCCCGGA  
ACAAAACGAAAAACAAAAGGTGCGCGTGAACATTTGGGACTGGCATCACCAACCCGATTAGCAAAATGCGTGAACAAATGCGATTTT  
CATTACAAGCCTTGCACTATTAGACAAAATCATCTATTTCGACGGAAATTTCTGAGATGGGAGCCAATTACAACGTTGACCTCGTGATTGACTTGA  
GAACAGCTGTGAACACAGTCATACAAAAGTGAGGATGAGGTCATCTTGGCAAAGCAGCCCATCACAAAATCATCTATGGTGCAGCGACGAGG

>c36237\_g2\_i3\_len=240

CAGACCTCCTCCACATACAAGTGTCTTTCTGTGCGGTGTCAATACCACACCCACATACCATAACAAACCAAGCTGATCCGGGCACGATGAGAAG  
CATGAACATGATACTTGATCACTTTTCTGTGCAATGCTCTCATAGTTGTTTTTCATGGCGTTTCGCATCAATAAAATCAAATGGTACTGATATATTT  
CATCATTCGCTGCTACCGAGCTATGGGGAAGTTTAAAGTGTTCCTTAG

**Table S2a. Contig based virus identification of viruses in Cairns *Ae. aegypti*.** Contigs were assembled from reads obtained from sequencing Cairns *Ae. aegypti* and were used for virus identification using the NCBI protein and nucleic data bases. Percentage amino acid identity is shown with the number in brackets the percentage of the contig length aligned in the BLAST hit; this was added as the reference sequence was often only a partial sequence. Underlining highlights viruses (or phage) or nearest relatives (italics), which appear to be unique to Cairns mosquitoes, with no reads from Bangkok aligning with the indicated Cairns contig(s) and/or no Cairns contigs overlapping with Bangkok contigs. Grey shading in the **Contig id** column represents contigs that overlap with contigs identified from Bangkok *Ae. aegypti*. <sup>1</sup>Similar match to *Ochlerotatus caspius* flavivirus, Hango virus, and Parramatta River virus. <sup>2</sup>c50692\_g1\_i1 is possibly derived from an EVE (see Table S2). <sup>3</sup>Similar match to Blacklegged tick phlebovirus.

| Classification                                         | Virus or nearest match                  | Contig id                  | Amino acid identity | Gene                             | Length (nucleotides) | Mean read depth | E Data ncbi protein | Host                                       | Refs                                   |
|--------------------------------------------------------|-----------------------------------------|----------------------------|---------------------|----------------------------------|----------------------|-----------------|---------------------|--------------------------------------------|----------------------------------------|
| <b>Known viruses of <i>Ae aegypti</i></b>              |                                         |                            |                     |                                  |                      |                 |                     |                                            |                                        |
| Genus; <i>Phlebovirus</i> ssRNA(-)                     | Phasi Charoen-like virus                | c9421_g1_i1                | 98.5(60)            | Nucleocapsid,                    | 1339                 | 62661           | 6.49E-175           | <i>Ae aegypti</i>                          | 1,2                                    |
|                                                        |                                         | c9498_g1_i1                | 97(97)              | glycoprotein, RNA                | 3842                 | 28142           | 0                   |                                            |                                        |
|                                                        |                                         | c9500_g1_i1                | 99(99)              | polymerase                       | 6697                 | 18605           | 0                   |                                            |                                        |
| Genus; <i>Flavivirus</i> ssRNA(+)                      | Cell fusing agent virus                 | c9499_g1_i1                | 99(94)              | Polyprotein                      | 10684                | 664             | 0                   | <i>Ae aegypti</i>                          | 3                                      |
| Unclassified ssRNA(+)                                  | Humaita-Tubiaca virus                   | c9445_g1_i1                | 98(80)              | Capsid                           | 1618                 | 16949           | 0                   | <i>Ae aegypti</i>                          | 2                                      |
|                                                        |                                         | c9477_g1_i1                | 97(51)              | Replicase                        | 2761                 | 19494           | 0                   |                                            |                                        |
| Unclassified dsRNA (probably a Totivirus)              | Unnamed                                 | c7017_g1_i1                | 96(99)              | PArp-RdRp, partial (Contig 5425) | 238                  | 140             | 4.85E-43            | <i>Ae aegypti</i> Thailand                 | 4<br>AJT39<br>589.1,<br>KP64<br>2128.1 |
|                                                        |                                         | c8022_g1_i1                | 90(99)              |                                  | 265                  | 437             | 3.79E-50            |                                            |                                        |
|                                                        |                                         | c8271_g1_i1                | 95(99)              |                                  | 892                  | 465             | 0                   |                                            |                                        |
|                                                        |                                         | c9075_g1_i1                | 97(99)              |                                  | 619                  | 389             | 1.14E-138           |                                            |                                        |
|                                                        |                                         | c9470_g1_i1                | 98(41)              |                                  | 6772                 | 1081            | 0                   |                                            |                                        |
|                                                        |                                         | c37343_g1_i1               | 95(99)              | 253                              | 298                  | 1.14E-47        |                     |                                            |                                        |
| <b>Mosquito-associated viruses</b>                     |                                         |                            |                     |                                  |                      |                 |                     |                                            |                                        |
| Genus; <i>Flavivirus</i>                               | <i>Xishuangbanna flavivirus</i>         | c55497_g1_i1 <sup>1</sup>  | 60(79)              | RNA polymerase Polyprotein       | 239                  | 27              | 3.29E-22            | <i>Ae albopictus</i>                       | 5                                      |
| Genus: <i>Orthomyxovirus</i> ssRNA(-)                  | <i>Whidbey virus</i>                    | c9280_g1_i1                | 85(92)              | PB1                              | 2438                 | 285             | 0                   | <i>Aedes dorsalis</i>                      | AQU42<br>764.1                         |
|                                                        |                                         | c9415_g1_i1                | 79(90)              | PA                               | 2203                 | 299             | 0                   |                                            |                                        |
|                                                        |                                         | c25711_g1_i1               | 76(92)              | PB2                              | 2417                 | 288             | 0                   |                                            |                                        |
| Unclassified. Order; <i>Mononegavirales</i> ssRNA(-)   | <i>Xincheng mosquito virus</i>          | c4670_g1_i2<br>c4670_g1_i1 | 37(77)<br>59(81)    | Glycoprotein                     | 212<br>251           | 2<br>17         | 2.34E-9<br>6E-17    | <i>Anopheles sinensis</i>                  | 6                                      |
| Family; <i>Bunyaviridae</i> Phasmavirus like. ssRNA(-) | <i>Wuhan mosquito virus</i><br>2        | c7211_g1_i1                | 34(96)              | Glycoprotein precursor           | 447                  | 18              | 4.05E-21            | <i>Culex, Anopheles, Aedes sp</i>          | 6                                      |
|                                                        |                                         | c8461_g1_i1                | 44(96)              |                                  | 308                  | 23              | 7.49E-24            |                                            |                                        |
|                                                        |                                         | c8461_g2_i1                | 39(82)              |                                  | 809                  | 12              | 7.87E-47            |                                            |                                        |
| Unclassified; <i>Rhabdoviridae</i> ssRNA(-)            | <i>Wuhan nosquito virus 9</i>           | c33645_g1_i1               | 28(60)              | Glycoprotein ORF1                | 930                  | 8.59            | 1.5E-015            | <i>Culex, Aedes sp</i>                     | 6                                      |
|                                                        |                                         | c50692_g1_i1 <sub>2</sub>  | 37(83)              |                                  | 383                  | 8.7             | 1.28E-12            |                                            |                                        |
| Genus; <i>Totivirus</i> dsRNA                          | <i>Anopheles totivirus</i>              | c9501_g1_i1                | 45(37)              | RdRp                             | 6086                 | 1106            | 0                   | <i>Anopheles gambiae</i>                   | 7                                      |
|                                                        |                                         | c9501_g1_i1                | 27(42)              | Putative capsid                  | 6086                 | 1106            | 4.00E-82            |                                            |                                        |
| Unclassified                                           | <i>Kaiowa virus</i>                     | c32637_g1_i1               | 75(99)              | Putative glycoprotein            | 214                  | 11              | 3.9e-192            | <i>Brazilian mosquitoes</i>                | 8                                      |
| Unclassified                                           | <i>Hubei toti-like virus10</i>          | c8605_g1_i1                | 39(96)              | Hypothetical protein 1           | 410                  | 268             | 1.50E-16            | Mosquito                                   | 9                                      |
|                                                        |                                         | c48383_g1_i1               | 46(93)              |                                  | 229                  | 232             | 2.8E-15             |                                            |                                        |
| Unclassified                                           | <i>dsRNA virus environmental sample</i> | c2748_g1_i1                | 37(98)              | Proline-alanine-rich protein     | 373                  | 235             | 1.3E-13             | <i>Ochlerotatus sierrensis</i>             | 4                                      |
| <i>Oribivirus</i>                                      | Unnamed                                 | c9239_g1_i1                | 87(60)              | RdRp AGW51764.1                  | 4038                 | 3543            | 0                   | <i>Ochlerotatus caspius &amp; detritus</i> | 10                                     |
| <b>Other insect-associated viruses</b>                 |                                         |                            |                     |                                  |                      |                 |                     |                                            |                                        |
| Unclassified                                           | <i>Blackford virus</i>                  | c177_g1_i1                 | 45(75)              | Putative polyprotein             | 240                  | 19              | 3.6E-6              | <i>D. tristis</i>                          | 11                                     |
|                                                        |                                         | c8631_g1_i2                | 44(64)              |                                  | 333                  | 37              | 1.1E-12<br>6.5E-7   |                                            |                                        |

|                                       |                                                    |              |         |                              |      |      |          |                               |              |
|---------------------------------------|----------------------------------------------------|--------------|---------|------------------------------|------|------|----------|-------------------------------|--------------|
|                                       |                                                    | c8631_g1_i3  | 47(93)  |                              | 203  | 12   | 3.9E-4   |                               |              |
|                                       |                                                    | c9229_g1_i1  | 48(55)  |                              | 1131 | 67   |          |                               |              |
| <u>Unclassified RNA virus</u>         | <i>Hubei tombus-like virus 40</i>                  | c54631_g1_i1 | 51(96)  | Hypothetical proteins        | 221  | 5.5  | 2.3E-13  | <i>Coleoptera</i>             | 9            |
|                                       |                                                    | c11413_g1_i1 | 51(91)  |                              | 693  | 5.6  | 1.2E-51  |                               |              |
| <u>Unclassified</u>                   | <i>Diaphorina citri associated C virus</i>         | c40769_g1_i1 | 34(86)  | RdRp                         | 1259 | 7.4  | 6.07E-48 | Psyllid                       | 12           |
| <u>Family: Rhabdoviridae ssRNA(-)</u> | <i>Wuhan ant virus</i>                             | c2871_g1_i1  | 32(92)  |                              | 2961 | 7.9  | 9.5E-140 |                               |              |
|                                       |                                                    | c2871_g1_i2  | 35(98)  | RdRp                         | 2057 | 4.7  | 5.9E-125 | <i>Camponotus japonicus</i>   | 6            |
|                                       |                                                    | c32974_g1_i1 | 53(99)  |                              | 2318 | 10.6 | 0        |                               |              |
|                                       |                                                    | c51091_g1_i1 | 32(91)  |                              | 640  | 11   | 1E-23    |                               |              |
| <u>Family: Baculoviridae dsDNA</u>    | <i>Autographa californica nucleopolyhedrovirus</i> | c35321_g1_i1 | 69(72)  | ORF B                        | 563  | 6.6  | 5.59E-46 | <i>Autographa californica</i> | 13           |
| <b>Plant viruses</b>                  |                                                    |              |         |                              |      |      |          |                               |              |
| <u>Unclassified phlebovirus-like</u>  | <i>Citrus concave gum-associated virus</i>         | c14987_g1_i1 | 45(99)  | RNA-dependent RNA polymerase | 548  | 5.8  | 8.1E-46  | <i>Citrus sinensis</i>        | 14           |
| <u>Genus: Closterovirus</u>           | <i>Carrot closterovirus</i>                        | c51916_g1_i1 | 36(95)  | ORF2                         | 482  | 6.6  | 2.71E-18 | Carrot                        | 15           |
| <u>Phenuiviridae ssRNA(-)</u>         | <i>Watermelon crinkle leaf-associated virus 2</i>  | c18669_g1_i1 | 35(82)  | Nucleocapsid Polymerase      | 952  | 9.8  | 7.5E-31  | <i>Citrullus lanatus</i>      | 16           |
|                                       |                                                    | c45853_g1_i1 | 49(99)  |                              | 203  | 12   | 5.8E-13  |                               |              |
| <b>Phage</b>                          |                                                    |              |         |                              |      |      |          |                               |              |
|                                       | Enterobacteria phage SP6                           | c18294_g1_i1 | 100(53) | Protein 45                   | 339  | 158  | 7.4E-36  | Enterobacteria                | AAR900<br>38 |



**Table S2b. Contig based virus identification of viruses in Bangkok *Ae aegypti*.** Contigs were assembled from reads obtained from sequencing of Bangkok *Ae. aegypti* and were used for virus identification as in Table 1. Underlining as for Table 1 except for Bangkok contigs. Grey shading in the **Contig id** column represents contigs that overlap with contigs identified from Cairns *Ae. aegypti*. <sup>1</sup> Similar match to *Culex pipiens pallens* densovirus. <sup>2</sup> Similar match to Menghai flavivirus. <sup>3</sup> Similar match to Hubei virga-like virus 17.

| Classification                                         | Virus or nearest match             | Contig id                 | Amino acid identity | Gene                              | Length (nucleotide) | Mean read depth | E Data ncbi protein | Host                                 | Refs                                |
|--------------------------------------------------------|------------------------------------|---------------------------|---------------------|-----------------------------------|---------------------|-----------------|---------------------|--------------------------------------|-------------------------------------|
| <b>Known viruses of <i>Ae aegypti</i></b>              |                                    |                           |                     |                                   |                     |                 |                     |                                      |                                     |
| Genus; <i>Phlebovirus</i> ssRNA(-)                     | Phasi Charoen-like virus           | c125955_g1_i1             | 81(54)              | Nucleocapsid                      | 320                 | 4.0             | 1.22E-22            | <i>Ae aegypti</i>                    | 1,2                                 |
|                                                        |                                    | c33559_g1_i2              | 69(56)              |                                   | 374                 | 461             | 3.8E-23             |                                      |                                     |
|                                                        |                                    | c36351_g1_i2              | 99.6(61)            |                                   | 1327                | 96046           | 7.1E-178            |                                      |                                     |
|                                                        |                                    | c38870_g1_i1              | 54(100)             | 246                               | 5.0                 | 2.1E-28         |                     |                                      |                                     |
|                                                        |                                    | c36369_g1_i1              | 99(94)              | Glycoprotein                      | 1239                | 48052           | 0                   |                                      |                                     |
|                                                        |                                    | c36405_g1_i1              | 99(96)              |                                   | 2738                | 51100           | 0                   |                                      |                                     |
| Genus; <i>Flavivirus</i> ssRNA(+)                      | Cell fusing agent virus            | c36406_g1_i1              | 99.6(99)            | RdRp                              | 6400                | 28145           | 0                   | <i>Ae aegypti</i>                    | 17                                  |
| Unclassified ssRNA(+)                                  | Humaita-Tubiaca virus              | c36290_g1_i1              | 98(78)              | Capsid                            | 1668                | 19454           | 0                   | <i>Ae aegypti</i>                    | 2                                   |
|                                                        |                                    | c36361_g1_i1              | 97(49)              | Replicase                         | 2839                | 18407           | 0                   |                                      |                                     |
| Unclassified dsRNA                                     | Unnamed                            | c36064_g1_i1              | 91(99)              | PA, partial (Contig 5425)         | 887                 | 266             | 0                   | <i>Ae aegypti</i><br><i>Thailand</i> | 4 AJT39<br>589.1,<br>KP64<br>2128.1 |
|                                                        |                                    | c36389_g2_i2              | 99(99)              |                                   | 456                 | 305             | 2E-97               |                                      |                                     |
|                                                        |                                    | c29461_g1_i1              | 96(100)             |                                   | 238                 | 238             | 5E-45               |                                      |                                     |
|                                                        |                                    | c33519_g1_i1              | 97(99)              |                                   | 502                 | 261             | 2.3E-108            |                                      |                                     |
|                                                        |                                    | c28080_g1_i1              | 97(37)              |                                   | 284                 | 319             | 8E-55               |                                      |                                     |
|                                                        |                                    | c36389_g2_i3              | 96(44)              |                                   | 677                 | 276             | 1.2E-42             |                                      |                                     |
| <u>Subfamily: <i>Densovirinae</i> ssDNA</u>            | <i>Aedes aegypti</i> densovirus 2  | c30446_g1_i1 <sup>1</sup> | 98(61)              | Non-structural protein 1 & capsid | 3790                | 106             | 0                   | <i>Ae aegypti</i>                    | 18                                  |
| <b>Mosquito-associated viruses</b>                     |                                    |                           |                     |                                   |                     |                 |                     |                                      |                                     |
| Genus; <i>Flavivirus</i>                               | <i>Xishuangbanna flavivirus</i>    | c27654_g1_i3              | 67(57)              | RdRp                              | 368                 | 38              | 4.94E-35            | <i>Ae albopictus</i>                 | 5,19                                |
|                                                        |                                    | c14012_g1_i1 <sup>2</sup> | 59(73)              | Polyprotein                       | 320                 | 18              | 7.42E-40            |                                      |                                     |
| Genus; <i>Orthomyxovirus</i> ssRNA(-)                  | <i>Whidbey virus</i>               | c35946_g1_i1              | 85(92)              | PB1                               | 2434                | 104             | 0                   | <i>Ae dorsalis</i>                   | 20                                  |
|                                                        |                                    | c35196_g1_i1              | 79(90)              | PA, partial                       | 2187                | 115             | 0                   |                                      |                                     |
|                                                        |                                    | c32973_g1_i1              | 76(93)              | PB2                               | 2402                | 131             | 0                   |                                      |                                     |
| Unclassified. Order; <i>Mononegavirales</i> ssRNA(-)   | <i>Xincheng mosquito virus</i>     | c32243_g1_i1              | 39(72)              | Glycoprotein                      | 318                 | 12              | 3.4E-15             | <i>Anopheles sinensis</i>            | 6                                   |
|                                                        |                                    | c32243_g1_i2              | 42(74)              |                                   | 356                 | 43              | 1.7E-19             |                                      |                                     |
| Family; <i>Bunyaviridae</i> Phasmavirus like. ssRNA(-) | <i>Wuhan mosquito virus 2</i>      | c35613_g1_i1              | 42(78)              | Glycoprotein precursor            | 2049                | 80              | 4.2E-118            | <i>Culex, Anopheles, Aedes sp</i>    | 6                                   |
| <u>Family <i>Rhabdoviridae</i> ssRNA(-)</u>            | <i>Tongilchon virus 1</i>          | c124296_g1_i1             | 57(98)              | Putative RdRp                     | 280                 | 4.2             | 2E-26               | <i>Culex bitaeniorhynchus</i>        | 21                                  |
| Unclassified; <i>Rhabdoviridae</i> ssRNA(-)            | <i>Wuhan mosquito virus 9</i>      | c64714_g1_i1              | 30(80)              | Glycoprotein ORF1                 | 477                 | 3.3             | 6E-7                | <i>Culex, Aedes sp</i>               | 6                                   |
|                                                        |                                    | c1882_g1_i2               | 37(79)              |                                   | 472                 | 10.8            | 2E-11               |                                      |                                     |
| Genus; <i>Totivirus</i> dsRNA                          | <i>Anopheles totivirus</i>         | c36387_g1_i1              | 45(36)<br>28(41)    | RdRp & Putative capsid            | 6125                | 1509            | 0<br>2.E-107        | <i>Anopheles gambiae</i>             | 7                                   |
| Unclassified                                           | <i>Kaiowa virus</i>                | c15947_g1_i1              | 73(72)              | Putative glycoprotein             | 1115                | 5.6             | 1e-146              | <i>Brazilian mosquitoes</i>          | ASV45<br>863.1                      |
| Unclassified virus                                     | <i>Croada virus</i>                | c32738_g1_i1              | 68(36)              | Putative glycoprotein             | 529                 | 52              | 5E-23               | <i>Psorophora pools</i>              | ASV45<br>861.1                      |
|                                                        |                                    | c32738_g1_i3              | 68(29)              |                                   | 664                 | 31              | 1.8E-22             |                                      |                                     |
| <u>Unclassified RNA virus</u>                          | <i>Wenzhou sobemo-like virus 4</i> | c54150_g1_i1              | 84(43)              | Hypothetical protein              | 3099                | 1137            | 1.6E-48             | Mosquito                             | 9                                   |
| <u>Unclassified virus</u>                              | <i>Hubei mosquito virus 2</i>      | c70842_g1_i1              | 48(83)              | Hypothetical protein              | 1639                | 1491            | 8E-142              | Mosquito                             | 22                                  |
| Family; <i>Chuviridae</i> ssRNA(-)                     | <i>Chuvirus Mos8Chu0</i>           | c914_g1_i1                | 63(86)              | Putative nucleoprotein            | 836                 | 9.6             | 6.9E-75             | <i>Culiseta minnesotae</i>           | API6<br>1<br>889.1                  |
| <b>Other insect-associated viruses</b>                 |                                    |                           |                     |                                   |                     |                 |                     |                                      |                                     |
| Unclassified                                           | <i>Blackford virus</i>             | c34693_g2_i2              | 46(46)              | Putative polyprotein              | 880                 | 44              | 6.9E-30             | <i>D. tristis</i>                    | 11                                  |
|                                                        |                                    | c34693_g2_i3              | 46(39)              |                                   | 853                 | 26              | 5.1E-23             |                                      |                                     |

|                             |                                             |                           |         |                             |      |      |          |                       |             |
|-----------------------------|---------------------------------------------|---------------------------|---------|-----------------------------|------|------|----------|-----------------------|-------------|
|                             |                                             | c36305_g1_i2              | 47(36)  |                             | 1763 | 45   | 1.2E-49  |                       |             |
|                             |                                             | c36305_g1_i3              | 47(36)  |                             | 1757 | 56   | 1.1E-49  |                       |             |
|                             |                                             | c36305_g1_i5              | 47(50)  |                             | 1256 | 40   | 2.4E-51  |                       |             |
|                             |                                             | c46271_g1_i1              | 45(52)  |                             | 538  | 9.0  | 2.3E-14  |                       |             |
|                             |                                             | c28983_g2_i1              | 46(33)  |                             | 4421 | 409  | 1.1E-124 |                       |             |
| Unclassified                | Chaq virus                                  | c123170_g1_i1             | 38(97)  | Orf1                        | 521  | 7.6  | 9.7E-32  | Pachypsylla           | 23          |
|                             |                                             | c27006_g1_i1              | 59(61)  |                             | 1437 | 8068 | 2.8E-111 | psyllid               |             |
| Unclassified RNA            | Hubei virga-like virus 12                   | c70967_g1_i1              | 31(88)  | Hypothetical protein        | 511  | 4.8  | 1.4E-07  | Dipteria              | 24          |
| Family; Baculoviridae dsDNA | Autographa californica nucleopolyhedrovirus | c39646_g1_i1              | 56(70)  | ORF B                       | 1084 | 7.0  | 2E-91    |                       |             |
|                             |                                             | c76297_g1_i1              | 75(99)  | ORF B                       | 529  | 3.7  | 2E-88    | Spodoptera frugiperda | 25          |
|                             |                                             | c55859_g1_i1              | 100(48) | AcOrf-4 peptide             | 395  | 2.8  | 3.1E-38  |                       |             |
|                             |                                             | c82294_g1_i1              | 99(99)  | AcOrf-5 peptide             | 206  | 3    | 1.10E-41 |                       |             |
| <b>Other</b>                |                                             |                           |         |                             |      |      |          |                       |             |
| Unclassified RNA viruses    | Beihai barnacle virus 12                    | c33969_g1_i1              | 44(91)  | RdRp                        | 1727 | 4527 | 4.4-163  | Barnacle              | 7           |
| <b>Plant virus</b>          |                                             |                           |         |                             |      |      |          |                       |             |
| Genus Tobamovirus ssRNA(+)  | Cucumber fruit mottle mosaic virus          | c36375_g1_i1 <sup>3</sup> | 28(47)  | Unnamed protein             | 6510 | 108  | 5.41E-58 | Cucumber              | NP_072162.1 |
| <b>Phage</b>                |                                             |                           |         |                             |      |      |          |                       |             |
|                             | Spiroplasma phage 4                         | c40444_g1_i1              | 36(84)  | Hypothetical protein Sp-4p1 | 345  | 5.1  | 4.9E-6   |                       | 26          |

## References

- Chandler, J. A. *et al.* Metagenomic shotgun sequencing of a Bunyavirus in wild-caught *Aedes aegypti* from Thailand informs the evolutionary and genomic history of the Phleboviruses. *Virology* **464-465**, 312-319 (2014).
- Aguiar, E. R. *et al.* Sequence-independent characterization of viruses based on the pattern of viral small RNAs produced by the host. *Nucleic Acids Res* **43**, 6191-6206 (2015).
- Yamanaka, A., Thongrungrat, S., Ramasoota, P. & Konishi, E. Genetic and evolutionary analysis of cell-fusing agent virus based on Thai strains isolated in 2008 and 2012. *Infect Genet Evol* **19**, 188-194 (2013).
- Chandler, J. A., Liu, R. M. & Bennett, S. N. RNA shotgun metagenomic sequencing of northern California (USA) mosquitoes uncovers viruses, bacteria, and fungi. *Front Microbiol* **6**, 185 (2015).
- Fan, H. *et al.* Complete genome sequence of Xishuangbanna flavivirus, a novel mosquito-specific flavivirus from China. *Arch Virol* **161**, 1723-1727 (2016).
- Li, C. X. *et al.* Unprecedented genomic diversity of RNA viruses in arthropods reveals the ancestry of negative-sense RNA viruses. *Elife* **4**, e05378 (2015).
- Fauver, J. R. *et al.* West African *Anopheles gambiae* mosquitoes harbor a taxonomically diverse virome including new insect-specific flaviviruses, mononegaviruses, and totiviruses. *Virology* **498**, 288-299 (2016).
- Pauvolid-Correa, A. *et al.* Novel Viruses Isolated from Mosquitoes in Pantanal, Brazil. *Genome Announc* **4**, e01195-01116 (2016).
- Shi, M. *et al.* Redefining the invertebrate RNA virosphere. *Nature* **540**, 539-543 (2016).
- Cook, S. *et al.* Novel virus discovery and genome reconstruction from field RNA samples reveals highly divergent viruses in dipteran hosts. *PLoS One* **8**, e80720 (2013).
- Webster, C. L., Longdon, B., Lewis, S. H. & Obbard, D. J. Twenty-Five New Viruses Associated with the Drosophilidae (Diptera). *Evol Bioinform Online* **12**, 13-25 (2016).
- Nouri, S., Salem, N. & Falk, B. W. Complete Genome Sequence of Diaphorina citri-associated C virus, a Novel Putative RNA Virus of the Asian Citrus Psyllid, *Diaphorina citri*. *Genome Announc* **4**, e00639-00616 (2016).
- Friesen, P. D. & Nissen, M. S. Gene organization and transcription of TED, a lepidopteran retrotransposon integrated within the baculovirus genome. *Mol Cell Biol* **10**, 3067-3077 (1990).
- Navarro, B. *et al.* The first phlebo-like virus infecting plants: a case study on the adaptation of negative-stranded RNA viruses to new hosts. *Mol Plant Pathol* (2017).
- Menzel, W., Goetz, R., Lesemann, D. E. & Vetten, H. J. Molecular characterization of a closterovirus from carrot and its identification as a German isolate of Carrot yellow leaf virus. *Arch Virol* **154**, 1343-1347 (2009).
- Xin, M. *et al.* Two Negative-Strand RNA Viruses Identified in Watermelon Represent a Novel Clade in the Order Bunyavirales. *Front Microbiol* **8**, 1514 (2017).
- Bolling, B. G. *et al.* Insect-specific viruses detected in laboratory mosquito colonies and their potential implications for experiments evaluating arbovirus vector competence. *Am J Trop Med Hyg* **92**, 422-428 (2015).
- Sivaram, A. *et al.* Isolation and characterization of densovirus from *Aedes aegypti* mosquitoes and its distribution in India. *Intervirology* **52**, 1-7 (2009).
- Blitvich, B. J. & Firth, A. E. Insect-specific flaviviruses: a systematic review of their discovery, host range, mode of transmission, superinfection exclusion potential and genomic organization. *Viruses* **7**, 1927-1959 (2015).
- Makhsous, N. *et al.* Isolation and characterization of the fall Chinook aquareovirus. *Virol J* **14**, 170 (2017).
- Hang, J. *et al.* Genome Sequences of Five Arboviruses in Field-Captured Mosquitoes in a Unique Rural Environment of South Korea. *Genome Announc* **4**, e01644-01615 (2016).
- Shi, M. *et al.* High-Resolution Metatranscriptomics Reveals the Ecological Dynamics of Mosquito-Associated RNA Viruses in Western Australia. *J Virol* **91**, e00680-00617 (2017).
- Webster, C. L. *et al.* The Discovery, Distribution, and Evolution of Viruses Associated with *Drosophila melanogaster*. *PLoS Biol* **13**, e1002210 (2015).
- Shi, M. *et al.* Divergent Viruses Discovered in Arthropods and Vertebrates Revise the Evolutionary History of the Flaviviridae and Related Viruses. *J Virol* **90**, 659-669 (2015).
- Ayres, M. D., Howard, S. C., Kuzio, J., Lopez-Ferber, M. & Possee, R. D. The complete DNA sequence of *Autographa californica* nuclear polyhedrosis virus. *Virology* **202**, 586-605 (1994).
- Renaudin, J., Pascarel, M. C. & Bove, J. M. *Spiroplasma* virus 4: nucleotide sequence of the viral DNA, regulatory signals, and proposed genome organization. *J Bacteriol* **169**, 4950-4961 (1987).

**Table S3. Contigs showing homology to EVEs.** \*c50692 might be derived from a relative of Wuhan mosquito virus 9 (Table 1). \*\* Closest match was to a reverse transcriptase-like enzyme in a transposable genetic element in *Drosophila melanogaster*. \*\*\*EVE based on presence of multiple stop codons.

| Contig id from Cairns | Nucleotide identity | Gene                                                                        | Length (nucleotides) | Mean read depth | E Data ncbi protein | Refs         |
|-----------------------|---------------------|-----------------------------------------------------------------------------|----------------------|-----------------|---------------------|--------------|
| c9237_g1_i1           | 95                  | PREDICTED: <i>Aedes aegypti</i> uncharacterized LOC110677206                | 382                  | 16              | 1.1E-26             | <sup>1</sup> |
| c25880_g1_i1          | 99                  | Uncharacterized protein LOC110677205                                        | 513                  | 5.9             | 2.2E-30             | <sup>1</sup> |
| c50692_g1_i1*         | 88                  | PREDICTED: uncharacterized protein LOC109422677 [ <i>Aedes albopictus</i> ] | 383                  | 8.7             | 2E-40               | <sup>2</sup> |
| c7681_g1_i1           | 85                  | Uncharacterized protein LOC110677235                                        | 734                  | 7.9             | 8.3E-102            | <sup>1</sup> |
| c49221_g1_i1          | 84                  | Uncharacterized protein LOC110677235                                        | 303                  | 4.5             | 2.7E-49             | <sup>1</sup> |
| c7681_g1_i1           | 85                  | Uncharacterized protein LOC110677235                                        | 734                  | 7.9             | 8.3E-102            | <sup>1</sup> |
| c23353_g1_i1          | 88                  | Uncharacterized protein LOC110677235                                        | 208                  | 3.2             | 4.2E-07             | <sup>1</sup> |
| c118388_g1_i1**       | 58                  | Retrovirus-related pol polyprotein                                          | 208                  | 2.7             | 4.3E-06             | <sup>3</sup> |
| c47288_g1_i1***       | 69                  | Polyprotein                                                                 | 272                  | 5.1             | 1.21E-14            | <sup>4</sup> |

| Contig id from Bangkok | Nucleotide identity | Gene                                 | Length (nucleotides) | Mean read depth | E Data ncbi protein | Refs         |
|------------------------|---------------------|--------------------------------------|----------------------|-----------------|---------------------|--------------|
| c35604_g1_i3           | 89                  | uncharacterized protein LOC110677205 | 633                  | 35              | 3.5E-67             | <sup>1</sup> |
| c35604_g1_i6           | 89                  | uncharacterized protein LOC110677205 | 804                  | 16              | 6.3E-68             | <sup>1</sup> |
| c15103_g1_i1           | 97                  | uncharacterized protein LOC110677205 | 433                  | 15              | 7.5E-11             | <sup>1</sup> |
| c36162_g1_i2           | 98                  | uncharacterized protein LOC110677205 | 677                  | 195             | 7.6E-24             | <sup>1</sup> |
| c18481_g1_i1           | 98                  | uncharacterized protein LOC110677235 | 324                  | 7.1             | 5.1E-59             | <sup>1</sup> |
| c25987_g1_i1           | 83                  | uncharacterized protein LOC110677235 | 1033                 | 17              | 5.7E-165            | <sup>1</sup> |
| c36378_g1_i1           | 89                  | uncharacterized protein LOC110677235 | 12872                | 665             | 0                   | <sup>1</sup> |
| c36378_g1_i2           | 89                  | uncharacterized protein LOC110677235 | 10372                | 599             | 0                   | <sup>1</sup> |
| c36378_g1_i1           | 89                  | uncharacterized protein LOC110677235 | 12872                | 665             | 0                   | <sup>1</sup> |
| c54922_g1_i1           | 99                  | Subfamily of reverse transcriptases  | 1698                 | 26.3            | 0                   | <sup>5</sup> |
| c36237_g2_i1^          | 74                  | Polyprotein                          | 240                  | 91              | 3.8E-8              | <sup>4</sup> |
| c27654_g1_i1^          | 59                  | Polyprotein                          | 368                  | 38              | 1.1E-39             | <sup>6</sup> |
| c35778_g3_i1^          | 83                  | Polyprotein                          | 473                  | 27              | 1.68E-24            | <sup>4</sup> |

#### References

- 1 Matthews, B. J., McBride, C. S., DeGennaro, M., Despo, O. & Vossall, L. B. The neurotranscriptome of the *Aedes aegypti* mosquito. *BMC Genomics* **17**, 32 (2016).
- 2 Chuang, C. K., Yang, T. H., Chen, T. H., Yang, C. F. & Chen, W. J. Heat shock cognate protein 70 isoform D is required for clathrin-dependent endocytosis of Japanese encephalitis virus in C6/36 cells. *J Gen Virol* **96**, 793-803 (2015).
- 3 Saigo, K. *et al.* Identification of the coding sequence for a reverse transcriptase-like enzyme in a transposable genetic element in *Drosophila melanogaster*. *Nature* **312**, 659-661 (1984).

- 4 Fan, H. *et al.* Complete genome sequence of Xishuangbanna flavivirus, a novel mosquito-specific flavivirus from China. *Arch Virol* **161**, 1723-1727 (2016).
- 5 Shinnick, T. M., Lerner, R. A. & Sutcliffe, J. G. Nucleotide sequence of Moloney murine leukaemia virus. *Nature* **293**, 543-548 (1981).
- 6 Cholleti, H. *et al.* Discovery of Novel Viruses in Mosquitoes from the Zambezi Valley of Mozambique. *PLoS One* **11**, e0162751 (2016).

**Table S4. Contig based virus identification of mycoviruses.** Contigs assembled from *Ae aegypti* reads were used for mycovirus identification using the NCBI protein data base. Underlining in the **Classification** column indicates viruses or nearest relatives that appear to be unique to Cairns or Bangkok *Ae. aegypti*.

**Mycoviruses from Cairns *Ae. aegypti***

| Classification                                                                | Virus or nearest match                        | Contig id    | Amino acid identity | Gene                          | Length (nucleotide)  | Mean read depth | E Data ncbi protein | Host                                 | Refs                 |   |           |  |  |
|-------------------------------------------------------------------------------|-----------------------------------------------|--------------|---------------------|-------------------------------|----------------------|-----------------|---------------------|--------------------------------------|----------------------|---|-----------|--|--|
| <b>Mycoviruses</b>                                                            |                                               |              |                     |                               |                      |                 |                     |                                      |                      |   |           |  |  |
| <u>Family:</u><br><u>Partitiviridae</u><br><u>dsRNA</u>                       | <i>Botryosphaeria dothidea partitivirus 1</i> | c7547_g1_i1  | 62                  | RdRp<br>Coat protein          | 544                  | 10              | 5E-54               | <i>Botryosphaeria dothidea</i>       | 1                    |   |           |  |  |
|                                                                               |                                               | c35315_g1_i1 | 85                  |                               | 396                  | 5.7             | 2E-72               |                                      |                      |   |           |  |  |
|                                                                               |                                               | c27686_g1_i1 | 41                  |                               | 615                  | 3.8             | 2E-39               |                                      |                      |   |           |  |  |
|                                                                               |                                               | c28765_g1_i1 | 66                  |                               | 401                  | 5.6             | 3E-33               |                                      |                      |   |           |  |  |
|                                                                               |                                               | c43767_g1_i1 | 69                  |                               | 338                  | 7.3             | 7.9E-13             |                                      |                      |   |           |  |  |
| <u>Family:</u><br><u>Partitiviridae</u>                                       | <i>Ustilaginoidea virens partitivirus</i>     | c9031_g1_i1  | 79                  | RdRp<br>Coat protein          | 699                  | 14              | 3.30E-110           | <i>Ustilaginoidea virens</i>         | 2                    |   |           |  |  |
|                                                                               |                                               | c5575_g1_i1  | 88                  |                               | 446                  | 16              | 9.32E-92            |                                      |                      |   |           |  |  |
|                                                                               |                                               | c5783_g1_i1  | 70                  |                               | 733                  | 16              | 1.99E-95            |                                      |                      |   |           |  |  |
|                                                                               |                                               | c6217_g1_i1  | 61                  |                               | 886                  | 15              | 5.46E-82            |                                      |                      |   |           |  |  |
| <u>Family:</u><br><u>Partitiviridae</u>                                       | <i>Botryotinia fuckeliana partitivirus 1</i>  | c3606_g1_i1  | 78                  | RdRp                          | 492                  | 8.9             | 3.59E-88            | <i>Botryotinia fuckeliana</i>        | NC_010349.1          |   |           |  |  |
| <u>Family:</u><br><u>Partitiviridae</u>                                       | Unnamed                                       | c8342_g1_i1  | 45                  | RdRp<br>AGW51759.1            | 1509                 | 55341           | 1.38E-109           | <i>Fusarium solani</i>               | 3                    |   |           |  |  |
| <u>Family:</u><br><u>Chrysoviriadae</u><br><u>e (clade I)</u><br><u>dsRNA</u> | <i>Tolypocladium cylindrosporium virus 2</i>  | c16223_g1_i1 | 74                  | RdRp                          | 254                  | 10              | 6.02E-35            | <i>Tolypocladium cylindrosporium</i> | 4                    |   |           |  |  |
|                                                                               |                                               | c26707_g1_i1 | 42                  |                               | 500                  | 17              | 2.98E-15            |                                      |                      |   |           |  |  |
|                                                                               |                                               | c35080_g1_i1 | 49                  |                               | 257                  | 7.9             | 3.53E-16            |                                      |                      |   |           |  |  |
| <u>Genus:</u><br><u>Chrysovirus</u><br><u>(clade II)</u><br><u>dsRNA</u>      | <i>Magnaporthe oryzae chrysovirus 3</i>       | c10259_g1_i1 | 35                  | Hypothetical proteins         | 1503                 | 9.5             | 4.47E-62            | <i>Magnaporthe oryzae</i>            | US201400<br>37586 A1 |   |           |  |  |
|                                                                               |                                               | c18623_g1_i1 | 45                  |                               | 378                  | 4.4             | 3.31E-26            |                                      |                      |   |           |  |  |
|                                                                               |                                               | c18803_g1_i1 | 63                  |                               | 293                  | 7.5             | 2.83E-18            |                                      |                      |   |           |  |  |
|                                                                               |                                               | c28520_g1_i1 | 52                  |                               | 232                  | 9.3             | 1.62E-13            |                                      |                      |   |           |  |  |
|                                                                               |                                               | c31892_g1_i1 | 51                  |                               | 286                  | 5.9             | 2.36E-15            |                                      |                      |   |           |  |  |
|                                                                               |                                               | c35229_g1_i1 | 36                  |                               | 493                  | 5.4             | 9.70E-18            |                                      |                      |   |           |  |  |
| c45206_g1_i1                                                                  | 47                                            | 581          | 6.7                 | 6.35E-33                      |                      |                 |                     |                                      |                      |   |           |  |  |
| <u>Genus:</u><br><u>Chrysovirus</u>                                           | <i>Magnaporthe oryzae chrysovirus 1</i>       | c11895_g1_i1 | 69                  | RdRp.<br>Hypothetical protein | 515                  | 3.9             | 8.42E-77            | <i>Magnaporthe oryzae</i>            | 5                    |   |           |  |  |
|                                                                               |                                               | c17275_g1_i1 | 66                  |                               | 561                  | 5.2             | 5.98E-81            |                                      |                      |   |           |  |  |
|                                                                               |                                               | c54876_g1_i1 | 39                  |                               | 513                  | 5.2             | 2.69E-35            |                                      |                      |   |           |  |  |
|                                                                               |                                               | c18610_g1_i1 | 40                  |                               | 1073                 | 11              | 5.12E-30            |                                      |                      |   |           |  |  |
|                                                                               |                                               | c16117_g1_i1 | 83                  | RdRp                          | 424                  | 4.3             | 2.77E-79            |                                      |                      |   |           |  |  |
|                                                                               |                                               | c34127_g1_i1 | 93                  |                               | 361                  | 4.9             | 1.06E-72            |                                      |                      |   |           |  |  |
|                                                                               |                                               | c43319_g1_i1 | 79                  |                               | 505                  | 3.6             | 2.43E-92            |                                      |                      |   |           |  |  |
|                                                                               |                                               | c49342_g1_i1 | 78                  |                               | 1296                 | 7.9             | 0                   |                                      |                      |   |           |  |  |
|                                                                               |                                               | c16636_g1_i1 | 60                  | Major capsid protein          | 213                  | 6.0             | 7.35E-9             |                                      |                      |   |           |  |  |
|                                                                               |                                               | c18833_g1_i1 | 59                  |                               | 466                  | 5.5             | 6.04E-30            |                                      |                      |   |           |  |  |
|                                                                               |                                               | c19064_g1_i1 | 73                  |                               | 553                  | 12              | 1.18E-56            |                                      |                      |   |           |  |  |
|                                                                               |                                               | c33782_g1_i1 | 68                  |                               | 204                  | 6               | 1.62E-16            |                                      |                      |   |           |  |  |
|                                                                               |                                               | c35317_g1_i1 | 83                  |                               | 276                  | 8.7             | 4.18E-45            |                                      |                      |   |           |  |  |
|                                                                               |                                               | c45192_g1_i1 | 44                  |                               | 938                  | 5.4             | 2.70E-73            |                                      |                      |   |           |  |  |
|                                                                               |                                               | c45834_g1_i1 | 72                  |                               | 494                  | 5.2             | 1.70E-53            |                                      |                      |   |           |  |  |
|                                                                               |                                               | c48065_g1_i1 | 82                  |                               | 289                  | 5.3             | 1.94E-47            |                                      |                      |   |           |  |  |
|                                                                               |                                               | c51680_g1_i1 | 84                  |                               | 860                  | 5.6             | 1.30E-173           |                                      |                      |   |           |  |  |
|                                                                               |                                               | c45395_g1_i1 | 35                  |                               | 228                  | 4               | 0.00002             |                                      |                      |   |           |  |  |
| <u>Genus:</u><br><u>Chrysovirus</u>                                           | <i>Penicillium chrysogenum virus</i>          | c9510_g1_i1  | 54                  |                               | Hypothetical protein | 536             | 5.3                 | 1.73E-56                             | <i>Penicillium</i>   | 6 |           |  |  |
|                                                                               |                                               | c27061_g1_i1 | 54                  |                               |                      | 719             | 3.8                 | 4.59E-82                             |                      |   |           |  |  |
|                                                                               |                                               | c29121_g1_i1 | 59                  |                               |                      | 631             | 4.9                 | 1.97E-66                             |                      |   |           |  |  |
|                                                                               |                                               | c32979_g1_i1 | 40                  | 449                           |                      | 12              | 2.44E-22            |                                      |                      |   |           |  |  |
|                                                                               |                                               | c39328_g1_i1 | 80                  | 266                           |                      | 4.3             | 2.71E-21            |                                      |                      |   |           |  |  |
|                                                                               |                                               |              |                     | c19508_g1_i1                  |                      | 66              | 293                 | 5.5                                  |                      |   | 5.11E-33  |  |  |
|                                                                               |                                               |              |                     | c27836_g1_i1                  |                      | 77              | 245                 | 4.8                                  |                      |   | 2.11E-36  |  |  |
|                                                                               |                                               |              |                     | c29554_g1_i1                  |                      | 80              | 383                 | 4.7                                  |                      |   | 1.34E-69  |  |  |
|                                                                               |                                               |              |                     | c31457_g1_i1                  |                      | 81              | 393                 | 11                                   |                      |   | 2.26E-43  |  |  |
|                                                                               |                                               |              |                     | c37624_g1_i1                  |                      | 86              | 614                 | 7.3                                  |                      |   | 2.63E-127 |  |  |
|                                                                               |                                               | c45358_g1_i1 | 74                  | 208                           | 8.0                  | 3.77E-28        |                     |                                      |                      |   |           |  |  |
|                                                                               |                                               | c48709_g1_i1 | 77                  | 393                           | 6.0                  | 1.08E-65        |                     |                                      |                      |   |           |  |  |
|                                                                               |                                               | c53047_g1_i1 | 81                  | 243                           | 4.0                  | 4.49E-41        |                     |                                      |                      |   |           |  |  |
|                                                                               |                                               | c53928_g1_i1 | 78                  | 458                           | 4.2                  | 2.66E-82        |                     |                                      |                      |   |           |  |  |

|                                                      |                                                     |              |    |  |                        |      |     |          |                                    |            |
|------------------------------------------------------|-----------------------------------------------------|--------------|----|--|------------------------|------|-----|----------|------------------------------------|------------|
|                                                      |                                                     | c24059_g1_i1 | 52 |  | Capsid                 | 313  | 6.0 | 2.53E-27 |                                    |            |
|                                                      |                                                     | c50237_g1_i1 | 59 |  |                        | 391  | 4.4 | 1.73E-45 |                                    |            |
| <u>Genus:</u><br><u>Totivirus</u><br><u>dsRNA</u>    | <i>Scheffersomyces segobiensis virus L</i>          | c42138_g1_i1 | 61 |  | Polyprotein            | 440  | 4.2 | 4.50E-62 | <i>Scheffersomyces segobiensis</i> | 7          |
|                                                      |                                                     | c45664_g1_i1 | 51 |  |                        | 401  | 4.4 | 2.66E-36 |                                    |            |
|                                                      |                                                     | c28122_g1_i1 | 53 |  |                        | 369  | 5.0 | 3.30E-32 |                                    |            |
|                                                      |                                                     | c31620_g1_i1 | 52 |  | Polyprotein            | 321  | 4.9 | 7.69E-34 |                                    |            |
|                                                      |                                                     | c32294_g1_i1 | 52 |  |                        | 309  | 4.9 | 2.54E-28 |                                    |            |
|                                                      |                                                     | c33879_g1_i1 | 42 |  |                        | 403  | 4.8 | 1.34E-26 |                                    |            |
| <u>Genus:</u><br><u>Totivirus</u><br><u>dsRNA</u>    | <i>Ustilago maydis virus H1</i>                     | c37453_g1_i1 | 33 |  | Cap-pol fusion protein | 594  | 5.1 | 3.31E-6  | <i>Ustilago maydis</i>             | 8          |
|                                                      |                                                     | c42393_g1_i1 | 72 |  |                        | 205  | 6.0 | 3.62E-29 |                                    |            |
|                                                      |                                                     | c43689_g1_i1 | 80 |  |                        | 402  | 4.7 | 3.25E-69 |                                    |            |
|                                                      |                                                     | c51753_g1_i1 | 57 |  | Polyprotein            | 404  | 6.8 | 4.79E-50 |                                    |            |
| <u>Unclassified ourmia-like virus</u>                | <i>Rhizoctonia solani ourmia-like virus 1 RNA 1</i> | c6975_g1_i1  | 36 |  |                        | 1806 | 23  | 1.18E-53 | <i>Rhizoctonia solani</i>          | KP900922.1 |
|                                                      |                                                     | c13763_g1_i1 | 33 |  | RdRp                   | 747  | 23  | 2.04E-14 |                                    |            |
|                                                      |                                                     | c2560_g1_i1  | 38 |  |                        | 2481 | 189 | 1.21E-84 |                                    |            |
|                                                      |                                                     | c45380_g1_i1 | 56 |  |                        | 320  | 10  | 1.20E-18 |                                    |            |
| <u>Unclassified ourmia-like virus</u>                | <i>Botrytis ourmia-like virus</i>                   | c17358_g1_i1 | 30 |  | RdRp                   | 983  | 8.8 | 2.82E-16 | <i>Botrytis</i>                    | 9          |
| Family <i>Bunyaviridae</i> ssRNA(-)                  | <i>Fusarium poae negative-stranded virus 2</i>      | c8881_g1_i1  | 46 |  | RdRp                   | 6498 | 37  | 8e-58    | <i>Fusarium poae</i>               | 10         |
| <u>Genus:</u><br><u>Victorivirus</u><br><u>dsRNA</u> | <i>Ustilagoidea virens RNA virus M</i>              | c25256_g1_i1 | 35 |  | RdRp                   | 1070 | 7.1 | 2.69E-49 | <i>Ustilagoidea virens</i>         | 11         |
|                                                      |                                                     | c51155_g1_i1 | 44 |  |                        | 357  | 12  | 3.80E-23 |                                    |            |

### Mycoviruses from Bangkok *Ae aegypti*

| Classification                                           | Virus or nearest match                              | Contig id    | Amino acid identity | Gene | Length (nucleotide) | Mean read depth | E Data ncbi protein | Host                      | Refs |
|----------------------------------------------------------|-----------------------------------------------------|--------------|---------------------|------|---------------------|-----------------|---------------------|---------------------------|------|
| <b>Mycoviruses</b>                                       |                                                     |              |                     |      |                     |                 |                     |                           |      |
| <u>Family:</u><br><u>Ophioviridae</u><br><u>ssRNA(-)</u> | <i>Rhizoctonia solani negative-stranded virus 1</i> | c31623_g1_i1 | 31                  | RdRp | 3076                | 55              | 9.88E-76            | <i>Rhizoctonia solani</i> | 12   |
| <u>Family:</u><br><u>Ophioviridae</u>                    | <i>Rhizoctonia solani negative-stranded virus 3</i> | c26658_g1_i1 | 29                  | RdRp | 2239                | 54              | 8.66E-11            | <i>Rhizoctonia solani</i> | 12   |
| Family <i>Bunyaviridae</i> ssRNA(-)                      | <i>Fusarium poae negative-stranded virus 2</i>      | c35704_g1_i1 | 26                  | RdRp | 7947                | 103             | 3.35E-118           | <i>Fusarium poae</i>      | 10   |
|                                                          |                                                     | c12670_g1_i1 | 25                  |      | 1492                | 39              | 2.47E-13            |                           |      |

### References

- Wang, L. *et al.* Hypovirulence of the phytopathogenic fungus *Botryosphaeria dothidea*: association with a coinfecting chrysovirus and a partitivus. *J Virol* **88**, 7517-7527 (2014).
- Zhong, J. *et al.* Complete genome sequence and organization of a novel virus from the rice false smut fungus *Ustilagoidea virens*. *Virus Genes* **48**, 329-333 (2014).
- Cook, S. *et al.* Novel virus discovery and genome reconstruction from field RNA samples reveals highly divergent viruses in dipteran hosts. *PLoS One* **8**, e80720 (2013).
- Herrero, N. & Zabalgoitia, I. Mycoviruses infecting the endophytic and entomopathogenic fungus *Tolypocladium cylindrosporum*. *Virus Res* **160**, 409-413 (2011).
- Urayama, S. *et al.* A dsRNA mycovirus, *Magnaporthe oryzae* chrysovirus 1-B, suppresses vegetative growth and development of the rice blast fungus. *Virology* **448**, 265-273 (2014).
- Jiang, D. & Ghabrial, S. A. Molecular characterization of *Penicillium chrysogenum* virus: reconsideration of the taxonomy of the genus *Chrysovirus*. *J Gen Virol* **85**, 2111-2121 (2004).
- Taylor, D. J., Ballinger, M. J., Bowman, S. M. & Bruenn, J. A. Virus-host co-evolution under a modified nuclear genetic code. *PeerJ* **1**, e50 (2013).
- Voth, P. D., Mairura, L., Lockhart, B. E. & May, G. Phylogeography of *Ustilago maydis* virus H1 in the USA and Mexico. *J Gen Virol* **87**, 3433-3441 (2006).
- Donaire, L., Rozas, J. & Ayllon, M. A. Molecular characterization of *Botrytis ourmia-like* virus, a mycovirus close to the plant pathogenic genus *Ourmiavirus*. *Virology* **489**, 158-164 (2016).
- Osaki, H., Sasaki, A., Nomiya, K. & Tomioka, K. Multiple virus infection in a single strain of *Fusarium poae* shown by deep sequencing. *Virus Genes* (2016).
- Zhang, T., Jiang, Y., Huang, J. & Dong, W. Complete genome sequence of a putative novel victorivirus from *Ustilagoidea virens*. *Arch Virol* **158**, 1403-1406 (2013).
- Marzano, S. Y. *et al.* Identification of Diverse Mycoviruses through Metatranscriptomics Characterization of the Viromes of Five Major Fungal Plant Pathogens. *J Virol* **90**, 6846-6863 (2016).

**Table S5. Mapping of reads to the human genome.** All trimmed and quality-controlled reads (before ribosomal filter) were mapped to the human reference genome (ensemble release 75) using STAR v2.5.2a. Genes were derived based on the genome coordinates. In total, 8646 reads from the Cairns and 8744 reads from the Bangkok dataset matched a human gene. Below is a table listing the number of reads matching human genes. Only genes that have at least 5 reads in both datasets (63 genes) are listed. In total, 327 genes were identified that had at least 5 reads in either of the two datasets.

| Gene                                                                                                                                           | Bangkok | Cairns |
|------------------------------------------------------------------------------------------------------------------------------------------------|---------|--------|
| ENSG00000266658 RNA28S5:"RNA, 28S ribosomal 5 [Source:HGNC Symbol;Acc:37659]"                                                                  | 1646    | 4109   |
| ENSG00000210082 MT-RNR2:mitochondrially encoded 16S RNA [Source:HGNC Symbol;Acc:7471]                                                          | 118     | 986    |
| ENSG00000211459 MT-RNR1:mitochondrially encoded 12S RNA [Source:HGNC Symbol;Acc:7470]                                                          | 34      | 600    |
| ENSG00000244734 HBB:"hemoglobin, beta [Source:HGNC Symbol;Acc:4827]"                                                                           | 417     | 126    |
| ENSG00000188536 HBA2:"hemoglobin, alpha 2 [Source:HGNC Symbol;Acc:4824]"                                                                       | 394     | 85     |
| ENSG00000206172 HBA1:"hemoglobin, alpha 1 [Source:HGNC Symbol;Acc:4823]"                                                                       | 351     | 87     |
| ENSG00000258486 RN7SL1:"RNA, 7SL, cytoplasmic 1 [Source:HGNC Symbol;Acc:10038]"                                                                | 280     | 60     |
| ENSG00000150991 UBC:ubiquitin C [Source:HGNC Symbol;Acc:12468]                                                                                 | 57      | 234    |
| ENSG00000170315 UBB:ubiquitin B [Source:HGNC Symbol;Acc:12463]                                                                                 | 111     | 173    |
| ENSG00000265150 RN7SL2:"RNA, 7SL, cytoplasmic 2 [Source:HGNC Symbol;Acc:23134]"                                                                | 128     | 18     |
| ENSG00000226958 CTD-2328D6.1:                                                                                                                  | 16      | 87     |
| ENSG00000184009 ACTG1:"actin, gamma 1 [Source:HGNC Symbol;Acc:144]"                                                                            | 62      | 41     |
| ENSG00000143632 ACTA1:"actin, alpha 1, skeletal muscle [Source:HGNC Symbol;Acc:129]"                                                           | 49      | 52     |
| ENSG00000263563 UBBP4:ubiquitin B pseudogene 4 [Source:HGNC Symbol;Acc:12467]                                                                  | 29      | 63     |
| ENSG00000258947 TUBB3:Tubulin beta-3 chain [Source:UniProtKB/Swiss-Prot;Acc:Q13509]                                                            | 16      | 60     |
| ENSG00000263740 RN7SL4P:"RNA, 7SL, cytoplasmic 4, pseudogene [Source:HGNC Symbol;Acc:10039]"                                                   | 54      | 17     |
| ENSG00000265735 RN7SL5P:"RNA, 7SL, cytoplasmic 5, pseudogene [Source:HGNC Symbol;Acc:10040]"                                                   | 46      | 17     |
| ENSG00000147454 SLC25A37:"solute carrier family 25 (mitochondrial iron transporter), member 37 [Source:HGNC Symbol;Acc:29786]"                 | 55      | 8      |
| ENSG00000107796 ACTA2:"actin, alpha 2, smooth muscle, aorta [Source:HGNC Symbol;Acc:130]"                                                      | 22      | 40     |
| ENSG00000234289 H2BFS:"H2B histone family, member S (pseudogene) [Source:HGNC Symbol;Acc:4762]"                                                | 22      | 34     |
| ENSG00000265401 RP11-138I1.4:                                                                                                                  | 20      | 33     |
| ENSG00000132475 H3F3B:"H3 histone, family 3B (H3.3B) [Source:HGNC Symbol;Acc:4765]"                                                            | 13      | 35     |
| ENSG00000197409 HIST1H3D:"histone cluster 1, H3d [Source:HGNC Symbol;Acc:4767]"                                                                | 12      | 34     |
| ENSG00000221983 UBA52:ubiquitin A-52 residue ribosomal protein fusion product 1 [Source:HGNC Symbol;Acc:12458]                                 | 38      | 7      |
| ENSG00000152234 ATP5A1:"ATP synthase, H+ transporting, mitochondrial F1 complex, alpha subunit 1, cardiac muscle [Source:HGNC Symbol;Acc:823]" | 26      | 18     |
| ENSG00000075624 ACTB:"actin, beta [Source:HGNC Symbol;Acc:132]"                                                                                | 18      | 25     |
| ENSG00000202198 RN7SK:"RNA, 7SK small nuclear [Source:HGNC Symbol;Acc:10037]"                                                                  | 37      | 5      |
| ENSG00000241838 LA16c-3G11.7:                                                                                                                  | 11      | 27     |
| ENSG00000203852 HIST2H3A:"histone cluster 2, H3a [Source:HGNC Symbol;Acc:20505]"                                                               | 9       | 25     |
| ENSG00000204434 POTEK:"POTE ankyrin domain family, member K, pseudogene [Source:HGNC Symbol;Acc:30182]"                                        | 19      | 15     |
| ENSG00000180139 ACTA2-AS1:ACTA2 antisense RNA 1 [Source:HGNC Symbol;Acc:45169]                                                                 | 11      | 20     |
| ENSG00000147403 RPL10:ribosomal protein L10 [Source:HGNC Symbol;Acc:10298]                                                                     | 18      | 13     |
| ENSG00000197903 HIST1H2BK:"histone cluster 1, H2bk [Source:HGNC Symbol;Acc:13954]"                                                             | 13      | 17     |
| ENSG00000104765 BNIP3L:BCL2/adenovirus E1B 19kDa interacting protein 3-like [Source:HGNC Symbol;Acc:1085]                                      | 23      | 7      |
| ENSG00000180596 HIST1H2BC:"histone cluster 1, H2bc [Source:HGNC Symbol;Acc:4757]"                                                              | 8       | 18     |

|                                                                                                                                |    |    |
|--------------------------------------------------------------------------------------------------------------------------------|----|----|
| ENSG00000170889 RPS9:ribosomal protein S9 [Source:HGNC Symbol;Acc:10442]                                                       | 10 | 15 |
| ENSG00000203811 HIST2H3C:"histone cluster 2, H3c [Source:HGNC Symbol;Acc:20503]"                                               | 8  | 17 |
| ENSG00000196176 HIST1H4A:"histone cluster 1, H4a [Source:HGNC Symbol;Acc:4781]"                                                | 10 | 15 |
| ENSG00000197616 MYH6:"myosin, heavy chain 6, cardiac muscle, alpha [Source:HGNC Symbol;Acc:7576]"                              | 14 | 10 |
| ENSG00000207507 RNU6-9:"RNA, U6 small nuclear 9 [Source:HGNC Symbol;Acc:34269]"                                                | 11 | 13 |
| ENSG00000230037 UBBP1:ubiquitin B pseudogene 1 [Source:HGNC Symbol;Acc:12464]                                                  | 6  | 17 |
| ENSG00000137285 TUBB2B:"tubulin, beta 2B class IIb [Source:HGNC Symbol;Acc:30829]"                                             | 12 | 10 |
| ENSG00000188229 TUBB4B:"tubulin, beta 4B class IVb [Source:HGNC Symbol;Acc:20771]"                                             | 10 | 12 |
| ENSG00000109971 HSPA8:heat shock 70kDa protein 8 [Source:HGNC Symbol;Acc:5241]                                                 | 8  | 14 |
| ENSG00000184779 RPS17:ribosomal protein S17 [Source:HGNC Symbol;Acc:10397]                                                     | 16 | 5  |
| ENSG00000104904 OAZ1:ornithine decarboxylase antizyme 1 [Source:HGNC Symbol;Acc:8095]                                          | 14 | 6  |
| ENSG00000187537 POTE:"POTE ankyrin domain family, member M [Source:HGNC Symbol;Acc:37096]"                                     | 6  | 14 |
| ENSG00000083845 RPS5:ribosomal protein S5 [Source:HGNC Symbol;Acc:10426]                                                       | 6  | 12 |
| ENSG00000126803 HSPA2:heat shock 70kDa protein 2 [Source:HGNC Symbol;Acc:5235]                                                 | 10 | 8  |
| ENSG00000272055 RNU6-6P:"RNA, U6 small nuclear 6, pseudogene [Source:HGNC Symbol;Acc:10228]"                                   | 10 | 8  |
| ENSG00000142534 RPS11:ribosomal protein S11 [Source:HGNC Symbol;Acc:10384]                                                     | 12 | 5  |
| ENSG00000206932 RNU6-4P:"RNA, U6 small nuclear 4, pseudogene [Source:HGNC Symbol;Acc:34253]"                                   | 7  | 10 |
| ENSG00000110955 ATP5B:"ATP synthase, H+ transporting, mitochondrial F1 complex, beta polypeptide [Source:HGNC Symbol;Acc:830]" | 6  | 11 |
| ENSG00000127824 TUBA4A:"tubulin, alpha 4a [Source:HGNC Symbol;Acc:12407]"                                                      | 9  | 8  |
| ENSG00000156508 EEF1A1:eukaryotic translation elongation factor 1 alpha 1 [Source:HGNC Symbol;Acc:3189]                        | 9  | 8  |
| ENSG00000196374 HIST1H2BM:"histone cluster 1, H2bm [Source:HGNC Symbol;Acc:4750]"                                              | 6  | 9  |
| ENSG00000100316 RPL3:ribosomal protein L3 [Source:HGNC Symbol;Acc:10332]                                                       | 9  | 6  |
| ENSG00000143947 RPS27A:ribosomal protein S27a [Source:HGNC Symbol;Acc:10417]                                                   | 8  | 7  |
| ENSG00000123091 RNF11:ring finger protein 11 [Source:HGNC Symbol;Acc:10056]                                                    | 8  | 6  |
| ENSG00000207357 RNU6-2:"RNA, U6 small nuclear 2 [Source:HGNC Symbol;Acc:34270]"                                                | 7  | 7  |
| ENSG00000197697 HIST1H2BE:"histone cluster 1, H2be [Source:HGNC Symbol;Acc:4753]"                                              | 5  | 8  |
| ENSG00000206899 RNU6-36P:"RNA, U6 small nuclear 36, pseudogene [Source:HGNC Symbol;Acc:34280]"                                 | 5  | 7  |
| ENSG00000137267 TUBB2A:"tubulin, beta 2A class IIa [Source:HGNC Symbol;Acc:12412]"                                             | 5  | 5  |



**Table S6. Mapping of reads to other chordates.** Chordate reads that did not match human sequences (see Fig. 1) were used to search for matches in the nucleotide database. Non *homo sapiens* matches with at least 95% identity and 95% coverage are included. For Bangkok 190 reads mapped to mice/rat genes, for Cairns 79 reads mapped to mice/rat genes. For Bangkok 5 reads mapped to dog genes. For Bangkok 1 read mapped to cow, for Cairns 1 read mapped to cow. The closest *Homo sapiens* genes are included for a random selection of reads and are highlighted in grey.

**Bangkok (Mouse/rat)**

CTCCAAAGCTATCAAAGTACCGCTGGGTCCAAGGGTAGACAACCAGCAGCCTGCCAGGGCCTCACCACCA  
ACTTCATCGGCGTTCACCTTTCCCCACAGGCCAGAGACAGCAGCCTTCTCAGCATCAGTCAGGTGCACCAT  
GATGTCTG

Mus musculus hemoglobin, beta adult t chain (Hbb-bt), mRNA

Sequence ID: NM\_008220.5

Identities: 150/150(100%) Gaps: 0/150(0%)

```
Query 1 CTCCAAAGCTATCAAAGTACCGCTGGGTCCAAGGGTAGACAACCAGCAGCCTGCCAGGG 60
      |||
Sbjct 196 CTCCAAAGCTATCAAAGTACCGCTGGGTCCAAGGGTAGACAACCAGCAGCCTGCCAGGG 137

Query 61 CCTCACCACCAACTTCATCGGCGTTCACCTTTCCCCACAGGCCAGAGACAGCAGCCTTCT 120
      |||
Sbjct 136 CCTCACCACCAACTTCATCGGCGTTCACCTTTCCCCACAGGCCAGAGACAGCAGCCTTCT 77

Query 121 CAGCATCAGTCAGGTGCACCATGATGTCTG 150
      |||
Sbjct 76 CAGCATCAGTCAGGTGCACCATGATGTCTG 47
```

**Homo sapiens hemoglobin subunit beta (HBB), mRNA**

Sequence ID: NM\_000518.4

Identities: 128/148(86%) Gaps: 0/148(0%)

```
Query 3 CCAAAGCTATCAAAGTACCGCTGGGTCCAAGGGTAGACAACCAGCAGCCTGCCAGGGCC 62
      |||
Sbjct 190 CCAAAGGACTCAAAGAACCCTCTGGGTCCAAGGGTAGACCACCAGCAGCCTGCCAGGGCC 131

Query 63 TCACCACCAACTTCATCGGCGTTCACCTTTCCCCACAGGCCAGAGACAGCAGCCTTCTCA 122
      |||
Sbjct 130 TCACCACCAACTTCATCCACGTTACCTTGCCCCACAGGGCAGTAACGGCAGACTTCTCC 71

Query 123 GCATCAGTCAGGTGCACCATGATGTCTG 150
      ||
Sbjct 70 TCAGGAGTCAGATGCACCATGGTGTCTG 43
```

GGGGCCAGCTCCAAGGTGTGCTTCTCATTAGTATACTCCACAGTGCCACCCTTGCCAGGTCCCTTTGGAA  
ATTCCAGGTAAAGCGCAGTGTAATGTCGGCTGTGCCGTTGTACAGCTCCTGCTTCATCTGGGCTCGGCTGG  
GTGGGCTG

**PREDICTED: Mus musculus piezo-type mechanosensitive ion channel component 1 (Piezo1), transcript variant X6, mRNA**

Identities: 150/150(100%) Gaps: 0/150(0%)

```
Query 1 GGGGCCAGCTCCAAGGTGTGCTTCTCATTAGTATACTCCACAGTGCCACCCTTGCCAGG 60
      |||
Sbjct 5458 GGGGCCAGCTCCAAGGTGTGCTTCTCATTAGTATACTCCACAGTGCCACCCTTGCCAGG 5399

Query 61 TCCCTTTGGAAATTCAGGTAAGCGCAGTGTAATGTCGGCTGTGCCGTTGTACAGCTCC 120
      |||
Sbjct 5398 TCCCTTTGGAAATTCAGGTAAGCGCAGTGTAATGTCGGCTGTGCCGTTGTACAGCTCC 5339

Query 121 TGCTTCATCTGGGCTCGGCTGGGTGGGCTG 150
      |||
Sbjct 5338 TGCTTCATCTGGGCTCGGCTGGGTGGGCTG 5309
```

**Homo sapiens piezo type mechanosensitive ion channel component 1 (PIEZO1), mRNA**

Sequence ID: NM\_001142864.3

Identities: 129/150(86%) Gaps: 0/150(0%)

```

Query 1 GGGGCCAGCTCCAAGGTGTGCTTCTCATTAGTATACTCCACAGTGCCACCCTGGCCAGG 60
      ||||| ||| ||||| ||| | ||||| ||||| ||||| ||||| |||||
Sbjct 7245 GGGGCCAGGGCCAGCATGTGCTTCTCGTTGGCATACTCCACAGTGCCTCCCTTCGCCAGG 7186

Query 61 TCCCTTTGGAATTCAGGTAAGCGCAGTGAATGTCGGCTGTGCCGTTGTACAGCTCC 120
      ||||| ||||| ||||| ||||| ||||| ||| | ||||| ||||| ||||| |||||
Sbjct 7185 TCCCTCTGGAAGTTCAGGTAAGCGCAGGGTGATGTCGGCCGTGCCGTTGTAGAGCTCC 7126

Query 121 TGCTTCATCTGGGCTCGGCTGGGTGGGCTG 150
      ||||| ||||| ||||| ||| |
Sbjct 7125 CGCTTCATCTGGGCACGGCTGGGGGACTG 7096

```

CTCAGACTCAAATATCTTGGCCATATATCTAGGCTCTACTCTGACTANATCATGACTCACANAACCCAATT  
ATTTTAACCTACACTCNGCCCCGTGGCGGGTTCCTGTGCTCATG

**Mus musculus targeted non-conditional, lacZ-tagged mutant allele**

**Siah2:tm1e(EUCOMM)Hmgu; transgenic**

**Sequence ID: JN948870.1**

**Identities: 113/116(97%) Gaps: 0/116(0%)**

```

Query 1 CTCAGACTCAAATATCTTGGCCATATATCTAGGCTCTACTCTGACTANATCATGACTCAC 60
      ||||| ||||| ||||| ||||| ||||| ||||| ||||| ||||| ||||| |||||
Sbjct 5625 CTCAGACTCAAATATCTTGGCCATATATCTAGGCTCTACTCTGACTAGATCATGACTCAC 5566

Query 61 ANAACCAATTATTTTAACCTACACTCNGCCCCGTGGCGGGTCCCTGTGCTCATG 116
      | ||||| ||||| ||||| ||||| ||||| ||||| ||||| ||||| |||||
Sbjct 5565 ACAACCAATTATTTTAACCTACACTCTGCCCGTGGCGGGTCCCTGTGCTCATG 5510

```

**Homo sapiens chromosome 2, alternate assembly CHM1\_1.1**

**Sequence ID: NC\_018913.2**

**Identities: 24/26(92%) Gaps: 0/26(0%)**

```

Query 8 TCAAATATCTTGGCCATATATCTAGG 33
      ||||| ||||| ||||| |||
Sbjct 84754503 TCAATTATCTTGGCCATATATCTGGG 84754478

```

GGCAATAACTGACAGATGCTCTCTTGGGAACAATTAACCATTTGTTACAGGCAAGAGCAGGAAAGGGGGTT  
TAGTGGTACTTGTGAGCCAGGGCAGCGGCCACTCCAGCCACCACCTTCTGGAAGGCAGCCTGTGCAGCGGG  
GGTGAAAT

**Mus musculus hemoglobin, beta adult s chain (Hbb-bs), mRNA**

**Sequence ID: NM\_001201391.1**

**Identities: 147/148(99%) Gaps: 0/148(0%)**

```

Query 3 CAATAACTGACAGATGCTCTCTTGGGAACAATTAACCATTTGTTACAGGCAAGAGCAGGA 62
      ||| ||||| ||||| ||||| ||||| ||||| ||||| ||||| ||||| |||||
Sbjct 565 CAACAACCTGACAGATGCTCTCTTGGGAACAATTAACCATTTGTTACAGGCAAGAGCAGGA 506

Query 63 AAGGGGGTTTAGTGGTACTTGTGAGCCAGGGCAGCGGCCACTCCAGCCACCACCTTCTGG 122
      ||||| ||||| ||||| ||||| ||||| ||||| ||||| ||||| ||||| |||||
Sbjct 505 AAGGGGGTTTAGTGGTACTTGTGAGCCAGGGCAGCGGCCACTCCAGCCACCACCTTCTGG 446

Query 123 AAGGCAGCCTGTGCAGCGGGGGTGAAT 150
      ||||| ||||| ||||| |||||
Sbjct 445 AAGGCAGCCTGTGCAGCGGGGGTGAAT 418

```

**Homo sapiens hemoglobin subunit beta (HBB), mRNA**

**Sequence ID: NM\_000518.4**

**Identities: 75/93(81%) Gaps: 0/93(0%)**

```

Query 56 AGCAGGAAAGGGGGTTTAGTGGTACTTGTGAGCCAGGGCAGCGGCCACTCCAGCCACCAC 115
      ||||| ||||| | | ||||| ||||| ||||| ||||| ||||| ||||| |||||
Sbjct 509 AGCAAGAAAGCGAGCTTAGTGATACTTGTGGGCCAGGGCATTAGCCACACCAGCCACCAC 450

Query 116 CTTCTGGAAGGCAGCCTGTGCAGCGGGGGTGAAT 148
      ||||| ||||| ||||| ||| |
Sbjct 449 TTTCTGATAGGCAGCCTGCACCTGGTGGGGTGAAT 417

```

GCCAGGGCAGCGGCCACTCCAGCCACCACCTTCTGGAAGGCAGCCTGTGCAGCGGGGGTGAATCCTTGCC  
CAGGTGGTGGCCAGCAATCACGATCATATTGCCAGGAGCCTGAAGTTCTCAGGATCCACATGCAGCT  
TGTCACAG

**TPA\_inf: Mus musculus Glna1 gene for globin a1**

**Sequence ID: LT548150.1**







GGAAATTTCTATTCCAACGGTAACTTGACATTACTCTTGTGAATCCATAAGGATGAGCCAACATAAATCCA  
ACAGCCATTTTATACATTCTAGCATCCCAGAATGTCAGGATGGATGATCCTCCAGCACCATGTCCTCGCTG  
ATTATC  
>DB7DT8Q1:335:H7TWNBCXX:1:2102:20267:92440/1  
CTATCAGTTCAATTCAAGTCACGAAGGTAATGATTTTTGTATCCTAAACATCCACACTTTCCCGTCCTT  
GAGAGAACATTTATGCTCTCCTGCCTTGCTTCTTAC  
>DB7DT8Q1:335:H7TWNBCXX:1:2103:13894:36646/1  
CTCCGCTGTCCGCTCTCCGTGGACCTTATTGTCTCTCGTGC GGATGTTACCGTGCCACTGGCTTTCTCTT  
TTTCACAACAACAAGGATGAAGTTACTGTGCTAACTGTGCGTTTCTGATCTTCTTATCAAGGTACAGC  
CTGGATCCAGG  
>DB7DT8Q1:335:H7TWNBCXX:1:2105:14331:20671/1  
CAGAATGATATTTAATTAAGAAAAAATTCACATAGTGAATTAATTCTCAAAGTTGTGACTATATCATT  
TCACTAAAACCACTGACAGCATGTGAAGAAC  
>DB7DT8Q1:335:H7TWNBCXX:1:2113:6309:69723/1  
TGATGACCTCCGCATCCCATCCGTGAGTGTGCGCTGCTTCCCAATCACAGCATAGCCATTCAGATGTACA  
TCATTTCCAGAGCAGGGATCGGCAAGGAGATGGGGTTGGGGTGAGTTATCGCCTGGACTTCCGGATAGCA  
AACTTCTCTTTGGGTAGAGATTTCCAGCAATCTTGAGCTTCAAG  
>DB7DT8Q1:335:H7TWNBCXX:1:2114:20249:12454/1  
TGACATTTTGTGTTGGGAGCAGACGGCCTGGACATCTGCCAAGGGCTCATGCACGAAGGTGTTACGGGCTTG  
CATGACCCATTTGTCATAACCCGGCGTTTCATCATTTGGTTGCAGTAGGTGGG  
>DB7DT8Q1:335:H7TWNBCXX:1:2213:12022:7981/1  
CACAAGTAGTGTCTGCATTAATGGTCACTTCTTTTGTAAATCCATTGTTATTGGGTGGTCCAATCCAGTCA  
TTCTGATCTTTTCCATTCTGGAAATTTCTATTCCAACGGTAACTTGACATTACTCTTGTGAATCCATAAGG  
ATGAG  
>DB7DT8Q1:335:H7TWNBCXX:1:1103:14461:85528/1  
GGCAATGGTCTCCTCAATCCAATCAATGAAGGCTGAGACACGGGTGAACACTGTGGGCTTCTCAGGGTGT  
TGCAGCCCAAGGAGGACACAAAAGCTGGTCACAC  
>DB7DT8Q1:335:H7TWNBCXX:1:1106:18271:50581/1  
ATCTCTGGTCAGCTTCCACATGATGATGGTCTTGTCTCGAGACGCAGACAGGATCATGTCCGGAACTGCG  
GTGTGGTGGCGATCTGTGTTACCCATCCATTGTGGCACTTAAGGGTCCC CGAAGGGTCATCTGCTCGGTC  
ATGGCTGCA  
>DB7DT8Q1:335:H7TWNBCXX:1:1205:9059:22981/1  
AAAATTTATTTATACAGCCAAAAGAAATGTAGACAATTAATTTGGGAGGTGGCTTGTAAGAGAACAGCAAAG  
AGTAAGACTGAAGGCTTTGCTTGGTATTTATAATCAGTGTATCAATTTTGAAGAAG  
>DB7DT8Q1:335:H7TWNBCXX:1:1205:8228:84018/1  
AAAAGACACAGTGTGGTCTCCTCGGGGTCCTGAGTTATATTTTCTTGGCTAGATAACGAACTCTGTATGTGT  
AAGGACCTCTTTGTTAACCTTGATTTGCTGCTGTTCTTTGCCACGTCATCTGGGTTTGCACATCAAAG  
>DB7DT8Q1:335:H7TWNBCXX:1:1210:5910:31619/1  
ATCAACTTGCTGCTATGAGCAAGAATCTCAATATCAGACTGCCAGGTACAAATCCCAGCTTGCCTCAGCTC  
TGTGTGATCTCAAGCAAGCAACTTCTCGGGCCTCAGTTTCCGCTCTGAAAAAA  
>DB7DT8Q1:335:H7TWNBCXX:1:1211:2112:27274/1  
CTAAAAGCTACTTGGTTGCTGTTATATCCCACCAGTTTGA AAAAGGCTGACCATTGACCACATTCCTGAA  
GGCAACCATGTTTCTGATTTGACGCCATCTGTGTTACAGACCCAGTCATTGCCACAAGTAGTGTCTGC  
>DB7DT8Q1:335:H7TWNBCXX:1:1214:15277:12688/1  
GGGGAAGCTAGCAAACATCCTTTCCAGGGCTTCCAGCTCCATATTCAGCACCATGGCCACCAATCTTCCCC  
AGGCAGCCTTGATGTTGCTTTTGTCTTCCCCAGAGAGCACCATGGTTT  
>DB7DT8Q1:335:H7TWNBCXX:1:1214:15119:99237/1  
CATTGACCACATTCCTGAAGGCAACCATATTCCTGATTTGACGCCATCTGTGTTACAGACCCAGTCATTG  
CCACAAGTAGTGTCTGCATTAATG  
>DB7DT8Q1:335:H7TWNBCXX:1:1215:3017:49689/1  
GGGAAGATAATGCAAGATAATGATTGATACAGATAGACAGACAGATATGTAGATGATAGACTGATAG  
ATGATAAATGGATAATAAATAAAGATAATTGATTGATAGACATCTGATATGCATACAGAGATGAGAGAAA  
GAGATGATGGAT  
>DB7DT8Q1:335:H7TWNBCXX:1:2109:19484:78572/1  
CTTGTACCATGTCTCTGAATTCATCTTCAATTTCCAGACCTTGTGCAGATTTTATAGCTGATTGGTTGGTA  
TCTTTCCACCAAGGTCTTGATGGGTTATGAACTACAACGTTTT  
>DB7DT8Q1:335:H7TWNBCXX:1:2113:9421:74485/1

CTTGGTGCCATGCAGAGTGGAAAAGCTCCTTTGCTGCACCTTTCACCAGGGCATTTCAGCTCCTCATAGTTCT  
CGGGCAGCTTATAGTCGTAGGAGTAAGGATAGAGCATCATCTGTGAGTAGGAGTGGACGGGCAGATAGGCC  
TTGATGGAGGAGAG  
>DB7DT8Q1:335:H7TWNBCXX:1:2115:3674:64300/1  
AGGGAAGTAGGTCTTGGTGGTGGGGAAGCTAGCAAACATCCTTTCAGGGCTTCAGCTCCATATTCAGCAC  
CATGGCCACCAATCTTCCCCCAGGCAGCCTTGATGTTGCTT  
>DB7DT8Q1:335:H7TWNBCXX:1:2203:17211:64363/1  
CACGACATATAGCAAGAAAAACACGAGGGAAAACCTTGTGGCAGGAAAGAGAAAGCCTGACAAAATGCTTA  
AAAAGATATCCTGACAAGGAATGCAATCCTGGCAGGAAGCCTGGTAAAGGTGAG  
>DB7DT8Q1:335:H7TWNBCXX:1:2214:4980:60420/1  
GTTACCAAGAGATCACATTGTGTCTGAGTTTTACAAGCAAGAGAGTGAGCAGGATGTCTTCTCTCACGG  
TCTCTTACTACAGAAGTTGTGCTCTGCCGCTCCTCCCCCTTTTGCACAGTGATCT  
>DB7DT8Q1:335:H7TWNBCXX:1:1107:8750:72066/1  
CATACCTTTAATCCCAGCACTTGGGAAGCAGAAACAGGTGGATCTGGGTGAGTTCAAGGCCAGCCTGCTCT  
ACAAAGTGATTTCCAGATCTCATAACAGAGATCCTGTCTCAAAAAATAAAAAATAAAAAACAACTAAGAGT  
GTAAACAGAGTAGAAGGGCTGGGGGAAGGAAGGGTACACAGGCAAGTAATTAATACCCCAGGAGAGCA  
GTCC  
>DB7DT8Q1:335:H7TWNBCXX:1:1115:8712:79654/1  
CGAAAACTAAGTATTTGCTCAGATCCAGACAGCTGGGGCAGTCTGCCGCCAGAGTATAATGGCAAAGCAG  
CTGTAGGTTACAGAGGCAGACATCCTCCTGAGAGGTCCGCCAGCGAAATATTGGAGACCAAGGGTTCCCC  
AACTCCAGCTCGGAACAGCTTGACCCACCCTGGAGTCCCC  
>DB7DT8Q1:335:H7TWNBCXX:1:1111:2379:40745/1  
CCGCCTTCTCCAATCTCCTTTGAGCCCCACTCAACCAATGAGCTTCAGGACAAGCCTGCTGGCACAGCCAG  
ACATGAACTTGACACAGTTTTTACAAGATGGATCCTCACCTCCTTGGCACCAACACAGAACCACAGCGGC  
CTGTCACCATGCATGGAACGGTG  
>DB7DT8Q1:335:H7TWNBCXX:1:1202:2314:49980/1  
CTCTGTGTGTAGCTGTCAAGAAGGAAGTTTCTCTTTGTTTTAGGTCTTACCTCACTGTACCATTACCCTGC  
CCTGCGTCTGTGTCTGCTGGCTGTAAAGTGGTCATCATAATGCATTTTAC  
>DB7DT8Q1:335:H7TWNBCXX:1:1209:17766:100451/1  
ATACATTCTAGCATCCCAGAATGTCAGGATGGATGATCCTCCAGCACCATGTCTCCTGATTATCATGGTT  
GTCCACAAACACAAGGGCTCTGTGAGAAGGCACCAAAACCCCAACCTTCTCCCCAGTTCTTTAAATAGGACA  
TCTTCTCGCCATTCCTTGGC  
>DB7DT8Q1:335:H7TWNBCXX:1:2104:19436:92690/1  
GTGTGTGCGTACTTTCATTGCTCAATTCATTAAGCTCTCTATTCTTGATTTACTACTAAATCCTCCTTAGT  
CATTTAGTTTCATAAAGGGTATAGTAATGTTCTTT  
>DB7DT8Q1:335:H7TWNBCXX:1:2110:18323:6437/1  
CTTTAATTGCCTCACCACCCAGATCAATGACCTCTTGGAAAATGAAAGGTCTGCTTCCTTGGGAGAACCAT  
TTTGTATTGAGATTATGCAGTTTGTCCAAACTGCCTTTATGTCTCCAGGCCACATGTGCTTAG  
>DB7DT8Q1:335:H7TWNBCXX:1:2114:17772:91850/1  
CTTACATCAAAGTGAGGGAAGTAGGTCCTGGTGGTGGGGAAGCTAGCAAACATCCTTTCAGGGCTTCAGC  
TCCATATTCAGCACCATGGCCACCAATCTTCCCCAGGCAGCCTTGATGTTGCTTTTGTCTTCCCCAGAGA  
GCACCATGGTTT  
>DB7DT8Q1:335:H7TWNBCXX:1:2203:18248:43865/1  
TGGTAGAGTCTGCTTGTTTTCCCAGGATATCTGTGAGCGTAATGACCCATCTGGGGGCATCCTCCACTCCC  
ACATGGGAAGCACTTATTTGCCGTGAAAAGACTGTAAGAGCTACAGGAGAACCCAGCAAAGCCAGTTGGGT  
TGACGATGCTG  
>DB7DT8Q1:335:H7TWNBCXX:1:2208:11180:43129/1  
CAGTGACTCTCTTAGAAACAAGGTCTGGATTATCATTGGCAACTTGTGTAATCCATGCCTCTATCGTTTCC  
CAGTTGTTGTACTTGGTGTAGCTGTGTCCACTTGCACGGGTGTGGC  
>DB7DT8Q1:335:H7TWNBCXX:1:2212:4178:69279/1  
GCCCTTGCATCGAGAGGACCTACACAGTTTACGATTTGGAAGATCGGTCATATTCTCCAAAACGACAAA  
GTGGCGTCCAGGCGTGACTTGGCAGTGGGCAGCCG  
>DB7DT8Q1:335:H7TWNBCXX:1:2215:8024:11113/1  
ATCGATGTCTTGGTATTGTGCAATATCCATGCTGGCCATGAAAAGCTTACCAAAAACATAATTGATATCCTT  
AACTTTTAAAACTGAATATTACAGTGCATTATGCAAAATGGTGTATAAGGAACCAATGACTTCTTATGAT  
GCCAGGAATAATATGCTTCAAAGCAGTAGACATT  
>DB7DT8Q1:335:H7TWNBCXX:1:1102:11220:13383/1

TATCCCTTTTACTCAATTATACTGGTGGTAGTTTTACTCGACCTTCCCAGTTTAAAGAGTCTCCATTAAAGA  
AGAGACAATTTTAAATACCTATGTGCATAAAAAATAG  
>DB7DT8Q1:335:H7TWNBCXX:1:1106:8906:31631/1  
GTTAAAACAAGCCAGGGCCTCTCAAGTATTTTCTTTGGATGCTTCAATTCCAACAAGGTGTTACGGTAGG  
GTAGTCCCCTGCTAATCAAACCGACCATGATACCACTTGGTCTCGATAACAATACTGCTTGCTTGATT  
CTTG  
>DB7DT8Q1:335:H7TWNBCXX:1:1115:19761:73354/1  
GTCACCTTCTCTATGTGGGCTTTGGCACAGTCATCATTAGGCAGGAGCTTGAGGTTACACACTGGAGCTC  
ATCTGGGTATTCATATTTGACGGGTGTAATGCTG  
>DB7DT8Q1:335:H7TWNBCXX:1:1201:4510:15062/1  
GGCAAGAGCAGGAAAGGGGGTTAGTGGTACTTGTGAGCCAGGGCAGCGCCACTCCAGCCACCACCTTCT  
GGAAGGCAGCCTGTGCAGCGGGGGTCAAATCCTTGCCAGGTGGTGGCCAGCACAATCACGATCATATTG  
CCCAGGAGCCTGAAGTTCTCAGGATCCACATGCA  
>DB7DT8Q1:335:H7TWNBCXX:1:1206:3694:26684/1  
GTTTGCATTATAGTTGGGGTGGCGGATGATTTTAGCTGCATCAATGAATTGCTCACCCACCTCAAGGGCAT  
CAATGTTGTGTTCTCCGAGGCGCACCTGAATTCGGGATTTGTAGCAGTGAGCGGCTGAAACAACCCACTGG  
GAATTGATGAG  
>DB7DT8Q1:335:H7TWNBCXX:1:1214:19172:59691/1  
CAGCAGAGTTACTAATGGAAAAGTGAGCTTTGCCATCACTGCCAACATTCACCTAAGTCCAGTGCAATTG  
CCATCGACCTTATCTCCAGAGATGACATCACAGTATGTGCCAGCAGGAAGACCAG  
>DB7DT8Q1:335:H7TWNBCXX:1:2107:18910:77618/1  
CGGTGTTGAGGTAAAATGTCTGGTAGAGTCTGCTTGTTTTTCCCAGGATATCTGTCAGCGTAATGACCCATC  
TGGGGGCATCCTCCACTCCACATGGGAAGCACTTATTTGCC  
>DB7DT8Q1:335:H7TWNBCXX:1:2112:1665:97945/1  
CACATCTTCATTCACACAAAGGGTCTGCCTAGAGCCAAGTGAGACTAGCCGGGTCTCCTTGCCAAAAGGGC  
TCTTCAGTACTTCCCGCACAAACTGGGCCAGCT  
>DB7DT8Q1:335:H7TWNBCXX:1:2116:5028:39517/1  
CAAATCTCTTTAATATAGATTCTTACAATTTTGGATCAGCATGGATTGAAATAAATGGGTCTCAGCAGAG  
TTACAATGGAAAAGTGAGCTTTGC  
>DB7DT8Q1:335:H7TWNBCXX:1:1212:13386:79759/1  
GGCCAGTCAGACGACAATTTCTGACCTGATAAGCATCATTGTAGTGATCAATTTCTCCATTACATTTATTA  
TCGTTAAAAGTCCCAAGCAGAGTATGGAACCTGCTGGGAATCCCTGTTATTTGGATTGAGG  
>DB7DT8Q1:335:H7TWNBCXX:1:1215:1840:78390/1  
CTTTAATTGCCTCACCACCCAGATCAATGACCTCTTGGAAAATGAAAGGTCTGCTTCCTTGGGAGAACCAT  
TTTGTATTGAGATTATGCAGTTTGTCCAAAAGTGCCTTTATGTCTCCAGGCCACATGTGCTTAG  
>DB7DT8Q1:335:H7TWNBCXX:1:1215:4982:79576/1  
GTTGGTGCAGAGCTCAGGGTGTGCCCCAGCCAGACACAAGACACCTAGTACCAGCTGATGGACAAGATC  
TTGGCAGAGCGACAGTGGACACTCGAGAGTTGAGGGTGGCAGCT  
>DB7DT8Q1:335:H7TWNBCXX:1:1216:14138:68179/1  
TGCAATTACAGTTTAGACATCTTTATGTATATTATGGCTGAAATACATTTTACCGAATCCCAGTCAAAAT  
GCTTTTTCAAGGTTGGAAATGGAGGGAGAGCAACTAGTGATTACATTTTTCAAGAAGCTCTGGAATGCTAG  
TCATTAGAGTCAGCGTGAGTGGCTACACTTGCTTGTATTTGTCATGGCTCTGGTCTCTCTTTG  
>DB7DT8Q1:335:H7TWNBCXX:1:1216:5237:70006/1  
CAAGGGAAGCAGTCATTGTGCTGGAACCTTCATAGGAGGAACAGGGGTACCCAGGAAGCCGTCAGGGTT  
GAGGATGCTGCTGGCATAAGTACTTGTAGCTCCGTAGGTGGTGGCAGGCTGCCAAGTTTCGAG  
>DB7DT8Q1:335:H7TWNBCXX:1:2106:9473:25771/1  
CATGGATTGCAATAAATGGGTCTCAGCAGAGTTACTAATGGAAAAGTGAGCTTTGCCATCACTGCCAACA  
TTCACTCTAAGTCCAGTGCAATTGCCATCGACCTTATCTCCAGAGATGACATCACAGTATGTGCCAGCAGG  
AAGACCAG  
>DB7DT8Q1:335:H7TWNBCXX:1:2109:14041:3970/1  
CAGACCTTGTGCAGATTTTATAGCTGATTGGTTGGTATCTTTCCACCAAGGTCTTGATGGGTTATGAACT  
ACAACGTTTTTCATTGGGTGGAGAGACCTGCA  
>DB7DT8Q1:335:H7TWNBCXX:1:2110:12379:37457/1  
CTAAACTGTTGTTTTTTTCCCTCAAGTCATGATTTAGGCAATGCAGATTGTAATAATTCATTCATTATA  
TATAGGCACATTAACATAAATATGCACAAAATATGCCTTTAAATTAAGCGAGAGGTATAAAAGCATGGT  
TTACT  
>DB7DT8Q1:335:H7TWNBCXX:1:2116:11456:6795/1



CTGGAGAGCAGTTTCGAGGCTGACGCTCATGTCCAGTGGGTAGGCACACTGGAAGTTGACATTGACACGAA  
AGTCCCTGATAATAGAGTCAGTGGCCAAGGAAAGGGTGT  
>DB7DT8Q1:335:H7TWNBCXX:1:2202:7890:83493/1  
GGCATCCTGGCATTTCGATTCCCTCCGTTTGGAAAGAAATCTAAGTGACCCACAGTCTGGCTCATTCCAAAT  
CCTAAGTTGGGGATAATGGGCCCGGCGTCTGTG  
>DB7DT8Q1:335:H7TWNBCXX:1:2204:11970:87499/1  
CTCTCACATCTGCACTGAAATGCAGCCCCAGTATCCAAACTTTCACACCTAACTTGGCTAAAATAAACAAA  
TCAACCAAAACAAACCCTCCCTCTGAATGGTTAGGCAGAATTACTAAGGAGGATCACAGAAACAGGGTCAG  
CCCAAACGCTTC  
>DB7DT8Q1:335:H7TWNBCXX:1:2211:5474:39846/1  
TAAAGTCCCAAGCAGAGTATGGAACGCTGGGAATTCCTGTTATTTGGATTGAGGAACTTCCACAGGTAC  
TGCTTGTTCCTGCAGGATTGCCTGCGCCACACATGTGGTTAATGACAGC  
>DB7DT8Q1:335:H7TWNBCXX:1:2214:3939:49021/1  
GCATGGTCTGCCCCATCCATTTGGGGTAGATAGGCATCCGTGAAGGGTGGGAAAACAGGTAAGAATAGGT  
CTTGGCGCTCTGGCATGGGCTTTGTGCTGGGAGCGCTATCTCCGTGGGGATCAG  
>DB7DT8Q1:335:H7TWNBCXX:1:1104:2991:58008/1  
CCCAGGCGCCTTCGCGGCCATGTCGTTGAGGCCAGCCAGATGTTGCGCATCGTTGCCACGCTGTGGCGC  
GCGTACTCGAACAGCGCCTCGTTCTCTAGCTCTGACTGCG  
>DB7DT8Q1:335:H7TWNBCXX:1:1109:12552:30139/1  
CAACAGTCCCTACCCTGGTAGAGTTGGTTATAGCCCACTCGGCCTCCTTCTGTGTCTTAAAGTCTGCTAAG  
ACCAACAAGAAAGGGGACTAGGCCATGATTCAC  
>DB7DT8Q1:335:H7TWNBCXX:1:1111:20110:66871/1  
CGGGGTTTCTAGCTGTAATTTCTTTTAGTTAGAAGTTTTCTAGTTAGTTCATTATGCAAAAGGTACAAGTT  
TAATCTTTGCTTGTCTTACTTTTAATTAGTCTTTTCATCTTTCCCTTGCGGTAAGTCTATAGCTCCTA  
G  
>DB7DT8Q1:335:H7TWNBCXX:1:1201:7982:55637/1  
CACACAAAGACTCAACAAAGAAAAAGAAGAAAAAGAACTTCAGACCAATTTCCCTTATGAATATCAATGCA  
AAAATACTCAATAATTTACACAAACCAATCCAAG  
>DB7DT8Q1:335:H7TWNBCXX:1:1202:19962:21147/1  
GCCACATGTGCTTAGCAGCATCAAGTCTGAACCCTGCTACTCCAATGTCAATGAGATGGTTCATATAGTCA  
GCCACCTTGGTACGAACATAATCTTTCTC  
>DB7DT8Q1:335:H7TWNBCXX:1:1101:8440:49046/1  
GTCAAGAAGTCGTTTCATGTGGATCTCTGTTTATAGGTACGGACAGCCTCTCTCACAAACCACTGACAGA  
ATGCAGGAGAAATCCACTCTCTTGCGTGGAACCACAG  
>DB7DT8Q1:335:H7TWNBCXX:1:1102:6186:94075/1  
GTAAACTACTTATGTGTCTAGAAGTTAAAGCCACAAGTCTTAGCTACTCAGTTTATGGCTGAAATCCAATT  
CGTGACCTCAGACAAGAGTCCACCCAGTCTCAAAAACATCTTCTGAGATAAGAATGGACCAATTAGTGA  
TGGGAAAGCAGATCAGCAGGGCAACC  
>DB7DT8Q1:335:H7TWNBCXX:1:2102:18920:22685/1  
AATAAATGGGTCCTCAGCAGAGTTACTAATGGAAAAGTGAGCTTTGCCATCACTGCCAACATTCCTCTAA  
GTCCAGTGCAATTACCATCGACCTTATCTCCAGAGATGACATCAC  
>DB7DT8Q1:335:H7TWNBCXX:1:2106:8013:85011/1  
CAGGACTGTTCCATTGGTCTGCAGCAGGCCCCAGCCTGTGACATAGCAGACATAGTTTCTCGGGAGAATG  
GTGCCAGCGGTGGGAGGCAAGCTGTCTGGATGTTCTTGTCTCAGGGTCAC  
>DB7DT8Q1:335:H7TWNBCXX:1:2106:15147:85417/1  
CTGGGTACCAGAACAGGGAGACGAAAGGCCTCTGGGTAGCAGGACATGACCATGAAAATGCGGCTGCAGTC  
AGGATCAGGGTTCAAGGTGGCTCCATAGTGAAGTGTGAGGGGGCAGGTCTGCCACTCCATTTCAGGAATAC  
ATAGTCAGCTGCAGCCACTCCT  
>DB7DT8Q1:335:H7TWNBCXX:1:2212:3323:51766/1  
CTTTCAATATGCAATGGACTTCACTAGCTCAGAATGCTGGTTAACTTCTCACCCACTATAGAACAACCTGCA  
GGGAGAACACTTACTTCCCACCATGCATGTTTTCT  
>DB7DT8Q1:335:H7TWNBCXX:1:2212:20907:52680/1  
CTCAATGAATGCAAAATCAGTCTCTCCCCTGGAATACCCTAGCCACTCTAGCCCCCTAAGCCCCATTCT  
ACCTGCAAAAATATATTCTATTTCCGTTTCCCAGGGAGATCCATGTATCCT  
>DB7DT8Q1:335:H7TWNBCXX:1:2216:14650:2061/1  
AGCAAATGAGGCCAGCCTTGTTTTTTAGCCCCCTTGACTAACTTTTGGAGATTTGGCTGGGGTAGGAAAGCC  
TTTAGGAACAGGTTGACTAGGTTAGGGAAATGCATTAGTGTTTGGGGGGGAAGGAGACGGCGCCTGGGGC  
AGAGCCTACCCCAAAG

>DB7DT8Q1:335:H7TWNBCXX:1:1103:20297:61075/1  
CTCTTTTTGTGCTGGGGATTGCATTTAGGCCGTCTGTGCCAGGTGAGTAATGACCTCAGCCCTCTCTCACT  
GGTGAACAAGACACAGTCTTATAAATTGTTAAGCGGACCTGAACTATAAGTAGCTTAAGCAGGCTTGAAT  
TTGAGATCCTCCTGCCTCCGCCTCCAGAGCAGCTGGC

>DB7DT8Q1:335:H7TWNBCXX:1:1207:16749:86059/1  
GCTTCCTTCTCGCAGGCAGCATGCACATCCAGCAACTCCTGGAGAGTGTCTGTGGGAAGCCTCAGTCGCTG  
GGCCATCTGCTCACTGTAGTGGTCGGCTGCCTTCTGCACAGCTAC

>DB7DT8Q1:335:H7TWNBCXX:1:1215:8006:32417/1  
CGAACTCAGAAATCCACCTGCCTCTGCCTCCCAAGTGTGGGATTAAGGCATGCGCCAACACTGCCCCGC  
AGGAGCCTCCTGTGTTAAAAGCAGGTTTCAGGCTTAAG

>DB7DT8Q1:335:H7TWNBCXX:1:2105:11203:5156/1  
ATTTGGTCTTGCCCCAGCCAGTGGTGGCACACAGTGTCCCAGCAGGGAAGTCATCGTCAACAGTGGGCAGA  
CACACGGCAGACACAGTCTCAGAGAAGTGGGCAGGAGTGGCCAGCTTCAGCAGGGTGATGTTCAT

>DB7DT8Q1:335:H7TWNBCXX:1:2110:12416:88545/1  
AGCCATTCACCTTGC GGATAACTGTGCCAAGTTTTGCACCATACTTGAATTCTGT CACACGGCCATTTCCA  
AAGTACTCACTACCTTTAATTGCCTCACCACCCAGATCAATGACCTCTTTGAAAATGAAAGGTCTGCTTCC  
TTGGGAGAACCATTTTGTATTGAGATTATGCAGTTTGTGTC

>DB7DT8Q1:335:H7TWNBCXX:1:2112:18739:81710/1  
CCTGGCTCTGCCCCATAGAGCCACAGGACCCTGGGCACCTTTTCTACTTTCTAGGATTTTGTGATAATCTG  
CTTTTCAGTATATACAAAAGGGGATTAGC

>DB7DT8Q1:335:H7TWNBCXX:1:2116:6943:17667/1  
GGACATTTCTTTCATCGGAGCCCTGATCAAACCTCTCCAGCTACCACCACATCGGTTGTCTTGACCCACAG  
TGGGCAGCAGTGACCACCCAGTTTTTCGCTGATGAGGAGCCCCGCAGAAATGGAAGCCAGTTC

>DB7DT8Q1:335:H7TWNBCXX:1:2209:7562:29289/1  
GGAATTCACAACCTCAGATGAACTCAGAGAAATGTTTTATTCTTTACTGAACCAGAATCACACAAGAGGAAA  
ATCATGGCCTAAGTGCCGAGCTAGTAGAGTAATGCCTTTTCATATTTTTATGCAAAC

>DB7DT8Q1:335:H7TWNBCXX:1:2209:9323:85654/1  
GCCGCGCTGCACGCCATCTGGCTTGATGGCAATGAAGGTACGCTCGAGGTTGGCCATGGTCCGAAAGCCGG  
TGGGTCCGCTGGTGTCTGCGATGAGCGACAGAAGCAAAGAGAATAGAACGAACCAGCCGGCGCGGAGAGAG  
GAG

>DB7DT8Q1:335:H7TWNBCXX:1:2215:16261:41971/1  
GGCAGACACAGTCTCAGAGAAGTGGGCAGAGTGGCCAGCTTCAGCAGGGTGATGT CATTACGCACGGTGAA  
GGAGTTGAACTTGGGGTTCTTAAAAAC

>DB7DT8Q1:335:H7TWNBCXX:1:2216:10291:32249/1  
GTAAGGGTCTATGATTAGCCTTAGAATGATACACCAGACTCAAATATTATGTAAACATAGAGTGT TTTTATT  
CTTCGTAAGTCCAGCATGCTGGGGTCTACCATCTACAAAGATGGAAGACCCTGCAGTGAGCTTGCAGGCT  
TGATTTAAACCACATTA

>DB7DT8Q1:335:H7TWNBCXX:1:1207:15669:24243/1  
ATTTTATGGCTGGGGTTGCCACAACGTGAGGTGAGGAACTGTATTAAGGGAGCATTAGGAAGGTTGAGAA  
CCACTGCTCTAGGCCAGTGAGAGACCTGTCTCAAAAAACACAAGTTGACTGTAACAATATCCAAG

>DB7DT8Q1:335:H7TWNBCXX:1:1212:2744:69861/1  
CAGAGAGGCATGCACCGCGGGGTGAAATCGGCAGGGTGGTGGCTAGCCAAGGTCAACAGCAGGCAGTGGC  
TCAGGAGCTTGAAGTTGACGGGATCCACACGCAGCTTGTGGGCATGCAGGTCTGCTCAGAGCAGACAGGGCA  
CCGGGCAGG

>DB7DT8Q1:335:H7TWNBCXX:1:1214:1378:63211/1  
CAAGGCCTCACGAGCTAGGGGTGCTCCATTCCTTTAACTGCTCCCCCTTTAACTGGAGTTACACATCAAGT  
TCTCTGTGCACTTAGGAACTCTGTTCCTTTTCTCTCCCTGTAGTCACTATCTAACCCAATTAACTCGACA  
TTTTTAAAAACACTATCTAACCCAATTAAAC

>DB7DT8Q1:335:H7TWNBCXX:1:1215:17026:3535/1  
CTCTGTGTGTAGCTGTCAAGAAGGAAGTTTCTCTTTGTTTTAGGTCTTACCTCACTGTACCATTACCCTGC  
CCTGCGTCTGTCTGCTGGCTGTAAAGTGGTCATCATAATGCATTTTAC

>DB7DT8Q1:335:H7TWNBCXX:1:2108:18104:69250/1  
GTCCACAACCAGCAGGCGGCCCTGCCTCAGGGTGT CAGGACTGTCCCATTTGGTCTGCAGCAGGCCCCAGC  
CTGTGACATAGCAGACATAGTTTCTCGGGAGAATGGTGCCAGCGGGTGGGAGGCAAG

>DB7DT8Q1:335:H7TWNBCXX:1:1215:19417:67562/1  
GTTTTATGGCTAAGCATAGTGGGGTATCTAATCCCAGTTT GAGTCTTAGCTGTGCTGTATTATAAATGACTA  
GAATTACTTTTCGTTATTGAGTTTAGG

>DB7DT8Q1:335:H7TWNBCXX:1:2206:18794:59630/1

CCCACCAGTTTGAAAAAGGCTGACCATTGACCACATTCCTGAAGGCAACCATGTTCTGATTTGACGCCAT  
CTGTGTTACAGACCCAGTCATTGCCACAAGTAGTGTCTGCATTAATGGTCACTTCTTTTGTACTCCATT  
GTTATTGGGTGG  
>DB7DT8Q1:335:H7TWNBCXX:1:2207:6502:7865/1  
CTCCATTGTTATTGGGTGGTCCAATCCAGTCATTCTGATCTTTTCCATTCTGGAAATTTCTATTCCAACGG  
TAACTTGACATTACTCTTGTGAATCCATAAGGATGAGCCAAC  
>DB7DT8Q1:335:H7TWNBCXX:1:2209:11712:14985/1  
CTTGAGAGTACAGCAGGTGCTCACAGAGGCAAGGAATTTGTCCAGAGAGGCATGCACCGCGGGGGTGAAT  
CGGCAGGGTGGTGGCTAGCCAAGTACCAGCAGGCAGTGGCTCAGGAGCTTGAAGTTGACGGGATCCACA  
CGCAGCTTGTGGGCATGCA  
>DB7DT8Q1:335:H7TWNBCXX:1:2212:16975:32401/1  
AAAGCTTTCCTGGTCAACACAGTTCCAAGTCAGCCAGGGCTATGTACAGAGAACCTGCCTCAAAAAACAAA  
AACCAAACCAACAAAAATTCCTGGCCAGTAAATGGCTTAGTGGAG  
>DB7DT8Q1:335:H7TWNBCXX:1:2213:1658:74093/1  
CTCAAACCTACTAAGTAGCTGAGGGTACCTTGAACCTCAATCTGCTACCTTCCAAGTAATGCGATCACAG  
GTGTGCACCACAACACTGGCAAAAGAACCGGTCTAGGATAACACAATGGCAGACAGGAAAGACAAT  
>DB7DT8Q1:335:H7TWNBCXX:1:2215:18468:3051/1  
GTTTGTATATGCTTGGCCCAGGGAATGGCACTATTTGAAGCGTAGCCTTGTGGAGCAGGTGTGTCTCTG  
TGGGCTTGGCGTGGGCTTTAATAACCTCACCTAGCTGCC  
>DB7DT8Q1:335:H7TWNBCXX:1:2215:1633:80254/1  
ACACCCCCGGGAAGCTCGCTCCCACCTTCTACCAAGGTCCAAGGAAGGGAAATGTTCCCTCTTCAAAT  
ATCTATGGTATGTATGTACAGGCCAATTGGGCCTTGTCTTTAATTCAATCAC  
>DB7DT8Q1:335:H7TWNBCXX:1:2216:10786:24283/1  
CAGCATGGTCTGCCCCCATCCATTTGGGGTAGATAGGCATCCGTGAAGGGTGGAAAAACAGGTAAGAATAG  
GTCTTGGCGCTCTTGGCATGGGCTTTTGTGGGCCAGCGCTATCTCCG  
>DB7DT8Q1:335:H7TWNBCXX:1:1102:11233:16192/1  
AGCTCATTATTGCAACTGTAAAGTATCCTAACTGGAAAAAGTATTCAGTAACATGTTAATGCAATTTAGCA  
CTAACATTATTTCTTCTAATTATTTTGTGTGCAGAAATCATATCAGCA  
>DB7DT8Q1:335:H7TWNBCXX:1:1103:5824:93654/1  
CTTTTATTCTGGAAATTTCTATTCCAACGGTAACTTGACATTACTCTTGTGAATCCATAGGATGAGCCAAC  
ATAAATCCGACAGCCATTTTATACATTCTAGCATCCAGAAATGTCAGGATGGATGATCCTCCA  
>DB7DT8Q1:335:H7TWNBCXX:1:1104:17653:53598/1  
GGGATGCTTAGTTTGAGCAATGGTGTTTTGAATCCAGTCCACATAGTTGCAGACCTTGGTGTACACACCA  
GGGTTGTCTTCAGGGCACAGCCATAGCCCCA  
>DB7DT8Q1:335:H7TWNBCXX:1:1106:15096:17264/1  
GGAACTTGGGTTTACCACGTGGTTATTCCAAAGAACTTGACTTTCTCAATTGTTCCACATCAAGCTTG  
GCATCAAACCTCATTGGAATGCGTAGCACCAGGCTTGATAATTCCTGAAGATATCACACTGGCGAGTATT  
GCCGTTACTTCAAACAGAGACACTTTGACTTGGC  
>DB7DT8Q1:335:H7TWNBCXX:1:1107:12620:59939/1  
CTCACTGGACCAGTGGCTCAACAAAATGTTACTAAAAAGCAGAACGTGAGGAGGGTGCATAGAGACATAC  
AGAGAACATTTGAGATAAAAAAGAAAAGCAAGAAGGCC  
>DB7DT8Q1:335:H7TWNBCXX:1:1115:15222:64472/1  
CTCTGCTAAAAGCTACTTGGTTGCTGTTATTATCCCACCAGTTTGAAAAGGCTGACCATTGACCACATTT  
CTGAAGGCAACCATGTTCTGATTTAACGCCATCTGTGTTACAGACCCAGTCATTGCCA  
>DB7DT8Q1:335:H7TWNBCXX:1:1202:7282:53560/1  
CACACATGTGGTTAATGACAGCATCCACATAAATACGGACAACAACATTGTTGCACCTTGTACCATGTCT  
ATGAATTCATCTTCATTTCCAGACCTTGTGCAGATTTTATAGCTGATTGGTTGGTATCTTTCCACCAAGG  
TCTTGATGGG  
>DB7DT8Q1:335:H7TWNBCXX:1:1203:7135:57555/1  
CCAAGATCTCCTGAACCCAGGGCATGAGGGCAGTACTCGGCATACACGGCAGGGGTGGAAGTGGAGCAG  
AAACCCTGCCCCAGGACACAATGCCTGCCAGGGTCCAGACTCCGTCCTTCTGGCAGACGAGGGG  
>DB7DT8Q1:335:H7TWNBCXX:1:1207:7519:59831/1  
AGTTGTTATACGCGTATGCCTGGAGAATTGGAATTTGTTACTCATACTAACAGTGTTCATCTATAAAG  
TTATAGATTAACCAATTTAAGTTTAGG  
>DB7DT8Q1:335:H7TWNBCXX:1:2103:6487:99786/1  
GTGAGAAGTACCTGGCTGCAGAGAGCCCTTGAAACTTCACTAGTTTAGAGTTTCTCCATTTCCAAACA  
AAGAACTAGAATGTGCCAGTGACCTTCTGTCCAGACAGGGTGCAGTC  
>DB7DT8Q1:335:H7TWNBCXX:1:2104:19021:50916/1

CAATGTCAATGAGATGGTTCAAATAGTCAGCCACCTTGGTACGAACATAATCTTTCTCAAGTGCAAGATCC  
AGAAGGCCAGTCAGACGACAATTTCTGACCTGATAAGCATCATTGTAGTTATCATTCTCCATTACATTTA  
TTATCGTTAAAGTCCCAAGCAG  
>DB7DT8Q1:335:H7TWNBCXX:1:2111:2706:47528/1  
CTGATAGTTGCTGAGGCAATGGGCAGCTGTCAGAACCCAGTTGTTGGCCACCAGGGAGCCTCCGCAGTTGT  
GGCGCCACCTTCCGGAGGAAAAGGACCTGCAGGGAGACCTGCCAGGGCCAGGTGTTGGGTGTGGC  
>DB7DT8Q1:335:H7TWNBCXX:1:2208:18108:28362/1  
CAACAACATCCGGGTGTTTACGAACGTTTCCCCTCCAGCGGGAACCTTCAGGATCAGCTTGGAAACACAGG  
CAGCCGGCAGCAAGATGTTTACAGGCACAGTGTATGGAGTGGAACGGCTGCAGCCTCTGCCAGAAGGACA  
TGGCTGGGACTGGCCTGCTGGCCATCAAGGAAGGGTTGATTAGTCTCCCTGAGGGCTCTGCCTCTGCATT  
TTCAG  
>DB7DT8Q1:335:H7TWNBCXX:1:2208:10527:29738/1  
CAAAACTGCTATATTTTATACTCATATGCTATATTAGCATACTCTGGATACAAACTCAAATGAAGCTTGAA  
TTCTTTTTTTTTTAAAGATTTATTATTATTATATCTAAGTACACTGTAGCTG  
>DB7DT8Q1:335:H7TWNBCXX:1:2212:6854:10917/1  
CTGAAATCCATTTTGTGCGCAGATTAGAGCCAGGATGTTTTGACTCTGAGGGTGAACCTCTACTGGGATCT  
GCTCATTTTGCAGAGGAAGTAGGGCGGACTTGTCTGTG  
>DB7DT8Q1:335:H7TWNBCXX:1:2216:13799:27344/1  
AAGGGTCGGGAGCGGAAAAACACGGGAACGACACGGGAACCCACGACCGGCACCGACAGGACCGACCCGCG  
GAAATCGGGCAAGCCGGAGGCGCGGG  
>DB7DT8Q1:335:H7TWNBCXX:1:1104:11936:91207/1  
CCACTGTCACACGGTTCATGCTGGGGACCAATATTTCCAGGAACATCTGACATTGTTAGGATAGTTTAAA  
GGGTAGTGTGGGCTGGAAAATTTGCCAGAGGGTGGGTGAGGACCTCCA  
>DB7DT8Q1:335:H7TWNBCXX:1:1109:18934:18655/1  
TGGAGGTCAGCACGGTGTCTCACAGAGGCAAGGAATTTATCCAGAGAGGCATGCACCGGGGGGTGAAATCG  
GCAGGGTGGTGGCTAGCCAAGGTCACCAGCAGGCAGTGGC  
>DB7DT8Q1:335:H7TWNBCXX:1:1202:16135:23720/1  
GTACCGCAGTCTCAAGTTCCGCGCGATTGGATTGGAGCAGGCACCTGTGATCCACTCACCAGAGGTCTTAGG  
GTCCCGTGGGAGTCCCCTGTGGACCTTGCGGGTGTTGGCAAGACTCTGCTGGCAAGGTAGC  
>DB7DT8Q1:335:H7TWNBCXX:1:1208:6815:8228/1  
AGGCTTCGTCTGAAGATGCTAAAAGTTCAGAAATCCTTCTATGCAGCTATCTAAGGATCTAAGGTCCCCAA  
GAATACTCCCTTTACACGGACTAAGAGAGCCAACAAAAGGGCAATATGCA  
>DB7DT8Q1:335:H7TWNBCXX:1:2111:15006:85448/1  
AGTTGTTATACGCGTATGCCTGGAGAATTGGAATTCTTGTACTCATACTAACAGTGTGTCATCTATAAAG  
TTATAGATTAACCAATTTTAAAGTTTAGGAAGTTGGTGTAAATTAATGGAATTAATGAAATTTTATGTTGA  
GCTTGAACGCTTTCTTTATTGGTGGC  
>DB7DT8Q1:335:H7TWNBCXX:1:2111:1876:72488/1  
GCCATGTAGGTGCTGGGAATTGAACACAGGACCTTTAGAAGAACAGTGAGTGATCTTAATTCCTGACCCAT  
CTCTCCAGCCCCAGCTTATAAGACTTTAGAAGCCAATGGTGGCAGGCATCTGAG  
>DB7DT8Q1:335:H7TWNBCXX:1:2204:20995:12794/1  
CTTGGCAATATCAACCCAGCGCCACTCGAACAGGTGGACAATAGCAGTCCTCCCATCTGAAGTATGTGGGT  
CATATTGAGCCCAGCAGAACCCAATGAGGGAAAGCAGCAGAACGAAC  
>DB7DT8Q1:335:H7TWNBCXX:1:1105:17619:56422/1  
GTACATGGAGCACAGTTCTCTCAAGGAATATGCATACTTCAGGACATCCTGATTTTGGCAGTAACTATTC  
TCATTCTTTCTTTAGGTAACCTAAGAAACAAAGGTATGTATGTTTTGTTTGTGTTGTTGTTTCTC  
TTCTAAACAAGGAAC  
>DB7DT8Q1:335:H7TWNBCXX:1:1106:9169:75216/1  
CTGGTCTACACGGCACGTGCAGCACAGCCAGCTACACAGGAACACCCTGTTCCAAAAACCAACCAAGTACA  
CAAATAAATCCTAACAAAGGAATCAATCTTCTAATTAATCCTAAAAATTAATACATCTTGTAGAATTTAAG  
AAAACAACCTGGCATATATTTAGAATGATACAGAAAATATAAAAAGGCAG  
>DB7DT8Q1:335:H7TWNBCXX:1:1108:18116:88824/1  
GCGATACTTGGCAGCTTCGTTGACAATCTGATCAAAGGCAGGGAAAATATAGTCGGCAAACCTGGATTTCCG  
CAATAGCTGTAGCACCAGGTGACAGCGATTCCAATGCCAAATCCAACCTATTCTTGTTCACACAACGGGGTG  
TTAAAC  
>DB7DT8Q1:335:H7TWNBCXX:1:1114:2400:72542/1  
CGAGGTGGCCTGCAGCATTGGCCAGAGCATCGGCGACCTTCTTGGCGTGACCCTTGACCTGGGCAGAGCCG  
TGGCTTACATCAAAGTGAGGGAAGTAGGTCTTGGTGGTGGGGAAGCTAGCAAACATC  
>DB7DT8Q1:335:H7TWNBCXX:1:1203:12168:100113/1

CGACTGCTCTCTTTATTTTAACTTACTTGATTTTCGATTAAGAATGCCAAATGTCCCTTCTAAAGCATTTAAT  
ATACATAATCTTGTTTACCTGTAAAGTATAATCAAG  
>DB7DT8Q1:335:H7TWNBCXX:1:1207:19837:40538/1  
GGCTCGCTTGCATGTGGTGATTGTGTAGAGAATACATAGTATCTAGAAGACACTCTGAGGAACACAATAGA  
GCTACAGGGTGAGTCAGGGTGGGGAAGCTTTTTGTAGCTAGCAACAAATGAACATAAG  
>DB7DT8Q1:335:H7TWNBCXX:1:1214:4858:63813/1  
GGGGCCACCAGAATCACCCATACAGGAAGAGACGCCACTGGCGCCTGCGCAGATCATCACATCGGTGATC  
TTGGAACCCAGGACTACTTGCACTTAGCCTCGGAACGATGGGCAGGGCAGCCTGCTGCAGCTTGTGAGGG  
GTCTTGAG  
>DB7DT8Q1:335:H7TWNBCXX:1:2103:7641:25738/1  
GCTGCAGCTTGTGAGGGTCTTGAGGGCATTGTATTTGGTCTTGCCCCAGCCAGTGGTGGCACACAGTGTG  
CCAGCAGGGAAGTCATCGTCAACAGTGGGCAGACACACGGCAGACACAGTCTCAGAGAACTGGGCAGGAGT  
GGCC  
>DB7DT8Q1:335:H7TWNBCXX:1:2113:13178:55356/1  
CAAAAAACACCATAAGTATTCTATCAGTATCTATACTGTAGAAGAATGATGACTCAGTATTAAGAGTCTGA  
AGTCAGTCTATCATCTTTCCCTCCAAAATTTAACTGGGTTGAATTTGTTGGTTTTTTTCTACTGCCCTAAAA  
ATCAGGATTAATA  
>DB7DT8Q1:335:H7TWNBCXX:1:2201:1774:81612/1  
GGTCACTGGGCTGGCCAGTTTGTATTAAGCAATGTCATAGCCATTGCCGACGTTTTGGGAGTTCCACCTCT  
GGTGGACCACAAGCTTAGAGACTTGAACAGCAGCAGAGCCAGCTCCGGGGTTGG  
>DB7DT8Q1:335:H7TWNBCXX:1:2203:10223:2292/1  
CAGTATTCTAGGAAGGAGAAGCTAAGGGATTTCTAAAGAGCGAGCAGTTTAGTTGTAGGCTTATAACTCGA  
CATTTTGTACATAGTTGAGAAAAATAAATCACC  
>DB7DT8Q1:335:H7TWNBCXX:1:2207:16379:96128/1  
CCAGGTGCTGGGTTGGTGTATAGGGTGGACACGTGAGAGATACCAATAAACTCTGAAGTGCTTTTTCAAGA  
CGGATGGAGAATTCGTAAAACCTCTTCAGCCTCACACCAGAGGACACACTGCATTCCAAGCCTTCTCCTG  
AAGTTGAATGTCATTGGGATTTTGAATTGCATCTCGGATCTCTGGTCCTGCCCTTTGTAAGCCTG  
>DB7DT8Q1:335:H7TWNBCXX:1:2115:19226:17693/1  
GGTGGCCTGCAGCATTGGCCAGAGCATCGGCGACCTTCTTGCCGTGACCCTTGACCTGGGCAGAGCCGTGG  
CTTACATCAAAGTGAGGGAAGTAGGTCTTGGTGGTGGGGAAGCTAGCAAACATCTTTCCAGGGCTTCAGC  
TCCATATTCAGCAC  
>DB7DT8Q1:335:H7TWNBCXX:1:2214:5056:98496/1  
CTTGGCAAGTTGCTGTCTAATCTTGTAATAGATGACCACATTTTCTTCATTGGGAATGACTATTTTATTAT  
ACTGCTCTTCTGAGTTCTTTACCTTTTCTACGACCCCTGGAATTGCTCTATAATGCTGAAACTGGTAAAAG  
>DB7DT8Q1:335:H7TWNBCXX:1:1102:9108:36241/1  
CCAAACTTCTTGAAGTACTCCCTGAGCTCCGTCTCCCCGAGTTGTGGGGAATGCCCCGACAAAGATCTT  
GTTGGATTTGCTGCTGTGCTCCTGGGTCCTTTCTGCCAGCCTTCCTTGGGCCGTG  
>DB7DT8Q1:335:H7TWNBCXX:1:1107:1376:18264/1  
AAAGAGAGGGCTTATGAAGAGCTAAAGGCATTTAGTTGGCAGCGATGGTCTGCTGAATCCAGTTCACATAC  
TTGCACACCTTGGTGTAGACACCAGTTTTCTCTCTGAGCACAGCCATAACCCCAGGAAACAACACCCTG  
GAGTTGTCCATTGCAGACTACGGNCCACCAGAGTCAC  
>DB7DT8Q1:335:H7TWNBCXX:1:1116:5672:22044/1  
CTGATAAGCATCATTGTAGTTATCAATTTCTCCATTACATTTATTATCGTTAAAGTCCCAAGCAGAGTATG  
GAACTGCTGGGAATCCCTGTATTTGGATTGAGG  
>DB7DT8Q1:335:H7TWNBCXX:1:1203:9555:3317/1  
AGGAACAGAAAGTTGTTTCTCAATAAAGACCTAAAACAGGAATTTCTCCCCAGCAGTCGGTCAGTAGCTACA  
AATCCAACACTTATCTACCATAACCCGCTCTTTCACACTTACTCTGGTTAGCTCTTAAAAACTGCACATTC  
ACAAAGTTTATTTTATTAACATGCCAGTTGACTGCAATATAACAGCCATCAAAAAAGCTAAAATTTTGA  
GAGCCCTGA  
>DB7DT8Q1:335:H7TWNBCXX:1:1206:15336:89478/1  
CAAAAGGCCAACCATGGGCAGAGAAAGAGCACGGGTGACTCCTCCCTCAGGTTTGTATCAAGGGCATTAG  
CCTCAGCCACCTCTGAGCTACTCCTCTCTCAGGCTCAATGTCC  
>DB7DT8Q1:335:H7TWNBCXX:1:2102:14619:29295/1  
ATCAAACCCCTCCATTCAAGGCTCAGGGATCTATATACAAGAGAAGACAGGAAGACTGTGAGAGCCAGTGA  
TGTTGAACTCCAAGGAAACTGTCTTTTCAGACACAGCA  
>DB7DT8Q1:335:H7TWNBCXX:1:2204:18917:93159/1  
GTAATGCGTGCACCCAGTACTGCCGACACTGATTCACAGTGACCAGGGGTAGAACAACCTGCTGCAGGGC  
AGCTGGTGTACATTGCCACACCCTGATTCGGCCCCAGCCAGGGTGACACAGGTGAGCCCCGAAG

>DB7DT8Q1:335:H7TWNBCXX:1:2206:9573:25855/1  
GTCAGCACGGTGTCTCACAGAGGCAAGGAATTTGTCCAGAGAGGCATGCACCCGCGGGGGTCAAATCGGCAGG  
GTGGTGGCTAGCCAAGGTCACCAGCAGGCAGTG  
>DB7DT8Q1:335:H7TWNBCXX:1:2214:2405:65172/1  
AGGATCCACATGCAGCTTGTACAGTGGAGCTCACTGAGGCTGGCAAAGGTGCCCTTGAGGCTGTCTGAAGT  
GATTCAGGCCATCGTTAAAGGCAGTTATCACTTTCTTGCCATGGGCCTTCACTTTGGCATTACCCATGATA  
GCAGAGGCAGAGGATAGGTCTCCAAAGCTATCAAAGTACCGCTGGGTCCAAG  
>DB7DT8Q1:335:H7TWNBCXX:1:1101:5606:19770/1  
CACATACAGTGTCCCAGGAACCCCTGGTAAAGGATCTCCACTCGACCCTGACACCTGTCTCCTCCGTTCCACC  
AGCCTCACAGCCAAACCAGAATCTGTTCCCTGCAGTGGTTTTGTTTCAG  
>DB7DT8Q1:335:H7TWNBCXX:1:1103:12741:23196/1  
CATCAGAGTGACAACATTTCCAAATCGTGTGTAAATATGAAACACAATTCTGAAACTATTTGGCTGACT  
GACATCATTGACCCTGAAACCAGGGACACATTAATCTCAGAG  
>DB7DT8Q1:335:H7TWNBCXX:1:1103:18800:24509/1  
TGTTAATATCTGCTGAATACAAAACTTTATGATAACCTCCAACATCTTTCTTAATAACCTTATAGGCAATA  
GTTAGAGGAGAACATATGCTGCTAGGTGGCTAACGTTAGCAACCCACTTCCCTTTCATCATGTTTTAAGAGA  
TTATTTATAAAGAATCTTATGCTCACAAAACATAAAAATCTTTTCCCTTCAAGTCAG  
>DB7DT8Q1:335:H7TWNBCXX:1:1105:4863:6943/1  
TGTTTATAGGTACGGACAGCCTCTCTCACAACCTGACAGAAATGCAGGAGAAATCCACTCTCTTGCCTGGAA  
ACCACAGTCGATGAAGAAGGCAGGCTTATTTGGTCTATCTTTGCC  
>DB7DT8Q1:335:H7TWNBCXX:1:1105:9782:38029/1  
GCGAGTATTGCCGTTACTTCCAAACAGAGACACTTTGACTTGGCCTGTGACCGTCCCTCCAGAGAATGTCA  
AGGAAACACGGTACCTCCAGCGTGCAAAGTTCTTG  
>DB7DT8Q1:335:H7TWNBCXX:1:1111:8984:61920/1  
TGGAAATAGGACCATATCAATGCATGGGCATTCACCTGTATAGTCTAATTATTCCCTAATTAATGGCTTATT  
TGCCATGTCATATAGAGCGTTGATACTTTCTTTGAATACTAGTGAACATTCCTACAGAGGAATGGATACAA  
AAAATGTGGTACATATACTACTCAGCTATTA  
>DB7DT8Q1:335:H7TWNBCXX:1:2203:5933:74077/1  
GTTTCTGATACACAACACTGTTTCATTTTGTCTAGACTGGCTGTTTGGACTTGTTGATGTAGCCCTGAATGGA  
CTAGATGTTGGCGTGGTGTCTCGACCACCAATTGGAGGTGTTCTGGTTTGTATCAATGCCACTCCCAAA  
GGCTTTTAGTTCCATTTTCAGACATTTTTCCTGTGGTCCGATCATGCTATGCTGTGTTCCAGCAGGGATTA  
ATCCTCGGAAAGGCTGGCTTACTTGGGCAGGACGGCTCAAAC  
>DB7DT8Q1:335:H7TWNBCXX:1:2206:9825:62638/1  
GGGACACCTGATAGGGGACAGAACTCTCTCGGCAGGTGTATCCTCCAACAATATTGTCATCATCATCCACA  
GGGAAAGCAACAGCAGCTCCCACAAGGGCTAGG  
>DB7DT8Q1:335:H7TWNBCXX:1:1116:3520:75139/1  
AGCATGGATTGCAATAAATGGGTCCCTCAGCAGAGTTACTAATGGAAAAGTGAGCTTTGCCATCACTGCCAA  
CATTCACTCTAAGTCCAGTGCAAATGCCATCGACCTTATCTCCAGAGATGACATCACAGTATGTGCCAGCA  
GGAAGAC  
>DB7DT8Q1:335:H7TWNBCXX:1:1208:13298:70473/1  
GCATCAAGCGCCAAGGTCCCTGAGGCAGGAGAAAGGAGACCAGAGAGAGGCTGGAAGGGTGAAGAAGTGAGA  
TTGGGCTTAGCTTTGGAGGACATACAGG  
>DB7DT8Q1:335:H7TWNBCXX:1:1211:19724:51543/1  
GTGACAGTCCCTGAGTTTGGGGTGGGTAGGGTGTAGATATAAGCATCCCATTCATAGATGAGTATTCCAATG  
ACATTTATTTCTCTGGATGTTGACCCTTATAACTAACTCCC  
>DB7DT8Q1:335:H7TWNBCXX:1:1213:10760:16046/1  
GAGACATTTCAAGGATGGCACACACCATCAAGGCCAACAAAGCCACCATAGATTACAGGCATAGCAAGAG  
GCAAAAGTTCATGAAGGGAACCCAG  
>DB7DT8Q1:335:H7TWNBCXX:1:1215:19775:57604/1  
GGCATGGATTGCAATAAATGGGTCCCTCAGCAGAGTTACTAATGGAAAAGTGAGCTTTGCCATCACTGCCAA  
CATTCACTCTAAGTCCAGTGCAATTGGCATCGACCTTATCTCCAGAGATGACATCACAGTATGTGCCAGCA  
GGAAGACCAGTCTGTAAAGTGGCTGACAAAGCCCAGTCATCA  
>DB7DT8Q1:335:H7TWNBCXX:1:2106:12942:32842/1  
CTCATATACAACCTTTAGAGAGGACAGATTTACAGCCTCTATTTTATCTCTGATGTCAAGGTCATCTACT  
ACAAATACGGAGTAAAATGAATGAGGTTGGATTCCCTAAGAGGGAGGGATCCA  
>DB7DT8Q1:335:H7TWNBCXX:1:2106:16085:88728/1

CTAAATGTGATATTGAGAGTGGTTTTCAAGTAAGGAGCCATGTACCAGAGCTCCATTTTCTTAGGTAAGAT  
TCCTATTGCTGTGATAAAACATCATGACCAAATCAACTTGGGGAAGAAAGGATTCAATTTCTCTTATAGC  
TTGTAGTCCATCATCCCAGGAACTCCAGACAAGAACCTTGAGGCAGG  
>DB7DT8Q1:335:H7TWNBCXX:1:2112:20571:56170/1  
CTGGGCAGAGGTACAAAGGCCACTCTGGCATTGAGGGTACAGGGGAAGCCAGTTTGATCAGCATGATGTC  
ATTGTCCAGGGTCCATGAATTATAATTGGGGTGCCG  
>DB7DT8Q1:335:H7TWNBCXX:1:2116:20891:47463/1  
TCCAGACCATCACAGGCAGGTTGTGGGACACCTGCTTCCCTGCCCTGGGGCACCCAGATATTGAGGTAGAGG  
CAGTCTTCTTGCCCATAGGTGTTGTCTGGGTGATGG  
>DB7DT8Q1:335:H7TWNBCXX:1:2203:16071:19222/1  
GCAAGATCTGCTTGGCTGGCAGGAGGAAGCCATAGTAGCCTGTGTCTCTCAGTTCAAAGGCAAATGAGTAT  
TTGATGCCAAGGTATAAGCCAGTCGATGCTTCCGCCACTGGCCTGGTAGATGACAGAACAGATGGGTCC  
CAC  
>DB7DT8Q1:335:H7TWNBCXX:1:2216:21491:40767/1  
TTTTCTCTGCTCCTGAATCCCGGCTGCACCTGTGCCCATGCTTCACGTGTCACTCTTGGAGCACATGCC  
ACCTCCATGATGTTCCCTCCGAATGCTAGCACACTCG  
>DB7DT8Q1:335:H7TWNBCXX:1:1202:17348:14589/1  
GCTGTGTCCACTTGCACGGGTGTGGCTGTCAAAGTGGGATTCAGAAATATGTTTACGTTGCTTATCAATA  
CCTCATAGAGAACTTCATTCTCCTCGAGAAAGTTCTCCACATCA  
>DB7DT8Q1:335:H7TWNBCXX:1:1212:5992:45650/1  
GCAGGTGCAAGGGAGAGAAGAAGGGCATGGCCAGAAGGCAAGCCCCGAGAAGGCAGCTTAACGGTACTTG  
GAGGTGAGCACGGTGTCTCACAGAGGCAAGGAATTTGTCCAGAGAGGCATGCACCGCGGGGGTAAATCGGC  
AGGGTGGTGGCTAGCCAAGGTACCAGCAGGCAGTGGCTCAGGAGCTTGAAG  
>DB7DT8Q1:335:H7TWNBCXX:1:1212:3927:48205/1  
AGCAGAGTTACTAATGGAAAAGTGAGCTTTGCCATCACTGCCAACATTCCTCTAAGTCAAGTGCAATTGC  
CATCGACCTTATCTCCAGAGATGACATCACAGTATGTGCCAGCAGGAAGACCAGTCTGTAAAGTGGC  
>DB7DT8Q1:335:H7TWNBCXX:1:2209:12361:62880/1  
CCCACCAGTTTAAAAAGGCTGACCATTGACCACATTCCTGAAGGCAACCATGTTCTGATTTGACGCCAT  
CTGTGTTACAGACCCAGTCATTGCCACAAGTAGTGTCTGCATTAATGGTCACTTCTTTTGTACTCCATT  
GTTATTGGGTGG  
>DB7DT8Q1:335:H7TWNBCXX:1:1215:13385:39154/1  
AATGGCTCCAAAGTCTCTTTCCAGCCTCCCCAGCAATGTGGGAACCCAGGCTGTGCCAATCAGGTGGAC  
ATTGTTAAGTGAGTATCCCAAATCAGACTGCAGAACGTTAACCAACAATGCCACTTCTGCCCCCACGACCC  
GGAC  
>DB7DT8Q1:335:H7TWNBCXX:1:2101:7941:45494/1  
CTGAGGACGAGCACTGCCACTGGAGTCCCTCCTCTAGCCAATCAAGAGAACTGACAACCAAGTCTTCCAAA  
GAGTCCAGCCGAGTGAACCTCAGAGACTTCTGCACCGTGG  
>DB7DT8Q1:335:H7TWNBCXX:1:2106:5061:79448/1  
AGCTGAGTTACTAATGGAAAAGTGAGCTTTGCCATCACTGCCAACATTCCTCTAAGTCCAGTGCAATTGC  
CATCGACCTTATCTCCAGAGATGACATCACAGTATGTGCCAGCAGGAAGACCAG  
>DB7DT8Q1:335:H7TWNBCXX:1:2107:7400:90207/1  
GGGATCCACACGCAGCTTGTGGGCATGCAGGTCGCTCAGAGCTGACAGGGCACCGGGCAGGTCATCGAGGT  
GGCCTGCAGCATTGGCCAGAGCATCGGCGACCTTCTTGCCGTGACCCTTGACCTGGGCAGAGCCGTGGCTT  
ACATCAAAGTGAGGGAAG  
>DB7DT8Q1:335:H7TWNBCXX:1:2114:12779:65047/1  
CACAGTATGTACCAGCAGGAAGACCAGTCTGTAAAGTGGCTGACAAAGCCCAGTCATCATTGTTAAAGACA  
ATGAATCCTCTGTTTCTCTGCTAAAAGCTACTTGGTTGCTGTTATTATCCCACCAGTTTAAAAAGGCTG  
ACCATTGACCACATTTCTG  
>DB7DT8Q1:335:H7TWNBCXX:1:2211:9248:6652/1  
GTACCGCAGTCTCAAGTTCCCGCGGATTGGATTGGAGCAGGCAGTGTGATCCACTCACCAGAGGTCTTAGG  
GTCCCGTGGGGAGTCCCCTGTGGACCTTGGCGGTGTTGGGCAAGACTCTGCTGGCAAGGTAGC  
>DB7DT8Q1:335:H7TWNBCXX:1:2104:9594:68454/1  
GGGGTCTACTCCACGAACAATGGAAGTATCATCAACCTGGTCCACGGTAGGGTCTGGAGGAGCGTCA  
GGTGTCTAGTCTGTGAGGTAGACAGGATCAAGCTCTGTTTCCCTCCTCAGATATCTGATAGACATTGAC  
>DB7DT8Q1:335:H7TWNBCXX:1:2104:18227:9305/1  
CAGCAGGTTACTAATGAAAAAGTGAGCTTTGCCATCACTGCCAACATTCCTCTAAGTCCAGTGCAATTG  
CCATCGACCTTATCTCCAGAGATGACATCACAGTATGTGCCAGGGAAGACCAG  
>DB7DT8Q1:335:H7TWNBCXX:1:2216:20510:14842/1

CCACAATACCTCTCCTGGGCATATATCCAGAAGATGTTCCAAC TGGTAAGAAAGGCACATGCTCCACTATG  
TTCATAGCAGGCTTATTTATAATAGCCAGAAGCTGGAAAGAACCAGATGCCCCACGACAGAGGAATGGAT  
ACAGAAAATGTGGTACAATTAATGGTATACTACTCAGCT  
>DB7DT8Q1:335:H7TWNBCXX:1:1105:11313:70389/1  
CCCCAATTCCTCTTAAAAACACTAAAACCCAAGTAATAACAGCAATCAAAC TAGCCAGGAATGGCGCTAC  
AGATCAGTAATCCCTGTACTCTGAAGGTGGAGACTGGAGGACGGGAAACTCAAG

**Cairns (Mouse/rat)**

TTTCCTCCCAAGCTACTCTTGGTTATAGTGCTTCATCATAGCAATAGTAACCCCATCTAAGATAACACCT  
CTAATACTTTCAACAGAGTTTCTGTTTCTGTCCTCAGACACACCAGAAGAGGGCATAAGATCCCATTACAG  
ATGGCTGTGAGACACCATGCGGTTGCTGGGAATTGAACTTTGGACCTCTGG

Mouse DNA sequence from clone RP23-134I10 on chromosome 17, complete sequence

Sequence ID: CT009607.7

Identities: 192/193(99%) Gaps: 0/193(0%)

|       |       |                                                              |       |
|-------|-------|--------------------------------------------------------------|-------|
| Query | 1     | TTTCCTCCCAAGCTACTCTTGGTTATAGTGCTTCATCATAGCAATAGTAACCCCATCTA  | 60    |
|       |       |                                                              |       |
| Sbjct | 51815 | TTTCCTCCCAAGCTACTCTTGGTTATAGTGCTTCATCATAGCAATAGTAACCCCATCTA  | 51756 |
| Query | 61    | AGATAACACCTCTAATACTTTCAACAGAGTTTCTGTTTCTGTCCTCAGACACACCAGAAG | 120   |
|       |       |                                                              |       |
| Sbjct | 51755 | AGATAACACCTCTAATACTTTCAACAGAGTTTCTGTTTCTGTCCTCAGACACACCAGAAG | 51696 |
| Query | 121   | AGGGCATAAGATCCCATTACAGATGGCTGTGAGACACCATGCGGTTGCTGGGAATTGAAC | 180   |
|       |       |                                                              |       |
| Sbjct | 51695 | AGGGCATAAGTCCCATTACAGATGGCTGTGAGACACCATGCGGTTGCTGGGAATTGAAC  | 51636 |
| Query | 181   | TTTGACCTCTGG                                                 | 193   |
|       |       |                                                              |       |
| Sbjct | 51635 | TTTGACCTCTGG                                                 | 51623 |

**Homo sapiens chromosome 20, alternate assembly CHM1\_1.1**

Sequence ID: NC\_018931.2

Identities: 24/24(100%) Gaps: 0/24(0%)

|       |          |                           |          |
|-------|----------|---------------------------|----------|
| Query | 83       | AACAGAGTTTCTGTTTCTGTCCCTC | 106      |
|       |          |                           |          |
| Sbjct | 56417389 | AACAGAGTTTCTGTTTCTGTCCCTC | 56417412 |

TCTGTAGACCAGGCTGGCTTCAAAGATCTGCCTTCCCTCTGTCTCCTAAGTGCTGGGATTAAAGGTTTACAC  
TACCACCCTAGCAATTAAGATACAAATTATAAGACTTAAGATTTTAGGTAGATGTAATTATACTTATAAT  
TTTTATTTT

Mus musculus BAC clone RP23-106G24 from chromosome 3, complete sequence

Sequence ID: AC163297.4

Identities: 151/151(100%) Gaps: 0/151(0%)

|       |       |                                                               |       |
|-------|-------|---------------------------------------------------------------|-------|
| Query | 1     | TCTGTAGACCAGGCTGGCTTCAAAGATCTGCCTTCCCTCTGTCTCCTAAGTGCTGGGATTA | 60    |
|       |       |                                                               |       |
| Sbjct | 30148 | TCTGTAGACCAGGCTGGCTTCAAAGATCTGCCTTCCCTCTGTCTCCTAAGTGCTGGGATTA | 30089 |
| Query | 61    | AAGGTTTACTACTACCACCCTAGCAATTAAGATACAAATTATAAGACTTAAGATTTTAGG  | 120   |
|       |       |                                                               |       |
| Sbjct | 30088 | AAGGTTTACTACTACCACCCTAGCAATTAAGATACAAATTATAAGACTTAAGATTTTAGG  | 30029 |
| Query | 121   | TAGATGTAATTATACTTATAATTTTATTTT                                | 151   |
|       |       |                                                               |       |
| Sbjct | 30028 | TAGATGTAATTATACTTATAATTTTATTTT                                | 29998 |

**PREDICTED: Homo sapiens centrosomal protein 63 (CEP63), transcript variant X31, mRNA**

Sequence ID: XM\_017007267.1

Identities: 39/49(80%) Gaps: 0/49(0%)

|       |      |                                                    |      |
|-------|------|----------------------------------------------------|------|
| Query | 44   | cctaagtgcctgggattaaaggTTTACTACTACCACCCTAGCAATTAAGA | 92   |
|       |      |                                                    |      |
| Sbjct | 1741 | CCAAAGTGCTGGAATTACAAGTGTGAGCTACCACCCTGGCAGTTAAGA   | 1789 |

CTAGAAAGACATTTTACCTTGTTC AATATGAAAGCAATGGAATAAACCATGTACAAACTAAAAAAGA  
GAGCCAGAACATACACAAGGTCCCAGGTTCTATCCCCAGCACCACAAAATCAGTAAGTACAGATTTGAAA  
GACGGTGTAGTTCCAGAGCTTGACAGAGTTGGTAAAGAAATTCCT



Mouse DNA sequence from clone RP23-240F13 on chromosome X, complete sequence

Sequence ID: AL844583.6

Identities: 185/186(99%) Gaps: 0/186(0%)

```
Query 1 CTAGAAAGACATTTTACCTTGTTCATATGAAAGCAATGGAATAAACCATGTACAAACT 60
|||||
Sbjct 2178 CTAGAAAGACATTTTACCTTGTTCATATGAAAGCAATGGAATAAACCATGTACAAACT 2119

Query 61 AAAAAAGAACTGAGCCAGAACATACACAAGGTCCAGGTTCTATCCCCAGCACCACAAA 120
|||||
Sbjct 2118 AAAAAAGAACTGAGCCAGAACATACACAAGGTCCAGGTTCTATCCCCAGCACCACAAA 2059

Query 121 ATCAGTAAGTACAGATTTGAAAGACGTTAGTTCAGAGCTTGACAGAGTTGGTAAAGA 180
|||||
Sbjct 2058 ATCAGTAAGTACAGATTTGAAAGACGTTAGTTCAGAGCTTGACAGAGTTGGTAAAGA 1999

Query 181 ATTCCCT 186
|||||
Sbjct 1998 ATTCCCT 1993
```

Homo sapiens chromosome 2, alternate assembly CHM1\_1.1

Sequence ID: NC\_018913.2

Identities: 25/26(96%) Gaps: 0/26(0%)

```
Query 61 AAAAAAGAACTGAGCCAGAACATACA 86
|||||
Sbjct 32235984 AAAAAAGAACTGAGCCAGACCATACA 32235959
```

AAGAGAAAGACCTTGGTCTTATGACGATCATATGCCCCAGTACAGGGGAATGCCAGGGCCAGGAAGCAGGA  
GTGGGTGGGTTGGGGAGCAGGGCGGGGGGAGGGTATAGGGAGCTTTGGGCATAGCATTTGAAATGTAAATG  
AAG

Mus musculus 6 BAC RP24-194N1 (Roswell Park Cancer Institute (C57BL/6J Male) Mouse BAC Library) complete sequence

Sequence ID: AC155727.6

Identities: 145/145(100%) Gaps: 0/145(0%)

```
Query 1 AAGAGAAAGACCTTGGTCTTATGACGATCATATGCCCCAGTAcagggggaatgccagggcc 60
|||||
Sbjct 164283 AAGAGAAAGACCTTGGTCTTATGACGATCATATGCCCCAGTACAGGGGAATGCCAGGGCC 164342

Query 61 aggaagcaggagtgggtgggtggggagcagggcggggggagggTATAGGGAGCTTTGGG 120
|||||
Sbjct 164343 AGGAAGCAGGAGTGGGTGGGTTGGGGAGCAGGGCGGGGGGAGGGTATAGGGAGCTTTGGG 164402

Query 121 CATAGCATTGAAATGTAATGAAG 145
|||||
Sbjct 164403 CATAGCATTGAAATGTAATGAAG 164427
```

Homo sapiens chromosome 7, alternate assembly CHM1\_1.1

Sequence ID: NC\_018918.2

Identities: 25/28(89%) Gaps: 0/28(0%)

```
Query 116 TTGGGCATAGCATTTGAAATGTAATGA 143
|||||
Sbjct 133050342 TTGGGCATATTATTTGAAATGTAATGA 133050369
```

ACCATGAGGTGCTGAGAAGAAGGTATATCCTTTTGTTTTAGGATAAAAATGTTCTGTAGATATCTGTCAGAT  
CCATTTGTTTCATCACTTCTGTTAGTTTCACTGTGTCCCTGTTTAGTTTCTGTTTCAATGATCTGTCCATT  
GGTGAAAGTGGTGTG

Mus musculus immunoglobulin kappa chain complex (Igk) on chromosome 6

Sequence ID: NG\_005612.1

Identities: 156/157(99%) Gaps: 0/157(0%)

```
Query 1 ACCATGAGGTGCTGAGAAGAAGGTATATCCTTTTGTTTTAGGATAAAAATGTTCTGTAGAT 60
|||||
Sbjct 34862 ACCATGAGGTGCTGAGAAGAAGGTATATCCTTTTGTTTTAGGATAAAAATGTTCTGTAGAT 34921

Query 61 ATCTGTCAGATCCATTTGTTTCATCACTTCTGTTAGTTTCACTGTGTCCCTGTTTAGTTT 120
|||||
Sbjct 34922 ATCTGTCAGATCCATTTGTTTCATCACTTCTGTTAGTTTCACTGTGTCCCTGTTTAGTTT 34981

Query 121 CTGTTTCAATGATCTGTCCATTGGTGAAGTGGTGTG 157
```





>DB7DT8Q1:306:HBCKVADXX:2:2116:15075:44621/1  
AGTGCATGCATGCATGCCTGTATGTGTGTAAACATGCATTTGTATCCATGTGTAAACTGGTGTACAAACTC  
CTGTGACATCCTCAGAAACAGCTTCTTTGGGATACTTTCTCACTGGCTTCATGCTCACCAACTAGACTAGG  
CTGGCACACCAGACAGTCCCAAGAGTCTGTCTGCTTCTGCCTCCCTGGTGTGGGAAGACAGGCAT

>DB7DT8Q1:306:HBCKVADXX:2:2116:15075:44621/1  
AGTGCATGCATGCATGCCTGTATGTGTGTAAACATGCATTTGTATCCATGTGTAAACTGGTGTACAAACTC  
CTGTGACATCCTCAGAAACAGCTTCTTTGGGATACTTTCTCACTGGCTTCATGCTCACCAACTAGACTAGG  
CTGGCACACCAGACAGTCCCAAGAGTCTGTCTGCTTCTGCCTCCCTGGTGTGGGAAGACAGGCAT

>DB7DT8Q1:306:HBCKVADXX:2:2116:10488:45536/1  
TCTCTACTTGAAAATTACTCTGAGATTTTAAACACACACACACACTTCTTTGTTCAGTGAAGGGGACTA  
GTGGCCATAGTTAGTAGATTGCTCATCACAATAATGAATGTAAATTGAGTGTGTGAATCAGACCCTATAA  
ATGTTGCTGTTATAAATTACTCATCTAAAGTCAAGTACTTACAAGTGATATTGAATTTTGGTCTCTT

>DB7DT8Q1:306:HBCKVADXX:2:2116:7811:46408/1  
AGTCCTTCTTCCCAAATGACTCCAGCTTGTATCAAGCAGACATAAAACTAGCCAGGACGGGCACCCAGAAG  
AGCGTTAAATGAACTTAGGAAAGCAACTCTGACAAACACCCATGCCCAAGGTTAGTAAAAGTCGAAGATAA  
TACAGGAAACAGAAGACATGATTGTTTACGAAGTAATATCATCACCAGACAGTGGGGC

>DB7DT8Q1:306:HBCKVADXX:2:2116:8878:46281/1  
AGTGGGGAACTGGTCACAGAGGTCGAAGATATCTAGGCAGCGGCCCTCTGGCATGCCAGAGCCCTGACCTC  
GTTTCTGGGGTCTGAAGTCACTGTGGTCGCACAAGCATAGCTGGCTTTTGCGGGCGGTGGAGGGGGAG

>DB7DT8Q1:306:HBCKVADXX:2:2116:9123:47075/1  
ATGTTGTTAATGTGAGAAAAGAATTTACATGTTTGTTCATTACCTAAGCTGACGTGTTTATATTACATTTA  
TTTTAATCTCCTTCCCTAATTCTCTCATTTAAGTTTTGTCTAGAAAAGAATAAAAATATTACATT

>DB7DT8Q1:306:HBCKVADXX:2:2116:10968:55966/1  
ATCCTATCAGACCACCATGGCCTAAGACTGATCTTCAATAACAACATAAATAATGGAAAGCCAACATTCAC  
GTGGAAACTGAATAACACTCTTCTCAATGATACCTTGGTCAAGGAAGGAATAAAGAAAGAAATTAAGACT  
TTTTAGAGTTTAATAAAAATGAAGCCACAACGTACCCAAAC

>DB7DT8Q1:306:HBCKVADXX:2:2116:5362:57947/1  
TTGCCTCAGTTGAGCAGCAGAGGAAAACACTGGCTAGCATTTAGAACACCAAAGCAGAAAGGCTTATCTCT  
GTATGATCAGACACTGCTGTGATCTGACCAGGGAAGGGCTGTTTACTACTCCATCTCTCTCTCTCTCAC  
ACACACACACATATGCACATACACGTACA

>DB7DT8Q1:306:HBCKVADXX:2:2115:11662:33025/1  
CAACCTTTTTACTTTCTTCATGGTATCCTTTGAAAACCAAAAAGCTTAACTTTTTTTTATTATTTTTGTGT  
GTACACACACAATTTTTTCAAGTATCTTTGGCAACTTCATGCATGTATATATTTTAGTCATTCTCACCCCTGA  
ATTAGCCTCAGCC

>DB7DT8Q1:306:HBCKVADXX:2:2115:12055:94240/1  
CACAGTGTGCTAATCAAGCAGACTCTGAAATAATATATAAAGATTGAGGCCTAATATTTATAAATCATAT  
AGTTACAGATGTAACATATATCTTAATTGAAGGCTTTCTCTCCAAAGAACAGAAACTTAAGTATAGATGTCA  
TGAAGAGGAAGCTGAGCCAACATAGTGGTGCCATCTGTCACTC

>DB7DT8Q1:306:HBCKVADXX:2:2116:14412:51883/1  
TATTGATTATATGTAAGTACACTGTAGCTGTCTTCAGACACTCCAGAAGAGGGCATCAGATTTTCATTAGGG  
ATGGTTGTGAGCCACCATGTGGTTGCCGGGACCTGAACTCTGGACCTTCGGAAGAGCAATCGGGTGTCTCT

>DB7DT8Q1:306:HBCKVADXX:2:2102:2979:92183/1  
CACTGTCAGACACAATAAGACACTTGAGTCTTTCTATGTTCCAACAACCATATGTAACGTAATACAAGCTA  
TTGCTACATGTCTGCTTCTCTGACACTAACTCCTTCATGAAACAAGGTAAAAA

>DB7DT8Q1:306:HBCKVADXX:2:2115:10056:90544/1  
ATGTGGTATTTAAATTGAGAACATATTAATTAATAAAGATATTTTAGTTTTTAATGGACAGCAATAGTGT  
TGCAAAATATGTACAAAGTCTTATAAGTCAACTTAAAGGACAAACAACCTTAAAGAGAGAAAGCTATCAGA  
TCAAAGGCATGGCTGTTGCTTATGTTCTAGTTCAGTG

>DB7DT8Q1:306:HBCKVADXX:2:2116:13350:47175/1  
GTGTCTCATGAATAAAGCTCTTGTCAAACATCATGAGGATCTGTGTCCAAACTTCCAGAACCCATGTAAAA  
GCTGGGCAAGGTAACGCACATCTGTAATCCAGTGTGCACAGTGAAGGAGGAGGAGGAGCATTC  
CAGGAAGCTCACAGACAAGATAGCCTGTATGCACAGCATTGAAAAACAAGGGACCCCTGATCT

>DB7DT8Q1:306:HBCKVADXX:2:2116:8926:47425/1

GGATATTCATGTTCCCTTATGTTAACAAAGTGTTTAAACAATCTAAAGACAGCGAAACCTGGGAGAACTGAGG  
CAAAATATGAGGTGGACTAGAGTCCCTTGAATAGCCCAGCTTACTCAGAGCATCTGACAATTTATACTTT  
GAGAGTTAAGAAGAGTCACATGAGTAAAGTGTACAAACACAAGGGCATGTTGCATGTGGCAGACC  
>DB7DT8Q1:306:HBCKVADXX:2:2116:10813:48095/1  
TCAGAAGCCACTCCATTTGCATCCATATTTCTGGAAAATGGGTATCAGAAAGTGCTACCTTCTGACCTTCC  
AAACAGAGTTCATTGATGGAATTTTAAATGAAAGTATACTTTTTACAATGTCATAATTCGGTGTGTGGTT  
TTTCTCTAAGAATGGCAACCCAGCTCAAAC  
>DB7DT8Q1:306:HBCKVADXX:2:2116:10141:49694/1  
GGACTGAAGGAAATGAAGGAGCTTGCAGCTACATAGGAAGAACAACAATATGAACCAACCAGTTCCCCTAG  
AGTTCCCAGGGACTAAACCCTAACCAAGAGAACCCATGGCTCCAGCTGCATATGTAGCAGAAAATGACC  
TTGTTGGA  
>DB7DT8Q1:306:HBCKVADXX:2:2116:8771:50099/1  
CCATTTTTTCCCTTTCATAAACTCCAGAGAAATGGGGGGAAAGTTACTGCCTCAAATTCAAAGAGGGGATAA  
CCAATCCTTTGGACATCTACTTCTGTTTGGCAATGTCTCAGAGTCTGATCTTGGTTCTACTCTACTGTGAC  
AATGAACAGGTTGGATTGTCAGTGTCTTTTGTCTTCCAGCAAAGCCTCCTGCGAATGTGA  
>DB7DT8Q1:306:HBCKVADXX:2:2116:14714:5501/1  
TATACAAAAGAAGATCCACTTAGATAATCACAACATTTGTTTTATATGATAATACATGAAAATATACTATTA  
AGAACAAATTAAGTAAATGCACGAGTCCCTTTATTCTTGGAAATGCTATATTGTTACAGTATTTTTAAAAA  
AAAAAAAAAAAAAAAAAACCAAAAGAGCACAAGC  
>DB7DT8Q1:306:HBCKVADXX:2:2116:6379:32912/1  
TGTACACACTGTAATTTACCAAAACCTGGGATATGCATCACATCTATCTGTCAAACATCTAGGGGTGGCAA  
TCTGCGAGGATTAACATCCACGGAAGGTGCATTAATAAATTTCTACACATTTACCACACTGTAGGACAATAT  
CTTGAGCTTCTGTTTCATGTGAGCTTAAA  
>DB7DT8Q1:306:HBCKVADXX:2:2116:9666:33682/1  
AGAGATTTCAAATTTAACTACTCAAGCAGAAGACATCTATTTTTACAACATATTTTCTTTATTTTAAAGTTA  
TTTTCTTTTACTTTCTTCCCTTCCCTGACCATTTATTATATGCAATTGTTTATATTGGGGGTTGTGAAATATTT  
CTTAGGCTAAAATACAAGATTATTTTTGATAATCTTT  
>DB7DT8Q1:306:HBCKVADXX:2:2116:8154:33978/1  
CCACTACATAATGAGGCCATGTCTCAAAAACCCAATCAATCAATCTTCCCCAGGCAGTGATGGCACATGC  
CTTTAATCTCAGCATTGGGAGGCAGAGGCAGGCGGATTTCTGAGTTTGAAGCCAGCCTGGTCTACAGAGT  
GAGTTCAGGAC  
>DB7DT8Q1:306:HBCKVADXX:2:2116:17010:34698/1  
GTGGTGGCACAAGCCTTTAGTTCAGCACTCAGGAGGCAGAGGCAGGTGGATTGCTGTGAGTCAGAAGCCA  
ACTTTGGTCTCTAAAGCAAGCACCAGGCCAGCCAGGGTTACATACTGAAACCCTATCTTAAAAAATAAGGG  
CAA  
>DB7DT8Q1:306:HBCKVADXX:2:2116:15143:35039/1  
TAATCAGGTCAGCATGCACAAAAATCTCTAGTAAATCTCTAATATAATTTTATCTCAGGATATTTTTAAA  
AAATCAAGTCATAAGGCAAGCATAATCAACTATGAGATCATATATACAGAAATACAGGATACTTTTAGCAG  
GAGTCATTTCTGCTATTCTGTACTGCAGGCTTATT  
>DB7DT8Q1:306:HBCKVADXX:2:2116:7833:35733/1  
ATTCTGCATATTTACTTATTTTCCAAAATAAATTAAGAAAGCTATTCACATCTCTTCCATTGGTTCTTT  
AATTACAATAACAATTTGATCTTCAAGACTTCTGAAACATTTCAAAAAGCAAAAAACTTCCCTGTTTTCAA  
ATAGCATATGCAAGTTAAAATGAAAATTTTATTTACCTTAATTATTTTTCT  
>DB7DT8Q1:306:HBCKVADXX:2:2208:1797:34895/1  
AATGTGAATGAAAACAATGGGGAGAGGAAGTGTGGAGGATTGGAATCTCCGCAGAGGCCCGCAGGTCCT  
AGGGACCAATGAGGTTCCCTTCTGCTCTCGGTGGTGGCCGGAAGTGGGAAAGCGGGATCATCTGTTCC  
>DB7DT8Q1:306:HBCKVADXX:2:2213:1979:37978/1  
CATTACCATTAGCGCTTTGTTTCTAAATAAAACAACACTAACTGTGGAAGATAACCAAGGAGAGAGGT  
TTCTGTGATGAAGCTTCTGAAATGTTTAAAGAAGTATGACATGGTAGATTATAGGGAGGCTTGAAAAGAGTA  
CTGACTTGAAAATATTTG  
>DB7DT8Q1:306:HBCKVADXX:2:2116:5004:40492/1  
CAATCTCATGTGCTGAGCCCTGAGCCACTTTTGGGAGAAAATTAATATTTATATTCAGAAGAAGAA  
ATGTTGGTATGCTTACCATAACTATCAATATCCTGTGAGCTATTTTTCTTTTCTGTCTGATTTAAAAA  
AAGTTAATTGTTACTGCTTAAGACTTGTGA  
>DB7DT8Q1:306:HBCKVADXX:2:2116:11100:40539/1  
TTATTTAGATTTCATTCTCTTTGCTTCCCTTTGTGCTACCTGGATGTCATCTGCCAGCTTCCCTGCTCTGCC  
ACTTGCTACCGGACTCCCAGTCATTGTGATATAGAT  
>DB7DT8Q1:306:HBCKVADXX:2:2116:14778:40927/1

TGTTTTGTGTATTTTGTGTGTTGAGACAAACTCTCATGACTGTGTATTTCTGGCTGGCCTAGAACTTGCTA  
TATGCACCAGGCTGACATCAAACCTCACAGAGATCTGAATCTGCCTGACTCTGATTCTGGGTGCTTAAAAG  
CATGACAATAATGTGTTTTTATAATAGCTGTCAG  
>DB7DT8Q1:306:HBCKVADXX:2:2116:18046:40969/1  
CAATTTGTGTCAGATTCATATATATATGAGACAAAAAATCTACCACTAAATAGGGATTCATTGTATG  
GTAGTGTGTTAAAACGTGATATCCTAACATCGTAATGTGTTAGCTTATACTCTATCACTAGTTACGATTT  
TAGTAAAAATTGTATGTTGTAGCTTCATTATCATTCTGATCCACTACAG  
>DB7DT8Q1:306:HBCKVADXX:2:2116:13582:41205/1  
TACGTTTCTGGTTTGTGTTTTTTTTTAATCTCTTTTATGTTAGCAATATATAAAAAATCATATGTGAAAT  
TCACTCAAAAAATGTCAGTAGATTGACTTTACCTCTAGAACATGGCAAATAACTTATAAAGCATATATTC  
TCAATGCCCCCTTGATAAAAATGCAATGTCAGCAGAAGTTAGCTCTGATATACTCTACTAGC  
>DB7DT8Q1:306:HBCKVADXX:2:2116:5461:42578/1  
AGGTAAGACTTTTCAATGGATGCTCCAACCTGTTGCAGTTGTAGAAGTGTACAGGTATGCAGTCAAAGAG  
GTACATGAACTGGATCATCCAAGCTTTTTCAGGTCTCTGGATATTAAGGG  
>DB7DT8Q1:306:HBCKVADXX:2:2116:6792:42591/1  
GCCATCGTGTAGCTAGGAACTGAAGGCAATACATAAGAAGGAAAAGAATGGAGGCTAGAGAGACGGCTTA  
GCAATAGAGGGTACTTGCCACTCACACAGAGGACCTGAGTTCAGTCCCAGCACTCGCAGGGTGGCACACA  
AGTCCACTGTAGTTCAAG  
>DB7DT8Q1:306:HBCKVADXX:2:2116:18225:43064/1  
TAACAATTTAAGAGAATGTCTCTACTAGCTTCTTCTTGTGTTATTGTAACCATGTAATATGCTTTACTAT  
AGGCTTAATAGCTTAAAAACAAGAGTTTTAGCTTCTTTGGTTCTGCATTGAGAAGGTCTATATACATATC  
TTTTAAAAATGTGAGGAATTTGTGTGTCTTTCTAGAACAG  
>DB7DT8Q1:306:HBCKVADXX:2:2115:3895:43895/1  
AACCTAGGAAGTTAGCCACCCCTCAAGTTTATTTCTGGAGACTTCTTTGAGACATTAACATTTTGTGGATC  
TGTGGTTGTGTGTGTGTGTGTGGGGGCAGTACTTCTTTGAAGGTAGTTGAGGGTGGAGGGAAAGGGGAG  
AAGGGATGGAGAGCTAGGGGTGTAAGCGGTACAGAGATCTCTTTTAAAA  
>DB7DT8Q1:306:HBCKVADXX:2:2116:12700:29417/1  
ACACATGTCGAGTTCTACAACAGTCAGGGCTGCACAGAATGCTACAAACAAACAAACATATTATTATTTTT  
TACTTTGTATTTTCTTGGCATATATTATCGTATATAAAATATAAACTTTCAAGATAGCATGATAGCTTTAC  
ACGAAGCATTCAATATCTATGGTCTTGATGCTTAGTCAAAGACTAATCACTGTATTTG  
>DB7DT8Q1:306:HBCKVADXX:2:2116:9882:30486/1  
TACAAGCTGCATCCAGCTGTGATTCCTTCTGCAGCCACCTTTTTATAAAGACAAAAAAGAGGGGACTTTT  
GCGGTATATGTCTGTCTTACACAGAGAGCAAACCTGTCTTCTAGTAGACAGGATGGTGTACTACTCAGGC  
TGAGAAGAAGGGCTGATGACTGGCCAGGACTCCTTTTAAAACTACTTTGCTGGGGCTGGGGGAGAC  
>DB7DT8Q1:306:HBCKVADXX:2:2116:5814:31553/1  
ATGCCATGACTGAGTGGTGTGTGAGTGAGTCCTCTGATGATGGACCATGCCATGTAGCAAGCGCTGCTT  
CCTTCCACCCACCACTCTCCTGGAAGCACGTTTGCATGTTGGATTTACAGCTTACCTTGTCTTAACTCCA  
TGTCGATAGATTCACCGTTAGATACTTGTTCCTCAAAGAGACTGTAGTAGAGTTCCA  
>DB7DT8Q1:306:HBCKVADXX:2:2116:9569:31776/1  
TATATAATTGCTTCAAGTCTATTTCTGAAGTGTGATGAAATTTATCCCCTGTGAACAAAACAACACAAA  
TGAAAAGAAACAATTGTCTTCTGTTTGCAGGCAACACTAGACAGAAGTTTTGTTTCATGAAGAATAAAGC  
CAGTGATTTTTGTCTAAATTTTGTATGAAAAGGA  
>DB7DT8Q1:306:HBCKVADXX:2:2116:14094:32747/1  
AACAAAGAATTTCTCACCTGAGGAATACCGAATGGCAGAGAAGCACTTGAAAAAATGTTCAACATCCTTAAT  
CATCAGGGAAATGCAATCAAAACAACCCTGAGATTCACCTCACACCAGTCAGAATGGCTAAGATCAAAA  
ATTCAGGTGACAGCAGATGCTGGCGAGGATG  
>DB7DT8Q1:306:HBCKVADXX:2:2116:15474:36484/1  
TTTCCCTCCCAAGCTACTCTTGGTTATAGTGCTTCATCATAGCAATAGTAACCCCATCTAAGATAACACCT  
CTAATACTTTCAACAGAGTTTCTGTTTCTGTCTCAGACACACCAGAAGAGGGCATAAGATCCCATTACAG  
ATGGCTGTGAGACACCATGCGGTTGCTGGGAATTGAACTTTGGACCTCTGG  
>DB7DT8Q1:306:HBCKVADXX:2:2116:8986:36868/1  
TCTGTAGACCAGGCTGGCTTCAAAGATCTGCCTTCTCTGTCTCCTAAGTGCTGGGATTAAGGTTTACAC  
TACCACCCTAGCAATTAAGATACAAATTTATAAGACTTAAGATTTTAGGTAGATGTAATTATACTTATAAT  
TTTTATTTT  
>DB7DT8Q1:306:HBCKVADXX:2:2116:5866:37370/1  
CTAGAAAGACATTTTACCTTGTTCATATGAAAGCAATGGAATAAACCATGTACAACTAAAAAGAAGT  
GAGCCAGAACATACACAAGGTCCCAGGTTCTATCCCCAGCACCAAAAATCAGTAAGTACAGATTTGAAA  
GACGGTGTAGTTCCAGAGCTTGACAGAGTTGGTAAAGAATTCCT

>DB7DT8Q1:306:HBCKVADXX:2:2116:7248:37537/1  
AAGAGAAAAGACCTTGGTCTTATGACGATCATATGCCCCAGTACAGGGGAATGCCAGGGCCAGGAAGCAGGA  
GTGGGTGGGTTGGGGAGCAGGGCGGGGGGAGGGTATAGGGAGCTTTGGGCATAGCATTGAAATGTAAATG  
AAG

>DB7DT8Q1:306:HBCKVADXX:2:2116:3568:38118/1  
ACCATGAGGTGCTGAGAAGAAGGTATATCCTTTTGTGTTTAGGATAAAAATGTTCTGTAGATATCTGTCAGAT  
CCATTTGTTTCATCACTTCTGTAGTTTCACTGTGTCCCTGTTTAGTTTCTGTTTCAATGATCTGTCCATT  
GGTGAAAGTGGTGTG

>DB7DT8Q1:306:HBCKVADXX:2:2116:9169:39421/1  
CCTGAACTTTGAATGCCAAGAAAAGTAATTTCTTTCCAATGAATAAGTCAGTATCAATGTCAAATCACTG  
GTCCCATCAGGTTCACTGCCCATTTGCAATTTGAAGCCATTCTCATAGAGGAATACACTGAGGATGTTTG  
>DB7DT8Q1:306:HBCKVADXX:2:2116:17522:39492/1  
AGAGAGACAAGAAAGTGATATGGGCAAAGAATCCAAAGATAGTTCTGAACAATCCCCTGGAGCTCTGGACT  
GTACATACTTCAGCAGTAGTCTACTTTCTCATCTGCATAAAGACTGCTTGCTCTGCCCTGGATCAAGACTA  
CTACAAAGATCAGAGGGCTGGAGAGATGGTTCAGCAG

>DB7DT8Q1:306:HBCKVADXX:2:2116:7569:39565/1  
CTGTGTTTCATTAAGAGATGATGTAACCTTTTAGCAGTGTTCTCCTGTATTTCTTTAAGTGATTTATTAAAG  
TCCTTCTTGATGTCTCTACCATCATCATGAGATATGCTTTTAAATCTAGGTCTAGGTTCTCAGGTGTGTT  
GGGGTTCCCTGGACTGGGCGAAGTGGGTG

>DB7DT8Q1:306:HBCKVADXX:2:2116:7643:39972/1  
CTTTTCATAGTCTCTGGTGAAAAGTCTGGTATAATTCTGATAGGCCTGCCTTTATATGTTACTTGACCCTTT  
TCCCTTACTACTTTTTAATATTCTATCTTTATTTAGTGCATTAGCTGCTCTGATTATTATGTGTTGGGAGGA  
ACTTCTTTTCTGGTCCAGTATATTTGGATTTCTGTA

>DB7DT8Q1:306:HBCKVADXX:2:2111:14986:11709/1  
AGCTTGCAAGGAGAAGGAGAAGAGCCCTTAGGGAGCTGCTTTCATCTCAGAGCAACCCAGTTTCTGTTTTA  
AAAAAAAAACAGTGAGCTCACTGTGTGCTCCAGAGCAATAATCAACTTAGCCTGGCTGGCTTGAAGCAGAG  
TGCTGTGTGGCGAGCTGCTCAGGAGTGTCT

>DB7DT8Q1:306:HBCKVADXX:2:2116:15075:44621/1  
AGTGCATGCATGCATGCCTGTATGTGTGTAAACATGCATTTGTATCCATGTGTAAACTGGTGTACAAACTC  
CTGTGACATCCTCAGAAACAGCTTCTTTGGGATACTTTCTCACTGGCTTCATGCTCACCAACTAGACTAGG  
CTGGCACACCAGACAGTCCCAAGAGTCTGTCTGCTTCTGCCTCCCTGGTGTGGGAAGACAGGCAT

>DB7DT8Q1:306:HBCKVADXX:2:2116:10488:45536/1  
TCTCTACTTGAAAATTACTCTGAGATTTTAAACACACACACACACTTCTTTGTTTCAGTGAAGGGGACTA  
GTGGCCATAGTTAGTAGATTGCTCATCACAATAATGAATGTAAATTGAGTGTGTGAATCAGACCCTATAA  
ATGTTGCTGTTATAAATTACTCATCTAAAGTCAAGTACTTACAAGTGATATTGAATTTTGGTCTCTT

>DB7DT8Q1:306:HBCKVADXX:2:2116:7811:46408/1  
AGTCCCTTCTTCCCAAATGACTCCAGCTTGATCAAGCAGACATAAAACTAGCCAGGACGGGCACCCAGAAG  
AGCGTTAAATGAACTTAGGAAAGCAACTCTGACAAACACCCATGCCAAAGGTTAGTAAAAGTCGAAGATAA  
TACAGGAAACAGAAGACATGATTGTTTACGAAGTAATATCATCACCAGACAGTGGGGC

>DB7DT8Q1:306:HBCKVADXX:2:2116:8878:46281/1  
AGTGGGGAACGGTCCAGAGGTCGAAGATATCTAGGCAGCGCCCTCTGGCATGCCAGAGCCCTGACCTC  
GTTTCTGGGGTCTGAAGTCACTGTGGTCGCACAAGCATAGCTGGCTTTTGCGGGCGGTGGAGGGGGAG

>DB7DT8Q1:306:HBCKVADXX:2:2116:9123:47075/1  
ATGTTGTTTAAATGTGAGAAAAGAAATTTACATGTTTGTTCATTACCTAAGCTGACGTGTTTATATTACATTTA  
TTTTAATCTCCTTCCCTAATTCTCTCATTTAAGTTTTGTCTAGAAAAGAATAAAAATATTACATT

>DB7DT8Q1:306:HBCKVADXX:2:2115:11662:33025/1  
CAACCTTTTTACTTTCTTCATGGTATCCTTTGAAAACAAAAAGCTTAACTTTTTTTTATTATTTTTTGTGT  
GTACACACACAATTTTTTCAAGTATCTTTGGCAACTTCATGCATGTATATATTTTAGTCATTCTCACCCCTGA  
ATTAGCCTCAGCC

>DB7DT8Q1:306:HBCKVADXX:2:2115:12055:94240/1  
CACAGTGTGCTAATCAAGCAGACTCTGAAATAATATATAAAGATTGAGGCCTAATATTTATAAATCATAT  
AGTTACAGATGTAACATATATCTTAATTGAAGGCTTTCTCTCCAAAGAACAGAACTTAAAGTATAGATGTCA  
TGAAGAGGAAGCTGAGCCAACTATAGTGGTGCCATCTGTCACTC

>DB7DT8Q1:306:HBCKVADXX:2:2116:14412:51883/1  
TATTGATTATATGTAAGTACACTGTAGCTGTCTTCAGACACTCCAGAAGAGGGCATCAGATTTTCATTAGGG  
ATGGTTGTGAGCCACCATGTGGTTGCCGGGACCTGAACTCTGGACCTTCGGAAGAGCAATCGGGTGTCTCT

>DB7DT8Q1:306:HBCKVADXX:2:2102:2979:92183/1

CACTGTCAGACACAATAAGACACTTGAGTCTTTCTATGTTCCAACAACCATATGTAACGTAATACAAGCTA  
TTGCTACATGTCTGCTGTTCCCTGACACTAACTCCTTCATGAAACAAGGTAAAAA  
>DB7DT8Q1:306:HBCKVADXX:2:2116:10968:55966/1  
ATCCTATCAGACCACCATGGCCTAAGACTGATCTTCAATAACAACATAAATAATGGAAAGCCAACATTCAC  
GTGGAAACTGAATAACACTCTTCTCAATGATACCTTGGTCAAGGAAGGAATAAAGAAAGAAATTAAGACT  
TTTTAGAGTTTAATAAAAAATGAAGCCACAACGTACCCAAAC  
>DB7DT8Q1:306:HBCKVADXX:2:2116:5362:57947/1  
TTGCCTCAGTTGAGCAGCAGAGGAAAACACTGGCTAGCATTTAGAACACCAAAGCAGAAAGGCTTATCTCT  
GTATGATCAGACACTGCTGTGATCTGACCAGGGAAGGGCTGTTTACTACTCCATCTCTCTCTCTCTCAC  
ACACACACACATATGCACATACACGTACA  
>DB7DT8Q1:306:HBCKVADXX:2:2115:10056:90544/1  
ATGTGGTATTTAAATTGAGAACATATTAATTAATAAAAAAGATATTTTAGTTTTTAATGGACAGCAATAGTGT  
TGCAAATATGTACAAAGTCTTATAAGTCAACTTAAAAGGACAAACAACCTTAAAGAGAGAAAGCTATCAGA  
TCAAAGGCATGGCTGTTGCTTATGTTCTAGTTCAGTG  
>DB7DT8Q1:306:HBCKVADXX:2:2116:13350:47175/1  
GTGTCTCATGAATAAAGCTCTTGTCAAACATCATGAGGATCTGTGTCCAAACTTCCAGAACCCATGTAAAA  
GCTGGGCAAGGTAACGCACATCTGTAATCCAGTGTGCACAGTGAGATGGAAGGCAGAGGCAGGAGCATTC  
CAGGAAGCTCACAGACAAGATAGCCTGTCATGCACAGCATTGAAAAACAAGGGACCCCTGATCT  
>DB7DT8Q1:306:HBCKVADXX:2:2116:8926:47425/1  
GGATATTCATGTTCCCTTATGTTAACAAAGTGTTTAAACAATCTAAAGACAGCGAAAACCTGGGAGAACTGAGG  
CAAAATATGAGGTGGACTAGAGTCCCTTGAATAGCCCAGCTTACTCAGAGCATCTGACAATTTATACTTT  
GAGAGTTAAGAAGAGTCACATGAGTAAAGTGTACAAACACAAGGGCATGTTGCATGTGGCAGACC  
>DB7DT8Q1:306:HBCKVADXX:2:2116:10813:48095/1  
TCAGAAAGCCACTCCATTTGCATCCATATTTCTGGAAAATGGGTATCAGAAAGTGCTACCTTCTGACCTTCC  
AAACAGAGTTCATTGATGGAATTTTAAATGAAAGTATACTTTTTTACAATGTCATAATTCGGTGTGTGGTT  
TTTCTCTAAGAATGGCAACCCAGCTCAAAC  
>DB7DT8Q1:306:HBCKVADXX:2:2116:10141:49694/1  
GGACTGAAGGAAATGAAGGAGCTTGCAGCTACATAGGAAGAACAACATATGAACCAACCAGTTCCTTAG  
AGTTCACAGGACTAAACCACTAACCAAGAGAACCCATGGCTCCAGCTGCATATGTAGCAGAAAATGACC  
TTGTTGGA  
>DB7DT8Q1:306:HBCKVADXX:2:2116:8771:50099/1  
CCATTTTTTCCCTTTCATAAACTCCAGAGAAATGGGGGGAAAGTTACTGCCTCAAATTCAAAGAGGGGATAA  
CCAATCCTTTGGACATCTACTTCTGTTTGCCAATGTCTCAGAGTCTGATCTTGGTTCTACTCTACTGTGAC  
AATGAACAGGTTGGATTGTGAGTGCCTTTGTTCTTCCAGCAAAGCCTCCTGCGAATGTGA  
>DB7DT8Q1:306:HBCKVADXX:2:2116:5004:40492/1  
CAATCTCATGTCATGGGTCTCAGCCTGAGCCACTTTTGGGAGAAAATTAATATTTATATTCAGAAGAAGAA  
ATGTTGGTATGTCTTACCATAACTATCAATATCCTGTGAGCTATTTTTCTTTTCTGTCTGATTTAAAAAAA  
AAGTTAATTGTTACTGCTTAAGACTTGTGA  
>DB7DT8Q1:306:HBCKVADXX:2:2116:11100:40539/1  
TTATTTTCAGATTCATTCTCTTTGCTTCCTTTGTGCTACCTGGATGTCATCTGCCAGCTTCCTGCTCTGCCC  
ACTTGCTACCGCGACTCCCCAGTCATTGTGATATAGAT  
>DB7DT8Q1:306:HBCKVADXX:2:2116:14778:40927/1  
TGTTTTGTGTATTTTGTGTTTGAGACAACTCTCATGACTGTGTATTTCTGGCTGGCCTAGAAGTTGCTA  
TATGCACCAGGCTGACATCAAACACAGAGATCTGAATCTGCCTGACTCTGATTCTGGGTGCTTAAAG  
CATGACAATAATGTGTTTTTATAATAGCTGTCAG  
>DB7DT8Q1:306:HBCKVADXX:2:2116:14714:5501/1  
TATACAAAGAAGATCCACTTAGATAATCACAACATTTGTTTTATATGATAATACATGAAAATATACTATTA  
AGAACAAATTAAGTAAATGCACGAGTCCTTTATTCTTGGAAATGCTATATTGTTACAGTATTTTTAAAAAAA  
AAAAAAAAAAAAAAAAAACCAAAAGAGCACAAGC  
>DB7DT8Q1:306:HBCKVADXX:2:2116:6379:32912/1  
TGTACACACTGTAATTTACCAAAACCTGGGATATGCATCACATCTATCTGTCAAACATCTAGGGGTGGCAA  
TCTGCGAGGATTAACATCCACGGAAGGTGCATTAATAAATCTACACATTTACCACACTGTAGGACAATAT  
CTTGAGCTTCTGTTTATGTGAGCTTAAA  
>DB7DT8Q1:306:HBCKVADXX:2:2116:9666:33682/1  
AGAGATTTCAAATTTAACTACTCAAGCAGAAGACATCTATTTTACAACATATTTTCTTTATTTTAAAGTTA  
TTTCTTTTACTTTCTTCTCCTTCCCTGACCATTTATATATGCAATTTGTTTATATTGGGGTTGTGAAATATTT  
CTTAGGCTAAAATACAAGATTATTTTGTGATAATCTTT  
>DB7DT8Q1:306:HBCKVADXX:2:2116:8154:33978/1



CCACTACATAATGAGGCCATGTCTCAAAAACACCAATCAATCAATCTTCCCCAGGCAGTGATGGCACATGC  
CTTTAATCTCAGCATTGGGAGGCAGAGGCAGGCGGATTTCTGAGTTTGAAGCCAGCCTGGTCTACAGAGT  
GAGTTCAGGAC  
>DB7DT8Q1:306:HBCKVADXX:2:2116:17010:34698/1  
GTGGTGGCACAAGCCTTTAGTTCAGCACTCAGGAGGCAGAGGCAGGTGGATTGCTGTGAGTCAGAAGCCA  
ACTTTGGTCTCTAAAGCAAGCACCAGGCCAGCCAGGGTTACATACTGAAACCCTATCTTAAAAAATAAGGG  
CAA  
>DB7DT8Q1:306:HBCKVADXX:2:2116:15143:35039/1  
TAATCAGGTCTGACATGCACAAAAATCTCTAGTAAATCTCTAATATAATTTTATCTCAGGATATTTTTAAA  
AAATCAAGTCATAAGGCAAGCATAATCAACTATGAGATCATATATACAGAAATACAGGATACTTTTAGCAG  
GAGTCATTTCTGCTATTCTGTTACTGCAGGCTTATT  
>DB7DT8Q1:306:HBCKVADXX:2:2116:7833:35733/1  
ATTCTGCATATTTACTTATTTTCCAAAATAAATTAAGAAAGCTATTCACATCTCTTTCCATTGGTTCTTT  
AATTACAATAACAATTTGATCTTCAAGACTTCTGAAACATTTCAAAAAGCAAAAACTTCCTTGTTTTCAA  
ATAGCATATGCAAGTTAAAATGAAAATTTTATTTACCTTAATTTTTTCT  
>DB7DT8Q1:306:HBCKVADXX:2:2208:1797:34895/1  
AATGTGAATGAAAACAATGGGGAGAGGAAGTGTGGAGGATTGGAATCTCCGCAGAGGCCCGCAGGTCACT  
AGGGACCAATGAGGTTCTTTCTGCTCTCGGTGGTGGCCGGAAGTGGGAAAGCGGGATCATCTGTTCC  
>DB7DT8Q1:306:HBCKVADXX:2:2213:1979:37978/1  
CATTACCATTAGCGCGTTTTGTTTCTAAATAAAACAACACTAAACTGTGGAAAGATACCAAGGAGAGAGGT  
TTCTGTGATGAAGCTTCTGAAATGTTTAAAGAAGTATGACATGGTAGATTATAGGGAGGCTTGAAAGAGTA  
CTGACTTGAAAAATATTTG  
>DB7DT8Q1:306:HBCKVADXX:2:2116:18046:40969/1  
CAATTTGTGTCAGATTCATATATATATGAGACAAAAAATCTACCCTAAATAGGGATTCATTGTATG  
GTAGTGTGTTAAACGTGATATCCCTAACATCGTAATGTGTTAGCTTATACTCTATCACTAGTTACGATTT  
TAGTAAAAATTGTATGTTGTAGCTTCATTATCATTTTTCTGATCCACTACAG  
>DB7DT8Q1:306:HBCKVADXX:2:2116:13582:41205/1  
TACGTTTCTGGTTTGTGTTTTTTTTTAAATCTCTTTTATGTTAGCAATATATAAAAAATCATATGTGAAAT  
TCACTCAAAAAATGTGAGTAGATTGACTTTACCTCTAGAACATGGCAAATAACTTATAAAGCATATATTC  
TCAATGCCCCCCTTGATAAAATGCAATGTGAGCAGAAGTTAGCTCTGATATACTCTACTAGC  
>DB7DT8Q1:306:HBCKVADXX:2:2116:5461:42578/1  
AGGTAAGACCTTTTCAATGGATGCTCCAACCTGTTGTCAGTTGTAGAAGTGTACAGGTATGCAGTCAAAGAG  
GTACATGAACTGGATCATCCAAGCTTTTTCAGGTCTCTGGATATTAAGGG  
>DB7DT8Q1:306:HBCKVADXX:2:2116:6792:42591/1  
GCCATCGTGTAGCTAGGAACTGAAGGCAATACATAAGAAGGAAAAGAATGGAGGCTAGAGAGACGGCTTA  
GCAATAGAGGGTACTTGCCACTCACACAGAGGACCTGAGTTTCACTCCCAGCACTCGCAGGGTGGCACACA  
AGTCCACTGTAGTTCAAG  
>DB7DT8Q1:306:HBCKVADXX:2:2116:18225:43064/1  
TAACAATTTAAGAGAATGTCTCTACTAGCTTCTTCTTGTGTTATTGTAACCATGTAATATGCTTTACTAT  
AGGCTTAATAGCTTAAAAACAAGAGTTTTAGCTTCTTTGGTTCTGCATTGAGAAGGTCATATACATATC  
TTTTAAAATGTGAGGAATTTGTGTGCTTTCTAGAACAG  
>DB7DT8Q1:306:HBCKVADXX:2:2115:3895:43895/1  
AACCTAGGAAGTTAGCCACCCCTCAAGTTTATTTCTGGAGACTTCTTTGAGACATTAACATTTTGTGGATC  
TGTGGTTGTGTGTGTGTGTGTGGGGCAGTACTTCTTTGAAGGTAGTTGAGGGTGGAGGAAAGGGGAG  
AAGGGATGGAGAGCTAGGGGTGTAAGCGGTACAGAGATCTCTTTTAAAA  
>DB7DT8Q1:306:HBCKVADXX:2:2116:12700:29417/1  
ACACATGTCGAGTTCTACAACAGTCAGGGCTGCACAGAATGCTACAAACAAACAAACATATTATTTTTT  
TACTTTGTATTTTCTTGGCATATATTATCGTATATAAATATAAACTTTCAAGATAGCATGATAGCTTTAC  
ACGAAGCATTATCTATGGTCTTGATGCTTAGTCAAAGACTAATCACTGTATTTG  
>DB7DT8Q1:306:HBCKVADXX:2:2116:9882:30486/1  
TACAAGCTGCATCCAGCTGTGATCTTCTGCAGCCACCTTTTTATAAAGACAAAAAAGAGGGGACTTTT  
GCGGTTATATGTCTGTCTTACACAGAGAGCAAAACCTGTCTTCTAGTAGACAGGATGGTGATCACTCAGGC  
TGAGAAGAAGGGCTGATGACTGGCCAGGACTCCTTTTAAAACTACTTTGCTGGGGCTGGGGAGAC  
>DB7DT8Q1:306:HBCKVADXX:2:2116:5814:31553/1  
ATGCCATGTACTGAGTGGTGTGTGAGTGAGTCTCTGATGATGGACCATGCCATGTAGCAAGCGCTGCTT  
CCTTCCACCACCCTCCTGGAAGCACGTTTGCATGTTTGGATTTACAGCTTACCTTGTCTTAACTCCA  
TGTCGATAGATTCACCGTTAGATACTTGTTTCCAAAGAGACTGTAGTAGAGTTCCA  
>DB7DT8Q1:306:HBCKVADXX:2:2116:9569:31776/1

TATATAATTGCTTCAAGTCTATTTCTGAAGTGTGATGAAATTATCCCCTGTGAACAAAACAACACAAA  
TGAAAAGAAACAATTGTCTTCTGTTTGCAGGCAACACTAGACAGAAGTTTTGTTTCATGAAGAATAAAAGC  
CAGTGATTTTTGTCTAAATTTTTGTTATGAAAAGGA  
>DB7DT8Q1:306:HBCKVADXX:2:2116:14094:32747/1  
AACAAAGAATTCTCACCTGAGGAATACCGAATGGCAGAGAAGCACTTGAAAAAATGTTCAACATCCTTAAT  
CATCAGGGAAATGCAAATCAAAAACAACCCTGAGATTCCACCTCACACCAGTCAGAATGGCTAAGATCAAAA  
ATTCAGGTGACAGCAGATGCTGGCGAGGATG  
>DB7DT8Q1:306:HBCKVADXX:2:2112:6442:4866\_1:N:0:GGCTACAT/1  
ATCTGGCATTCTAAATTAATTCAACATATATAAGAAAGATCTTAACAATTAGCCAAGAAGACTTATACTCT  
AAAGAATTCATTCAACCATAAAGTATGATTAATTTACCATTGTTTTGACACATGGCAGTTCAAGTTCAAC  
CTTGTTAC  
>DB7DT8Q1:306:HBCKVADXX:2:2112:7581:13704\_1:N:0:GTCTACAT/1  
CTGACTCGCTAAATACCCTTGCTGGTTGCTGCCACATCAGCCCCATGCAATGACCGCCACCTTGGGGTT  
AACTTGTGGTTACAATTCTCTGTAACCTAGTAAAATCAAACTCTAGAAGCTTATAATTAATCAGCCAACT  
TTATACGT  
>DB7DT8Q1:306:HBCKVADXX:2:2112:3987:25822\_1:N:0:GGCTACAT/1  
AGAGTGTGCGTGTCTTTGGCACTCTTTACACTCAATTTTTTAAATATTGATGTTTCATGGCCATACTGCGGC  
TGAACGTCATTGTTTCAGAGCCAGATATGCC  
>DB7DT8Q1:306:HBCKVADXX:2:2215:9654:89406\_1:N:0:GGCTACAT/1  
AACTCTCGCCCCTTGCAATGTTAAAACCTGCAGTTCCCTCCCTCTTTTCAGACAATAGCCAAAAGCCTAAGCC  
TGGTTGCCCTCGCTCTCTTAACATTTCTTTCTTTCTGTGTATCTCCCTCTCTGTGTCTCTGGGTGTATGT  
CTGTGTCT  
>DB7DT8Q1:306:HBCKVADXX:2:2115:3803:32267\_1:N:0:GGCTACAT/1  
ACTAGATGCCATAGGCAACAAAAAATGGGTTACTTCTTTTGGAGTTGTTTGTGAGTGAAGTCCCAAAGTC  
CCCAAATTTGTGTGTTATTGCCACTGATACCTATTACCATCCAGAATTTTTGTGATAATATACAGTTGTTGGA  
AACACCAC  
>DB7DT8Q1:306:HBCKVADXX:2:2115:14350:36515\_1:N:0:AGCTACAT/1  
TTACAATAAATGTATTTATTTTAAACTATTTGAAAGATCTTAACCCTGTTCTTAGCACTATAAAAAATAAAT  
GAATGACAAGCAGTGCCTAGCTTCTGCATAGAAAACATTGACTCCATCTTACACATTTGCTCTTTGCTTTAC  
AACTAAGA  
>DB7DT8Q1:306:HBCKVADXX:2:2115:5085:80292\_1:N:0:GGCTACAT/1  
TCTGATAGGATGCATGGAACAATTTCAATATTTTTGTATCTGTTGAGGCCAGTTTTGTGACCAATTATATG  
GTCAATTTTGGAGAAGGTACCACGAGGTGCTGAGAAGAAGGTATATCCTTTTTGTTTTAGGATAAAATGTTG  
TGAGATA  
>DB7DT8Q1:306:HBCKVADXX:2:2116:18147:11441\_1:N:0:GGCTACAT/1  
CCAAAACCTCCAGGAGGTGAGTCTCCGTGAACTCTGCCTTGTGAGTGCTTCCAGGCACCTTCCAGTGCACG  
GTGGCACTCCTGGAAGCGCAAATCCTGCTGAACTCAAGCAAGGAGTGACAAGATCTGCTCTATTCTCTTCT  
TAACTAGT  
>DB7DT8Q1:306:HBCKVADXX:2:2116:4330:24831\_1:N:0:GGCTACAT/1  
TACTGAAAATATTGAATAACAATATTTCTAGAAAGCTGTAAGAGGATGTCCTAATGATCCAAGGAGAAGAAC  
CAGTTGTGCAAAAAAAGCAACTTAATTGAATAATCATCCTACAAGTTCTACGCCTACCAAAGCCGGACTG  
CCTAGAAT  
>DB7DT8Q1:306:HBCKVADXX:2:2116:7355:34788\_1:N:0:AGCTACAT/1  
GAGTAAGTCACTCCCAGGGACCTCAGCCATTCTGAACATGCTCCCAGGGTCATAGGCTGAGCAGAGAGAGC  
TGGGACCTGAGGGAAGACAACATAGGAGATAAACTGCAACCCTTAGCTCAGTGAGCTGACCACAGTGCC  
TGCCCCTA  
>DB7DT8Q1:306:HBCKVADXX:2:2116:13914:37747\_1:N:0:GGCTACAT/1  
CTTAGGATTGTATTATTTTCTTTAGAGTATACAATGAAACGTTCTGTGTATATCAAATTCATAGTTGGTG  
CTGACAATCTAAGTTTATTCTGATAGAGTGACTGCCAATTAATGAAGAATGTAGAAAGTGGAACAAGAGG  
GGAAAGAT  
>DB7DT8Q1:306:HBCKVADXX:2:2116:17591:38065\_1:N:0:GGCTACAT/1  
TGTTAAATGGGATTTTAAATGCGTCTAACAGTTTTAAGTGTTACCCAGGAAGGAGACTGCCGCTCATTCTCT  
TCCTCCTCAATGTGGTCATTTGCTTTTCTTGATACCAGGCTGCATTCATTTAAACACAAAGTGTGGCAGA  
AATAAAGT  
>DB7DT8Q1:306:HBCKVADXX:2:2116:10117:44860\_1:N:0:GGCTACAT/1  
ATCCTTACAGATGGATATTTGTAGAGGAAAGACGCATAAGTACACAGTGAGCGGACGCACAGCTTGTAGGA  
CACACTTTGTACAAAAAGTGACACTGGCAAGGATGTCAAGTGGAACAATGATACTTCTATACTGCACAT  
TGATTTCT

>DB7DT8Q1:306:HBCKVADXX:2:2116:5341:46518\_1:N:0:GGCTACAT/1  
AGAAAGATGAGGCCAAATGGATGAGTGTGTTGCTTGGAAATTAGAATATTTGTAAGAACTCTATCCAGAATCT  
GCCTGTCTATCTAGATTTTTCTCCGTTTTCTGCTTTGAGTTGGGCATATGACCCATCAACCCACTCTGCCA  
TTGCTTTC

>DB7DT8Q1:306:HBCKVADXX:2:2116:16530:56595\_1:N:0:AGCTACAT/1  
AAAGATTTCCAGAATCCAGAAAGGCCATAAGGAATAGGTAAGAGTGTCTCAATAGGACCAGTGAAGGAAAT  
GGGAGTACTGAAAATACCCATAAAAATACCCAATCCAGTGTCTGGTTAGTGGACTTCCAGTGTAGGTCTTT  
TCCATCCC

>DB7DT8Q1:306:HBCKVADXX:2:2116:19450:61769\_1:N:0:TGCTACAT/1  
CTCTGTCTATTTTTATTGGCTTTCTTTATGAATCAGAGCAGGTTAAAAATCCCTTAGATCTCTCTGCAAAA  
ATGGTGATGACGGTCTCACTTACAAAGGCTTCTGTAGTTTAAATGAGTAGACACAGTGTCTATATACATT  
GGACTGAA

>DB7DT8Q1:306:HBCKVADXX:2:2116:15850:86550\_1:N:0:GGCTACAT/1  
AGATTCGCTCTTTTCATGCTATTCTCATTAAATTTCCATTGAATTGTAATGTATCAGAGATACTTTGGGGAT  
GTGTGAAAATTAACATGTATTCTAACACAAACCAACAAAGAAATTTGTGTGTAAGATCACTTCCCTCTTAAC  
TAAAGATT

>DB7DT8Q1:306:HBCKVADXX:2:1216:8622:63176\_1:N:0:GGCTAGAT/1  
AAGGCCCTTGGGAAGTGTCTGTCCCAGCACAGCAGCCCTGGCTGAGCACATCATGACCCTAACTGCATG  
CTCAGAGGCAGTGAGCACACCAGTCAGTAGCTGTAGCTAGGACATC

>DB7DT8Q1:306:HBCKVADXX:2:2115:12407:59788\_1:N:0:GGCTACAT/1  
ATTTTAAAACATAAAGTGGGTTTTTAAAACATCTCTTCTTCACTGAGTATGTCCCTATGTCCAGCTTTTGT  
CCAAGATTTTCATAGGTAGTAACTTACTGGAGTTCACAAAGCATTGCAAGGTGGTCACTGTCTATCAACA  
GATCGGAA

>DB7DT8Q1:306:HBCKVADXX:2:2115:6634:68820\_1:N:0:GGCTACAT/1  
TGAGCAAAGGGGTCAAAGTCATTCCTGGTGAAGAGGAAACATTTCTAGTCAGGTTCTAGAGCAGCAAGA  
TAGAGATGTTGGCCCACTTACCATGCGTAAAATTAGCTTGGGGTAGATCAAGACAACACGGCAATGGTAGA  
ACTATAGC

>DB7DT8Q1:306:HBCKVADXX:2:2110:12347:69510\_1:N:0:AGCTACAT/1  
TTTATAGGAAGCATTGTGTAATAACAACAAGTATGAAATTAGGATGTACATATTACAGGTACAAGCTTAA  
ATTATTGTTTAAACTATTTTGGCACACCTTTTTTCTCCTACAATACTTTGATATTTGCCATTTGAGAGAA  
AAATTTTA

>DB7DT8Q1:306:HBCKVADXX:2:2213:1701:67119\_1:N:0:AGCTACAT/1  
AGGGAAAAGGTCAAAGTAAATATAAAGGCAAGCCTATCAGAATTACACCAGATTTTTCCACCAGAGACTAT  
GAAAGCCAGAAGAGCCTGGACAGATGTTATACAGACACTAAGAGAACACAAATTCCAGCCCAGGCTACTAT  
ACCCAGCC

>DB7DT8Q1:306:HBCKVADXX:2:2105:20783:89916\_1:N:0:AGCTACAT/1  
CCTGTTGTAATTATTGCTTGTATATACTAATCATTGTATGTACAAAGCTTCTCCTCACACGGATACGATT  
TCCAAAATGGGAGAGATGATCTTTCACACTATTTAGAATGTGCTGGCAATATAATATCCATTATTCTTGCA  
AGTAAATA

>DB7DT8Q1:306:HBCKVADXX:2:2113:9272:82810\_1:N:0:GACTACAT/1  
GCTCCAAATTAAGTATTATAGTTCAAAGTAGAATATAAAGACTGGAAGGTGCTTCCATAAACATCATGGC  
AGCTCCAAAGACAAAAGGACCTTGTGTTGGACAGCAGACATGTGATAGAGGAGGCAAAGAACAGCACTGA  
AAAGTCAT

>DB7DT8Q1:306:HBCKVADXX:2:2103:15359:14832\_1:N:0:GGCTACCT/1  
ATGAACATAGTGGAGCATGTGTCTTCTTACCCGTTGGGGCATCTTCTGGATATATGCCCAGGAGAGGTAT  
TGCTGGATCCTCCGGTAGTACTATGTCCAATTTTCTGAGGAACCGCCAGACTGATTTCCAGAGTGGTTGTA  
CAAGCCTG

>DB7DT8Q1:306:HBCKVADXX:2:2207:9441:17686\_1:N:0:CGCTACAT/1  
GCATGTGACTTTTAAAAGTCTACTGTTATCCTTTCCCTTATTCCATGAAAATTTTAGAGAAATTTCCAGAT  
GGAAATGGACACTATCAAATGAGTCATTACACAGCTCA

>DB7DT8Q1:306:HBCKVADXX:2:2116:13068:34185\_1:N:0:GGCTACAT/1  
TATGAATTAGCTCTTTTACATACAGCATTATTGATTGAGAACTGCCCAAAAAGAGCTACTGTGTGTTAG  
TTCTGGTTTTTAATAAATTTATTAATCACAGCAGTCCCTTTGGATAGTATTGAGAGAACTTACACCTGTT  
TTGTGCA

>DB7DT8Q1:306:HBCKVADXX:2:2116:5637:38170\_1:N:0:AGCTACAT/1  
GTAGTTTTGAGCTGCTCTGTGGGTTCTGGGAATCCATATAAGAGCAAGCAGTAACTCCTGACTGCGGAGGG  
CCTCTCCGGCTCCACACTTTCCTGATATCCGTGGATGTTTTCTGTTACTTTTGTATGATCTGTCTTTGCT  
GACAAT

>DB7DT8Q1:306:HBCKVADXX:2:2116:4364:48059\_1:N:0:GGCTACCT/1  
CGAGATTCTTTCTTTACTTTTTCTTGCCCAAGTTCATGCTGTCCAGCTAGTCTTGGGGACAGGCCTGCCCT  
GACGTGTGTACACCCTGTTGGCAGTCACGTCATTACAGAACCTGCAGTTACTGGCAGGATTTTGT  
>DB7DT8Q1:306:HBCKVADXX:2:2112:6442:4866\_1:N:0:GGCTACAT/1  
ATCTGGCATTCTAAATTAATTCAACATATATAAGAAAGATCTTAACAATTAGCCAAGAAGACTTATACTCT  
AAAGAATTCATTCAACCATAAAGTATGATTAATTTACCATTGTTTTGACACATGGCAGTTCAAGTTCAAC  
CTTGTTAC  
>DB7DT8Q1:306:HBCKVADXX:2:2112:7581:13704\_1:N:0:GTCTACAT/1  
CTGACTCGCTAAATACCCTTGCTGGTGTGCTGCCACATCAGCCCCATGCAATGACCGCCACCTTGGGGTT  
AACTTGTGGTTACAATTCTCTGTAACCTAGTAAAATCAAACCTCTAGAAGCTTATAATTAATCAGCCAACT  
TTATACGT  
>DB7DT8Q1:306:HBCKVADXX:2:2112:3987:25822\_1:N:0:GGCTACAT/1  
AGAGTGTGCGGTGTCTTTGGCACTCTTTTACTCAATTTTTTAAATATTGATGTTTCATGGCCATACTGCGGC  
TGAACGTCATTGTTTCAGAGCCAGATATGCC  
>DB7DT8Q1:306:HBCKVADXX:2:2215:9654:89406\_1:N:0:GGCTACAT/1  
AACTCTCGCCCCTTGCATGGTTAAAACCTGCAGTTCCTCCCTCTTTTCAGACAATAGCCAAAAGCCTAAGCC  
TGGTTGCCCTCGCTCTCTTAACATTCTTTCTTTCTCTGTGTATCTCCCTCTCTGTGTCTCTGGGTGTATGT  
CTGTGTCT  
>DB7DT8Q1:306:HBCKVADXX:2:2115:3803:32267\_1:N:0:GGCTACAT/1  
ACTAGATGCCATAGGCCAAACAAAAAATGGGTTACTTCTTTTTGGAGTTGTTTGTGTCAGTGAAGTCCCAAAGTC  
CCCAAATTTGTGTGTTATTGCCACTGATACTTATTACCATCCAGAATTTTTGTGATAATATACAGTTGTTGGA  
AACACCAC  
>DB7DT8Q1:306:HBCKVADXX:2:2115:14350:36515\_1:N:0:AGCTACAT/1  
TTACAATAAATGTATTTATTTTAAACTATTTGAAAGATCTTAACCCTGTTCTTAGCACTATAAAAAATAAAT  
GAATGACAAGCAGTGCCTAGCTTCTGCATAGAAAACATTGACTCCATCTTACACATTGTCCTTTGCTTTTAC  
AACTAAGA  
>DB7DT8Q1:306:HBCKVADXX:2:2115:5085:80292\_1:N:0:GGCTACAT/1  
TCTGATAGGATGCATGGAACAATTTCAATATTTTTGTATCTGTTGAGGCCAGTTTTGTGACCAATTATATG  
GTCAATTTTGGAGAAGGTACCACGAGGTGCTGAGAAGAAGGTATATCCTTTTGTTTTAGGATAAAATGTTT  
TGTAGATA  
>DB7DT8Q1:306:HBCKVADXX:2:2116:18147:11441\_1:N:0:GGCTACAT/1  
CCAAAACCTCCAGGAGGTGAGTCTCCGTGAACTCTGCCTTGTGAGTGCTTCCAGGCACCTCACGTGCCAGC  
GTGGCACTCCTGGAAGCGCAAATCCTGCTGAACTCAAGCAAGGAGTGACAAGATCTGCTCTATTCTCTTCT  
TAACTAGT  
>DB7DT8Q1:306:HBCKVADXX:2:2116:4330:24831\_1:N:0:GGCTACAT/1  
TACTGAAAATATTGAATAACAATATTTCTAGAAAGCTGTAAGAGGATGTCCTAATGATCCAAGGAGAAGAAC  
CAGTTGTGCAAAAAAAGCAACTTAATTGAATAATCATCCTACAAGTTCTACGCCTACCAAAGCCGGACTG  
CCTAGAAT  
>DB7DT8Q1:306:HBCKVADXX:2:2116:7355:34788\_1:N:0:AGCTACAT/1  
GAGTAAGTCACTCCCAGGGACCTCAGCCATTCTGAACATGCTCCCAGGGTCATAGGCTGAGCAGAGAGAGC  
TGGGACCTGAGGGAAGACAACATAGGAGATAACACTGCAACCCTTAGCTCAGTGAGCTGACCACAGTGCC  
TGCCCTA  
>DB7DT8Q1:306:HBCKVADXX:2:2116:13914:37747\_1:N:0:GGCTACAT/1  
CTTAGGATTGTATTATTTTCTTTAGAGTATACAATGAAACGTTCTGTGTATATCAAATTCATAGTTGGTG  
CTGACAATCTAAGTTTATTCTGATAGAGTGACTGCCAATTAATGAAGAATGTAGAAAGTGGAACAAGAGG  
GGAAAGAT  
>DB7DT8Q1:306:HBCKVADXX:2:2116:17591:38065\_1:N:0:GGCTACAT/1  
TGTTAAATGGGATTTTAAATGCGTCTAACAGTTTTAAGTGTTACCCAGGAAGGAGACTGCCGCTCATTCTTT  
TCCTCCTCAATGTGGTCATTTGCTTTTCTTGATAACCAGGCTGCATTCAATTTAAACACAAAGTGTGGCAGA  
AATAAAGT  
>DB7DT8Q1:306:HBCKVADXX:2:2116:10117:44860\_1:N:0:GGCTACAT/1  
ATCCTTACAGATGGATATTTGTAGAGGAAAGACGCATAAGTACACAGTGAGCGGACGCACAGCTTGTAGGA  
CACACTTGTACAAAAAGTGACACTGGCAAGGATGTCAAGTGGAACAATGATACTTCTATACTGCACAT  
TGATTTCT  
>DB7DT8Q1:306:HBCKVADXX:2:2116:5341:46518\_1:N:0:GGCTACAT/1  
AGAAAGATGAGGCCAAATGGATGAGTGTGTTGCTTGGAAATGAAATATTTGTAAGAAGCTATCCAGAATCT  
GCCTGTCATCTAGATTTTTCTCCGTTTTCTGCTTTGAGTTTGGGCATATGACCCATCAACCCACTCTGCCA  
TTGCTTTC

>DB7DT8Q1:306:HBCKVADXX:2:2116:16530:56595\_1:N:0:AGCTACAT/1  
AAAGATTTCCAGAATCCAGAAAGGCCATAAGGAATAGGTAAGAGTGTCTCAATAGGACCAGTGAAGGAAAT  
GGGAGTACTGAAAATACCCATAAAAATACCCAATCCAGTGTCTGGTTAGTGGACTTCCAGTGTAGGTCTTT  
TCCATCCC

>DB7DT8Q1:306:HBCKVADXX:2:2116:19450:61769\_1:N:0:TGCTACAT/1  
CTCTGTCTATTTTTATTGGCTTTCTTTATGAATCAGAGCAGGTTAAAAATCCCTTAGATCTCTCTGCAAAA  
ATGGTGATGACGGTCCTCACTTCACAAGGCTTCTGTAGTTTAAATGAGTAGACACAGTGCTCATATACATT  
GGACTGAA

>DB7DT8Q1:306:HBCKVADXX:2:2116:15850:86550\_1:N:0:GGCTACAT/1  
AGATTCGCTCTTTTCATGCTATTCTCATTAAATTTCCATTGAATTGTAATGTATCAGAGATACTTTGGGGAT  
GTGTGAAAATTAACATGTATTCTAACACAAACCAACAAAGAAATTTGTGTGTAAGATCACTTCCCTCTTAAC  
TAAAGATT

>DB7DT8Q1:306:HBCKVADXX:2:1216:8622:63176\_1:N:0:GGCTAGAT/1  
AAGGCCCTTGGGAAGTGTCTGTCCCAGCACAGCAGCCCTGGCTGAGCACATCATGACCCTAACTGCATG  
CTCAGAGGCAGTGAGCACACCAGTCAGTAGCTGTAGCTAGGACATC

>DB7DT8Q1:306:HBCKVADXX:2:2115:12407:59788\_1:N:0:GGCTACAT/1  
ATTTTAAAACATAAAGTGGGTTTTTAAAACATCTCTTCTTCACTGAGTATGTCCATATGTCCAGCTTTTGT  
CCAAGGATTTTCATAGGTAGTAACCTACTGGAGTTCACAAAGCATTGCAAGGTGGTCACTGTATCACAACA  
GATCGGAA

>DB7DT8Q1:306:HBCKVADXX:2:2115:6634:68820\_1:N:0:GGCTACAT/1  
TGAGCAAAGGGGTCAAAGTCATTCCTGGTGAAGAGGAAACATTTCTAGTCAGGTTCTAGAGCAGCAAGA  
TAGAGATGTTGGCCCACTTACCATGCGTAAAATTAGCTTGGGGTAGATCAAGACAACACGGCAATGGTAGA  
ACTATAGC

>DB7DT8Q1:306:HBCKVADXX:2:2110:12347:69510\_1:N:0:AGCTACAT/1  
TTTATAGGAAGCATTTTGTGAATAACAACAAGTATGAAATTAGGATGTACATATTACAGGTACAAGCTTAA  
ATTATTGTTTAAACTATTTTGGCACACCTTTTTTCTCCTACAATACTTTGATATTTGCCATTTGAGAGAA  
AAATTTTA

>DB7DT8Q1:306:HBCKVADXX:2:2213:1701:67119\_1:N:0:AGCTACAT/1  
AGGGAAAAAGGTCAAGTAACATATAAAGGCAAGCCTATCAGAATTACACCAGATTTTTCCACCAGAGACTAT  
GAAAGCCAGAAGAGCCTGGACAGATGTTATACAGACACTAAGAGAACACAAATTCAGCCAGGCTACTAT  
ACCCAGCC

>DB7DT8Q1:306:HBCKVADXX:2:2105:20783:89916\_1:N:0:AGCTACAT/1  
CCTGTTGTAATTATTGCTTGTATATACTAATCATTGTATGTACAAAGCTTCTCCTCACACGGATACGATT  
TCCAAAATGGGAGAGATGATCTTTCACACTATTTAGAAATGTGCTGGCAATATAATATCCATTATTCTTGCA  
AGTAAATA

>DB7DT8Q1:306:HBCKVADXX:2:2113:9272:82810\_1:N:0:GACTACAT/1  
GCTCCAAATTAAGTATTATAGTTTCAAAGTAGAATATAAAGACTGGAAGGTGCTTCCATAAACATCATGGC  
AGCTCCAAAGACAAAAGGACCTTTGTTGTGGACAGCAGACATGTGATAGAGGAGGCAAAGAACAGCACTGA  
AAAGTCAT

>DB7DT8Q1:306:HBCKVADXX:2:2103:15359:14832\_1:N:0:GGCTACCT/1  
ATGAACATAGTGGAGCATGTGTCTTCTTACCCGTTGGGGCATCTTCTGGATATATGCCCAGGAGAGGTAT  
TGCTGGATCCTCCGGTAGTACTATGTCCAATTTTCTGAGGAACCGCCAGACTGATTTCCAGAGTGGTTGTA  
CAAGCCTG

>DB7DT8Q1:306:HBCKVADXX:2:2207:9441:17686\_1:N:0:CGCTACAT/1  
GCATGTGACTTTTAAAAGTCTACTGTTATCCTTTCTTATTCATGAAAATTTTLAGAGAAATTTCCAGAT  
GGAAATGGACACTATCAAATGAGTCATTACACAGCTCA

>DB7DT8Q1:306:HBCKVADXX:2:2116:13068:34185\_1:N:0:GGCTACAT/1  
TATGAATTAGCTCTTTTACATACAGCATTATTGATTGAGAACTGCCCCAAAAGAGCTACTGTGTGTTAG  
TTCTGGTTTTTAATAAATTTATTAATCACAGCAGTCCCTTTGGATAGTATTGAGAGAACTTACACCTGTT  
TTGTGCA

>DB7DT8Q1:306:HBCKVADXX:2:2116:5637:38170\_1:N:0:AGCTACAT/1  
GTAGTTTTGAGCTGCTCTGTGGGTTCTGGGAATCCATATAAGAGCAAGCAGTAACTCCTGACTGCGGAGGG  
CCTCTCCGGCTCCACACTTTCTGATATCCGTGGATGTTTTCTGTTACTTTTTGTTATGATCTGTCTTTGCT  
GACAAT

>DB7DT8Q1:306:HBCKVADXX:2:2116:4364:48059\_1:N:0:GGCTACCT/1  
CGAGATTTCTTTACTTTTTCTTGCCCAAGTTCATGCTGTCCAGCTAGTCTTGGGGACAGGCCTGCCCT  
GACGTGTGTACACCCTGTTGGCAGTCACGTCATTACAGAACCTGCAGTTACTGGCAGGATTTTGT





```

Sbjct 580 CCTGCATTTGTGGGGTGAATTCCTTGCCAAAGTTGCGGGCCAGCACACACCAGCACAT 521
Query 121 TGCCCAGGAGCTTAAAATTCCTCGGGATCCACGTGCAGCTTGTACAGTGAAGCTCACTGA 180
Sbjct 520 TGCCCAAGAGCCTGAAGTTCCTCAGGATCCACGTGCAGCTTGTACAGTGCAGCTCACTCA 461
Query 181 GCTTAGCAAAGGTGCCCTTGAGG 203
Sbjct 460 GCTGAGAAAAAGTGCCCTTGAGG 438

```

CCGCATGATCTCTGCAGCTTCTCTTTTCGGTGAAAGCCAGGTCACCACGCTCCTGAATCCGGCTGAATAGCT  
CACCACCTTCCATGCATTCCATGACGATGAGGAGACAGCGCTTGTGTGATGCATGTTCTCATAACAGTCC  
AGGATGCGCACAATGTGAGGGCCACCCGAGGCCTGCCAGTGGTGGTCCACCTCCTGCCGGGCCTTGGGGCT  
GTCGTACAGGAGCTTCAGGGCACATTTCTG

**PREDICTED: Canis lupus familiaris mitogen-activated protein kinase-activated protein  
kinase 3 (MAPKAPK3), mRNA**

Sequence ID: XM\_541872.5

Identities: 243/243(100%) Gaps: 0/243(0%)

```

Query 1 CCGCATGATCTCTGCAGCTTCTCTTTTCGGTGAAAGCCAGGTCACCACGCTCCTGAATCCG 60
Sbjct 693 CCGCATGATCTCTGCAGCTTCTCTTTTCGGTGAAAGCCAGGTCACCACGCTCCTGAATCCG 634
Query 61 GCTGAATAGCTCACCACCTTCCATGCATTCCATGACGATGAGGAGACAGCGCTTGCTGTG 120
Sbjct 633 GCTGAATAGCTCACCACCTTCCATGCATTCCATGACGATGAGGAGACAGCGCTTGCTGTG 574
Query 121 ATGCATGTTCTCATAACAGTCCAGGATGCGCACAATGTGAGGGCCACCCGAGGCCTGCCA 180
Sbjct 573 ATGCATGTTCTCATAACAGTCCAGGATGCGCACAATGTGAGGGCCACCCGAGGCCTGCCA 514
Query 181 GTGGTGGTCCACCTCCTGCCGGGCCTTGGGGCTGTCGTACAGGAGCTTCAGGGCACATTT 240
Sbjct 513 GTGGTGGTCCACCTCCTGCCGGGCCTTGGGGCTGTCGTACAGGAGCTTCAGGGCACATTT 454
Query 241 CTG 243
Sbjct 453 CTG 451

```

**PREDICTED: Homo sapiens mitogen-activated protein kinase-activated protein kinase 3  
(MAPKAPK3), transcript variant X1, misc\_RNA**

Sequence ID: XR\_940501.1

Identities: 219/243(90%) Gaps: 0/243(0%)

```

Query 1 CCGCATGATCTCTGCAGCTTCTCTTTTCGGTGAAAGCCAGGTCACCACGCTCCTGAATCCG 60
Sbjct 566 CCGCATATCTCTGCAGCTTCTCTCTCAGTGAAGCCTGGTCCGACGCTCCTGAATCCT 507
Query 61 GCTGAATAGCTCACCACCTTCCATGCATTCCATGACGATGAGGAGACAGCGCTTGCTGTG 120
Sbjct 506 GCTGAACAACCTCACCACCTTCCATGCATTCCATGATGATGAGGAGACAGCGCTTGCCATG 447
Query 121 ATGCATGTTCTCATAACAGTCCAGGATGCGCACAATGTGAGGGCCACCCGAGGCCTGCCA 180
Sbjct 446 GTGCATGTTCTCATAACATCCAGGATGCAGACAATATGGGGCCGCCAGAAGCCTGCCA 387
Query 181 GTGGTGGTCCACCTCCTGCCGGGCCTTGGGGCTGTCGTACAGGAGCTTCAGGGCACATTT 240
Sbjct 386 GTGATGGTCTACCTCCTGCCGGGCCTTGGGGCTGTCATACAGGAGCTTCAGGGCACACTT 327
Query 241 CTG 243
Sbjct 326 CTG 324

```

**Cairns (Cow)**

CCCTCCAGCATCAGGGTCTTTTCCAATGAGTCAACTCTTCGCATGAGATGGCCAAAGTATTGGAGTTTCA  
GCTTCAGCATCAGTCTTCCAATGAACACCCAGGATTGGTCTCCTTTAGGATGGACTGCTTGGATCTCCTT  
GCAGTCCAAGGG

**PREDICTED: Bos indicus angiotensin II receptor type 1 (AGTR1), mRNA**

Sequence ID: XM\_019961143



**Identities 149/154(97%) Gaps 0/154(0%)**

```
Query 1 CCCTCCCAGCATCAGGGTCTTTTCCAATGAGTCAACTCTTCGCATGAGATGGCCAAAGTA 60
      ||||| ||||| ||||| ||||| ||||| ||||| ||||| ||||| ||||| ||||| |||||
Sbjct 2063 CCCTCTCAGCATCAGGGTCTTTTCCAATGAGTCAACTCTTCGCATGAGGTGGCCAAAGTA 2122

Query 61 TTGGAGTTTCAGCTTCAGCATCAGTCCTTCCAATGAACACCCAGGATTGGTCTCCTTTAG 120
      ||||| ||||| ||||| ||||| ||||| ||||| ||||| ||||| ||||| |||||
Sbjct 2123 TTGGAGTTTCAGCTTCAGCATCAGTCCTTCCAATGAACACCCAGGACTGATCTCCTTTAG 2182

Query 121 GATGGACTGCTTGGATCTCCTTGCAGTCCAAGGG 154
      ||||| ||||| ||||| ||||| ||||| |||||
Sbjct 2183 GATGGACTGGTGGATCTCCTTGCAGTCCAAGGG 2216
```

**Homo sapiens angiotensinogen (AGT), mRNA**

Sequence ID: [NM\\_000029.3](#)

**Identities 25/26(96%) Gaps 0/26(0%)**

```
Query 84 GTCCTTCCAATGAACACCCAGGATTG 109
      ||||| ||||| ||||| |||||
Sbjct 1012 GTCCTTCCAAGGAACACCCAGGATTG 987
```

**Bangkok (Cow)**

GGCTGGATGGCATCACTGACTCAATGGACATGAGTCTGAGTGAACCTCCGGGAGTTGGTGATGGACAGGGAG  
GCCTGTCGTGCTGCGATTTCATGGGGTTGCAAAGAGTCGG

Bos taurus Y Chr BAC CH240-49F14 (Children's Hospital Oakland Research Institute  
Bovine BAC Library (male)) complete sequence

Sequence ID: [AC226423.5](#)

**Identities 107/110 (97%) Gaps 0/110 (0%)**

```
Query 1 GGCTGGATGGCATCACTGACTCAATGGACATGAGTCTGAGTGAACCTCCGGGAGTTGGTGA 60
      ||||| ||||| ||||| ||||| ||||| ||||| ||||| ||||| ||||| |||||
Sbjct 5350 GGCTGGATGGCATCACTGACTCAATGGACATGAGTCTGAGTGAACCTCCGGGAGTTGGTGA 5409

Query 61 TGGACAGGGAGGCTGTCGTGCTGCGATTTCATGGGGTTGCAAAGAGTCGG 110
      ||||| ||||| ||||| ||||| ||||| ||||| ||||| ||||| |||||
Sbjct 5410 TGGACAGGGAGGCTGGCGTGTGATTTCATGGGGTTGCAAAGAGTCGG 5459
```

**Homo sapiens chromosome 15, alternate assembly CHM1\_1.1**

Sequence ID: [NC\\_018926.2](#)

**Identities 27/30(90%) Gaps 1/30(3%)**

```
Query 42 GAACTCCGGGAGTTGGTGATGGACAGGGAG 71
      ||||| || ||||| ||||| |||||
Sbjct 78558460 GAACTCAGG-AGTTTGTGATGGACAGGGAG 78558488
```
